# Supplementary material
Source: publisher figshare collection journal article supplement (https://gsapubs.figshare.com/articles/dataset/_/19067528)
Supplement: Supplementary file 1 [file 2]

## Sheet: Contents of S1
Table S1
Contents:
Sheet Name	Description
This Study--Ar	Newly presented 40Ar/39Ar hornblende, biotite, and potassium feldspar data from this study.
This Study--HO Ar	Detailed isotopic values for 40Ar/39Ar hornblende data from this study.
This Study--BI Ar	Detailed isotopic values for 40Ar/39Ar biotite data from this study.
This Study--FS Ar	Detailed isotopic values for 40Ar/39Ar potassium feldspar data from this study.
This Study--Detrital BI Ar	Detailed isotopic values for 40Ar/39Ar detrital biotite data from this study.
This study--Nenana Gl. dZ	Detailed isotopic values for U-Pb single grain zircon data from this study.
This study- U-Pb bedrock	Newly presented U-Pb zircon bedrock crystallization data from this study.
This study--Pyramid U-Pb	Detailed isotopic values for U-Pb single grain zircon data for sample 01Pyramid from this study.
This study--20RAP U-Pb	Detailed isotopic values for U-Pb single grain zircon data for sample 20RAP from this study.
This study--AFT	Newly presented apatite fission track data from this study.
This study--AHe	Newly presented apatite (U-Th)/He data from this study and age vs eU and age vs rs graphs.
Legacy--AFT	Previously published apatite fission track data from the eastern Alaska Range.
Legacy--AHe	Previously published (U-Th)/He data from the eastern Alaska Range.
2019Ar dikes--Trop	Previously published 40Ar/39Ar ground mass dike data from the western and eastern Alaska Range.
2019Ar--Benowitz	Previously published 40Ar/39Ar muscovite data from the eastern Alaska Range.
2014Ar--Benowitz	Previously published 40Ar/39Ar muscovite, biotite, and potassium data from the eastern Alaska Range.
2014Ar--Riccio	Previously published 40Ar/39Ar muscovite, biotite, and potassium data from the eastern Alaska Range.
2011Ar--Benowitz A	Previously published 40Ar/39Ar hornblende, muscovite, biotite, and potassium data from the eastern Alaska Range.
2011Ar--Benowitz B	Previously published 40Ar/39Ar biotite and potassium data from the eastern Alaska Range.
<1 Ma--Ar	Previously published 40Ar/39Ar groundmass data on young volcanics from the eastern Alaska Range.
Legacy--K-Ar	Previously published K-Ar hornblende, muscovite, and biotite data from the eastern Alaska Range.
2021U-Pb--Regan Bed	Previously published U-Pb zircon bedrock data from the eastern Alaska Range.
2021U-Pb--Regan Det	Previously published U-Pb single grain zircon detrital data from the eastern Alaska Range.
Legacy--U-Pb	Previously published U-Pb zircon bedrock data from the eastern Alaska Range.
2013U-Pb--Nokleberg	Previously published U-Pb zircon detrital data from the eastern Alaska Range.
2021Wrangells-Trop	Previously published U-Pb zircon bedrock and detrital data and 40Ar/39Ar bedrock and detrital data from the Wrangell Volcanic field <30 Ma.
2021U-Pb--Jones	Previously published U-Pb zircon bedrock data from the western Alaska Range <100 Ma.
2020U-Pb-Regan	Previously published U-Pb zircon bedrock and single grain zircon and detrital data from the central Alaska Range <100 Ma.
2016U-Pb--Lease	Previously published U-Pb single grain zircon detrital data from the western and central Alaska Range <100 Ma .
Fairweather Geochronology	Previously published thermochronology from the Fairweather Range.
Fig 14 Cooling Curves	Data used to construct rock cooling curves for figure 14.
ALC U-Pb Methods	Methods for U-Pb zircon dating at the Arizona Lazerchron facility.

## Sheet: This study--Ar
This study--Ar
L= Laser Run	Preferred age determination in bold
F= Furnace Run
HO: Hornblende
BI: Biotite
FS: Potassium Feldspar
Hornblende
	Location	(WGS84)	Elv. (m)	Rock Type
Sample Name	Lat (°N)	Long (°W)			Integrated	Plateau	# of	MSWD	% of 39Ar	Inverse Isochron				North or South of Denali Fault
					Age (Ma)	Age (Ma)	steps		Release	Min Age (Ma)	40Ar/36/Ari	MSWD	# of Steps
18DEB HO#L1	63.5489	147.264	1427	granitoid	43.1 ± 1.5	44.5 ± 1.2	5 out of 14	0.71	89.9	N/A	N/A	N/A	N/A	North
67SUS HO#L1	63.5251	147.079	1624	granitoid	69.8 ± 0.6	67.4 ± 0.6	6 out of 11	0.62	76	N/A	N/A	N/A	N/A	South
15CSR14 HO#L1	63.5339	147.062	1435.24	orthogneiss	49.4 ± 0.9	44.3 ± 1.0	4 out of 8	1.39	65.9	N/A	N/A	N/A	N/A	North
15CSR12 HO#L1	63.5294	147.057	1328.77	metased	38.9 ± 1.5	32.9 ± 1.2	5 out of 8	0.37	98.3	N/A	N/A	N/A	N/A	North
15CSR10 HO#L1	63.5279	147.055	1281.79	metased	34.1 ± 0.3	30.0 ± 0.5*	6 out of 8	3.23	95.4	N/A	N/A	N/A	N/A	North
86SUS HO#L1	63.5363	146.994	1340	amphibolite	46.3 ± 0.3	43.1 ± 0.3 **	1 out of 8	N/A	67.7	N/A	N/A	N/A	N/A	North
90CSUS HO#L1	63.5205	146.848	1275	granitoid	45.8 ± 0.2	42.7 ± 0.3	2 out of 8	2.1	56.5	N/A	N/A	N/A	N/A	North
32RAP HO#L1	63.5219	146.685	2067	granitoid	35.5 ± 0.3	34.3 ± 0.4	3 out of 12	1.21	68.2	N/A	N/A	N/A	N/A	North
41RAP HO#L1	63.4916	146.506	1811	granitoid	41.0 ± 0.2	37.4 ± 0.1**	1 out of 8	N/A	52.7	N/A	N/A	N/A	N/A	North
*15CSR10 HO#L1	MSWD is >2.5 so does not meet the criteria of a plateau age so weighted average age applied
*86SUS HO#L1	Majority of 39Ar release was in one step so weighted average age applied
***41RAP HO#L1	Majority of 39Ar release was in one step so weighted average age applied
Biotite
	Location	(WGS84)	Elv. (m)	Rock Type	Integrated	Plateau	# of	MSWD	% of 39Ar	Inverse Isochron				North or South of Denali Fault
Sample Name	Lat (°N)	Long (°W)			Age (Ma)	Age (Ma)	steps		Release	Min Age (Ma)	40Ar/36/Ari	MSWD	# of Steps
45NEN BI#L1	63.5377	147.873	1427	granitoid	37.2 ± 0.1	37.8 ± 0.2	8 out of 14	2.28	83	N/A	N/A	N/A	N/A	North
43NEN BI#L1	63.5049	147.917	1817	granitoid	38.2 ± 0.5	39.6 ± 0.5	9 out of 14	0.49	82.9	40.1 ± 0.8	291.6 ± 9.4	0.52	9 of 14	North
41NEN BI#L1	63.4991	147.91	1609	granitoid	36.6 ± 0.1	37.6 ± 0.2*	5 out of 15	2.94	50.4	N/A	N/A	N/A	N/A	North
02NEN BI#L1	63.5259	147.866	1466	granitoid	36.3 ± 0.2	37.0 ± 0.2	8 out of 13	1.02	88.2	N/A	N/A	N/A	N/A	North
48NEN BI#L1	63.5507	147.853	1982	granitoid	36.7 ± 0.3	37.2 ± 0.2	11 out of 14	0.33	94.4	N/A	N/A	N/A	N/A	North
03NEN BI#L1	63.5191	147.836	1708	granitoid	36.8 ± 0.2	35.9 ± 0.3	9 out of 13	1.99	78	N/A	N/A	N/A	N/A	North
30NEN BI#L1	63.5046	147.785	1155	granitoid	34.0 ± 0.1	35.0 ± 0.1	4 out of 15	0.83	58.8	N/A	N/A	N/A	N/A	North
10CH05B BI#L1	63.5156	147.657	1562	metased	25.8 ± 0.2	24.6 ± 0.3*	4 out of 8	3.27	50.9	N/A	N/A	N/A	N/A	North
10CH13 BI#L1	63.5153	147.645	1697	granitoid	26.9 ± 0.1	26.4 ± 0.2**	3 out of 7	0.2	45.6	N/A	N/A	N/A	N/A	North
10CH09 BI#L1	63.5164	147.644	1728	granitoid	26.5 ± 0.1	27.0 ± 0.1***	2 out of 7	0.4	63.3	N/A	N/A	N/A	N/A	North
15CSR06 BI#L1	63.522	147.566	1680.76	orthogneiss	19.2 ± 0.1	18.8 ± 0.1**	2 out of 8	2.28	44.8	N/A	N/A	N/A	N/A	North
15CSR05 BI#L1	63.5125	147.563	1504.55	orthogneiss	26.5 ± 0.2	26.6 ± 0.2	5 out of 8	0.57	84.1	26.5 ± 0.3	299.7 ± 15.6	0.71	5 out of 8	North
43DEB BI#L1	63.5371	147.365	1484	granitoid	16.2 ± 0.1	16.4 ± 0.2*	4 out of 7	2.74	92.6	N/A	N/A	N/A	N/A	North
25DEB BI#L1	63.5932	147.348	2042	granitoid	27.9 ± 0.5	28.4 ± 0.5	8 out of 13	0.57	78.6	N/A	N/A	N/A	N/A	North
22DEB BI#L1	63.5391	147.324	1341	orthogneiss	N/A	15.8 ± 0.2****	4 out of 8	0.85	N/A	N/A	N/A	N/A	N/A	North
12DEB BI#L1	63.582	147.207	1859	granitoid	31.4 ± 0.2	31.8 ± 0.2	9 out of 14	1.59	87	31.8 ± 0.2	292.8 ± 3.9	1.66	9 out of 14	North
10DEB BI#L1	63.5787	147.199	1859	granitoid	27.9 ± 0.2	28.2 ± 0.1	8 out of 14	1.03	78	N/A	N/A	N/A	N/A	North
15DEB BI#L1	63.5929	147.185	1850	granitoid	29.0 ± 0.1	31.3 ± 0.2	4 out of 14	0.77	58.1	N/A	N/A	N/A	N/A	North
65SUS BI#L1	63.5284	147.111	1629	granitoid	51.6 ± 0.4	53.3 ± 0.4	8 out of 10	0.8	89.6	N/A	N/A	N/A	N/A	South
54SUS BI#L1	63.5335	147.105	1804	granitoid	19.2 ± 0.2	19.2 ± 0.2	8 out of10	0.69	80.9	20.5 ± 0.3	280.3 ± 7.8	0.16	8 out of 10	North
15CSR08B BI#L1	63.5335	147.09	1732.68	orthogneiss	18.1 ± 0.1	18.1 ± 0.1	7 out of 8	0.74	98.7	18.3 ± 0.1	275.5 ± 14.3	0.38	7 out of 8	North
60SUS BI#L1	63.5339	147.087	1737	granitoid	16.9 ± 0.1	17.3 ± 0.2	8 out of 10	0.74	80.9	N/A	N/A	N/A	N/A	South
15CSR07B BI#L1	63.5289	147.087	1597.7	fault gauge	18.9 ± 0.2	18.8 ± 0.2	6 out of 8	0.25	96.7	18.9 ± 0.2	284.7 ± 21.3	0.25	6 out of 8	North
67SUS BI#L1	63.5251	147.079	1624	granitoid	41.2 ± 0.2	42.0 ± 0.2	8 out of 10	0.83	91.3	41.2 ± 0.2	301.9 ± 17.3	0.94	8 out of 10	South
15CSR10 BI#L1	63.5279	147.055	1281.79	metased	26.7 ± 0.2	27.9 ± 0.2	5 out of 8	0.89	69.5	N/A	N/A	N/A	N/A	North	excess 40Ar?
91SUS BI#L1	63.5263	147.05	1233	granitoid	39.4 ± 0.4	41.7 ± 0.5	5 out of 12	0.43	67.1	N/A	N/A	N/A	N/A	South
06BAL BI#L1	63.6196	146.928	2062	granitoid	25.3 ± 0.1	26.2 ± 0.2**	3 out of 10	2.39	43.4	N/A	N/A	N/A	N/A	North
23BAL BI#L1	63.6282	146.909	2214	granitoid	28.6 ± 0.2	28.9 ± 0.2	5 out of 9	2.09	83.6	N/A	N/A	N/A	N/A	North
21BAL BI#L1	63.6178	146.898	2117	granitoid	25.7 ± 0.1	25.9 ± 0.1	7 out of 8	0.57	83.7	N/A	N/A	N/A	N/A	North
01BAL BI#L1	63.6326	146.864	2499	granitoid	28.9 ± 0.1	29.5 ± 0.2	5 out of 13	2.51	59.2	N/A	N/A	N/A	N/A	North
32RAP BI#L1	63.5219	146.685	2067	granitoid	25.4 ± 0.2	25.4 ± 0.2	11 out of 14	0.19	98.2	N/A	N/A	N/A	N/A	North
27RAP BI#L1	63.5172	146.603	2051	granitoid	20.1 ± 0.1	20.2 ± 0.1	7 out of 10	0.21	67.2	N/A	N/A	N/A	N/A	North
33RAP BI#L1	63.5048	146.558	2124	granitoid	18.9 ± 0.1	19.1 ± 0.2	4 out of 10	2.32	61.3	19.2 ± 0.1	290.3 ± 3.4	1.58	4 out of 10	North
34RAP BI#L1	63.5073	146.555	2303	granitoid	20.5 ± 0.1	20.6 ± 0.1	7 out of 9	0.83	96.2	N/A	N/A	N/A	N/A	North
40RAP BI#L1	63.4916	146.506	1811	granitoid	21.7 ± 0.3	22.1 ± 0.3	3 out of 9	0.22	54.4	N/A	N/A	N/A	N/A	North
39RAP BI#L1	63.5041	146.482	1806	granitoid	24.8 ± 0.1	25.0 ± 0.1	5 out of 10	1.01	76.1	N/A	N/A	N/A	N/A	North
43RAP BI#L1	63.4934	146.42	1679	granitoid	20.4 ± 0.2	20.5 ± 0.2	11 out of 14	0.38	91.1	N/A	N/A	N/A	N/A	North
59COL BI#L1	63.2277	145.333	1832	granitoid	119.1 ± 0.3	121.3 ± 0.5	7 out of 14	1.43	54.5	N/A	N/A	N/A	N/A	South
01HAJ BI#L1	63.5631	145.114	2125	granitoid	70.1 ± 0.7	70.6 ± 0.7	9 out of 12	0.31	92.2	N/A	N/A	N/A	N/A	North
*41NEN BI#L1	MSWD is >2.5 so does not meet the criteria of a plateau age so weighted average age applied
*10CH05B BI#L1	MSWD is >2.5 so does not meet the criteria of a plateau age so weighted average age applied
**10CH13 BI#L1	% gas release used for age determination is <50% so does not meet the criteria of a plateau age so weighted average age applied.
***10CH09 BI#L1	<3 consecutive steps so does not meet the criteria of a plateau age so weighted average age applied
15CSR06 BI#L1	% gas release used for age determination is <50% so does not meet the criteria of a plateau age so weighted average age applied.
*43DEB BI#L1	MSWD is >2.5 so does not meet the criteria of a plateau age so weighted average age applied
**** 22DEB BI#L1	8 single grain fusions, mixed population/generation of biotite, weighted average age applied.
**06BAL BI#L1	% gas release used for age determination is <50% so does not meet the criteria of a plateau age so weighted average age applied.
K-spar										Inverse Isochron			Supplemental	North or South of Denali Fault
	Location	(WGS84)	Elv. (m)	Rock Type	Integrated				% of 39Ar	Min Age (Ma)	40Ar/36/Ari	MSWD	# of Steps
Sample Name	Lat (°N)	Long (°W)			Age (Ma)	Min Age (Ma) Weighted Average	# of Steps	MSWD	Release	N/A	N/A	N/A	N/A
10CH08 FS#L1	63.5167	147.643	1726	granitoid	15.7 ± 0.5	8.9 ± 0.8*	5 out of 14	0.15	19.8	N/A	N/A	N/A	N/A	North
15CSR02 FS#L1	63.5181	147.569	1676.6	orthogneiss	18.3 ± 0.1	8.2 ± 0.3	2 out of 8	0.59	9.8	N/A	N/A	N/A	N/A	North
55SUS FS#L1	63.535	147.104	1850	granitoid	27.8 ± 0.5	9.5 ± 1.3	5 out of 19	0.55	25	N/A	N/A	N/A	N/A	North
60SUS FS#L1	63.5339	147.087	1737	granitoid	13.3 ± 0.5	7.4 ± 0.4	6 out of 19	0.57	49.1	N/A	N/A	N/A	N/A	North
67SUS FS#L1	63.5251	147.079	1624	granitoid	32.9 ± 0.5	31.9 ± 0.6	7 out of 19	1.05	32.4	N/A	N/A	N/A	N/A	South
10ANK002 FS#F1	63.7702	147.142	1533	granitoid	83.9 ± 0.4	31.3 ± 1.2	2 out of 36	0.2	1.5	N/A	N/A	N/A	N/A	North
10ANK003 FS#F1	63.7747	147.228	1781	granitoid	87.9 ± 0.5	23.9 ± 1.4	1 out of 35	N/A	1.2	N/A	N/A	N/A	N/A	North
*10CH08 FS#L1	low release sample-so actual uncertainty is likely greater than analytical uncertainty

## Sheet: This study--HO Ar
This study--HO Ar
18DEB HO#L1
Weighted average of J from standards = 3.497e-03 ± 6.374e-06 (1-sigma error)
Days since irradiation = 61
Laser Power	Cumulative	40Ar	±	39Ar	±	38Ar	±	37Ar	±	36Ar	±	% Atm.	±	Ca/K	±	Cl/K	±	40Ar*/39ArK	±	Age	±
(mW)	39Ar	mV	mV	mV	mV	mV	mV	mV	mV	mV	mV	40Ar								(Ma)	(Ma)
500	0.00506	65.9058	0.1999	0.3295	0.0158	0.7448	0.0181	0.0024	0.0637	0.1511	0.0098	67.48	4.41	13.1682	0.7282	0.45692	0.02488	65.3732	9.41827	371.03	48.31
750	0.01008	12.1552	0.1399	0.3275	0.0128	0.1783	0.0177	0.0032	0.0723	0.0715	0.0092	171.83	22.37	17.7945	0.81259	0.10437	0.0122	-26.8217	8.39719	-177.49	58.4
1000	0.01505	7.8286	0.15	0.3251	0.0199	0.2677	0.0152	0.0042	0.0959	0.0534	0.0126	197.3	47.67	24.0333	1.58544	0.16598	0.01436	-23.62	11.6366	-155.36	79.94
1250	0.02079	6.9426	0.1499	0.3778	0.0185	0.5592	0.0132	0.0078	0.0921	0.0673	0.0172	277.51	73.57	38.5081	1.96865	0.30639	0.01694	-33.0543	13.7571	-221.37	98.03
1500	0.03026	10.6563	0.2023	0.6257	0.0147	1.1444	0.0247	0.0164	0.0841	0.0605	0.0119	155.44	33.33	48.9372	1.19732	0.38556	0.01243	-9.60299	5.76418	-61.56	37.59
1750	0.05134	22.3163	0.1906	1.3948	0.0281	2.6054	0.0342	0.0411	0.1781	0.0811	0.0133	92.42	17.69	55.1873	1.16247	0.39641	0.00961	1.2367	2.8857	7.78	18.11
2000	0.10115	42.623	0.3416	3.2904	0.0444	5.3102	0.0315	0.0877	0.8255	0.1232	0.0096	68.61	6.72	49.8489	0.83555	0.34202	0.00508	4.13445	0.89067	25.87	5.53
2500	0.29493	126.682	0.6471	12.7478	0.1055	18.1039	0.1563	0.2658	1.662	0.1954	0.017	28.38	3.98	38.8246	0.40875	0.30012	0.00362	7.20245	0.40751	44.83	2.51
3000	0.57231	166.753	1.1658	18.2469	0.148	25.2338	0.1454	0.3812	2.8733	0.2408	0.0131	23.91	2.33	38.9088	0.43727	0.29227	0.00293	7.03535	0.23255	43.8	1.43
3500	0.72721	93.5363	0.4003	10.2324	0.0742	14.7771	0.1031	0.2727	1.4129	0.1672	0.0142	28.89	4.52	49.8293	0.45252	0.30654	0.00311	6.60377	0.42421	41.14	2.61
4000	0.82839	64.1489	0.2822	6.7037	0.0559	10.2056	0.0684	0.2068	1.2963	0.103	0.0188	20.93	8.69	57.8582	0.61721	0.32436	0.0035	7.7115	0.85168	47.95	5.23
5000	0.91039	63.1237	0.2045	5.4182	0.0458	9.1621	0.0461	0.1464	0.6112	0.1147	0.0149	34.68	6.99	50.527	0.4858	0.35927	0.00356	7.73843	0.83133	48.12	5.1
6000	0.97512	59.8343	0.1276	4.2709	0.0439	7.8515	0.0334	0.1062	0.3077	0.0697	0.0159	19.82	7.86	46.4234	0.5051	0.39039	0.00437	11.4097	1.125	70.51	6.82
8000	1	28.198	0.1767	1.6506	0.0192	3.0606	0.0338	0.0542	0.2104	0.0285	0.0127	14.07	13.34	61.7334	0.77416	0.39613	0.00639	15.0041	2.33875	92.16	14
Integrated		770.704	1.551	65.941	0.224	99.2044	0.2628	1.5959	3.9943	1.5276	0.052	41.6	2	45.1789	0.19396	0.31858	0.00138	6.92656	0.23935	43.13	1.47
67SUS HO#L1
Weighted average of J from standards = 3.908e-03 ± 1.404e-05 (1-sigma error)
Days since irradiation = 51
Laser Power	Cumulative	40Ar	±	39Ar	±	38Ar	±	37Ar	±	36Ar	±	% Atm.	±	Ca/K	±	Cl/K	±	40Ar*/39ArK	±	Age	±
(mW)	39Ar	mV	mV	mV	mV	mV	mV	mV	mV	mV	mV	40Ar								(Ma)	(Ma)
500	0.00945	3349.13	8.6562	4.5352	0.0348	2.5973	0.025	0.0085	0.0959	10.2428	0.0598	90.36	0.58	3.43371	0.04698	0.02947	0.00129	71.3023	4.37777	442.97	24.11
750	0.01849	215.633	0.8745	4.3415	0.039	0.3525	0.0179	0.0129	0.1195	0.6386	0.0222	87.08	3.06	5.4634	0.07066	0.00914	0.0009	6.42768	1.52665	44.71	10.49
1000	0.03954	200.53	0.592	10.1511	0.0479	0.7325	0.017	0.0887	0.5125	0.4728	0.0234	66.13	3.46	16.1298	0.12112	0.01131	0.00037	6.72189	0.68913	46.73	4.73
1250	0.12724	590.714	3.0402	42.305	0.213	4.8397	0.0211	0.3907	1.7761	0.8078	0.0356	35.03	1.8	17.0547	0.11645	0.02134	0.00016	9.1122	0.26488	63.06	1.8
1500	0.23966	669.114	5.5202	54.1654	0.4748	5.2493	0.0479	0.414	3.5417	0.7292	0.0238	27.17	1.08	14.0989	0.17364	0.01782	0.00026	9.02397	0.18406	62.46	1.25
1750	0.34608	660.228	4.996	51.2669	0.3836	7.9838	0.0715	0.3763	2.9551	0.6421	0.0319	24.1	1.44	13.5384	0.14761	0.03027	0.00038	9.80341	0.22181	67.75	1.5
2000	0.45091	642.445	4.7994	50.5088	0.3287	7.21	0.0557	0.3833	2.7964	0.6038	0.0293	22.91	1.36	13.998	0.1376	0.02756	0.0003	9.83576	0.20719	67.97	1.41
2500	0.61683	996.158	7.2634	79.954	0.6344	12.4925	0.1123	0.6218	4.7412	0.8743	0.0266	20.84	0.81	14.3491	0.15877	0.03045	0.00039	9.89363	0.15622	68.36	1.06
3000	0.75034	799.778	6.4834	64.329	0.5158	8.7053	0.0459	0.4903	3.5298	0.748	0.0295	22.64	1.11	14.0597	0.15233	0.026	0.00027	9.64734	0.18684	66.69	1.27
5000	0.91767	973.258	6.7005	80.6216	0.6352	10.1115	0.0605	0.6147	4.1022	0.8621	0.0272	21.02	0.84	14.0645	0.146	0.02395	0.00026	9.56255	0.15103	66.12	1.03
9000	1	530.385	2.5462	39.6936	0.2365	5.4792	0.0408	0.334	1.6663	0.5699	0.028	26.62	1.57	15.5302	0.12142	0.02649	0.00028	9.84182	0.22742	68.01	1.54
Integrated		9627.38	17.6047	481.872	1.288	65.7536	0.1796	3.735	9.3317	17.1915	0.1069	49.64	0.34	14.3002	0.05261	0.0253	0.00011	10.1014	0.08022	69.77	0.6
15CSR14 HO#L1
Weighted average of J from standards = 4.969e-03 ± 1.797e-05 (1-sigma error)
Days since irradiation = 55
Laser Power	Cumulative	40Ar	±	39Ar	±	38Ar	±	37Ar	±	36Ar	±	% Atm.	±	Ca/K	±	Cl/K	±	40Ar*/39ArK	±	Age	±
(mW)	39Ar	mV	mV	mV	mV	mV	mV	mV	mV	mV	mV	40Ar								(Ma)	(Ma)
500	0.00143	599.704	0.4866	0.3448	0.0162	1.041	0.0221	0.0028	0.0808	1.8084	0.0387	89.07	1.91	15.1713	0.8396	0.42853	0.02479	191.183	34.6159	1203.44	158.96
1000	0.0045	279.838	0.4024	0.7364	0.0301	0.4463	0.0126	0.0037	0.0883	0.8239	0.0334	86.9	3.53	9.13038	0.43543	0.0815	0.00528	49.9389	13.619	399.44	97.7
1500	0.02551	129.552	0.3689	5.049	0.0504	0.9141	0.0194	0.0312	0.2283	0.3071	0.021	68.15	4.79	11.3951	0.14162	0.03366	0.0009	8.19934	1.23668	71.96	10.64
2000	0.3411	500.872	0.5402	75.8177	0.2036	8.926	0.0505	0.4339	3.2555	0.4716	0.0256	20.77	1.52	10.5426	0.08436	0.02245	0.00016	5.23163	0.10149	46.25	0.89
2500	0.75553	560.599	0.6075	99.5598	0.36	10.8448	0.0742	0.5633	3.5295	0.446	0.0286	15.31	1.52	10.423	0.07571	0.02066	0.00018	4.76273	0.08726	42.15	0.76
3000	0.83468	119.007	0.2199	19.0153	0.0961	2.1631	0.0238	0.1084	0.5371	0.0974	0.0203	16.77	5.06	10.5002	0.07463	0.02165	0.00029	5.20532	0.31785	46.02	2.77
5000	0.92989	138.219	0.2867	22.8735	0.138	2.6265	0.015	0.1304	0.902	0.1129	0.021	16.43	4.51	10.5016	0.09679	0.02189	0.0002	5.04543	0.27438	44.62	2.4
9000	1	114.378	0.3389	16.8443	0.0862	1.9934	0.0297	0.0991	0.4865	0.1188	0.0241	23.65	6.25	10.8433	0.07719	0.02255	0.00039	5.18353	0.42546	45.83	3.71
Integrated		2442.17	1.2005	240.241	0.4588	28.9552	0.1037	1.3728	4.9458	4.1862	0.0772	46.15	0.94	10.527	0.0431	0.0226	0.0001	5.47998	0.09607	48.41	0.86
15CSR12 HO#L1
Weighted average of J from standards = 4.969e-03 ± 1.797e-05 (1-sigma error)
Days since irradiation = 55
Laser Power	Cumulative	40Ar	±	39Ar	±	38Ar	±	37Ar	±	36Ar	±	% Atm.	±	Ca/K	±	Cl/K	±	40Ar*/39ArK	±	Age	±
(mW)	39Ar	mV	mV	mV	mV	mV	mV	mV	mV	mV	mV	40Ar								(Ma)	(Ma)
500	0.00172	291.878	0.4943	0.1571	0.0173	0.4421	0.0216	0.0013	0.041	0.848	0.0187	85.81	1.9	15.2152	1.7561	0.37912	0.05133	265.101	46.1084	1514.43	178.17
1000	0.00549	103.689	0.2848	0.3478	0.0133	0.1923	0.0134	0.0072	0.0992	0.2997	0.0188	84.84	5.37	38.6278	1.59353	0.08156	0.00909	45.8519	16.3419	369.88	119.18
1500	0.01676	48.1539	0.2317	1.0327	0.026	0.2172	0.0213	0.0109	0.1418	0.1294	0.0186	77.59	11.45	19.5263	0.55743	0.03746	0.00453	10.5209	5.38225	91.83	45.8
2000	0.32365	238.484	0.3196	28.1476	0.1142	7.3747	0.0659	0.3343	2.7599	0.5369	0.0191	55.16	2.37	21.9745	0.20388	0.05267	0.00054	3.81764	0.20301	33.86	1.78
2500	0.74302	175.739	0.3638	38.4601	0.1301	9.6556	0.048	0.4503	2.5846	0.2325	0.0241	18.09	4.08	21.6619	0.14554	0.05086	0.00032	3.74984	0.18743	33.27	1.65
3000	0.88203	56.7543	0.244	12.7458	0.0794	3.1032	0.0259	0.1458	0.9222	0.0864	0.0176	23.97	9.24	21.1634	0.18946	0.04921	0.00054	3.39041	0.413	30.11	3.64
5000	0.94285	27.6689	0.1494	5.576	0.0534	1.2633	0.0393	0.0634	0.3935	0.049	0.0115	33.67	12.31	21.0437	0.24207	0.04555	0.00156	3.29855	0.61364	29.3	5.41
9000	1	25.9423	0.1142	5.2475	0.0392	1.2842	0.0227	0.0705	0.381	0.0362	0.0179	18.97	20.45	24.8857	0.2315	0.04957	0.001	4.01997	1.01553	35.64	8.92
Integrated		968.309	0.8418	91.7146	0.2045	23.5325	0.1024	1.0837	3.9344	2.2181	0.0525	58.63	1.61	21.864	0.09394	0.05132	0.00027	4.39247	0.17112	38.91	1.51
15CSR10 HO#L1
Weighted average of J from standards = 4.969e-03 ± 1.797e-05 (1-sigma error)
Days since irradiation = 56
Laser Power	Cumulative	40Ar	±	39Ar	±	38Ar	±	37Ar	±	36Ar	±	% Atm.	±	Ca/K	±	Cl/K	±	40Ar*/39ArK	±	Age	±
(mW)	39Ar	mV	mV	mV	mV	mV	mV	mV	mV	mV	mV	40Ar								(Ma)	(Ma)
500	0.00465	348.932	0.4912	2.546	0.0413	0.7312	0.0481	0.0028	0.0809	0.4365	0.0221	36.91	1.87	2.03601	0.06713	0.05144	0.00408	86.5185	2.93128	644.43	18.36
1000	0.04596	166.852	0.2967	22.6002	0.1318	0.5401	0.0189	0.0157	0.2265	0.1835	0.0222	31.86	3.94	1.27837	0.01986	0.00252	0.00018	5.01311	0.29173	44.34	2.55
1500	0.11743	148.739	0.2957	39.1326	0.2169	1.0657	0.0283	0.0736	0.5172	0.1045	0.0189	16.81	3.79	3.45615	0.03097	0.00345	0.00016	3.14144	0.14445	27.91	1.27
2000	0.50168	780.999	0.733	210.671	0.7544	8.3359	0.0469	0.7714	5.3413	0.4033	0.0299	7.17	1.14	6.73569	0.05264	0.0061	6e-05	3.42258	0.044	30.39	0.39
2500	0.80109	580.104	0.6271	164.144	0.4806	6.1042	0.0622	0.5917	3.5504	0.2971	0.0162	6.78	0.83	6.6308	0.04439	0.00561	8e-05	3.27516	0.03107	29.09	0.27
3000	0.90305	198.435	0.1892	55.8625	0.2255	1.754	0.031	0.153	1.0825	0.0713	0.019	4.3	2.86	5.03442	0.04109	0.00439	0.00012	3.37778	0.10195	29.99	0.9
5000	0.946	80.7572	0.2654	23.5348	0.1502	0.7217	0.0183	0.0669	0.4822	0.0528	0.0159	12.62	5.86	5.22549	0.0504	0.0042	0.00017	2.97857	0.20103	26.48	1.77
9000	1	98.2135	0.2734	29.5952	0.117	0.8937	0.017	0.0923	0.5965	0.0632	0.0202	11.36	6.14	5.73627	0.04355	0.00411	0.00012	2.92161	0.20292	25.97	1.79
Integrated		2403.03	1.2362	548.086	0.9763	20.1466	0.1055	1.7674	6.5742	1.6122	0.0593	13.86	0.73	5.93032	0.02451	0.00546	4e-05	3.75994	0.03284	33.36	0.31
86SUS HO#L1
Weighted average of J from standards = 3.041e-03 ± 8.696e-06 (1-sigma error)
Days since irradiation = 80
Laser Power	Cumulative	40Ar	±	39Ar	±	38Ar	±	37Ar	±	36Ar	±	% Atm.	±	Ca/K	±	Cl/K	±	40Ar*/39ArK	±	Age	±
(mW)	39Ar	mV	mV	mV	mV	mV	mV	mV	mV	mV	mV	40Ar								(Ma)	(Ma)
500	0.00025	457.215	0.7919	0.1265	0.0299	1.2542	0.025	0.0014	0.1381	1.0978	0.0271	70.92	1.76	20.7187	5.34297	1.75303	0.41741	1059.14	260.588	2595.05	338.33
1000	0.00124	298.15	0.5551	0.4972	0.0286	0.8902	0.0213	0.0048	0.145	0.8057	0.027	79.73	2.68	17.9938	1.17643	0.31244	0.02037	122.404	17.7101	570.25	70.73
1500	0.00288	261.31	0.5398	0.8221	0.0326	0.6124	0.0212	0.007	0.1514	0.7575	0.0265	85.45	3	15.7209	0.7138	0.11891	0.00736	46.539	9.78348	238.53	46.97
2000	0.005	158.818	0.4223	1.0654	0.0219	0.4514	0.025	0.0106	0.1642	0.4739	0.0236	87.64	4.4	18.395	0.47605	0.06994	0.00524	18.5578	6.61634	98.93	34.32
2500	0.01139	154.688	0.4723	3.2089	0.0638	0.7526	0.0223	0.0287	0.2556	0.3133	0.0262	58.35	5.02	16.5409	0.36272	0.04362	0.00176	20.1918	2.4704	107.39	12.75
3000	0.05503	311.628	0.4972	21.8999	0.0886	3.0663	0.0434	0.1848	0.7078	0.317	0.0231	25.23	2.2	15.5727	0.08728	0.02691	0.00044	10.6815	0.31781	57.61	1.69
5000	0.72517	2944.24	5.7759	336.284	0.4106	45.7547	0.08	2.78	3.3426	1.7098	0.0421	9.41	0.42	15.2576	0.0263	0.02644	6e-05	7.95114	0.04215	43.05	0.23
9000	1	1172.89	2.1889	137.896	0.2349	19.7547	0.1097	1.1182	1.8957	0.667	0.0256	8.98	0.65	14.965	0.03617	0.02796	0.00018	7.75965	0.05894	42.03	0.32
Integrated		5758.94	6.3268	501.8	0.4888	72.5366	0.1515	4.1356	3.9272	6.1419	0.0798	25.66	0.41	15.2106	0.02081	0.02795	7e-05	8.55935	0.04968	46.31	0.3
90CSUS HO#L1
Weighted average of J from standards = 3.041e-03 ± 8.696e-06 (1-sigma error)
Days since irradiation = 80
Laser Power	Cumulative	40Ar	±	39Ar	±	38Ar	±	37Ar	±	36Ar	±	% Atm.	±	Ca/K	±	Cl/K	±	40Ar*/39ArK	±	Age	±
(mW)	39Ar	mV	mV	mV	mV	mV	mV	mV	mV	mV	mV	40Ar								(Ma)	(Ma)
500	0.00071	499.581	0.7538	0.7693	0.0427	0.7211	0.019	0.0015	0.103	0.3557	0.018	21.01	1.06	3.6904	0.32053	0.17677	0.01125	513.643	29.4001	1695.36	62.89
1000	0.00355	300.115	0.5	3.0844	0.032	0.9748	0.0396	0.0034	0.1158	0.1543	0.0168	15.1	1.66	2.03599	0.07213	0.06227	0.00279	82.6456	1.83461	404.03	8.03
1500	0.00912	165.14	0.3274	6.0537	0.0575	1.3767	0.0639	0.0071	0.4952	0.0971	0.0341	17.04	6.11	2.16686	0.15174	0.04499	0.00227	22.6247	1.6807	119.91	8.62
2000	0.01843	137.501	0.4123	10.1106	0.0601	4.4651	0.0273	0.0247	0.1892	0.0708	0.0199	13.76	4.29	4.48311	0.04359	0.09046	0.00079	11.7228	0.58868	63.12	3.12
2500	0.04898	315.021	0.5098	33.241	0.1476	21.1817	0.0653	0.1305	0.4025	0.1668	0.0173	12.27	1.63	7.22403	0.03917	0.13184	0.00073	8.31078	0.15921	44.98	0.85
3000	0.15283	945.526	1.3825	113.025	0.2204	79.7891	0.2511	0.499	1.278	0.2913	0.0188	4.77	0.59	8.12669	0.02624	0.14647	0.00055	7.96314	0.05323	43.12	0.28
5000	0.61418	4127.07	10.1274	502.092	0.6348	350.164	0.7777	2.2172	2.6307	1.1952	0.0344	4.14	0.25	8.12791	0.01414	0.14468	0.00038	7.87526	0.03038	42.65	0.16
9000	1	3320.09	8.1656	419.749	0.4905	255.728	0.3626	1.636	2.1748	0.9614	0.019	4.51	0.17	7.17136	0.01273	0.12605	0.00024	7.54534	0.02529	40.88	0.14
Integrated		9810.04	13.1343	1088.13	0.8508	714.4	0.9002	4.5195	3.7082	3.2926	0.0661	6.14	0.2	7.64352	0.00869	0.13601	0.00021	8.45895	0.02269	45.77	0.18
32RAP HO#L1
Weighted average of J from standards = 3.415e-03 ± 1.053e-05 (1-sigma error)
Days since irradiation = 37
Laser Power	Cumulative	40Ar	±	39Ar	±	38Ar	±	37Ar	±	36Ar	±	% Atm.	±	Ca/K	±	Cl/K	±	40Ar*/39ArK	±	Age	±
(mW)	39Ar	mV	mV	mV	mV	mV	mV	mV	mV	mV	mV	40Ar								(Ma)	(Ma)
400	0.00282	372.982	2.0339	1.669	0.0637	0.6923	0.0198	0.0055	0.048	0.8833	0.0241	69.87	1.95	6.06771	0.23806	0.06433	0.0036	67.48	5.14285	373.74	25.72
600	0.01405	114.39	1.9433	6.6323	0.0748	0.4562	0.021	0.0093	0.0911	0.2182	0.0132	55.79	3.56	2.5662	0.03843	0.01099	0.00068	7.61997	0.66513	46.3	3.99
800	0.03779	83.2596	1.7711	14.0125	0.0805	0.9537	0.0228	0.0047	0.0786	0.0643	0.0141	22.48	5.05	0.61325	0.01089	0.01193	0.00035	4.58396	0.32406	27.99	1.96
1000	0.07475	127.834	1.7581	21.8214	0.1241	1.3403	0.025	0.0087	0.1096	0.1051	0.0353	23.84	8.2	0.73307	0.01012	0.01052	0.00026	4.43995	0.48491	27.12	2.94
1200	0.10181	80.1864	1.6602	15.9786	0.147	1.1817	0.0258	0.0129	0.098	0.0223	0.0138	6.92	5.1	1.48529	0.01772	0.0133	0.00037	4.64619	0.27831	28.37	1.69
1400	0.1322	101.035	1.4169	17.9533	0.1248	1.8193	0.0174	0.0322	0.157	0.0145	0.014	1.62	4.11	3.29015	0.02799	0.0191	0.00025	5.51435	0.24679	33.62	1.49
1600	0.16889	156.203	0.7969	21.7296	0.0757	4.0635	0.0344	0.1071	0.2775	0.0809	0.0191	9.69	3.62	9.07856	0.03954	0.03712	0.00036	6.48793	0.2639	39.49	1.59
1800	0.23036	240.39	1.0185	36.4555	0.184	8.8703	0.0607	0.2488	1.4532	0.136	0.017	8.23	2.09	12.5818	0.0976	0.04908	0.00044	6.0537	0.14434	36.88	0.87
2000	0.31761	337.515	1.6099	51.7527	0.2884	13.9216	0.1091	0.3716	2.2708	0.1665	0.0178	5.53	1.57	13.2437	0.11007	0.05454	0.00055	6.16465	0.11254	37.55	0.68
2500	0.45509	487.51	3.1334	81.4139	0.5717	17.8589	0.1408	0.3985	2.9046	0.2254	0.0191	6.96	1.16	9.01205	0.09153	0.04398	0.00049	5.56306	0.08879	33.92	0.54
4000	0.88478	1494.08	12.4544	254.391	2.2377	52.8389	0.4042	1.1506	9.1417	0.5316	0.0182	4.19	0.36	8.32528	0.099	0.04153	0.00051	5.61678	0.07316	34.24	0.44
9000	1	433.732	1.7208	68.1951	0.3701	11.957	0.0828	0.2762	1.3928	0.2122	0.0203	9.25	1.39	7.4537	0.05538	0.03466	0.00032	5.76136	0.09714	35.11	0.59
Integrated		4029.12	13.8225	592.005	2.3797	115.954	0.458	2.6261	10.0676	2.6603	0.0683	14.2	0.51	8.16488	0.0455	0.03894	0.00023	5.83232	0.04772	35.54	0.31
41RAP HO#L1
Weighted average of J from standards = 3.041e-03 ± 8.696e-06 (1-sigma error)
Days since irradiation = 80
Laser Power	Cumulative	40Ar	±	39Ar	±	38Ar	±	37Ar	±	36Ar	±	% Atm.	±	Ca/K	±	Cl/K	±	40Ar*/39ArK	±	Age	±
(mW)	39Ar	mV	mV	mV	mV	mV	mV	mV	mV	mV	mV	40Ar								(Ma)	(Ma)
500	0.00164	462.263	0.5745	1.1934	0.0408	0.6976	0.0217	0.0025	0.1034	1.0738	0.0191	68.6	1.23	3.83023	0.20661	0.08539	0.00491	121.787	6.33812	567.78	25.35
1000	0.00618	160.159	0.4314	3.3027	0.0404	0.765	0.0292	0.0053	0.1302	0.2652	0.0223	48.69	4.11	2.92047	0.08081	0.04337	0.00196	24.8946	2.02248	131.51	10.3
1500	0.01551	102.577	0.4077	6.7892	0.0525	1.1943	0.0177	0.0097	0.13	0.1165	0.0153	32.85	4.42	2.63133	0.04066	0.03413	0.00062	10.1366	0.67437	54.71	3.59
2000	0.03273	142.125	0.4846	12.5401	0.0526	4.1879	0.0195	0.0297	0.2126	0.0986	0.0207	18.83	4.32	4.35575	0.03619	0.06777	0.00044	9.19078	0.49225	49.68	2.62
2500	0.06839	219.089	0.4641	25.9844	0.0571	12.0003	0.0724	0.0831	0.454	0.1125	0.0198	12.08	2.68	5.88013	0.03471	0.09488	0.00062	7.40329	0.22678	40.12	1.22
3000	0.21329	798.944	1.6865	105.704	0.2459	69.6512	0.1706	0.5178	0.7547	0.2594	0.0189	4.27	0.7	9.0191	0.02484	0.13662	0.00047	7.23226	0.05788	39.2	0.31
5000	0.7398	2792.65	4.7483	384.049	0.7098	245.617	0.3626	1.8448	2.2269	0.9882	0.024	5.03	0.26	8.84369	0.01959	0.13252	0.00032	6.90106	0.02575	37.43	0.14
9000	1	1566.6	3.0775	189.695	0.3623	89.361	0.2166	0.7635	1.8265	0.4432	0.0219	4.36	0.42	7.40631	0.02274	0.09697	0.00031	7.89273	0.04087	42.74	0.22
Integrated		6244.41	5.9995	729.258	0.8412	423.474	0.4634	3.2563	3.0266	3.3573	0.0577	11.63	0.27	8.21906	0.01221	0.12001	0.00019	7.56459	0.02638	40.99	0.18

## Sheet: This study--BI Ar
This study--BI Ar
45NEN BI#L1
Weighted average of J from standards = 3.560e-03 ± 8.734e-06 (1-sigma error)
Days since irradiation = 149
Laser Power	Cumulative	40Ar	±	39Ar	±	38Ar	±	37Ar	±	36Ar	±	% Atm.	±	Ca/K	±	Cl/K	±	40Ar*/39ArK	±	Age	±
(mW)	39Ar	mV	mV	mV	mV	mV	mV	mV	mV	mV	mV	40Ar								(Ma)	(Ma)
400	0.0052	280.784	1.7507	8.9812	0.077	0.6738	0.0171	0.0018	0.304	0.9234	0.021	97.22	2.29	0.37587	0.06221	0.00953	0.00042	0.86849	0.71696	5.56	4.59
600	0.01279	175.304	0.6217	13.1048	0.057	0.9021	0.0188	0.0007	0.2661	0.4595	0.0193	77.6	3.28	0.09411	0.03726	0.01089	0.00031	2.98996	0.43849	19.08	2.78
800	0.03326	287.96	0.7851	35.3296	0.1285	2.6864	0.0318	0.0005	0.2955	0.3499	0.0193	36.03	1.99	0.02635	0.01535	0.01339	0.0002	5.19531	0.16395	33.02	1.03
1000	0.07602	484.881	2.5336	73.8195	0.4149	5.6749	0.0351	0.0008	0.2902	0.2116	0.0155	12.94	0.95	0.0188	0.00721	0.01384	0.00013	5.69255	0.07771	36.15	0.49
1250	0.14723	764.882	2.566	122.918	0.5836	9.5332	0.0527	0.0008	0.3072	0.1377	0.0166	5.34	0.64	0.01129	0.00459	0.01405	0.00012	5.86242	0.05302	37.22	0.33
1500	0.21327	708.82	1.5363	114.001	0.3076	8.8957	0.0326	0.0007	0.2679	0.0729	0.0158	3.05	0.66	0.012	0.00431	0.01417	7e-05	5.99944	0.04614	38.08	0.29
1750	0.27414	662.454	1.4837	105.081	0.2584	8.203	0.0593	0.0014	0.2805	0.098	0.0172	4.38	0.77	0.02379	0.0049	0.01416	0.00013	5.99998	0.05256	38.08	0.33
2000	0.3286	589.522	1.4048	94.0131	0.3524	7.4078	0.0333	0.0011	0.2089	0.0492	0.0148	2.46	0.74	0.02112	0.00408	0.01433	0.0001	6.08722	0.05395	38.63	0.34
2500	0.41609	934.115	2.4498	151.027	0.4753	11.7677	0.1003	0.0029	0.3182	0.0784	0.0111	2.47	0.35	0.03514	0.00387	0.01415	0.00015	6.00358	0.03314	38.11	0.21
3000	0.52002	1090.93	4.6596	179.417	0.9299	13.9463	0.1124	0.0051	0.332	0.0565	0.0121	1.5	0.33	0.05214	0.00341	0.01412	0.00016	5.96012	0.0451	37.83	0.28
3500	0.71844	2060.68	9.1424	342.548	1.2771	26.6156	0.1219	0.0227	0.4333	0.0678	0.0117	0.89	0.17	0.12152	0.00237	0.01412	0.0001	5.93333	0.03617	37.67	0.23
4500	0.91609	2039.74	8.3616	341.208	1.4865	26.8103	0.126	0.0411	0.9348	0.0611	0.0115	0.72	0.17	0.22129	0.00512	0.0143	0.00011	5.90582	0.03698	37.49	0.23
6000	0.97737	636.66	1.411	105.806	0.3164	8.3832	0.0313	0.019	0.3773	0.0452	0.0117	1.86	0.55	0.32961	0.00662	0.01443	8e-05	5.87679	0.03956	37.31	0.25
8000	1	236.313	1.6748	39.0654	0.277	3.1693	0.0448	0.0057	0.2327	0.0317	0.0106	3.78	1.33	0.26756	0.0111	0.01482	0.00027	5.79236	0.09965	36.78	0.63
Integrated		10953	14.4781	1726.32	2.4356	134.669	0.2603	0.1042	1.4467	2.6431	0.057	7.09	0.15	0.1108	0.00155	0.01413	4e-05	5.86783	0.01533	37.25	0.13
43NEN BI#L1
Weighted average of J from standards = 3.560e-03 ± 8.734e-06 (1-sigma error)
Days since irradiation = 149
Laser Power	Cumulative	40Ar	±	39Ar	±	38Ar	±	37Ar	±	36Ar	±	% Atm.	±	Ca/K	±	Cl/K	±	40Ar*/39ArK	±	Age	±
(mW)	39Ar	mV	mV	mV	mV	mV	mV	mV	mV	mV	mV	40Ar								(Ma)	(Ma)
400	0.04513	454.936	1.2679	10.3665	0.0513	1.0592	0.0164	0.0015	0.2236	1.4719	0.0177	95.65	1.18	0.25668	0.0396	0.01369	0.00035	1.90917	0.51817	12.21	3.3
600	0.1049	222.648	1.3809	13.7273	0.0884	1.2219	0.0189	0.0003	0.1856	0.5195	0.0173	69.06	2.34	0.03477	0.02481	0.01501	0.00031	5.00924	0.38764	31.85	2.44
800	0.18553	219.662	2.1015	18.519	0.2056	1.7015	0.0209	0.0005	0.171	0.3619	0.0179	48.79	2.46	0.05032	0.01695	0.01634	0.00032	6.05888	0.31519	38.45	1.98
1000	0.27281	243.935	2.3257	20.0476	0.2137	1.8056	0.0171	0.0007	0.2324	0.4097	0.0161	49.73	2.02	0.06507	0.02129	0.01592	0.00027	6.10159	0.27249	38.72	1.71
1250	0.35704	244.931	2.1689	19.3455	0.189	1.7461	0.0272	0.0007	0.2099	0.4252	0.0174	51.39	2.16	0.0645	0.01992	0.0159	0.00035	6.13988	0.29518	38.96	1.85
1500	0.44659	260.937	2.2571	20.5686	0.2297	1.8956	0.0223	0.001	0.2097	0.4462	0.0151	50.62	1.77	0.08574	0.01873	0.01631	0.00031	6.24952	0.25314	39.65	1.59
1750	0.53521	254.756	2.2114	20.3538	0.1752	1.8416	0.0165	0.0011	0.2257	0.4349	0.0124	50.53	1.51	0.09519	0.02036	0.01597	0.00023	6.17718	0.21702	39.2	1.36
2000	0.6147	216.517	1.8877	18.2593	0.1954	1.6271	0.0223	0.0009	0.2076	0.3239	0.0107	44.29	1.52	0.08994	0.02089	0.01583	0.00032	6.59017	0.21423	41.79	1.34
2500	0.76414	316.976	2.2225	34.3233	0.2617	2.9721	0.0334	0.0018	0.2556	0.3432	0.0103	32.05	0.99	0.094	0.01369	0.0156	0.00025	6.25499	0.11953	39.69	0.75
3000	0.88642	209.193	1.9033	28.0872	0.2758	2.3315	0.0333	0.0015	0.2051	0.1076	0.009	15.19	1.29	0.10013	0.01343	0.01509	0.0003	6.29149	0.1323	39.91	0.83
3500	0.93437	81.4578	1.4509	11.0122	0.1804	0.9017	0.0253	0.0007	0.2926	0.0351	0.0101	12.7	3.69	0.12137	0.0488	0.01488	0.00056	6.43234	0.31939	40.8	2
4500	0.96675	56.8148	1.0256	7.4373	0.1314	0.5965	0.0203	0.0016	0.3152	0.0189	0.0099	9.62	5.16	0.38752	0.07808	0.01455	0.00065	6.87873	0.43336	43.6	2.71
6000	0.98941	40.4807	0.7899	5.2074	0.1093	0.4524	0.0155	0.001	0.1974	0.0257	0.0129	18.66	9.43	0.34715	0.06997	0.01586	0.00074	6.29957	0.75707	39.97	4.75
8000	1	21.2795	0.4492	2.4314	0.0592	0.2147	0.0143	0.0003	0.2641	0.0086	0.011	11.82	15.35	0.22829	0.19944	0.01621	0.00133	7.69186	1.36497	48.68	8.52
Integrated		2844.52	6.6435	229.686	0.6823	20.3672	0.0841	0.0134	0.8665	4.9323	0.0517	51.32	0.55	0.10704	0.00693	0.01559	9e-05	6.01415	0.07467	38.17	0.48
41NEN BI#L1
Weighted average of J from standards = 3.497e-03 ± 6.374e-06 (1-sigma error)
Days since irradiation = 84
Laser Power	Cumulative	40Ar	±	39Ar	±	38Ar	±	37Ar	±	36Ar	±	% Atm.	±	Ca/K	±	Cl/K	±	40Ar*/39ArK	±	Age	±
(mW)	39Ar	mV	mV	mV	mV	mV	mV	mV	mV	mV	mV	40Ar								(Ma)	(Ma)
400	0.00444	638.933	2.207	8.6419	0.0488	1.0723	0.0223	0.002	0.0655	2.1742	0.0144	100.57	0.75	0.43312	0.01413	0.01399	0.00055	-0.42094	0.55604	-2.65	3.51
600	0.01145	375.173	1.2188	13.6423	0.082	1.199	0.0145	0.001	0.0908	1.1708	0.0168	92.3	1.36	0.1382	0.01224	0.0129	0.00025	2.11658	0.37469	13.29	2.34
800	0.02523	502.663	1.5258	26.7932	0.1075	2.2847	0.0284	0.001	0.0889	1.2867	0.0245	75.75	1.46	0.06652	0.00609	0.01383	0.00023	4.54304	0.27694	28.41	1.72
1000	0.05652	597.966	1.7344	60.8727	0.1315	4.9298	0.0447	0.0009	0.0583	0.8623	0.0144	42.73	0.72	0.0263	0.00176	0.01426	0.00016	5.60883	0.07644	35.01	0.47
1250	0.12023	935.018	3.9036	123.933	0.5065	9.8995	0.0596	0.0011	0.0725	0.7452	0.0145	23.63	0.47	0.01614	0.00107	0.01435	0.00012	5.73885	0.0524	35.81	0.32
1500	0.20721	1216.53	3.9861	169.201	0.722	13.7685	0.113	0.0012	0.0799	0.758	0.017	18.48	0.42	0.01265	0.00087	0.01472	0.00016	5.83691	0.04544	36.41	0.28
1750	0.28692	1069.9	1.7163	155.061	0.1969	12.6104	0.0322	0.0012	0.0734	0.5079	0.014	14.08	0.39	0.01412	0.00087	0.01476	5e-05	5.90285	0.02988	36.82	0.18
2000	0.3536	878.791	2.7068	129.731	0.3777	10.376	0.079	0.0013	0.0789	0.3439	0.013	11.6	0.44	0.01873	0.00112	0.0145	0.00014	5.96184	0.04027	37.19	0.25
2500	0.43635	1159.15	2.0694	160.976	0.2222	12.9716	0.0657	0.0026	0.0921	0.5746	0.0184	14.69	0.47	0.02957	0.00105	0.01459	9e-05	6.11766	0.03718	38.15	0.23
3000	0.5209	1122.3	1.959	164.463	0.3045	13.1801	0.0585	0.0035	0.1095	0.4011	0.0156	10.58	0.41	0.0388	0.00122	0.01454	8e-05	6.07554	0.03244	37.89	0.2
3500	0.60179	1016.07	1.7205	157.359	0.2539	12.5213	0.0436	0.0036	0.1248	0.2144	0.0273	6.24	0.8	0.04218	0.00146	0.01446	6e-05	6.02661	0.05333	37.59	0.33
4500	0.79085	2307.29	9.032	367.793	1.1715	29.4133	0.1429	0.0189	0.1468	0.3176	0.0126	4.02	0.16	0.09418	0.00079	0.01457	0.0001	5.9929	0.03277	37.38	0.2
6000	0.86458	885.507	2.6209	143.447	0.4567	11.5206	0.0513	0.0108	0.1304	0.1372	0.0153	4.5	0.51	0.1387	0.00173	0.01464	9e-05	5.86717	0.04106	36.6	0.25
8000	0.945	965.153	2.1171	156.45	0.4935	12.7573	0.0593	0.0152	0.1508	0.1461	0.0124	4.36	0.38	0.17835	0.00186	0.0149	0.0001	5.87189	0.03277	36.63	0.2
8001	1	655.486	1.9874	107.006	0.2706	8.7735	0.043	0.0221	0.2225	0.0754	0.0115	3.14	0.52	0.37832	0.00394	0.015	0.0001	5.90555	0.03969	36.84	0.25
Integrated		14325.9	12.6906	1945.37	1.7611	157.278	0.2553	0.0864	0.4404	9.7156	0.0646	20.07	0.13	0.08146	0.00042	0.01459	3e-05	5.86247	0.01293	36.57	0.1
02NEN BI#L1
Weighted average of J from standards = 3.301e-03 ± 8.614e-06 (1-sigma error)
Days since irradiation = 31
Laser Power	Cumulative	40Ar	±	39Ar	±	38Ar	±	37Ar	±	36Ar	±	% Atm.	±	Ca/K	±	Cl/K	±	40Ar*/39ArK	±	Age	±
(mW)	39Ar	mV	mV	mV	mV	mV	mV	mV	mV	mV	mV	40Ar								(Ma)	(Ma)
300	0.00323	91.2568	0.379	2.9707	0.0398	0.2183	0.0124	0.0017	0.0261	0.279	0.0172	90.28	5.59	1.05262	0.02144	0.00956	0.00092	2.98332	1.71828	17.66	10.12
500	0.01481	74.3567	0.293	10.6558	0.0439	0.5117	0.0121	0.0029	0.0376	0.191	0.0117	75.93	4.67	0.49842	0.00679	0.00719	0.00025	1.67305	0.32533	9.92	1.92
650	0.03049	123.551	0.4274	14.4201	0.0811	0.9392	0.0176	0.001	0.0249	0.1798	0.0158	43.09	3.79	0.12133	0.00324	0.011	0.00027	4.85951	0.32564	28.68	1.91
800	0.06699	228.995	1.2615	33.5685	0.2032	2.4056	0.02	0.0021	0.0418	0.1172	0.0147	15.11	1.9	0.11619	0.00239	0.01272	0.00016	5.76595	0.13906	33.98	0.81
950	0.11757	299.366	1.0218	46.5284	0.2037	3.452	0.0206	0.0011	0.0167	0.0412	0.0131	4.05	1.3	0.04387	0.00069	0.01335	0.00012	6.14501	0.09035	36.19	0.53
1100	0.17284	325.62	1.0959	50.8267	0.1832	3.8898	0.0251	0.0012	0.0224	0.0132	0.0105	1.18	0.96	0.04259	0.00082	0.01387	0.00012	6.30197	0.06872	37.1	0.4
1300	0.23788	382.317	1.2675	59.8286	0.2788	4.6375	0.0309	0.0013	0.0201	0.026	0.0171	1.99	1.33	0.04037	0.00064	0.01407	0.00013	6.23382	0.09199	36.7	0.54
1500	0.29882	358.431	1.1795	56.0435	0.1886	4.3023	0.0293	0.0014	0.0336	0.0014	0.0182	0.08	1.51	0.04441	0.00111	0.01393	0.00012	6.3606	0.10069	37.44	0.59
1800	0.36904	414.094	1.3464	64.585	0.2538	5.0382	0.0324	0.0024	0.0354	-0.0049	0.0166	-0.4	1.19	0.06803	0.00104	0.01419	0.00012	6.40769	0.08275	37.72	0.48
2200	0.45836	526.792	1.811	82.1557	0.3556	6.3229	0.0297	0.0055	0.053	0.0154	0.0157	0.78	0.88	0.12308	0.0013	0.01396	0.0001	6.33277	0.06648	37.28	0.39
3000	0.5841	736.202	2.5569	115.662	0.5203	8.9049	0.0752	0.0156	0.0852	0.0042	0.0191	-0.01	0.77	0.24687	0.00175	0.01398	0.00015	6.33635	0.0607	37.3	0.35
5000	0.9262	1963.38	12.1652	314.683	1.302	24.6748	0.1159	0.056	0.2657	0.0163	0.0164	0.01	0.25	0.3267	0.00206	0.01428	0.0001	6.20972	0.04897	36.56	0.29
9000	1	425.732	1.3302	67.8854	0.2314	5.397	0.0475	0.015	0.066	0.0013	0.0173	-0.2	1.2	0.40448	0.00225	0.01451	0.00016	6.2553	0.08059	36.83	0.47
Integrated		5950.09	12.9861	919.814	1.5653	70.6943	0.1648	0.1071	0.3051	0.8811	0.0571	4.25	0.28	0.21365	0.00071	0.01391	5e-05	6.16615	0.02543	36.31	0.18
48NEN BI#L1
Weighted average of J from standards = 3.560e-03 ± 8.734e-06 (1-sigma error)
Days since irradiation = 150
Laser Power	Cumulative	40Ar	±	39Ar	±	38Ar	±	37Ar	±	36Ar	±	% Atm.	±	Ca/K	±	Cl/K	±	40Ar*/39ArK	±	Age	±
(mW)	39Ar	mV	mV	mV	mV	mV	mV	mV	mV	mV	mV	40Ar								(Ma)	(Ma)
400	0.01125	150.3	0.3132	4.6628	0.0434	0.8538	0.0209	0.0001	0.1922	0.4909	0.0187	96.59	3.68	0.0317	0.07562	0.03213	0.00101	1.09793	1.18495	7.03	7.57
600	0.02623	77.6885	0.166	6.2144	0.0449	0.8694	0.0157	0.0001	0.174	0.1582	0.0113	60.31	4.31	0.03279	0.05139	0.02619	0.00057	4.95063	0.5394	31.48	3.4
800	0.0635	111.703	1.0853	15.4514	0.1462	1.9715	0.0467	0.0001	0.2236	0.074	0.0168	19.65	4.47	0.01052	0.02655	0.02441	0.00068	5.78495	0.33383	36.73	2.1
1000	0.12869	178.645	1.6432	27.0316	0.2831	3.386	0.0262	0.0003	0.1864	0.0708	0.0108	11.74	1.8	0.02198	0.01265	0.02401	0.00034	5.80665	0.14634	36.87	0.92
1250	0.1928	168.132	1.501	26.5827	0.3054	3.3438	0.0491	0	0.223	0.0379	0.0115	6.69	2.03	-0.00053	0.0154	0.02417	0.00049	5.87375	0.15546	37.29	0.98
1500	0.24304	134.294	1.4349	20.8314	0.2356	2.6548	0.0343	0.0002	0.2881	0.0359	0.012	7.92	2.65	0.01804	0.02538	0.0245	0.00046	5.90864	0.1955	37.51	1.23
1750	0.29482	140.139	1.3581	21.4693	0.2362	2.7524	0.033	0.0003	0.2362	0.0399	0.0111	8.44	2.35	0.02917	0.02019	0.02466	0.00044	5.94949	0.17769	37.77	1.12
2000	0.36462	181.697	1.5121	28.9423	0.2657	3.6713	0.0373	0.0002	0.2205	0.039	0.0096	6.36	1.57	0.01064	0.01398	0.02439	0.00036	5.85086	0.12343	37.15	0.78
2500	0.48613	310.521	1.867	50.3822	0.3474	6.2353	0.0408	0	0.252	0.0497	0.0168	4.76	1.61	-0.00016	0.00918	0.02376	0.00025	5.84192	0.11289	37.09	0.71
3000	0.67266	466.47	1.7666	77.3391	0.3282	9.5125	0.0466	0.0014	0.2756	0.0186	0.0115	1.16	0.73	0.03424	0.00654	0.02363	0.00017	5.93236	0.05548	37.66	0.35
3500	0.83757	411.18	1.5586	68.3815	0.3443	8.4667	0.0634	0.0024	0.2342	0.0339	0.0097	2.4	0.7	0.0647	0.00629	0.02379	0.00023	5.83997	0.05622	37.08	0.35
4500	0.92692	222.548	2.032	37.0482	0.3586	4.4316	0.0485	0.0014	0.2574	0.0296	0.0118	3.89	1.57	0.0672	0.01277	0.0229	0.00037	5.74475	0.12229	36.48	0.77
6000	0.97067	109.72	1.2292	18.1422	0.2322	2.1688	0.0316	0.0013	0.2606	0.0123	0.0134	3.25	3.64	0.12808	0.02641	0.02289	0.00049	5.82298	0.24123	36.97	1.52
8000	1	73.8937	1.0064	12.1601	0.1947	1.47	0.0311	0.0009	0.21	0.0224	0.0135	8.9	5.45	0.13722	0.03176	0.02312	0.00067	5.50926	0.35088	35	2.21
Integrated		2736.93	5.3043	414.639	0.9736	51.7878	0.1476	0.0087	0.8727	1.113	0.0488	12.04	0.53	0.03847	0.00386	0.02393	0.0001	5.77966	0.03947	36.7	0.26
03NEN BI#L1
Weighted average of J from standards = 3.301e-03 ± 8.614e-06 (1-sigma error)
Days since irradiation = 32
Laser Power	Cumulative	40Ar	±	39Ar	±	38Ar	±	37Ar	±	36Ar	±	% Atm.	±	Ca/K	±	Cl/K	±	40Ar*/39ArK	±	Age	±
(mW)	39Ar	mV	mV	mV	mV	mV	mV	mV	mV	mV	mV	40Ar								(Ma)	(Ma)
300	0.01061	119.864	0.3782	5.0933	0.0531	0.4154	0.0133	0.0012	0.0431	0.3608	0.013	88.98	3.23	0.44019	0.01621	0.01216	0.00058	2.59102	0.75996	15.35	4.48
500	0.03451	108.686	0.3892	11.477	0.0578	0.9582	0.0139	0.0003	0.027	0.1324	0.0142	36.09	3.87	0.0542	0.00432	0.01489	0.00027	6.03363	0.36836	35.54	2.15
650	0.09378	192.675	0.6229	28.4626	0.1507	2.4554	0.0295	0.0003	0.0313	0.0153	0.0147	2.35	2.27	0.01848	0.00202	0.0159	0.00024	6.58163	0.15844	38.73	0.92
800	0.1824	277.942	0.8795	42.5532	0.1566	3.6559	0.0305	0.0003	0.0366	0.0367	0.0143	3.91	1.53	0.01418	0.00158	0.01582	0.00016	6.24781	0.104	36.79	0.61
950	0.26514	259.808	0.8108	39.7286	0.1561	3.465	0.0293	0.0004	0.0282	0.0099	0.0117	1.12	1.33	0.01713	0.00131	0.01611	0.00017	6.43728	0.09267	37.89	0.54
1100	0.3313	210.86	0.6754	31.7675	0.1153	2.7538	0.0228	0.0005	0.0296	0.0097	0.0179	1.34	2.51	0.02679	0.00171	0.016	0.00017	6.51913	0.16911	38.37	0.98
1300	0.40042	223.296	0.5983	33.1898	0.198	2.9042	0.0271	0.0009	0.0335	0.0205	0.0138	2.69	1.83	0.04735	0.00187	0.01616	0.0002	6.51798	0.1298	38.36	0.76
1500	0.476	237.634	0.692	36.2967	0.1368	3.1337	0.0276	0.0011	0.0241	0.0392	0.011	4.86	1.38	0.05548	0.00124	0.0159	0.00017	6.20083	0.09477	36.51	0.55
1800	0.59137	354.125	1.0561	55.3989	0.2672	4.7605	0.0263	0.002	0.0302	0.0336	0.015	2.76	1.26	0.0678	0.00105	0.01583	0.00013	6.18683	0.08778	36.43	0.51
2200	0.73005	416.769	1.5377	66.5915	0.2914	5.7542	0.0271	0.0039	0.0464	0.0098	0.0087	0.62	0.62	0.10726	0.00136	0.01595	0.00012	6.19051	0.05256	36.45	0.31
3000	0.91428	553.117	1.8172	88.4707	0.3621	7.8282	0.0641	0.013	0.1019	0.0199	0.0146	0.87	0.78	0.26988	0.00238	0.01638	0.00017	6.1687	0.05865	36.32	0.34
5000	0.97755	192.035	0.4102	30.3839	0.0945	2.5561	0.0238	0.005	0.0529	0.0089	0.0094	1.16	1.46	0.30389	0.00333	0.01547	0.00017	6.21814	0.09458	36.61	0.55
9000	1	68.2161	0.2671	10.7821	0.0559	0.8884	0.0175	0.0015	0.0186	-0.0026	0.0132	-1.32	5.76	0.25249	0.00343	0.01512	0.00036	6.38084	0.36541	37.56	2.13
Integrated		3215.03	3.2293	480.196	0.6696	41.529	0.107	0.0304	0.1577	0.694	0.0483	6.33	0.45	0.11629	0.00062	0.01591	5e-05	6.244	0.03173	36.76	0.21
30NEN BI#L1
Weighted average of J from standards = 3.497e-03 ± 6.374e-06 (1-sigma error)
Days since irradiation = 36
Laser Power	Cumulative	40Ar	±	39Ar	±	38Ar	±	37Ar	±	36Ar	±	% Atm.	±	Ca/K	±	Cl/K	±	40Ar*/39ArK	±	Age	±
(mW)	39Ar	mV	mV	mV	mV	mV	mV	mV	mV	mV	mV	40Ar								(Ma)	(Ma)
400	0.0057	395.384	1.0181	10.281	0.067	1.0536	0.0177	0.0014	0.0441	1.2384	0.0205	92.6	1.55	0.24669	0.00803	0.0146	0.00039	2.84394	0.59801	17.83	3.73
600	0.01547	358.017	0.8236	17.616	0.0691	1.5385	0.0174	0.0019	0.044	1.1112	0.0231	91.81	1.92	0.19321	0.00465	0.01367	0.00022	1.66249	0.39103	10.45	2.45
800	0.02907	417.626	1.3565	24.5082	0.0796	2.1019	0.024	0.0017	0.0426	1.1396	0.02	80.74	1.44	0.12379	0.00321	0.01399	0.00021	3.27644	0.24711	20.53	1.54
1000	0.04881	435.638	1.2917	35.5885	0.1626	2.7559	0.0229	0.0014	0.0395	0.9231	0.0206	62.74	1.41	0.07316	0.00206	0.01305	0.00015	4.54984	0.17593	28.45	1.09
1250	0.07579	476.071	1.1726	48.6303	0.163	3.7761	0.046	0.0011	0.0347	0.748	0.0144	46.55	0.91	0.04239	0.00132	0.01351	0.00021	5.2164	0.0926	32.58	0.57
1500	0.10401	456.134	1.2359	50.8791	0.1306	4.0072	0.0311	0.0008	0.0382	0.6252	0.0176	40.62	1.15	0.03033	0.00138	0.01387	0.00014	5.30566	0.10609	33.13	0.66
1750	0.13607	487.75	1.4457	57.7781	0.2096	4.5672	0.0329	0.0009	0.0326	0.5437	0.019	33.04	1.16	0.0287	0.00104	0.01404	0.00013	5.63255	0.10226	35.15	0.63
2000	0.17521	563.684	1.5323	70.5649	0.2164	5.5256	0.044	0.0013	0.0413	0.6102	0.021	32.09	1.11	0.03251	0.00108	0.01391	0.00014	5.4045	0.09225	33.74	0.57
2500	0.24506	983.15	2.5203	125.921	0.4089	9.8016	0.0778	0.0025	0.0552	0.9901	0.0209	29.85	0.64	0.03618	0.00081	0.01385	0.00014	5.45609	0.05592	34.06	0.35
3000	0.3204	927.176	2.7094	135.8	0.3962	10.4221	0.0416	0.0028	0.0521	0.6098	0.0178	19.5	0.57	0.03804	0.00071	0.01375	8e-05	5.47262	0.04637	34.16	0.29
3750	0.41152	1099.82	2.5166	164.263	0.3878	12.4739	0.0574	0.0044	0.0586	0.6545	0.0146	17.63	0.4	0.04904	0.00066	0.0136	8e-05	5.49072	0.03308	34.28	0.2
4500	0.50727	1096.62	2.7105	172.6	0.4508	13.1569	0.06	0.0061	0.057	0.4295	0.0117	11.58	0.32	0.06449	0.00063	0.01372	8e-05	5.59157	0.02935	34.9	0.18
5500	0.83841	3619.46	3.8597	596.937	1.5372	46.101	0.131	0.0125	0.1328	0.8537	0.0227	6.98	0.19	0.03839	0.00042	0.01397	6e-05	5.61288	0.01948	35.03	0.12
6500	0.91243	796.65	2.2888	133.416	0.3619	10.3395	0.0334	0.0022	0.0411	0.1462	0.0121	5.43	0.45	0.02977	0.00057	0.01404	7e-05	5.61908	0.03539	35.07	0.22
8000	1	939.028	2.1009	157.864	0.4346	12.163	0.0497	0.0014	0.0427	0.1428	0.0096	4.5	0.3	0.01671	0.0005	0.01395	8e-05	5.65217	0.02727	35.27	0.17
Integrated		13052.2	8.0304	1802.65	1.8807	139.784	0.2079	0.0423	0.2151	10.7661	0.0704	24.45	0.16	0.04303	0.00022	0.01386	3e-05	5.44805	0.01363	34.01	0.1
10CH05B BI#L1
Weighted average of J from standards = 2.673e-03 ± 1.283e-05 (1-sigma error)
Days since irradiation = 32
Laser Power	Cumulative	40Ar	±	39Ar	±	38Ar	±	37Ar	±	36Ar	±	% Atm.	±	Ca/K	±	Cl/K	±	40Ar*/39ArK	±	Age	±
(mW)	39Ar	mV	mV	mV	mV	mV	mV	mV	mV	mV	mV	40Ar								(Ma)	(Ma)
500	0.01274	121.034	0.2162	13.0819	0.0946	0.9458	0.0113	0.0007	0.041	0.2081	0.0211	50.92	5.18	0.09461	0.0058	0.01237	0.00022	4.52681	0.47879	21.67	2.28
1000	0.0529	205.631	0.5683	41.2244	0.1366	2.4068	0.0214	0.0019	0.0611	0.1358	0.0168	19.56	2.43	0.08546	0.00273	0.00994	0.00012	3.98886	0.12185	19.11	0.58
1500	0.15314	525.001	1.0552	102.894	0.2826	6.5393	0.0612	0.0036	0.0601	0.1014	0.0209	5.68	1.18	0.06396	0.00109	0.01112	0.00013	4.78458	0.06233	22.9	0.3
2000	0.26619	620.227	1.7814	116.041	0.3018	7.5655	0.0499	0.0042	0.0778	0.0915	0.0256	4.33	1.23	0.0658	0.00124	0.01147	0.0001	5.08538	0.06827	24.33	0.32
2500	0.35376	485.879	1.2453	89.8926	0.3698	5.7675	0.0146	0.0043	0.0614	0.0578	0.0147	3.46	0.9	0.08857	0.00131	0.01126	7e-05	5.18941	0.05467	24.83	0.26
3000	0.41869	342.876	0.9178	66.6412	0.1482	4.0285	0.0265	0.0038	0.0738	0.0373	0.0196	3.14	1.7	0.10454	0.00204	0.01048	9e-05	4.95474	0.08871	23.71	0.42
5000	0.66252	1360.28	3.1516	250.296	0.663	17.0779	0.1165	0.0086	0.099	0.1803	0.0176	3.89	0.38	0.06324	0.00074	0.01211	0.0001	5.19511	0.02794	24.85	0.13
9000	1	2180.09	5.5728	346.41	0.7394	24.9067	0.0652	0.0097	0.0851	0.1534	0.0215	2.05	0.29	0.05116	0.00046	0.01289	5e-05	6.13526	0.02772	29.31	0.13
Integrated		5841.02	6.931	1026.48	1.1591	69.238	0.1599	0.0368	0.2033	0.9656	0.0565	4.86	0.29	0.06572	0.00037	0.01194	4e-05	5.38576	0.01864	25.76	0.15
10CH13 BI#L1
Weighted average of J from standards = 3.238e-03 ± 1.595e-05 (1-sigma error)
Days since irradiation = 242
Laser Power	Cumulative	40Ar	±	39Ar	±	38Ar	±	37Ar	±	36Ar	±	% Atm.	±	Ca/K	±	Cl/K	±	40Ar*/39ArK	±	Age	±
(mW)	39Ar	mV	mV	mV	mV	mV	mV	mV	mV	mV	mV	40Ar								(Ma)	(Ma)
500	0.00641	229.345	0.3916	16.8544	0.1017	1.1899	0.0202	-0.0006	2.4741	0.5664	0.0334	73.16	4.31	-0.06229	0.26933	0.01131	0.00028	3.64397	0.58574	21.14	3.38
1000	0.02784	472.547	1.1802	56.3249	0.1363	3.6597	0.0281	-0.0011	2.9297	0.8578	0.0264	53.85	1.66	-0.03423	0.09544	0.01085	0.00011	3.85806	0.14046	22.38	0.81
1500	0.07512	794.636	1.5316	124.295	0.4103	8.615	0.0693	0.0072	2.8204	0.8905	0.0263	33.19	0.98	0.10588	0.04164	0.01208	0.00013	4.25134	0.06529	24.64	0.38
2000	0.13604	949.609	2.2716	160.139	0.2747	11.107	0.0378	0.0048	2.764	0.7575	0.0223	23.65	0.7	0.05543	0.03167	0.01219	6e-05	4.50503	0.04424	26.1	0.25
3000	0.25599	1850.24	3.7163	315.31	0.5307	22.1486	0.0688	0.0163	3.2424	1.3931	0.0325	22.29	0.52	0.09459	0.01887	0.01239	5e-05	4.53718	0.03354	26.29	0.19
5000	0.53137	4052.06	6.3705	723.879	1.4091	51.9971	0.1356	0.0467	3.0465	2.4211	0.0396	17.65	0.29	0.11831	0.00773	0.01276	5e-05	4.58519	0.0205	26.56	0.12
9000	1	7011.43	10.9938	1231.92	2.667	91.5045	0.3698	0.1046	3.959	3.5536	0.0286	14.93	0.12	0.15578	0.00591	0.01329	7e-05	4.81667	0.01539	27.89	0.09
Integrated		15359.9	13.5761	2628.72	3.1069	190.222	0.409	0.1779	8.1097	10.44	0.0803	20.09	0.16	0.12418	0.00566	0.01285	4e-05	4.64562	0.01178	26.91	0.15
10CH09 BI#L1
Weighted average of J from standards = 3.238e-03 ± 1.595e-05 (1-sigma error)
Days since irradiation = 242
Laser Power	Cumulative	40Ar	±	39Ar	±	38Ar	±	37Ar	±	36Ar	±	% Atm.	±	Ca/K	±	Cl/K	±	40Ar*/39ArK	±	Age	±
(mW)	39Ar	mV	mV	mV	mV	mV	mV	mV	mV	mV	mV	40Ar								(Ma)	(Ma)
500	0.00945	143.802	0.3397	17.0578	0.0821	0.9478	0.022	-0.0029	2.0717	0.3113	0.0161	64.37	3.33	-0.30979	0.2228	0.00876	0.00028	2.993	0.28064	17.38	1.62
1000	0.04661	370.342	0.9391	67.0672	0.1233	4.0239	0.0403	-0.003	3.1713	0.3098	0.0176	24.92	1.41	-0.08127	0.08676	0.01023	0.00013	4.12327	0.07924	23.9	0.46
1500	0.11313	632.024	1.2966	120.078	0.2911	7.185	0.077	-0.0026	2.5477	0.3723	0.0195	17.54	0.92	-0.03927	0.03893	0.01025	0.00014	4.31578	0.05044	25.01	0.29
2000	0.19749	779.13	1.6135	152.265	0.3866	8.9157	0.0389	-0.0037	2.0048	0.297	0.0216	11.37	0.83	-0.04405	0.02416	0.01003	6e-05	4.50872	0.04485	26.12	0.26
3000	0.36659	1529.41	3.1225	305.24	0.6989	18.0742	0.0598	-0.0044	2.0803	0.4913	0.0332	9.57	0.65	-0.02661	0.01251	0.01018	5e-05	4.50396	0.03529	26.09	0.2
5000	0.65012	2530.47	5.9603	511.78	1.4619	29.7319	0.0639	-0.0024	2.3459	0.4093	0.0173	4.82	0.2	-0.00878	0.00841	0.00998	4e-05	4.67801	0.02042	27.1	0.12
9000	1	3123.2	4.9569	631.56	1.0756	36.5299	0.1384	0.0008	2.0106	0.5386	0.0145	5.12	0.14	0.00244	0.00584	0.00992	5e-05	4.6636	0.01309	27.01	0.08
Integrated		9108.38	8.6676	1805.05	2.0097	105.409	0.1907	-0.0181	6.2235	2.7297	0.0551	8.92	0.18	-0.01841	0.00633	0.01001	3e-05	4.56862	0.01143	26.47	0.15
15CSR06 BI#L1
Weighted average of J from standards = 4.969e-03 ± 1.797e-05 (1-sigma error)
Days since irradiation = 55
Laser Power	Cumulative	40Ar	±	39Ar	±	38Ar	±	37Ar	±	36Ar	±	% Atm.	±	Ca/K	±	Cl/K	±	40Ar*/39ArK	±	Age	±
(mW)	39Ar	mV	mV	mV	mV	mV	mV	mV	mV	mV	mV	40Ar								(Ma)	(Ma)
500	0.06129	433.9	0.7961	92.0248	0.2441	5.2019	0.0384	0.0029	0.0831	0.993	0.0304	68	2.09	0.05805	0.00166	0.00926	9e-05	1.49942	0.09824	13.38	0.87
1000	0.31706	948.126	0.7557	384.036	1.1208	24.4207	0.121	0.0081	0.1113	0.3539	0.0288	11.09	0.91	0.03885	0.00054	0.01113	8e-05	2.16857	0.02318	19.31	0.21
1500	0.56334	823.575	0.6059	369.799	0.8909	19.6616	0.0885	0.0104	0.1225	0.1875	0.023	6.71	0.84	0.05157	0.00062	0.00895	6e-05	2.04991	0.01915	18.26	0.17
2000	0.76489	686.914	0.5976	302.635	0.4112	17.7602	0.1081	0.0114	0.1225	0.1555	0.0199	6.64	0.87	0.06892	0.00075	0.01011	8e-05	2.09135	0.01975	18.63	0.18
2500	0.86754	364.859	0.3688	154.126	0.2685	9.5058	0.0685	0.0135	0.1443	0.0781	0.0192	6.1	1.57	0.16099	0.00174	0.01074	0.0001	2.19518	0.03706	19.55	0.33
3000	0.91721	179.376	0.3083	74.5918	0.2126	4.7254	0.0436	0.0161	0.2314	0.0344	0.0238	4.98	3.96	0.39714	0.0058	0.0111	0.00013	2.25709	0.09448	20.1	0.84
5000	0.9743	213.019	0.2558	85.7418	0.2229	5.6102	0.0343	0.0346	0.3102	0.0282	0.0231	2.6	3.24	0.741	0.00692	0.01154	9e-05	2.39154	0.0798	21.29	0.71
9000	1	94.9808	0.2637	38.6061	0.0984	2.4716	0.0426	0.0173	0.1416	0.0027	0.0191	-0.68	6	0.82317	0.00705	0.01126	0.00023	2.44782	0.14619	21.79	1.29
Integrated		3744.75	1.515	1501.56	1.5669	89.3575	0.2127	0.1144	0.4898	1.8333	0.0672	14.39	0.54	0.1398	0.00062	0.01026	3e-05	2.10981	0.01345	18.79	0.14
15CSR05 BI#L1
Weighted average of J from standards = 4.969e-03 ± 1.797e-05 (1-sigma error)
Days since irradiation = 55
Laser Power	Cumulative	40Ar	±	39Ar	±	38Ar	±	37Ar	±	36Ar	±	% Atm.	±	Ca/K	±	Cl/K	±	40Ar*/39ArK	±	Age	±
(mW)	39Ar	mV	mV	mV	mV	mV	mV	mV	mV	mV	mV	40Ar								(Ma)	(Ma)
500	0.05291	794.098	0.7639	70.6117	0.178	4.1549	0.0371	0.0027	0.0768	2.125	0.0423	79.26	1.58	0.07007	0.002	0.00898	0.00012	2.32674	0.17728	20.71	1.57
1000	0.27995	1192.48	1.0415	302.981	0.8729	15.7768	0.087	0.0057	0.0638	1.0045	0.0197	25.04	0.49	0.03481	0.0004	0.00861	7e-05	2.928	0.02129	26.03	0.19
1500	0.48223	978.179	0.8139	269.937	0.5778	13.5118	0.0643	0.0061	0.1198	0.5942	0.0313	18.05	0.95	0.04151	0.00082	0.00823	5e-05	2.94546	0.03501	26.18	0.31
2000	0.70239	1018.93	0.6693	293.794	0.7791	14.4602	0.0532	0.0063	0.1178	0.4973	0.0163	14.49	0.48	0.0395	0.00074	0.00808	5e-05	2.94016	0.01832	26.14	0.16
2500	0.83034	570.316	0.5483	170.743	0.4488	8.379	0.049	0.006	0.1142	0.2477	0.0205	12.86	1.07	0.06492	0.00124	0.00806	7e-05	2.88485	0.03641	25.65	0.32
3000	0.8942	275.543	0.3794	85.2235	0.2665	4.0958	0.0602	0.0078	0.1246	0.0894	0.0213	9.45	2.31	0.16718	0.00273	0.00786	0.00015	2.90108	0.07468	25.79	0.66
5000	0.95626	267.752	0.4133	82.8377	0.1737	4.0302	0.0347	0.0217	0.2646	0.0503	0.0216	4.93	2.41	0.48032	0.00595	0.00801	9e-05	3.04519	0.07762	27.06	0.68
9000	1	189.795	0.2916	58.3749	0.1593	2.8913	0.0435	0.0131	0.1411	0.0133	0.0197	1.51	3.09	0.41309	0.00458	0.0082	0.00016	3.17341	0.10003	28.19	0.88
Integrated		5287.1	1.8652	1334.5	1.4361	67.2999	0.1582	0.0695	0.3958	4.6217	0.0718	25.92	0.4	0.09557	0.00055	0.00826	3e-05	2.91316	0.01626	25.9	0.17
43DEB BI#L1
Weighted average of J from standards = 3.238e-03 ± 1.595e-05 (1-sigma error)
Days since irradiation = 242
Laser Power	Cumulative	40Ar	±	39Ar	±	38Ar	±	37Ar	±	36Ar	±	% Atm.	±	Ca/K	±	Cl/K	±	40Ar*/39ArK	±	Age	±
(mW)	39Ar	mV	mV	mV	mV	mV	mV	mV	mV	mV	mV	40Ar								(Ma)	(Ma)
500	0.0032	135.426	0.2868	6.7621	0.0512	2.1209	0.024	0.0018	2.1003	0.4496	0.0192	98.13	4.21	0.48277	0.57013	0.06108	0.00089	0.37317	0.84164	2.18	4.91
1000	0.02269	272.223	0.737	41.2576	0.1199	18.0854	0.0996	0.0026	2.5213	0.6287	0.0196	68.48	2.15	0.11346	0.11214	0.08927	0.00057	2.07055	0.14179	12.04	0.82
1500	0.07377	598.713	1.8055	108.075	0.3458	37.08	0.1363	-0.0011	2.2904	1.0428	0.0265	51.76	1.33	-0.01798	0.03889	0.06948	0.00035	2.6579	0.07498	15.44	0.43
2000	0.14004	549.904	1.2184	140.244	0.2981	51.4955	0.2142	-0.0003	2.5313	0.4974	0.0218	26.94	1.18	-0.00329	0.03312	0.07478	0.00036	2.84318	0.04715	16.52	0.27
3000	0.27506	943.168	2.3979	285.704	0.5794	102.934	0.1541	-0.0027	1.7745	0.4693	0.0252	14.86	0.8	-0.01717	0.0114	0.0734	0.00019	2.78537	0.02793	16.18	0.16
5000	0.55659	2019.15	4.056	595.732	1.368	214.112	0.4209	-0.0037	2.0492	1.0127	0.0239	14.97	0.35	-0.01133	0.00631	0.07322	0.00023	2.85682	0.01519	16.6	0.09
9000	1	2850.69	5.8075	938.272	2.0838	210.796	0.4029	0.0011	1.8629	0.6307	0.0237	6.6	0.25	0.00223	0.00364	0.04496	0.00014	2.81002	0.01157	16.32	0.07
Integrated		7369.28	7.8293	2116.05	2.6028	636.624	0.662	-0.0022	5.7654	4.7312	0.0608	19.14	0.25	-0.0019	0.005	0.0609	0.0001	2.79209	0.00989	16.22	0.1
25DEB BI#L1
Weighted average of J from standards = 3.497e-03 ± 6.374e-06 (1-sigma error)
Days since irradiation = 29
Laser Power	Cumulative	40Ar	±	39Ar	±	38Ar	±	37Ar	±	36Ar	±	% Atm.	±	Ca/K	±	Cl/K	±	40Ar*/39ArK	±	Age	±
(mW)	39Ar	mV	mV	mV	mV	mV	mV	mV	mV	mV	mV	40Ar								(Ma)	(Ma)
400	0.01044	36.9146	0.2424	1.7505	0.0337	0.0988	0.0133	0.0001	0.0265	0.1274	0.0125	102.14	10.03	0.0997	0.02787	0.00681	0.00163	-0.45046	2.11304	-2.84	13.34
600	0.06766	114.808	0.4851	9.5996	0.0774	0.5308	0.016	0.0003	0.0267	0.2662	0.0159	68.66	4.11	0.05649	0.00512	0.00833	0.00037	3.73878	0.49321	23.41	3.07
800	0.1745	128.5	0.4208	17.9201	0.0971	0.9755	0.0173	0.0003	0.0253	0.185	0.012	42.71	2.78	0.03282	0.0026	0.00883	0.00021	4.09139	0.20113	25.6	1.25
1000	0.28265	108.257	0.403	18.1415	0.0921	1.0066	0.0216	0.0002	0.0281	0.0898	0.0163	24.61	4.49	0.02248	0.00285	0.00927	0.00026	4.47628	0.26816	27.99	1.66
1250	0.36154	77.5001	0.327	13.2337	0.094	0.7799	0.0206	0.0002	0.0295	0.0577	0.0139	22.11	5.31	0.02474	0.0041	0.01001	0.00034	4.53839	0.31224	28.38	1.94
1500	0.4319	69.8496	0.3856	11.802	0.074	0.699	0.0189	0.0002	0.0276	0.0594	0.0126	25.22	5.36	0.02926	0.0043	0.01005	0.00035	4.40364	0.31823	27.54	1.98
1750	0.50201	69.3047	0.3658	11.7592	0.0801	0.6555	0.0269	0.0002	0.0339	0.0541	0.016	23.18	6.86	0.02972	0.00529	0.00933	0.00049	4.50484	0.40436	28.17	2.51
2000	0.58575	83.1024	0.3874	14.047	0.0949	0.7466	0.0242	0.0002	0.0424	0.059	0.0149	21.06	5.34	0.02682	0.00554	0.0088	0.00037	4.64652	0.31702	29.05	1.97
2500	0.71926	133.713	0.5783	22.3946	0.1071	1.2307	0.0204	0.0005	0.0325	0.1132	0.0101	25.11	2.24	0.04449	0.00267	0.00915	0.0002	4.44957	0.1372	27.83	0.85
3000	0.82862	110.006	0.6044	18.3444	0.0825	1.0377	0.0256	0.0016	0.0312	0.0969	0.0108	26.04	2.92	0.1646	0.00321	0.00948	0.0003	4.41361	0.1782	27.6	1.11
4000	0.96096	134.442	0.5376	22.2054	0.0998	1.3558	0.0259	0.0078	0.0628	0.0917	0.0132	19.78	2.92	0.64302	0.00594	0.01047	0.00025	4.83446	0.1792	30.21	1.11
6000	0.98547	26.413	0.1105	4.1117	0.0546	0.2888	0.0225	0.0012	0.0348	0.009	0.0167	9.72	18.76	0.53	0.01706	0.01248	0.00117	5.7737	1.20286	36.02	7.43
8000	1	15.763	0.0939	2.4375	0.0351	0.1412	0.0196	0.0008	0.0274	0.0002	0.0092	0.02	17.41	0.62891	0.02253	0.00998	0.0017	6.43759	1.1258	40.12	6.94
Integrated		1108.57	1.4774	167.747	0.2953	9.5469	0.0769	0.0137	0.124	1.2097	0.0491	32.29	1.31	0.14972	0.00138	0.00948	0.0001	4.45487	0.08727	27.86	0.54
22DEB SINGLE GRAIN FUSIONS BI#L1
Weighted average of J from standards = 4.006e-03 ± 1.480e-05 (1-sigma error)
Days since irradiation = 51
Laser Power	Cumulative	40Ar	±	39Ar	±	38Ar	±	37Ar	±	36Ar	±	% Atm.	±	Ca/K	±	Cl/K	±	40Ar*/39ArK	±	Age	±
(mW)	39Ar	mV	mV	mV	mV	mV	mV	mV	mV	mV	mV	40Ar								(Ma)	(Ma)
9000	0.0286	115.428	0.8203	34.5774	0.0504	0.6007	0.0183	0.0001	0.0393	0.159	0.0125	41.06	3.24	0.00554	0.00208	0.00128	0.00011	1.94993	0.10938	14.02	0.78
9000	0.17545	737.918	1.2831	177.589	0.5099	2.6797	0.0214	0.05	0.2343	1.121	0.0214	44.65	0.87	0.51701	0.00284	0.00073	3e-05	2.28397	0.03696	16.41	0.26
9000	0.2537	315.064	0.6129	94.6101	0.2513	1.4784	0.0208	0.0014	0.0409	0.364	0.0137	34.41	1.29	0.02794	0.0008	0.00094	5e-05	2.16468	0.04352	15.56	0.31
9000	0.37154	470.512	0.6702	142.478	0.194	2.3857	0.0298	0.0032	0.057	0.4664	0.0138	29.5	0.88	0.04079	0.00074	0.0012	4e-05	2.30729	0.02923	16.58	0.21
9000	0.47701	468.639	0.6882	127.516	0.2666	2.2422	0.027	0.0042	0.065	0.6456	0.0239	40.96	1.52	0.06097	0.00094	0.0013	5e-05	2.15225	0.05591	15.47	0.4
9000	0.62767	500.065	0.7659	182.162	0.4406	2.7537	0.0299	0.0034	0.0536	0.329	0.0233	19.6	1.39	0.03428	0.00055	0.00091	4e-05	2.18334	0.03833	15.69	0.27
9000	0.71513	441.3	0.7202	105.748	0.2701	1.7692	0.0248	0.0027	0.0601	0.7568	0.0205	50.99	1.39	0.04703	0.00105	0.00104	5e-05	2.03067	0.05802	14.6	0.42
9000	1	1104.09	2.9428	344.432	1.1029	5.6668	0.0561	0.0095	0.0886	1.1191	0.016	30.16	0.44	0.05036	0.0005	0.00114	4e-05	2.21805	0.01771	15.94	0.13
Integrated		4153.01	3.6582	1209.11	1.3849	19.5763	0.0866	0.0745	0.2827	4.9608	0.0528	35.46	0.38	0.11313	0.00045	0.00105	2e-05	2.19784	0.01349	15.8	0.11
12DEB BI#L1
Weighted average of J from standards = 3.584e-03 ± 1.277e-05 (1-sigma error)
Days since irradiation = 58
Laser Power	Cumulative	40Ar	±	39Ar	±	38Ar	±	37Ar	±	36Ar	±	% Atm.	±	Ca/K	±	Cl/K	±	40Ar*/39ArK	±	Age	±
(mW)	39Ar	mV	mV	mV	mV	mV	mV	mV	mV	mV	mV	40Ar								(Ma)	(Ma)
400	0.00449	477.12	1.2214	8.4266	0.0436	1.3404	0.0266	0.0015	0.0886	1.5649	0.0323	96.95	2.02	0.31697	0.01936	0.02393	0.00069	1.72746	1.14246	11.12	7.33
600	0.01405	335.548	1.4801	17.9388	0.1003	2.7031	0.0338	0.0031	0.0561	1.0063	0.0156	88.69	1.43	0.31924	0.00601	0.02725	0.00043	2.11286	0.27044	13.59	1.73
800	0.03719	1109.79	6.9333	43.4219	0.3411	7.2508	0.0646	0.0019	0.0732	3.142	0.0406	83.74	1.2	0.08037	0.00316	0.03004	0.0004	4.14986	0.32107	26.6	2.04
1000	0.09386	1749.1	9.3993	106.306	0.6418	17.2348	0.0808	0.0023	0.0627	4.1566	0.0224	70.34	0.54	0.04016	0.00111	0.03032	0.00025	4.87157	0.11208	31.19	0.71
1250	0.18248	1259.82	8.1868	166.27	1.1722	26.0331	0.2128	0.0028	0.0575	1.4922	0.019	35.12	0.5	0.03081	0.00067	0.03034	0.00035	4.89669	0.06908	31.35	0.44
1500	0.29259	1264.15	8.9994	206.588	1.4984	32.2253	0.3232	0.0031	0.0813	0.787	0.0236	18.46	0.57	0.02777	0.00075	0.03042	0.0004	4.96513	0.06592	31.78	0.42
1750	0.3939	1118.83	4.6714	190.082	0.9451	29.7634	0.1728	0.0027	0.0616	0.5611	0.0192	14.87	0.51	0.02629	0.00061	0.03057	0.00025	4.98528	0.04601	31.91	0.29
2000	0.47587	893.677	1.8759	153.787	0.5423	23.9942	0.065	0.0025	0.061	0.4345	0.011	14.42	0.37	0.02949	0.00073	0.03046	0.00015	4.948	0.03007	31.68	0.19
2500	0.57968	1180.57	6.9023	194.759	1.2461	30.6113	0.1664	0.0045	0.0717	0.6469	0.0137	16.24	0.36	0.04239	0.00073	0.03068	0.00028	5.0524	0.05239	32.34	0.33
3000	0.69654	1322.03	7.2718	219.25	1.2818	34.6841	0.2305	0.007	0.1268	0.7107	0.0127	15.92	0.3	0.05826	0.00111	0.0309	0.00029	5.0449	0.04767	32.29	0.3
3500	0.81109	1256.01	7.166	214.92	1.269	33.6645	0.2602	0.0087	0.0715	0.5856	0.0127	13.79	0.31	0.07404	0.00075	0.0306	0.00032	5.01271	0.04798	32.09	0.3
4500	0.90726	1018.21	2.7113	180.445	0.6298	27.7403	0.1378	0.0208	0.1588	0.437	0.0125	12.58	0.37	0.21164	0.00178	0.03	0.0002	4.90728	0.03068	31.42	0.19
6000	0.96833	648.89	2.0233	114.591	0.4153	17.632	0.1004	0.0177	0.1788	0.3117	0.0144	14.04	0.66	0.28325	0.00304	0.03002	0.00022	4.84253	0.04479	31.01	0.28
8000	1	337.154	1.2651	59.4265	0.2495	9.1855	0.0414	0.0087	0.1087	0.1553	0.0113	13.47	1	0.26935	0.00354	0.03017	0.0002	4.88424	0.06368	31.27	0.4
Integrated		13970.9	21.8717	1876.21	3.2839	294.063	0.6129	0.0873	0.3648	15.9918	0.0765	33.91	0.17	0.08535	0.00039	0.03039	9e-05	4.90194	0.01885	31.38	0.16
10DEB BI#L1
Weighted average of J from standards = 3.584e-03 ± 1.277e-05 (1-sigma error)
Days since irradiation = 58
Laser Power	Cumulative	40Ar	±	39Ar	±	38Ar	±	37Ar	±	36Ar	±	% Atm.	±	Ca/K	±	Cl/K	±	40Ar*/39ArK	±	Age	±
(mW)	39Ar	mV	mV	mV	mV	mV	mV	mV	mV	mV	mV	40Ar								(Ma)	(Ma)
400	0.00248	276.79	1.0568	5.2634	0.0456	0.7217	0.017	0.0007	0.0383	0.9082	0.0211	97	2.28	0.25769	0.01352	0.01983	0.00072	1.57839	1.20123	10.17	7.71
600	0.01394	329.308	1.0995	24.3221	0.0965	3.0206	0.0383	0.0011	0.0524	0.8145	0.0196	73.22	1.78	0.08468	0.00397	0.02257	0.00035	3.6175	0.24313	23.21	1.55
800	0.04126	640.517	2.1858	57.9707	0.2569	7.279	0.036	0.001	0.0487	1.3511	0.0179	62.49	0.86	0.03056	0.00155	0.02326	0.00017	4.13345	0.10053	26.5	0.64
1000	0.08401	827.815	2.1756	90.7348	0.2836	11.141	0.0556	0.001	0.037	1.5141	0.0181	54.21	0.66	0.02092	0.00075	0.02294	0.00015	4.16384	0.06487	26.69	0.41
1250	0.14664	881.696	1.7132	132.901	0.2478	15.981	0.0458	0.0014	0.0484	1.0211	0.0159	34.36	0.54	0.01961	0.00067	0.02276	9e-05	4.33508	0.03842	27.78	0.24
1500	0.22046	821.068	1.94	156.654	0.3771	18.64	0.0618	0.0021	0.0381	0.4627	0.0168	16.73	0.61	0.02414	0.00045	0.02268	0.0001	4.33995	0.03557	27.81	0.23
1750	0.30352	853.266	2.2034	176.274	0.3572	21.0172	0.0754	0.0019	0.109	0.2548	0.0133	8.86	0.46	0.01967	0.00113	0.02279	0.0001	4.38466	0.02707	28.1	0.17
2000	0.38882	852.491	1.6368	181.01	0.23	21.5043	0.0832	0.0042	0.0802	0.156	0.0115	5.4	0.4	0.04304	0.00082	0.02272	0.0001	4.42729	0.02164	28.37	0.14
2500	0.50283	1121.99	5.4827	241.944	1.2391	28.8622	0.1586	0.0087	0.1509	0.1668	0.0101	4.36	0.27	0.06581	0.00119	0.02283	0.00019	4.40708	0.03438	28.24	0.22
3000	0.66931	1636.57	9.3709	353.308	1.9467	42.2967	0.2898	0.0233	0.1731	0.2269	0.0233	4.01	0.42	0.12106	0.00112	0.02292	0.00022	4.41828	0.04105	28.31	0.26
3500	0.80059	1288.02	8.4934	278.604	1.809	33.2314	0.3441	0.0158	0.1277	0.1787	0.0104	4.02	0.24	0.10423	0.00108	0.02283	0.00031	4.40879	0.04338	28.25	0.28
4500	0.91207	1094.27	5.026	236.596	1.0447	27.8203	0.1243	0.0214	0.2162	0.1577	0.0131	4.12	0.36	0.16599	0.00183	0.02248	0.00016	4.40615	0.03323	28.23	0.21
6000	0.97179	587.656	1.678	126.743	0.3542	14.7843	0.0644	0.0127	0.078	0.1262	0.0131	6.21	0.66	0.18415	0.00124	0.02227	0.00013	4.32125	0.03537	27.69	0.22
8000	1	278.968	1.1958	59.8619	0.3135	7.0247	0.0485	0.0061	0.0939	0.047	0.014	4.83	1.5	0.18564	0.00304	0.02242	0.00021	4.40705	0.07576	28.24	0.48
Integrated		11490.4	15.6712	2122.19	3.2333	253.324	0.5236	0.1015	0.4009	7.3858	0.0601	19.03	0.16	0.08773	0.00037	0.02274	6e-05	4.3604	0.01301	27.94	0.13
15DEB BI#L1
Weighted average of J from standards = 3.584e-03 ? 1.277e-05 (1-sigma error)
Days since irradiation = 59
Laser Power	Cumulative	40Ar	?	39Ar	?	38Ar	?	37Ar	?	36Ar	?	% Atm.	?	Ca/K	?	Cl/K	?	40Ar*/39ArK	?	Age	?
(mW)	39Ar	mV	mV	mV	mV	mV	mV	mV	mV	mV	mV	40Ar								(Ma)	(Ma)
400	0.00526	145.683	0.5936	8.8202	0.0551	0.698	0.0209	0.0056	0.0711	0.4742	0.0179	96.04	3.65	1.16929	0.01651	0.01233	0.00051	0.65237	0.60264	4.21	3.88
600	0.02058	142.643	0.5546	25.6812	0.1135	2.1762	0.0254	0.0107	0.0884	0.452	0.0159	93.53	3.34	0.76236	0.00716	0.01492	0.00022	0.35767	0.18449	2.31	1.19
800	0.04763	312.38	1.5948	45.3425	0.2982	4.0373	0.0399	0.0088	0.0918	0.7907	0.0152	74.89	1.5	0.35757	0.0044	0.01583	0.00022	1.72289	0.10595	11.09	0.68
1000	0.08662	489.219	1.9918	65.3576	0.358	6.1674	0.0615	0.0051	0.0804	0.8243	0.0201	49.9	1.24	0.14379	0.00239	0.01713	0.00022	3.73529	0.09808	23.96	0.63
1250	0.13178	518.83	1.3465	75.7043	0.2155	7.4395	0.0575	0.0037	0.0972	0.5941	0.0165	33.92	0.95	0.09051	0.00237	0.01814	0.00017	4.5091	0.06823	28.89	0.43
1500	0.1735	431.312	1.4814	69.9244	0.2538	6.8757	0.0374	0.0038	0.0606	0.3703	0.0177	25.42	1.22	0.09935	0.00163	0.01825	0.00013	4.57823	0.07965	29.33	0.51
1750	0.211	363.954	1.1112	62.8547	0.2016	6.2969	0.036	0.005	0.0744	0.2311	0.0168	18.75	1.37	0.1474	0.00222	0.0187	0.00014	4.68108	0.08234	29.98	0.52
2000	0.24992	368.048	1.188	65.2455	0.1447	6.5991	0.0512	0.0036	0.0581	0.1752	0.0139	14.06	1.12	0.10225	0.00165	0.01894	0.00017	4.82245	0.06637	30.88	0.42
2500	0.31986	656.534	1.3564	117.232	0.2683	11.9674	0.0437	0.0081	0.0781	0.2592	0.0219	11.63	0.99	0.12735	0.00126	0.01916	9e-05	4.92315	0.05746	31.52	0.36
3000	0.41313	843.891	2.3004	156.329	0.5764	15.9001	0.066	0.0117	0.103	0.2416	0.0293	8.39	1.03	0.13713	0.00131	0.01911	0.00012	4.91821	0.06021	31.49	0.38
3500	0.54014	1129.66	5.8617	212.895	1.1275	21.5699	0.1305	0.0234	0.1627	0.2713	0.0156	6.97	0.41	0.2013	0.00176	0.01904	0.00017	4.90932	0.04372	31.43	0.28
4500	0.83116	2541.44	7.1037	487.871	1.111	49.5452	0.1665	0.1243	0.3141	0.5637	0.0235	6.19	0.27	0.4674	0.00159	0.0191	9e-05	4.86001	0.0232	31.12	0.15
6000	0.97038	1108.09	4.5164	233.404	0.9209	22.1573	0.1207	0.079	0.3714	0.2233	0.0188	5.4	0.5	0.62134	0.00381	0.01771	0.00013	4.46404	0.03544	28.6	0.23
8000	1	201.428	0.4991	49.6503	0.1763	3.8865	0.0222	0.0128	0.0858	0.0625	0.0149	8.71	2.2	0.47317	0.00359	0.0142	0.00011	3.67726	0.09031	23.59	0.58
Integrated		9253.12	11.2439	1676.31	2.048	165.316	0.2849	0.3057	0.5804	5.5336	0.0706	17.49	0.23	0.33465	0.00076	0.01839	4e-05	4.53038	0.01519	29.02	0.14
65SUS BI#L1
Weighted average of J from standards = 3.467e-03 ± 1.088e-05 (1-sigma error)
Days since irradiation = 34
Laser Power	Cumulative	40Ar	±	39Ar	±	38Ar	±	37Ar	±	36Ar	±	% Atm.	±	Ca/K	±	Cl/K	±	40Ar*/39ArK	±	Age	±
(mW)	39Ar	mV	mV	mV	mV	mV	mV	mV	mV	mV	mV	40Ar								(Ma)	(Ma)
300	0.02254	1489.83	23.3835	43.3228	0.6814	1.7562	0.04	0.0058	0.0895	4.726	0.0798	93.79	2.16	0.24674	0.00543	0.00204	0.00022	2.13524	0.7672	13.29	4.76
600	0.10396	2525.34	28.5863	156.483	1.9068	3.7154	0.038	0.0137	0.1284	5.2589	0.0693	61.6	1.07	0.1611	0.00247	0.00148	7e-05	6.18521	0.23719	38.24	1.45
900	0.23484	2943.21	33.2319	251.555	2.8064	5.2456	0.0693	0.0491	0.4931	3.6218	0.053	36.32	0.67	0.35788	0.00537	0.00162	7e-05	7.43293	0.16811	45.85	1.02
1200	0.37291	2834.82	32.0273	265.377	3.2007	5.1127	0.0867	0.0445	0.5666	2.8775	0.0446	29.95	0.58	0.30797	0.0054	0.00143	8e-05	7.46314	0.15876	46.04	0.97
1500	0.50004	2465.36	27.9199	244.358	3.2027	4.7396	0.0639	0.0513	0.7492	2.0591	0.0444	24.58	0.6	0.38526	0.00756	0.00155	7e-05	7.58774	0.16098	46.8	0.98
2000	0.63646	2505.53	28.3663	262.254	3.3878	5.4776	0.0772	0.1252	1.6814	1.6336	0.0229	18.91	0.35	0.87638	0.01633	0.00196	8e-05	7.72538	0.14972	47.63	0.91
2500	0.7617	2241.85	25.4351	240.732	3.3242	4.5244	0.0734	0.0611	0.8084	1.2714	0.0298	16.59	0.44	0.46585	0.00891	0.00155	8e-05	7.74464	0.15503	47.75	0.94
3000	0.81957	1061.32	19.6236	111.24	2.2658	2.2227	0.0514	0.0331	0.7804	0.6913	0.0311	19.05	0.94	0.54637	0.01702	0.00176	0.00013	7.70093	0.25055	47.48	1.52
5000	0.96109	2485.06	28.1379	272.01	2.9953	5.0789	0.0801	0.0716	0.7685	1.2033	0.0243	14.12	0.33	0.48293	0.00743	0.00156	7e-05	7.82216	0.13741	48.22	0.84
9000	1	633.421	7.4962	74.7966	1.0347	1.3144	0.0282	0.0196	0.2503	0.1932	0.0189	8.79	0.89	0.48049	0.00905	0.0014	9e-05	7.69847	0.16453	47.47	1
Integrated		21185.8	83.4158	1922.13	8.3774	39.1875	0.2016	0.4751	2.4275	23.5362	0.1458	32.73	0.24	0.45357	0.00305	0.00161	3e-05	7.39564	0.0586	45.63	0.38
54SUS BI#L1
Weighted average of J from standards = 3.929e-03 ± 8.184e-06 (1-sigma error)
Days since irradiation = 56
Laser Power	Cumulative	40Ar	±	39Ar	±	38Ar	±	37Ar	±	36Ar	±	% Atm.	±	Ca/K	±	Cl/K	±	40Ar*/39ArK	±	Age	±
(mW)	39Ar	mV	mV	mV	mV	mV	mV	mV	mV	mV	mV	40Ar								(Ma)	(Ma)
300	0.00502	250.554	1.1246	11.5695	0.0806	0.332	0.0144	0.0004	0.074	0.7598	0.0287	89.72	3.41	0.07089	0.01175	0.00126	0.00028	2.22328	0.7399	15.67	5.19
600	0.05287	813.293	7.4333	110.292	0.9134	1.7648	0.0336	0.0016	0.0615	1.7306	0.0262	63.11	1.12	0.02734	0.00105	0.00055	7e-05	2.70897	0.09999	19.08	0.7
900	0.16293	1299.96	13.307	253.677	2.536	3.574	0.0563	0.0042	0.0976	2.0046	0.0447	45.81	1.13	0.03062	0.00077	0.00046	5e-05	2.76105	0.07902	19.44	0.55
1200	0.29235	1369.2	13.48	298.291	2.9606	4.0867	0.0409	0.0064	0.0944	1.7869	0.0351	38.78	0.85	0.03941	0.0007	0.00045	4e-05	2.79206	0.06351	19.66	0.44
1500	0.43866	1468.25	14.56	337.228	3.5664	4.6172	0.0528	0.0081	0.0919	1.6959	0.0268	34.32	0.64	0.04418	0.00068	0.00049	4e-05	2.84015	0.05777	20	0.4
2000	0.66682	2213.59	18.1639	525.863	4.2558	7.0062	0.0548	0.0126	0.1013	2.3457	0.0259	31.49	0.43	0.04407	0.0005	0.00043	3e-05	2.86368	0.0442	20.16	0.31
2500	0.80923	1321.03	11.7583	328.251	3.0865	4.3776	0.0769	0.0082	0.0966	1.2691	0.0197	28.55	0.51	0.04588	0.00069	0.00046	6e-05	2.8544	0.0483	20.1	0.34
3000	0.89344	767.798	6.2637	194.091	1.5177	2.526	0.0411	0.0041	0.1	0.709	0.0223	27.45	0.89	0.03908	0.00099	0.0004	5e-05	2.84853	0.05197	20.06	0.36
5000	0.98179	800.424	5.8205	203.635	1.5814	2.6757	0.017	0.0074	0.0773	0.702	0.0216	26.04	0.83	0.06666	0.00087	0.00043	3e-05	2.88536	0.04813	20.31	0.34
9000	1	157.898	0.6422	41.9697	0.1718	0.5307	0.0176	0.0015	0.0682	0.1023	0.0189	19.22	3.57	0.06575	0.00299	0.00037	9e-05	3.01508	0.13481	21.22	0.94
Integrated		10462	34.1907	2304.87	7.8249	31.4909	0.142	0.0547	0.2764	13.1059	0.0886	37.22	0.28	0.04356	0.00027	0.00045	2e-05	2.83113	0.02106	19.93	0.15
15CSR08 BI#L1
Weighted average of J from standards = 4.969e-03 ± 1.797e-05 (1-sigma error)
Days since irradiation = 56
Laser Power	Cumulative	40Ar	±	39Ar	±	38Ar	±	37Ar	±	36Ar	±	% Atm.	±	Ca/K	±	Cl/K	±	40Ar*/39ArK	±	Age	±
(mW)	39Ar	mV	mV	mV	mV	mV	mV	mV	mV	mV	mV	40Ar								(Ma)	(Ma)
500	0.01327	232.69	0.523	20.0317	0.0847	1.1068	0.0272	0.0005	0.0545	0.6675	0.037	84.97	4.72	0.04674	0.00499	0.0081	0.0003	1.74133	0.54661	15.53	4.85
1000	0.11754	536.433	0.6582	157.376	0.4596	8.2344	0.0378	0.0016	0.0797	0.7836	0.0404	43.52	2.25	0.01916	0.00093	0.0086	6e-05	1.90852	0.07623	17.01	0.68
1500	0.26212	524.616	0.585	218.199	0.8309	11.4098	0.0744	0.0014	0.0734	0.2787	0.0302	15.87	1.72	0.01197	0.00062	0.00874	8e-05	1.99766	0.04173	17.8	0.37
2000	0.41365	506.124	0.3641	228.712	0.4995	12.0802	0.0421	0.0017	0.0696	0.1639	0.0173	9.67	1.02	0.01366	0.00056	0.00887	5e-05	1.97215	0.02285	17.57	0.2
2500	0.55497	456.974	0.478	213.287	0.4081	11.4541	0.0912	0.0032	0.1009	0.0803	0.022	5.21	1.45	0.02724	0.00087	0.00907	9e-05	2.00286	0.03086	17.85	0.27
3000	0.6699	367.389	0.6051	173.465	0.2601	9.3177	0.0606	0.0018	0.0561	0.0618	0.0178	5	1.45	0.01953	0.00059	0.00907	8e-05	1.98385	0.0307	17.68	0.27
5000	0.92463	808.698	0.9443	384.455	0.9615	20.6195	0.1478	0.0053	0.1034	0.0873	0.0165	3.18	0.61	0.02528	0.0005	0.00906	9e-05	2.00784	0.01389	17.89	0.12
9000	1	251.303	0.3291	113.754	0.2867	6.2183	0.0445	0.0015	0.0566	0.0613	0.0183	7.26	2.18	0.02385	0.00092	0.00927	9e-05	2.02133	0.04786	18.01	0.42
Integrated		3684.23	1.6662	1509.28	1.5489	80.4408	0.2128	0.0171	0.2163	2.1844	0.075	17.7	0.61	0.02075	0.00026	0.00894	3e-05	1.98462	0.01487	17.68	0.15
60SUS BI#L1
Weighted average of J from standards = 3.908e-03 ± 1.404e-05 (1-sigma error)
Days since irradiation = 56
Laser Power	Cumulative	40Ar	±	39Ar	±	38Ar	±	37Ar	±	36Ar	±	% Atm.	±	Ca/K	±	Cl/K	±	40Ar*/39ArK	±	Age	±
(mW)	39Ar	mV	mV	mV	mV	mV	mV	mV	mV	mV	mV	40Ar								(Ma)	(Ma)
300	0.01237	636.502	2.5985	25.2931	0.1111	1.4357	0.0194	0.0008	0.0668	2.1396	0.0316	99.44	1.52	0.05625	0.00485	0.00641	0.00017	0.14108	0.38266	0.99	2.69
600	0.19113	1466.85	5.0236	365.467	1.2406	13.9512	0.1013	0.0015	0.0839	2.0256	0.0278	41.1	0.58	0.00731	0.00042	0.00561	6e-05	2.34648	0.02755	16.45	0.19
900	0.42388	1370.98	5.9324	475.827	2.2443	18.8752	0.1196	0.0011	0.0749	0.6312	0.0278	13.74	0.61	0.00431	0.00029	0.00609	7e-05	2.45973	0.02431	17.24	0.17
1200	0.53523	660.942	5.7566	227.645	1.9443	9.8635	0.1023	0.0006	0.0538	0.3248	0.0194	14.66	0.88	0.00516	0.00044	0.00685	0.00012	2.45231	0.04148	17.19	0.29
1500	0.64332	632.272	5.3529	220.991	1.9139	9.22	0.0642	0.0007	0.0814	0.2885	0.0221	13.62	1.05	0.00575	0.00068	0.00652	0.0001	2.44589	0.04383	17.14	0.31
2000	0.80027	847.061	7.0907	320.877	2.5732	12.9481	0.0922	0.0005	0.0582	0.1582	0.0241	5.58	0.85	0.00294	0.00033	0.00626	9e-05	2.46454	0.03716	17.27	0.26
2500	0.89965	521.517	3.6308	203.177	1.4259	9.71	0.1002	0.0002	0.052	0.0708	0.0179	4.06	1.03	0.0014	0.00047	0.00783	0.00013	2.43421	0.03603	17.06	0.25
3000	0.91493	80.9845	0.4132	31.2327	0.1566	1.1991	0.0126	0	0.0554	-0.006	0.0184	-2.22	6.8	0.00087	0.00326	0.00588	0.0001	2.62024	0.17523	18.36	1.22
5000	0.96451	264.447	0.8845	101.367	0.4135	3.9717	0.0474	0.0001	0.0511	0.0225	0.0171	2.54	1.93	0.00186	0.00092	0.00603	0.0001	2.51364	0.05154	17.62	0.36
9000	1	194.019	0.6691	72.5514	0.2483	3.4842	0.0242	0.0001	0.0586	0.0105	0.0216	1.61	3.33	0.00161	0.00148	0.00789	8e-05	2.60189	0.08901	18.23	0.62
Integrated		6675.57	13.9225	2044.43	4.7899	84.6586	0.2471	0.0055	0.2046	5.6657	0.0735	25.3	0.33	0.00496	0.00018	0.00639	3e-05	2.41687	0.01386	16.94	0.11
15CSR07B BI#L1
Weighted average of J from standards = 4.969e-03 ± 1.797e-05 (1-sigma error)
Days since irradiation = 56
Laser Power	Cumulative	40Ar	±	39Ar	±	38Ar	±	37Ar	±	36Ar	±	% Atm.	±	Ca/K	±	Cl/K	±	40Ar*/39ArK	±	Age	±
(mW)	39Ar	mV	mV	mV	mV	mV	mV	mV	mV	mV	mV	40Ar								(Ma)	(Ma)
500	0.02192	291.832	0.3351	24.3348	0.0916	1.6338	0.035	0.0022	0.0674	0.8382	0.031	85.02	3.15	0.16293	0.00512	0.01056	0.00031	1.79204	0.377	15.98	3.35
1000	0.16436	500.519	0.4868	158.101	0.6968	4.052	0.0523	0.0015	0.0573	0.5826	0.0391	34.7	2.33	0.01685	0.00067	0.00305	7e-05	2.04797	0.07372	18.25	0.65
1500	0.31832	387.177	0.4689	170.892	0.5611	3.6763	0.0477	0.0011	0.0903	0.1117	0.0235	8.62	1.82	0.01215	0.00097	0.0023	6e-05	2.0433	0.04124	18.2	0.37
2000	0.52134	494.472	0.669	225.358	0.9084	4.4143	0.0342	0.0034	0.1231	0.0536	0.0299	3.19	1.81	0.02741	0.00101	0.00191	4e-05	2.09541	0.04027	18.67	0.36
2500	0.7589	573.659	0.7678	263.684	0.9695	4.6965	0.0412	0.004	0.0967	0.0573	0.0231	2.94	1.21	0.02795	0.00068	0.00154	4e-05	2.08286	0.0272	18.55	0.24
3000	0.89295	325.389	0.4443	148.799	0.4611	2.5241	0.0267	0.0035	0.0675	0.0391	0.024	3.51	2.21	0.04277	0.00084	0.00136	4e-05	2.08145	0.04819	18.54	0.43
5000	0.98931	236.266	0.5902	106.965	0.2613	1.7954	0.043	0.01	0.1464	0.0496	0.0232	5.93	2.94	0.17198	0.00255	0.00132	9e-05	2.05008	0.06441	18.26	0.57
9000	1	40.3291	0.2335	11.8653	0.0844	0.2338	0.0175	0.0005	0.0655	-0.003	0.0238	-2.36	17.57	0.08243	0.01014	0.00196	0.00032	3.44891	0.59295	30.62	5.22
Integrated		2849.64	1.4854	1110	1.6917	23.0263	0.1094	0.0262	0.266	1.729	0.0784	18.06	0.82	0.04324	0.00044	0.0021	2e-05	2.07923	0.02116	18.52	0.2
67SUS BI#L1
Weighted average of J from standards = 3.908e-03 ± 1.404e-05 (1-sigma error)
Days since irradiation = 56
Laser Power	Cumulative	40Ar	±	39Ar	±	38Ar	±	37Ar	±	36Ar	±	% Atm.	±	Ca/K	±	Cl/K	±	40Ar*/39ArK	±	Age	±
(mW)	39Ar	mV	mV	mV	mV	mV	mV	mV	mV	mV	mV	40Ar								(Ma)	(Ma)
300	0.01087	732.718	7.4611	26.0551	0.2457	0.9514	0.0208	0.0017	0.0474	2.3753	0.0381	95.88	1.82	0.11665	0.00351	0.0019	0.00018	1.15781	0.5182	8.14	3.63
600	0.08748	2114.54	18.9537	183.717	1.7538	3.5931	0.0415	0.0033	0.0738	3.9172	0.0446	54.87	0.8	0.03278	0.0008	0.00108	6e-05	5.18106	0.13515	36.12	0.93
900	0.24603	2865.24	11.0061	380.195	2.4013	6.0924	0.0552	0.0047	0.0871	1.971	0.0294	20.39	0.31	0.02255	0.00044	0.00097	4e-05	5.97567	0.05289	41.6	0.36
1200	0.41827	2985.17	11.4562	413.02	2.3623	6.4016	0.0458	0.0057	0.0863	1.5339	0.0285	15.23	0.29	0.02523	0.00041	0.00092	3e-05	6.10169	0.04913	42.47	0.34
1500	0.56908	2537.21	9.7744	361.631	2.2367	5.6544	0.069	0.0065	0.0889	1.1202	0.0234	13.08	0.28	0.03278	0.00049	0.00097	4e-05	6.07254	0.05021	42.27	0.35
2000	0.72461	2601.99	10.0176	372.963	2.2301	5.7449	0.0401	0.0096	0.0793	1.1359	0.0257	12.92	0.3	0.04736	0.00048	0.00092	3e-05	6.04912	0.04957	42.11	0.34
2500	0.8015	1249.21	8.2849	184.392	1.3075	2.7614	0.0376	0.0064	0.1117	0.4523	0.0191	10.7	0.46	0.06327	0.0012	0.00086	5e-05	6.02317	0.06924	41.93	0.48
3000	0.84493	702.806	4.4516	104.138	0.7331	1.568	0.0268	0.0042	0.0701	0.2647	0.0183	11.13	0.77	0.07395	0.00134	0.00087	6e-05	5.9714	0.07937	41.57	0.55
5000	0.94805	1617.14	9.6455	247.3	1.4518	3.6942	0.0446	0.025	0.2469	0.4122	0.0171	7.44	0.32	0.1855	0.00213	0.00088	4e-05	6.02575	0.05657	41.95	0.39
9000	1	792.306	4.3852	124.571	0.7779	1.8648	0.0309	0.0129	0.1354	0.1596	0.0154	5.84	0.58	0.18963	0.00232	0.0009	6e-05	5.96107	0.06305	41.5	0.43
Integrated		18198.3	32.6175	2397.98	5.424	38.3262	0.1369	0.0798	0.3655	13.3422	0.0869	21.71	0.15	0.06107	0.00031	0.00095	1e-05	5.91806	0.02192	41.2	0.21
15CSR10 BI#L1
Weighted average of J from standards = 4.969e-03 ± 1.797e-05 (1-sigma error)
Days since irradiation = 56
Laser Power	Cumulative	40Ar	±	39Ar	±	38Ar	±	37Ar	±	36Ar	±	% Atm.	±	Ca/K	±	Cl/K	±	40Ar*/39ArK	±	Age	±
(mW)	39Ar	mV	mV	mV	mV	mV	mV	mV	mV	mV	mV	40Ar								(Ma)	(Ma)
500	0.02411	461.644	0.2604	27.0904	0.076	0.7442	0.0174	0.0011	0.0885	1.2949	0.0282	83.01	1.81	0.0757	0.006	0.0017	0.00014	2.8902	0.3076	25.7	2.72
1000	0.2806	1020.77	0.9683	288.151	0.3898	4.2648	0.0534	0.0025	0.1101	0.6084	0.0234	17.74	0.68	0.01594	0.0007	0.00083	4e-05	2.88964	0.02457	25.69	0.22
1500	0.45966	668.135	0.7888	201.162	0.4926	2.9064	0.0355	0.0019	0.0944	0.2224	0.0121	9.9	0.54	0.01706	0.00086	0.0008	4e-05	2.96571	0.01966	26.36	0.17
2000	0.68372	799.081	0.8387	251.721	0.4347	3.5654	0.0486	0.0027	0.0931	0.124	0.0174	4.6	0.65	0.0199	0.00068	0.00076	4e-05	3.00014	0.02138	26.67	0.19
2500	0.84087	543.533	0.5116	176.553	0.3754	2.4896	0.0279	0.0031	0.0854	0.0581	0.011	3.14	0.6	0.03261	0.00089	0.00076	3e-05	2.95313	0.01969	26.25	0.17
3000	0.91856	267.028	0.4897	87.2863	0.2537	1.2471	0.0308	0.0025	0.0872	0.0182	0.0137	1.96	1.53	0.05226	0.00184	0.0008	7e-05	2.97032	0.04741	26.4	0.42
5000	0.97591	195.339	0.3496	64.4301	0.3013	0.9386	0.0183	0.0063	0.1035	0.0255	0.0191	3.63	2.92	0.17989	0.00307	0.00085	6e-05	2.89325	0.08883	25.72	0.78
9000	1	82.3248	0.2653	27.0667	0.1289	0.3734	0.0391	0.0047	0.1028	0.0208	0.0366	7.06	13.28	0.32015	0.00713	0.00068	0.00031	2.7997	0.40042	24.9	3.54
Integrated		4037.85	1.7393	1123.46	0.9497	16.5295	0.1018	0.0249	0.2715	2.3723	0.0617	17.45	0.46	0.04064	0.00044	0.00081	2e-05	2.94232	0.0165	26.16	0.17
91SUS BI#L1
Weighted average of J from standards = 3.916e-03 ± 3.742e-05 (1-sigma error)
Days since irradiation = 75
Laser Power	Cumulative	40Ar	±	39Ar	±	38Ar	±	37Ar	±	36Ar	±	% Atm.	±	Ca/K	±	Cl/K	±	40Ar*/39ArK	±	Age	±
(mW)	39Ar	mV	mV	mV	mV	mV	mV	mV	mV	mV	mV	40Ar								(Ma)	(Ma)
500	0.05176	2529.63	5.445	114.427	1.3319	6.2242	0.0559	0.0151	0.1964	7.7253	0.0617	90.32	0.75	0.24282	0.00423	0.00658	0.00015	2.13819	0.1681	15.03	1.18
1000	0.25225	4050.72	8.4537	443.198	4.2733	16.2019	0.1651	0.0182	0.1334	5.4822	0.0463	40.09	0.35	0.07517	0.00091	0.005	0.0001	5.45833	0.06416	38.11	0.44
1500	0.51664	4329.2	9.0035	584.451	4.8828	20.2029	0.1435	0.0325	0.2163	2.7726	0.0374	18.94	0.26	0.10204	0.00109	0.00488	8e-05	5.9806	0.05583	41.72	0.38
2000	0.70116	2872.43	6.1145	407.916	3.5211	14.3412	0.1449	0.0314	0.2745	1.3853	0.0343	14.22	0.36	0.14133	0.00174	0.00506	0.0001	6.01519	0.05972	41.96	0.41
2500	0.81564	1736.27	17.0742	253.1	2.417	8.774	0.1068	0.0529	0.5456	0.7357	0.026	12.32	0.46	0.38325	0.00539	0.00498	0.00011	5.98952	0.09369	41.78	0.65
3000	0.87723	911.063	7.3227	136.176	1.1231	4.5558	0.0466	0.0445	0.4214	0.3354	0.0358	10.52	1.17	0.59917	0.00753	0.00474	9e-05	5.9611	0.1066	41.58	0.74
3500	0.92349	680.69	5.0783	102.272	0.8723	3.3815	0.046	0.0419	0.3988	0.2713	0.0193	11.32	0.85	0.75153	0.00961	0.00465	0.00011	5.87746	0.09016	41.01	0.62
4000	0.94443	295.938	1.6651	46.3134	0.3668	1.0837	0.0305	0.0131	0.1501	0.1052	0.0222	10.19	2.23	0.52073	0.00724	0.00264	0.00014	5.71339	0.15309	39.88	1.06
4500	0.95567	153.197	1.2663	24.8575	0.1703	0.4861	0.0305	0.0142	0.1174	0.0501	0.0304	8.94	5.89	1.05008	0.01127	0.00184	0.00026	5.58731	0.36679	39	2.53
5000	0.96858	170.465	1.2927	28.5296	0.1504	0.5664	0.0232	0.0058	0.1223	0.0491	0.0295	8.28	5.14	0.37213	0.00811	0.00191	0.00018	5.45413	0.3102	38.08	2.14
6000	0.99326	327.599	1.4668	54.5575	0.4125	1.3279	0.0375	0.0086	0.1116	0.0774	0.0241	6.8	2.18	0.28818	0.00434	0.00287	0.00015	5.56907	0.1396	38.88	0.96
9000	1	79.8835	1.4137	14.9054	0.1058	0.0119	0.0188	0.0019	0.0543	0.033	0.0188	12.07	7	0.23938	0.00689	-0.00211	0.00027	4.68683	0.38614	32.78	2.68
Integrated		18137.1	24.5092	2210.7	8.0316	77.1575	0.3031	0.2801	0.9378	19.0226	0.1186	30.98	0.2	0.23247	0.00115	0.0048	4e-05	5.64275	0.02827	39.39	0.42
06BAL BI#L1
Weighted average of J from standards = 4.006e-03 ± 1.480e-05 (1-sigma error)
Days since irradiation = 39
Laser Power	Cumulative	40Ar	±	39Ar	±	38Ar	±	37Ar	±	36Ar	±	% Atm.	±	Ca/K	±	Cl/K	±	40Ar*/39ArK	±	Age	±
(mW)	39Ar	mV	mV	mV	mV	mV	mV	mV	mV	mV	mV	40Ar								(Ma)	(Ma)
300	0.00798	3243.11	4.7327	49.555	0.1774	5.441	0.0427	0.0019	0.0333	10.8817	0.1004	99.19	0.93	0.07045	0.00126	0.01225	0.0002	0.52983	0.60608	3.82	4.37
600	0.05776	5149.93	7.435	309.313	1.4837	10.1507	0.0861	0.0079	0.0532	14.7239	0.1152	84.62	0.67	0.04689	0.00039	0.00283	6e-05	2.55562	0.11337	18.36	0.81
900	0.14065	4909.45	7.1196	514.996	4.0523	12.2673	0.0944	0.0131	0.1545	10.9062	0.1015	65.83	0.62	0.04672	0.00066	0.00198	5e-05	3.24756	0.06519	23.29	0.46
1200	0.26255	6121.78	8.8103	757.36	2.3482	16.3618	0.0785	0.0233	0.1654	11.8062	0.06	57.17	0.3	0.05639	0.00044	0.00173	3e-05	3.44952	0.02829	24.73	0.2
1500	0.39318	5756.89	8.2914	811.683	1.903	16.7352	0.067	0.0345	0.1498	9.607	0.0526	49.47	0.28	0.07795	0.00038	0.00167	2e-05	3.56892	0.02329	25.58	0.17
2000	0.56696	7107.94	10.23	1079.71	3.4592	21.5927	0.0792	0.0826	0.2556	10.7224	0.0452	44.68	0.2	0.14044	0.00063	0.00162	2e-05	3.62546	0.01949	25.98	0.14
2500	0.7134	5942.45	8.5728	909.907	2.1593	18.0424	0.0667	0.1058	0.3875	8.76	0.0428	43.61	0.22	0.21347	0.00093	0.0016	2e-05	3.66615	0.01896	26.27	0.13
3000	0.82763	4457.12	6.4678	709.835	1.8228	13.9432	0.0622	0.1372	0.2511	6.1896	0.0458	40.98	0.31	0.35468	0.00112	0.00159	2e-05	3.68913	0.0232	26.44	0.17
5000	0.96477	4822.26	6.9838	852.136	2.0766	16.2879	0.0583	0.1798	0.3824	5.4774	0.0364	33.43	0.23	0.38728	0.00125	0.00157	2e-05	3.74786	0.01764	26.86	0.13
9000	1	1223.06	1.3831	218.947	0.5073	4.1373	0.0283	0.0642	0.1528	1.2826	0.0245	30.72	0.6	0.53801	0.00179	0.00155	3e-05	3.85029	0.03483	27.58	0.25
Integrated		48734	23.3538	6213.44	7.2326	134.959	0.2181	0.6504	0.7251	90.357	0.2189	54.89	0.14	0.19207	0.00031	0.0018	1e-05	3.52529	0.01182	25.27	0.13
23BAL BI#L1
Weighted average of J from standards = 6.956e-03 ± 2.757e-05 (1-sigma error)
Days since irradiation = 54
Laser Power	Cumulative	40Ar	±	39Ar	±	38Ar	±	37Ar	±	36Ar	±	% Atm.	±	Ca/K	±	Cl/K	±	40Ar*/39ArK	±	Age	±
(mW)	39Ar	mV	mV	mV	mV	mV	mV	mV	mV	mV	mV	40Ar								(Ma)	(Ma)
400	0.00762	298.736	0.8954	21.5718	0.0662	0.5349	0.0157	0.0013	0.037	0.8622	0.0267	85.44	2.66	0.11224	0.00317	0.00145	0.00016	2.01253	0.36803	25.05	4.55
600	0.04497	299.788	1.3098	105.752	0.4896	1.736	0.0171	0.0023	0.0315	0.2836	0.0159	28.18	1.59	0.03971	0.00058	0.00115	4e-05	2.01461	0.0472	25.08	0.58
1000	0.15975	843.678	3.9682	325.001	1.1522	5.266	0.0445	0.0045	0.0533	0.3645	0.0178	12.87	0.63	0.02556	0.00031	0.00117	3e-05	2.23598	0.02182	27.81	0.27
1250	0.26973	750.824	3.6046	311.402	1.1018	5.0747	0.0504	0.0039	0.0622	0.1095	0.0191	4.32	0.76	0.02302	0.00038	0.00122	4e-05	2.27856	0.02302	28.34	0.28
1750	0.42856	1073.52	4.5742	449.718	1.2571	7.3077	0.035	0.0066	0.0482	0.0836	0.0197	2.28	0.55	0.02713	0.00021	0.00121	2e-05	2.30369	0.01769	28.65	0.22
2000	0.56359	913.152	3.6982	382.319	1.4431	6.1339	0.0269	0.0085	0.0385	0.0485	0.02	1.51	0.65	0.04074	0.00024	0.00117	2e-05	2.32314	0.02027	28.89	0.25
3000	0.80809	1667.71	7.1173	692.358	1.8437	11.2295	0.0519	0.0934	0.5178	0.1012	0.0189	1.35	0.34	0.24758	0.00152	0.00121	2e-05	2.34721	0.01451	29.18	0.18
6000	0.99572	1268.21	7.2766	531.427	2.548	8.5541	0.0688	0.2365	1.0515	0.0977	0.0206	0.75	0.48	0.81684	0.00534	0.00119	3e-05	2.33982	0.02115	29.09	0.26
9000	1	26.5401	0.2944	12.1194	0.1168	0.1774	0.0132	0.0052	0.0699	0.0251	0.0176	26.69	19.87	0.78169	0.01299	0.00081	0.00024	1.5842	0.43027	19.75	5.33
Integrated		7142.16	13.0211	2831.67	4.044	46.0141	0.1209	0.3623	1.1797	1.9759	0.0593	7.85	0.25	0.23476	0.00083	0.00119	1e-05	2.29711	0.0084	28.57	0.15
21BAL BI#L1
Weighted average of J from standards = 3.863e-03 ± 1.394e-05 (1-sigma error)
Days since irradiation = 38
Laser Power	Cumulative	40Ar	±	39Ar	±	38Ar	±	37Ar	±	36Ar	±	% Atm.	±	Ca/K	±	Cl/K	±	40Ar*/39ArK	±	Age	±
(mW)	39Ar	mV	mV	mV	mV	mV	mV	mV	mV	mV	mV	40Ar								(Ma)	(Ma)
600	0.15101	2117.83	3.9121	399.959	0.9389	6.6157	0.0482	0.0064	0.0797	2.2861	0.0191	32.05	0.27	0.0294	0.00037	0.00106	3e-05	3.57779	0.01915	24.74	0.13
900	0.39578	2695.73	3.4678	648.293	1.1444	10.1413	0.0544	0.0096	0.0665	0.8874	0.0239	9.77	0.26	0.02705	0.00019	0.00104	2e-05	3.72525	0.01382	25.75	0.09
1200	0.58168	2007.37	3.5978	492.394	1.2104	7.7131	0.0631	0.0102	0.1276	0.478	0.0183	7.05	0.27	0.03803	0.00048	0.00106	3e-05	3.76194	0.01614	26	0.11
1500	0.71204	1387.12	1.9066	345.269	0.7095	5.4503	0.0387	0.0162	0.0854	0.2874	0.0171	6.07	0.37	0.08599	0.00049	0.00109	2e-05	3.74583	0.01749	25.89	0.12
2000	0.83213	1274.05	2.0457	318.132	0.508	4.9509	0.0351	0.0742	0.1437	0.2681	0.0269	5.78	0.63	0.4281	0.00107	0.00105	2e-05	3.74587	0.02649	25.89	0.18
2500	0.9062	787.582	1.2623	196.217	0.4256	3.124	0.0298	0.0767	0.3019	0.1692	0.0229	5.59	0.86	0.7174	0.00322	0.00112	3e-05	3.76255	0.03599	26.01	0.25
3000	0.94979	462.301	0.8069	115.497	0.3203	1.8347	0.0255	0.0696	0.1998	0.1042	0.0286	5.46	1.84	1.10562	0.00442	0.00112	5e-05	3.75765	0.07426	25.97	0.51
5000	0.98826	413.955	0.9089	101.968	0.2428	1.6443	0.0292	0.0803	0.1986	0.1232	0.0236	7.25	1.7	1.44645	0.00497	0.00116	6e-05	3.73997	0.06971	25.85	0.48
9000	1	122.254	1.12	31.0876	0.1424	0.4528	0.0235	0.0081	0.0582	0.0211	0.0255	4.59	6.21	0.4785	0.00408	0.00084	0.00016	3.72439	0.24562	25.74	1.69
Integrated		11268.2	7.2401	2648.82	2.1865	41.9272	0.1222	0.3513	0.4784	4.6248	0.0695	11.95	0.18	0.24335	0.00039	0.00106	1e-05	3.71969	0.00879	25.71	0.11
01BAL BI#L1
Weighted average of J from standards = 3.995e-03 ± 1.267e-05 (1-sigma error)
Days since irradiation = 106
Laser Power	Cumulative	40Ar	±	39Ar	±	38Ar	±	37Ar	±	36Ar	±	% Atm.	±	Ca/K	±	Cl/K	±	40Ar*/39ArK	±	Age	±
(mW)	39Ar	mV	mV	mV	mV	mV	mV	mV	mV	mV	mV	40Ar								(Ma)	(Ma)
300	0.00525	184.278	0.7671	10.2562	0.067	0.3244	0.011	0.0004	0.2729	0.4912	0.0174	78.88	2.82	0.07332	0.04883	0.00257	0.00024	3.78776	0.50781	27.07	3.6
600	0.05975	478.474	1.7083	106.479	0.3444	2.0994	0.0251	0.0024	0.284	0.2941	0.0136	18.24	0.85	0.04054	0.0049	0.00184	5e-05	3.64964	0.04268	26.09	0.3
900	0.19273	1100.09	4.5417	259.778	1.0825	5.2789	0.031	0.0036	0.2774	0.182	0.0141	4.9	0.38	0.0251	0.00196	0.00205	3e-05	3.99913	0.02904	28.57	0.21
1200	0.33262	1130.88	4.5513	273.278	1.1697	5.4865	0.0462	0.0041	0.3077	0.0778	0.0113	2.02	0.3	0.02775	0.00207	0.00201	4e-05	4.02563	0.02699	28.75	0.19
1500	0.43366	814.8	7.2665	197.394	1.8253	3.8909	0.0612	0.0042	0.2965	0.0655	0.0111	2.35	0.41	0.03946	0.00278	0.00193	8e-05	4.00182	0.05496	28.58	0.39
1750	0.53225	799.478	3.5607	192.597	0.7986	3.8272	0.0185	0.0038	0.1145	0.0431	0.0149	1.56	0.56	0.03599	0.0011	0.00197	3e-05	4.05694	0.03398	28.98	0.24
2000	0.63447	841.408	3.687	199.688	0.8705	4.0755	0.0369	0.0043	0.1479	0.0633	0.0161	2.2	0.57	0.03953	0.00137	0.00208	4e-05	4.09206	0.03513	29.22	0.25
2500	0.75887	1036.04	4.4558	243.038	1.2034	5.0362	0.0278	0.0149	0.2519	0.0709	0.0137	1.92	0.39	0.11216	0.00198	0.00215	3e-05	4.15213	0.03232	29.65	0.23
3000	0.86446	888.087	3.7114	206.282	0.885	4.227	0.0344	0.033	0.2016	0.0641	0.0162	1.84	0.54	0.29372	0.00219	0.0021	4e-05	4.19732	0.03454	29.97	0.24
4000	0.94226	646.918	3.1773	152.023	0.7446	3.1315	0.0268	0.035	0.3514	0.0562	0.0121	2.14	0.56	0.4223	0.00472	0.00212	4e-05	4.13604	0.03747	29.54	0.27
5000	0.96746	202.352	0.8862	49.2202	0.2434	0.9379	0.0109	0.0106	0.1773	0.0177	0.0125	2.17	1.84	0.39644	0.0069	0.0018	5e-05	3.99336	0.07963	28.52	0.56
6000	0.98179	115.636	0.505	27.9984	0.1471	0.5525	0.019	0.005	0.0804	0.0124	0.0103	2.82	2.65	0.3303	0.00555	0.00194	0.00014	3.98534	0.11213	28.47	0.79
9000	1	147.789	0.6264	35.5849	0.1738	0.6669	0.0094	0.0047	0.1371	0.0181	0.0104	3.38	2.1	0.24482	0.00717	0.00173	6e-05	3.98443	0.09049	28.46	0.64
Integrated		8386.23	13.0031	1953.62	3.2073	39.5348	0.112	0.126	0.8567	1.4566	0.0489	5.04	0.17	0.11839	0.00083	0.00203	1e-05	4.04815	0.01199	28.91	0.12
32RAP BI#L1
Weighted average of J from standards = 3.415e-03 ± 1.053e-05 (1-sigma error)
Days since irradiation = 30
Laser Power	Cumulative	40Ar	±	39Ar	±	38Ar	±	37Ar	±	36Ar	±	% Atm.	±	Ca/K	±	Cl/K	±	40Ar*/39ArK	±	Age	±
(mW)	39Ar	mV	mV	mV	mV	mV	mV	mV	mV	mV	mV	40Ar								(Ma)	(Ma)
250	0.00112	77.4775	0.9902	1.3684	0.029	0.1596	0.0173	0	0.0317	0.2705	0.0216	103.24	8.36	0.01968	0.04248	0.01455	0.00275	-1.83086	4.72999	-11.3	29.29
400	0.01004	120.364	1.4506	10.9449	0.1725	0.7851	0.0199	0.0001	0.0314	0.2712	0.0161	66.76	4.04	0.01354	0.00527	0.0119	0.00044	3.64613	0.45799	22.3	2.78
550	0.05971	339.489	3.8962	60.8988	0.6364	4.1408	0.0504	0.0001	0.0321	0.2895	0.0145	25.33	1.3	0.0027	0.00097	0.0119	0.00023	4.14015	0.10466	25.3	0.64
700	0.13911	457.335	5.6229	97.349	1.2079	6.5571	0.0992	0.0001	0.0325	0.1712	0.0123	11.13	0.81	0.00164	0.00061	0.01188	0.00028	4.14875	0.08619	25.35	0.52
850	0.22553	467.559	5.6961	105.951	1.3403	7.207	0.0958	0.0001	0.0345	0.0703	0.0188	4.47	1.2	0.00155	0.0006	0.01207	0.00026	4.18724	0.09214	25.59	0.56
1000	0.29979	394.983	4.8722	91.0455	1.1733	6.072	0.0802	0.0001	0.037	0.0526	0.0136	3.96	1.03	0.00157	0.00075	0.01179	0.00026	4.13791	0.08776	25.29	0.53
1250	0.38304	439.336	5.499	102.075	1.2042	6.7203	0.0647	0.0002	0.0357	0.0264	0.0141	1.78	0.96	0.00296	0.00064	0.01162	0.00021	4.19809	0.084	25.65	0.51
1500	0.47424	481.926	5.913	111.821	1.39	7.4582	0.1005	0.0003	0.0336	0.0467	0.0191	2.88	1.18	0.0043	0.00055	0.0118	0.00026	4.15675	0.08972	25.4	0.54
1750	0.56146	458.72	5.2776	106.931	1.2677	7.0622	0.0639	0.0002	0.0312	0.0427	0.0162	2.76	1.05	0.00342	0.00054	0.01166	0.00021	4.14238	0.08305	25.32	0.5
2000	0.65805	508.604	5.2649	118.424	1.2211	7.9248	0.0798	0.002	0.0455	0.0197	0.0161	1.12	0.94	0.03123	0.00078	0.01185	0.0002	4.21743	0.07428	25.77	0.45
2500	0.7987	734.453	4.2406	172.446	0.9541	11.6476	0.079	0.0013	0.0393	0.0242	0.0177	0.97	0.72	0.01387	0.00042	0.01199	0.00012	4.1885	0.04555	25.6	0.28
3000	0.9227	641.613	4.1804	152.036	0.9013	10.2794	0.0761	0.0004	0.0298	0.0224	0.0157	1.03	0.73	0.0043	0.00036	0.012	0.00013	4.14712	0.04795	25.34	0.29
5000	0.99183	360.425	4.5118	84.7578	1.0536	5.7815	0.1128	0.0003	0.0371	0.0368	0.0198	3.03	1.63	0.00569	0.00081	0.01212	0.00033	4.09476	0.10112	25.03	0.61
9000	1	44.0011	0.5873	10.0185	0.1217	0.6896	0.0198	0	0.032	0.0074	0.0167	5.01	11.32	-0.00054	0.00586	0.01223	0.00046	4.14361	0.49993	25.32	3.03
Integrated		5526.29	16.8226	1226.07	3.7941	82.4853	0.2803	0.005	0.13	1.3516	0.0629	7.27	0.34	0.00748	0.0002	0.01189	6e-05	4.15221	0.02419	25.38	0.17
27RAP BI#L1
Weighted average of J from standards = 4.006e-03 ± 1.480e-05 (1-sigma error)
Days since irradiation = 36
Laser Power	Cumulative	40Ar	±	39Ar	±	38Ar	±	37Ar	±	36Ar	±	% Atm.	±	Ca/K	±	Cl/K	±	40Ar*/39ArK	±	Age	±
(mW)	39Ar	mV	mV	mV	mV	mV	mV	mV	mV	mV	mV	40Ar								(Ma)	(Ma)
300	0.00693	2762.78	5.4162	30.6054	0.102	6.5584	0.0663	0.0006	0.0434	9.1617	0.0321	98.02	0.39	0.03539	0.0026	0.03106	0.00047	1.78509	0.35724	12.84	2.56
600	0.08166	2376.87	5.1861	329.895	0.8465	7.7455	0.0515	0.0007	0.0341	4.9432	0.0206	61.71	0.29	0.00407	0.00019	0.00215	3e-05	2.7476	0.02524	19.73	0.18
900	0.32844	3684	3.7233	1089.52	2.6199	21.7825	0.101	0.0014	0.0379	2.1235	0.0264	17.18	0.21	0.0023	6e-05	0.00193	2e-05	2.77577	0.01041	19.93	0.07
1200	0.50613	2514.69	4.6822	784.5	1.868	15.3623	0.089	0.0015	0.0399	0.9313	0.0253	11.04	0.3	0.00357	9e-05	0.00187	3e-05	2.82516	0.01314	20.28	0.09
1500	0.63905	1915.1	4.4959	586.849	1.6129	11.439	0.03	0.002	0.0359	0.8174	0.0267	12.72	0.42	0.00626	0.00011	0.00185	2e-05	2.82235	0.01733	20.26	0.12
2000	0.75679	1768.32	4.1701	519.81	1.6236	10.1095	0.067	0.003	0.0461	0.9706	0.0447	16.35	0.75	0.0105	0.00017	0.00182	3e-05	2.82091	0.0281	20.25	0.2
2500	0.83965	1209.97	5.2648	365.791	1.612	7.0729	0.0706	0.0017	0.0405	0.5768	0.0326	14.2	0.81	0.00876	0.00021	0.00181	4e-05	2.81256	0.03255	20.19	0.23
3000	0.88969	725.774	1.1052	220.934	0.4291	4.2332	0.0365	0.0012	0.0572	0.3101	0.0199	12.73	0.82	0.00977	0.00048	0.00178	4e-05	2.84095	0.02769	20.39	0.2
5000	0.96985	1165.57	4.9409	353.901	1.812	6.8486	0.0663	0.0032	0.069	0.5526	0.0362	14.11	0.93	0.01679	0.00037	0.00181	4e-05	2.80317	0.03634	20.12	0.26
9000	1	443.989	0.8183	133.11	0.2992	2.6191	0.0232	0.0019	0.0505	0.23	0.0215	15.41	1.44	0.02646	0.0007	0.00187	4e-05	2.79639	0.04843	20.08	0.35
Integrated		18567.1	13.5514	4414.91	4.7406	93.771	0.2044	0.0173	0.1474	20.6172	0.0935	33.04	0.15	0.00718	6e-05	0.00208	1e-05	2.79621	0.0076	20.07	0.09
33RAP BI#L1
Weighted average of J from standards = 4.006e-03 ± 1.480e-05 (1-sigma error)
Days since irradiation = 36
Laser Power	Cumulative	40Ar	±	39Ar	±	38Ar	±	37Ar	±	36Ar	±	% Atm.	±	Ca/K	±	Cl/K	±	40Ar*/39ArK	±	Age	±
(mW)	39Ar	mV	mV	mV	mV	mV	mV	mV	mV	mV	mV	40Ar								(Ma)	(Ma)
300	0.00587	1644.68	3.2215	17.376	0.0791	3.5578	0.0436	0.0007	0.0424	5.3974	0.034	97	0.64	0.07518	0.00449	0.02861	0.00055	2.83707	0.60745	20.37	4.34
600	0.09797	1913.48	4.0497	272.481	0.6694	13.7982	0.048	0.0007	0.04	4.0573	0.0311	62.92	0.5	0.00446	0.00027	0.00786	4e-05	2.5929	0.03738	18.62	0.27
900	0.28111	1929.92	3.6768	541.887	1.1578	26.568	0.0637	0.0004	0.0418	1.5759	0.0335	24.33	0.52	0.00144	0.00014	0.00799	3e-05	2.6725	0.0203	19.19	0.15
1200	0.49362	1857.59	3.3822	628.765	1.0745	30.2336	0.0505	0.0003	0.0544	0.5082	0.0297	8.16	0.48	0.00099	0.00016	0.00787	2e-05	2.68587	0.01565	19.29	0.11
1500	0.61929	1061.87	2.3963	371.838	1.0755	17.3987	0.0827	0.0001	0.0397	0.2279	0.0216	6.41	0.61	0.00071	0.0002	0.00761	5e-05	2.64496	0.01993	18.99	0.14
2000	0.74651	1065.26	2.2377	376.394	0.9871	17.1855	0.0429	0.0003	0.0268	0.2557	0.0179	7.17	0.5	0.00129	0.00013	0.00737	3e-05	2.59977	0.01673	18.67	0.12
2500	0.82492	647.29	1.3229	232.02	0.4093	10.198	0.0339	0.0003	0.0283	0.1501	0.0228	6.92	1.05	0.00198	0.00022	0.00701	3e-05	2.56898	0.03	18.45	0.21
3000	0.90343	654.005	1.3701	232.286	0.5651	10.1878	0.052	0.0006	0.0316	0.1715	0.0167	7.82	0.76	0.00465	0.00025	0.00699	5e-05	2.56783	0.02298	18.44	0.16
5000	0.97585	609.878	1.0689	214.267	0.4852	9.9252	0.0498	0.002	0.025	0.1072	0.0195	5.22	0.96	0.01702	0.00022	0.00752	5e-05	2.66957	0.02804	19.17	0.2
9000	1	194.181	0.8738	71.4575	0.1621	2.6763	0.0132	0.0021	0.0343	0.039	0.0154	5.91	2.37	0.05509	0.00089	0.00565	4e-05	2.52897	0.06505	18.17	0.46
Integrated		11578.2	8.2474	2958.77	2.4144	141.729	0.1613	0.0075	0.1184	12.4902	0.0795	32.12	0.21	0.00466	7e-05	0.0077	1e-05	2.63625	0.0087	18.93	0.09
34RAP BI#L1
Weighted average of J from standards = 7.134e-03 ± 1.905e-05 (1-sigma error)
Days since irradiation = 53
Laser Power	Cumulative	40Ar	±	39Ar	±	38Ar	±	37Ar	±	36Ar	±	% Atm.	±	Ca/K	±	Cl/K	±	40Ar*/39ArK	±	Age	±
(mW)	39Ar	mV	mV	mV	mV	mV	mV	mV	mV	mV	mV	40Ar								(Ma)	(Ma)
400	0.02437	334.737	0.5193	68.4009	0.1605	4.7063	0.0279	0.0008	0.0521	0.7857	0.0177	69.76	1.57	0.02151	0.0014	0.01181	9e-05	1.47083	0.07674	18.81	0.98
600	0.09015	391.905	1.0209	184.632	0.437	15.0197	0.0502	0.0002	0.0413	0.3064	0.0169	23.43	1.29	0.00172	0.00041	0.01483	7e-05	1.60263	0.02782	20.49	0.35
1000	0.27341	903.393	3.9524	514.406	1.6805	42.1395	0.155	0.0003	0.0546	0.1708	0.0128	5.68	0.43	0.00098	0.00019	0.015	8e-05	1.62842	0.01194	20.81	0.15
1250	0.4268	719.661	3.4846	430.562	2.1332	33.9478	0.2117	0.0002	0.0589	0.0555	0.0127	2.32	0.53	0.00079	0.00025	0.01436	0.00013	1.60369	0.01437	20.5	0.18
1750	0.62897	962.052	3.6988	567.476	1.9545	45.8056	0.1756	0.0003	0.04	0.0891	0.0115	2.78	0.36	0.00096	0.00013	0.01475	9e-05	1.61925	0.01052	20.7	0.13
2000	0.74022	519.642	2.6692	312.279	1.2494	24.6811	0.0902	0.0002	0.0514	0.0225	0.023	1.3	1.33	0.0014	0.0003	0.0144	9e-05	1.6131	0.02425	20.62	0.31
3000	0.83548	441.171	2.3512	267.394	1.3353	20.9896	0.1113	0.0017	0.056	0.0236	0.0115	1.58	0.79	0.01156	0.00039	0.01429	0.00012	1.59467	0.01748	20.38	0.22
6000	0.98752	704.945	3.7374	426.778	1.9008	32.6046	0.1713	0.0081	0.1259	0.0385	0.0124	1.55	0.53	0.03473	0.00056	0.01385	0.00011	1.59699	0.01424	20.41	0.18
9000	1	52.7506	0.3541	35.0257	0.1427	2.1484	0.0209	0.0033	0.0514	0.0164	0.0197	8.85	11.27	0.17148	0.00278	0.01067	0.00014	1.34584	0.16675	17.22	2.12
Integrated		5030.26	8.3368	2806.95	4.2882	222.043	0.3915	0.015	0.1918	1.5085	0.0475	8.99	0.28	0.00981	0.00013	0.0144	4e-05	1.60401	0.00633	20.5	0.1
40RAP BI#L1
Weighted average of J from standards = 7.134e-03 ± 1.905e-05 (1-sigma error)
Days since irradiation = 50
Laser Power	Cumulative	40Ar	±	39Ar	±	38Ar	±	37Ar	±	36Ar	±	% Atm.	±	Ca/K	±	Cl/K	±	40Ar*/39ArK	±	Age	±
(mW)	39Ar	mV	mV	mV	mV	mV	mV	mV	mV	mV	mV	40Ar								(Ma)	(Ma)
400	0.09088	1128.28	8.1228	93.2137	0.5583	6.6432	0.046	0.0016	0.0377	3.5043	0.0464	91.99	1.39	0.03089	0.00077	0.0113	0.00013	0.96696	0.17101	12.39	2.18
600	0.24215	530.04	2.3678	155.165	0.7141	10.0176	0.0768	0.0022	0.0552	0.9452	0.0184	53.12	1.06	0.02644	0.00066	0.01113	0.00012	1.58738	0.039	20.29	0.5
1000	0.50932	732.048	3.9524	274.036	1.0321	17.782	0.1176	0.0039	0.0529	0.8597	0.0266	35.05	1.1	0.02617	0.00037	0.01131	0.0001	1.71583	0.03278	21.92	0.42
1250	0.67941	460.465	1.9315	174.465	0.8197	11.0479	0.0563	0.003	0.062	0.5135	0.0178	33.27	1.16	0.03159	0.00067	0.01099	9e-05	1.74128	0.03314	22.25	0.42
1750	0.78566	292.425	1.2346	108.981	0.4089	6.9928	0.0511	0.0034	0.0475	0.3341	0.0195	34.04	2	0.05671	0.00083	0.01116	0.00011	1.7503	0.05451	22.36	0.69
2000	0.82691	119.008	0.6455	42.3088	0.1431	2.3464	0.0385	0.002	0.0752	0.1255	0.0172	31.36	4.33	0.08499	0.00327	0.00934	0.0002	1.9103	0.12159	24.39	1.54
3000	0.87877	143.546	0.8591	53.1904	0.2674	2.6231	0.0322	0.0027	0.0776	0.1293	0.0119	26.75	2.48	0.09155	0.00272	0.00807	0.00014	1.95501	0.06882	24.96	0.87
6000	0.98161	250.472	1.2257	105.493	0.5322	6.194	0.0418	0.0023	0.0632	0.1403	0.0153	16.69	1.83	0.0399	0.00112	0.01009	0.0001	1.95336	0.04546	24.94	0.58
9000	1	48.4118	0.7684	18.8592	0.1871	0.9523	0.0186	0.0005	0.0586	-0.0068	0.015	-4.27	9.24	0.05204	0.00572	0.00843	0.00023	2.64579	0.23945	33.7	3.02
Integrated		3704.69	9.7831	1025.71	1.7709	64.5994	0.1796	0.0215	0.1802	6.5451	0.0692	52.59	0.57	0.03851	0.00033	0.01078	4e-05	1.69829	0.02231	21.7	0.29
39RAP BI#L1
Weighted average of J from standards = 4.006e-03 ± 1.480e-05 (1-sigma error)
Days since irradiation = 36
Laser Power	Cumulative	40Ar	±	39Ar	±	38Ar	±	37Ar	±	36Ar	±	% Atm.	±	Ca/K	±	Cl/K	±	40Ar*/39ArK	±	Age	±
(mW)	39Ar	mV	mV	mV	mV	mV	mV	mV	mV	mV	mV	40Ar								(Ma)	(Ma)
300	0.00597	1320.23	3.2344	28.9881	0.1327	3.5402	0.0284	0.0025	0.0616	4.2776	0.0392	95.79	0.91	0.16102	0.00397	0.01766	0.00023	1.91619	0.41521	13.78	2.97
600	0.02629	1585.13	4.2173	98.6407	0.3392	3.8073	0.0403	0.014	0.1031	4.4184	0.0329	82.45	0.65	0.2611	0.00212	0.00416	9e-05	2.81587	0.10781	20.21	0.77
900	0.10351	1706.32	3.542	374.849	1.0004	9.7109	0.0854	0.0186	0.0951	1.4306	0.0291	24.85	0.51	0.09094	0.00052	0.0031	5e-05	3.39878	0.02645	24.37	0.19
1200	0.22379	2157.84	4.6474	583.882	1.4568	14.2481	0.0798	0.011	0.0726	0.4098	0.0206	5.61	0.28	0.03453	0.00024	0.0029	3e-05	3.4602	0.01573	24.81	0.11
1500	0.35729	2370.03	6.2678	648.041	2.0934	15.893	0.1055	0.0125	0.0753	0.2765	0.0211	3.43	0.27	0.03553	0.00024	0.00294	4e-05	3.50309	0.01778	25.11	0.13
2000	0.53216	3058.84	2.8228	848.876	1.2321	20.6829	0.0794	0.0204	0.1394	0.2977	0.0276	2.84	0.27	0.04417	0.00031	0.00291	2e-05	3.47211	0.01135	24.89	0.08
2500	0.70383	2994.82	7.8787	833.34	1.9531	20.3471	0.1591	0.0384	0.1732	0.2327	0.0216	2.21	0.21	0.08448	0.00043	0.00292	4e-05	3.48543	0.01469	24.99	0.1
3000	0.82186	2067.15	4.6961	572.933	1.7731	14.3357	0.0592	0.0305	0.1248	0.1466	0.0132	1.99	0.19	0.09761	0.0005	0.00305	3e-05	3.50722	0.01527	25.14	0.11
5000	0.98517	2849.63	10.5062	792.81	2.2651	20.0359	0.1043	0.0538	0.3268	0.2276	0.0423	2.22	0.44	0.12462	0.00084	0.0031	3e-05	3.48559	0.02293	24.99	0.16
9000	1	294.462	0.8063	71.9805	0.2499	1.8646	0.0269	0.0137	0.0796	0.1101	0.0138	10.75	1.4	0.34911	0.00237	0.00319	8e-05	3.62515	0.05921	25.98	0.42
Integrated		20404.5	17.4586	4854.34	4.6161	124.466	0.272	0.2155	0.461	11.8276	0.0878	17.16	0.13	0.08146	0.00019	0.0031	1e-05	3.45743	0.00725	24.79	0.1
43RAP BI#L1
Weighted average of J from standards = 3.415e-03 ± 1.053e-05 (1-sigma error)
Days since irradiation = 30
Laser Power	Cumulative	40Ar	±	39Ar	±	38Ar	±	37Ar	±	36Ar	±	% Atm.	±	Ca/K	±	Cl/K	±	40Ar*/39ArK	±	Age	±
(mW)	39Ar	mV	mV	mV	mV	mV	mV	mV	mV	mV	mV	40Ar								(Ma)	(Ma)
250	0.02294	125.138	0.5685	17.9974	0.1056	1.1947	0.0144	0.0001	0.0241	0.2743	0.0148	65.05	3.51	0.01226	0.00246	0.01115	0.00019	2.41974	0.24494	14.83	1.5
400	0.08136	179.233	2.597	45.8388	0.6576	3.1097	0.0529	0.0001	0.0256	0.0987	0.0127	16.4	2.12	0.00233	0.00103	0.01197	0.00032	3.24404	0.10999	19.86	0.67
550	0.19647	318.336	4.2736	90.308	1.2238	6.2601	0.0727	0	0.0274	0.0341	0.0115	3.2	1.08	0.00076	0.00056	0.01235	0.00026	3.3836	0.07613	20.71	0.46
700	0.31397	317.077	4.1562	92.1894	1.2986	6.4129	0.0855	0.0001	0.029	0.0044	0.0135	0.41	1.27	0.00177	0.00058	0.01241	0.00028	3.39568	0.0789	20.78	0.48
850	0.41441	269.529	3.4097	78.8038	1.0987	5.5274	0.0819	0.0001	0.0249	0.0287	0.0158	3.17	1.75	0.0023	0.00058	0.01252	0.0003	3.28293	0.08672	20.09	0.53
1000	0.50791	247.842	3.0833	73.3637	1.0066	5.1465	0.0835	0.0001	0.0262	0.0154	0.0129	1.84	1.55	0.00194	0.00066	0.01253	0.00031	3.28683	0.08079	20.12	0.49
1250	0.63831	349.314	4.5928	102.308	1.4129	7.1455	0.143	0.0001	0.0342	0.0228	0.0101	1.94	0.86	0.00096	0.00061	0.01247	0.00036	3.31896	0.07075	20.31	0.43
1500	0.73164	252.939	3.0917	73.2215	0.9441	5.1746	0.0866	0	0.0203	0.0025	0.0152	0.29	1.79	0.00114	0.00051	0.01265	0.00031	3.41475	0.08669	20.89	0.53
1750	0.7868	148.217	1.7488	43.2788	0.5553	3.1573	0.0498	0.0001	0.0224	-0.0051	0.0148	-1.02	2.98	0.00248	0.00095	0.01313	0.00031	3.42963	0.11772	20.99	0.72
2000	0.86661	213.786	2.549	62.6179	0.86	4.6687	0.0673	0.0001	0.0278	0.0022	0.0128	0.3	1.78	0.00272	0.00082	0.01346	0.00031	3.3744	0.08643	20.65	0.53
2500	0.92142	146.797	1.5673	43	0.522	3.312	0.047	0.0002	0.0259	0.0096	0.0155	1.94	3.14	0.00924	0.00111	0.01397	0.0003	3.31851	0.11947	20.31	0.73
3000	0.93938	47.1993	0.3699	14.0918	0.1464	1.1219	0.0189	0.0001	0.0202	-0.0138	0.0147	-8.73	9.26	0.01096	0.00263	0.01457	0.00033	3.60951	0.3107	22.08	1.89
5000	0.99245	140.231	1.4776	41.6415	0.506	3.3585	0.0459	0.0003	0.0228	0.001	0.0134	0.19	2.85	0.0135	0.00102	0.01474	0.00031	3.33168	0.10932	20.39	0.67
9000	1	21.3324	0.286	5.9233	0.0903	0.4872	0.0251	0.0001	0.0259	-0.0111	0.0158	-15.53	22.09	0.02237	0.00803	0.01516	0.00093	4.1263	0.79291	25.22	4.81
Integrated		2776.97	10.4309	784.584	3.2158	56.077	0.2637	0.0014	0.0963	0.4637	0.052	4.97	0.56	0.0033	0.00023	0.01279	9e-05	3.33522	0.0274	20.41	0.18
59COL BI#L1
Weighted average of J from standards = 3.560e-03 ± 8.734e-06 (1-sigma error)
Days since irradiation = 72
Laser Power	Cumulative	40Ar	±	39Ar	±	38Ar	±	37Ar	±	36Ar	±	% Atm.	±	Ca/K	±	Cl/K	±	40Ar*/39ArK	±	Age	±
(mW)	39Ar	mV	mV	mV	mV	mV	mV	mV	mV	mV	mV	40Ar								(Ma)	(Ma)
400	0.00617	153.593	0.3522	6.7712	0.0564	0.9431	0.0184	0.0009	0.0452	0.3641	0.0208	70.1	4.01	0.25036	0.01242	0.02495	0.00062	6.77437	0.91049	42.94	5.7
600	0.0181	246.329	0.5895	13.1016	0.056	1.6488	0.016	0.0011	0.0541	0.2789	0.0156	33.47	1.88	0.14937	0.0076	0.0234	0.00028	12.4894	0.35964	78.39	2.21
800	0.04368	595.126	1.7524	28.0854	0.0835	3.6433	0.0227	0.0017	0.0667	0.3276	0.0207	16.26	1.03	0.11306	0.00437	0.02459	0.00019	17.7196	0.23301	110.23	1.41
1000	0.07922	800.725	2.0188	39.0342	0.1752	4.9484	0.034	0.002	0.0649	0.2671	0.0177	9.85	0.66	0.09381	0.00308	0.02416	0.00022	18.4665	0.16597	114.73	1
1250	0.12785	1045.9	2.6111	53.3905	0.1951	6.7794	0.0445	0.0024	0.0571	0.1325	0.017	3.73	0.48	0.08097	0.00199	0.02438	0.0002	18.8307	0.12642	116.92	0.76
1500	0.18796	1302.11	5.7937	66.004	0.3257	8.497	0.0567	0.0027	0.0595	0.0969	0.0175	2.18	0.4	0.07618	0.0017	0.02479	0.00022	19.2685	0.15129	119.55	0.91
1750	0.24803	1304.13	5.0701	65.9629	0.2412	8.5783	0.0543	0.003	0.0764	0.074	0.0138	1.66	0.31	0.08219	0.00215	0.02507	0.0002	19.4139	0.12168	120.42	0.73
2000	0.3072	1287.63	5.0745	64.9632	0.2786	8.3534	0.0426	0.0027	0.0853	0.0636	0.0149	1.44	0.34	0.07731	0.00243	0.02477	0.00018	19.506	0.133	120.98	0.8
2500	0.38311	1657	5.4768	83.3472	0.3556	10.769	0.0577	0.0035	0.069	0.0899	0.015	1.59	0.27	0.07621	0.00155	0.0249	0.00019	19.5361	0.11883	121.16	0.71
3000	0.45969	1675.45	5.5601	84.092	0.3228	10.9423	0.0743	0.0036	0.0886	0.0661	0.0144	1.15	0.25	0.07926	0.00196	0.0251	0.00021	19.6662	0.11242	121.94	0.67
3500	0.53265	1593.08	5.8422	80.108	0.3628	10.4373	0.0502	0.0037	0.0874	0.0431	0.0183	0.78	0.34	0.08528	0.00204	0.02515	0.00018	19.7023	0.13362	122.15	0.8
4500	0.67324	3057.91	9.1622	154.379	0.2885	20.8309	0.0479	0.009	0.1905	0.0717	0.0191	0.67	0.18	0.10692	0.00227	0.02613	8e-05	19.6466	0.07881	121.82	0.47
6000	0.92007	5264.77	6.5118	271.05	0.8264	37.8943	0.138	0.0419	0.2345	0.1284	0.0135	0.66	0.08	0.28364	0.00181	0.02715	0.00014	19.2688	0.06524	119.55	0.39
8000	1	1718.04	6.1069	87.7911	0.3609	14.7531	0.0728	0.0473	0.2045	0.0523	0.0131	0.67	0.23	0.98799	0.0059	0.03309	0.00023	19.4156	0.11483	120.43	0.69
Integrated		21701.8	18.9247	1098.08	1.2581	149.019	0.2241	0.1255	0.4323	2.0562	0.0625	2.76	0.09	0.20967	0.00076	0.02624	5e-05	19.1913	0.03264	119.09	0.34
01HAJ BI#L1
Weighted average of J from standards = 3.916e-03 ± 3.742e-05 (1-sigma error)
Days since irradiation = 75
Laser Power	Cumulative	40Ar	±	39Ar	±	38Ar	±	37Ar	±	36Ar	±	% Atm.	±	Ca/K	±	Cl/K	±	40Ar*/39ArK	±	Age	±
(mW)	39Ar	mV	mV	mV	mV	mV	mV	mV	mV	mV	mV	40Ar								(Ma)	(Ma)
500	0.00997	269.642	2.7131	16.6081	0.1341	5.3204	0.0485	-0.0007	0.2023	0.5258	0.0286	57.74	3.19	-0.07242	0.02236	0.06384	0.00082	6.84795	0.53718	47.69	3.69
1000	0.07455	1319.12	12.6459	107.641	1.1741	37.7895	0.3459	-0.0004	0.1535	0.9806	0.0228	22.02	0.55	-0.00612	0.00262	0.07117	0.00105	9.53286	0.16909	66.05	1.15
1500	0.23547	2891.81	8.669	268.196	2.5272	95.7839	0.9287	0.0004	0.1577	0.5577	0.0388	5.71	0.4	0.00275	0.00108	0.07273	0.00101	10.1384	0.10977	70.16	0.75
2000	0.49169	4507.75	12.9525	427.026	4.2753	153.553	1.7595	0.004	0.1614	0.3868	0.0245	2.54	0.16	0.01712	0.00071	0.07329	0.00115	10.2596	0.10872	70.99	0.74
2500	0.70434	3729.09	10.8769	354.422	3.2802	128.443	1.1567	0.0182	0.2221	0.3046	0.032	2.38	0.25	0.09447	0.00144	0.07388	0.00098	10.2425	0.10341	70.87	0.7
3000	0.82446	2077.01	21.3441	200.205	2.065	71.7033	0.7452	0.0154	0.2038	0.1197	0.0273	1.65	0.39	0.14088	0.00237	0.073	0.0011	10.175	0.15515	70.41	1.05
3500	0.89825	1253.62	12.1238	122.988	1.1487	43.4556	0.4332	0.0041	0.1983	-0.0005	0.0287	-0.04	0.68	0.06119	0.00301	0.07201	0.00101	10.1676	0.15344	70.36	1.04
4000	0.94119	705.869	6.1998	71.5646	0.6536	25.2069	0.2256	-0.004	0.1366	-0.0812	0.0263	-3.36	1.11	-0.10255	0.00362	0.07182	0.00095	10.164	0.16726	70.34	1.14
4500	0.96174	302.459	3.1367	34.2432	0.2697	11.7151	0.1012	-0.0071	0.135	-0.165	0.0247	-15.98	2.42	-0.37949	0.00782	0.06983	0.00084	10.2086	0.2453	70.64	1.66
5000	0.97851	234.317	2.5616	27.9376	0.2354	9.4522	0.0926	-0.0078	0.1302	-0.1523	0.0279	-18.99	3.53	-0.51381	0.00958	0.06905	0.00092	9.94295	0.31992	68.84	2.17
6000	0.99679	262.991	2.8945	30.461	0.2586	10.3115	0.1025	-0.0069	0.1485	-0.142	0.0215	-15.79	2.43	-0.41445	0.00961	0.06906	0.00093	9.96109	0.24467	68.96	1.66
9000	1	-10.9511	2.549	5.349	0.0604	1.3332	0.0404	-0.0079	0.1323	-0.2549	0.0201	672.17	163.22	-2.71777	0.05467	0.05195	0.0017	11.8718	1.21467	81.89	8.19
Integrated		17542.7	34.6522	1666.64	6.5597	594.068	2.4986	0.0074	0.5822	2.0792	0.0948	3.51	0.16	0.00811	0.00064	0.07261	0.00043	10.1279	0.04809	70.09	0.73

## Sheet: This study--FS Ar
This study--FS Ar
10CH08 FS#L1
Weighted average of J from standards = 3.238e-03 ± 1.595e-05 (1-sigma error)
Days since irradiation = 239
Laser Power	Cumulative	40Ar	±	39Ar	±	38Ar	±	37Ar	±	36Ar	±	% Atm.	±	Ca/K	±	Cl/K	±	40Ar*/39ArK	±	Age	±
(mW)	39Ar	mV	mV	mV	mV	mV	mV	mV	mV	mV	mV	40Ar								(Ma)	(Ma)
300	0.0002	43.3294	0.4374	0.0643	0.0393	0.0604	0.023	0.0007	2.2286	0.1196	0.0244	81.46	16.64	20.1607	65.7834	0.12324	0.1089	125.957	137.31	616.49	569.16
600	0.00452	180.254	0.5074	1.3768	0.0458	0.4392	0.0271	-0.0018	2.3128	0.4978	0.0264	81.7	4.34	-2.39951	3.07746	0.05053	0.00454	23.9275	5.73458	134.49	31.06
900	0.05829	348.762	0.6321	17.1426	0.0866	0.9192	0.025	-0.0006	2.3936	0.7107	0.0265	60.32	2.25	-0.0655	0.25619	0.00744	0.00032	8.0604	0.45975	46.44	2.61
1200	0.14383	195.723	0.529	27.2726	0.0983	0.7218	0.0237	0.002	2.4399	0.2492	0.0219	37.69	3.32	0.13787	0.16417	0.00301	0.00019	4.45337	0.2386	25.8	1.37
1500	0.23619	87.9402	0.3984	29.4453	0.0591	0.4449	0.0264	-0.0023	2.7782	0.1044	0.0247	35.64	8.39	-0.14176	0.1731	0.00084	0.00019	1.90293	0.2484	11.07	1.44
1750	0.2991	42.996	0.4114	20.0566	0.0752	0.2666	0.0219	-0.0009	2.2985	0.0363	0.0208	25.45	14.51	-0.08612	0.21026	0.00053	0.00023	1.57601	0.30766	9.17	1.79
2000	0.36224	42.3862	0.3875	20.1319	0.0697	0.2636	0.0242	-0.0014	2.4369	0.0376	0.0226	26.83	15.97	-0.12377	0.22209	0.00048	0.00026	1.51876	0.33224	8.84	1.93
2500	0.45573	108.237	0.4045	29.8069	0.0904	0.5682	0.0239	0.0003	2.1147	0.1032	0.0255	28.39	7.03	0.02104	0.13018	0.00167	0.00017	2.57913	0.25371	14.99	1.47
3000	0.53022	46.3911	0.39	23.7482	0.1121	0.3223	0.0224	-0.002	2.1074	0.0398	0.0239	26.08	15.44	-0.15509	0.16281	0.00059	0.0002	1.42203	0.29757	8.28	1.73
3500	0.59497	40.3466	0.3923	20.6421	0.0711	0.2632	0.0221	-0.0021	2.5942	0.0135	0.0212	10.51	15.76	-0.19028	0.23057	0.00046	0.00023	1.72253	0.30416	10.02	1.77
4000	0.65407	44.4534	0.4064	18.8406	0.1096	0.3254	0.0225	0.0003	2.4376	0.056	0.0234	37.62	15.79	0.02729	0.2374	0.00132	0.00026	1.45341	0.36861	8.46	2.14
5000	0.73834	87.2933	0.4268	26.8675	0.1067	0.5493	0.0239	-0.0014	2.46	0.0911	0.0265	31.25	9.07	-0.09884	0.16799	0.00197	0.00019	2.21306	0.2925	12.87	1.69
9000	0.97291	249.042	0.6548	74.7889	0.367	1.7087	0.0294	0.0019	2.2932	0.1951	0.0255	23.29	3.06	0.04776	0.05626	0.0025	9e-05	2.53153	0.10205	14.71	0.59
Fusion	1	23.0815	0.4152	8.635	0.0766	0.1806	0.0211	-0.003	3.015	0.006	0.0203	8.87	26.31	-0.62855	0.64037	0.00217	0.00052	2.40837	0.69786	14	4.04
Integrated		1540.24	1.7391	318.819	0.4739	7.0333	0.0903	-0.0102	9.1062	2.2602	0.0895	43.69	1.73	-0.05884	0.05241	0.00216	6e-05	2.70379	0.08329	15.71	0.49
15CSR02 FS#L1
Weighted average of J from standards = 4.969e-03 ± 1.797e-05 (1-sigma error)
Days since irradiation = 50
Laser Power	Cumulative	40Ar	±	39Ar	±	38Ar	±	37Ar	±	36Ar	±	% Atm.	±	Ca/K	±	Cl/K	±	40Ar*/39ArK	±	Age	±
(mW)	39Ar	mV	mV	mV	mV	mV	mV	mV	mV	mV	mV	40Ar								(Ma)	(Ma)
300	0.00468	1319.73	1.4631	7.887	0.0423	1.7332	0.0275	-0.0001	0.039	2.4135	0.0282	54.05	0.63	-0.01374	0.00906	0.03194	0.00077	76.8718	1.14909	582.98	7.45
600	0.05565	368.322	0.3286	85.8312	0.2924	1.6072	0.0215	0.0002	0.0376	0.5048	0.0195	40.78	1.58	0.00349	0.0008	0.00151	5e-05	2.52366	0.06795	22.46	0.6
1000	0.1121	120.252	0.2156	95.0454	0.1587	1.1715	0.02	0.0001	0.0553	0.1168	0.0132	29.39	3.33	0.00286	0.00107	0.00035	4e-05	0.87243	0.04125	7.8	0.37
1500	0.16292	150.004	0.2171	85.5749	0.1523	1.1037	0.0249	0	0.0463	0.0998	0.0191	19.99	3.83	0.00084	0.00099	0.00047	6e-05	1.37875	0.06603	12.3	0.59
2000	0.20479	83.6207	0.1845	70.5173	0.1787	0.8818	0.0115	0.0001	0.0493	0.0554	0.0128	20.06	4.65	0.00226	0.00128	0.0004	4e-05	0.92416	0.0539	8.26	0.48
2500	0.24922	103.271	0.1664	74.8162	0.2007	0.9517	0.019	0.0001	0.0425	0.0836	0.0144	24.43	4.2	0.00263	0.00104	0.00044	5e-05	1.02068	0.05686	9.12	0.51
3000	0.29807	148.686	0.3242	82.2522	0.1955	1.1617	0.0202	0.0002	0.0395	0.1363	0.0159	27.53	3.21	0.00409	0.00088	0.00071	5e-05	1.28859	0.05736	11.5	0.51
4000	0.40051	355.381	0.5225	172.513	0.1411	2.5765	0.0171	0.0005	0.0483	0.3644	0.0232	30.73	1.96	0.00489	0.00051	0.00086	2e-05	1.40633	0.0399	12.55	0.35
5000	0.5552	576.309	0.9043	260.491	0.4697	3.9623	0.0318	0.0003	0.043	0.5942	0.0277	30.88	1.44	0.00228	0.0003	0.00091	3e-05	1.50878	0.03172	13.46	0.28
9000	0.92916	1552.58	0.7265	629.718	0.978	9.1124	0.0669	0.0002	0.0461	1.0187	0.023	19.63	0.44	0.00049	0.00013	0.00078	2e-05	1.95778	0.01126	17.45	0.1
Fusion	1	291.937	0.4274	119.29	0.2985	1.6866	0.0361	0	0.0453	0.1432	0.0231	14.68	2.37	-0.00019	0.0007	0.00073	6e-05	2.06278	0.05768	18.38	0.51
Integrated		5070.09	2.0761	1683.94	1.2378	25.9487	0.1011	0.0016	0.1493	5.5307	0.0686	32.55	0.4	0.00175	0.00016	0.00091	1e-05	2.01069	0.0122	17.91	0.13
55SUS FS#L1
Weighted average of J from standards = 3.929e-03 ± 8.184e-06 (1-sigma error)
Days since irradiation = 55
Laser Power	Cumulative	40Ar	±	39Ar	±	38Ar	±	37Ar	±	36Ar	±	% Atm.	±	Ca/K	±	Cl/K	±	40Ar*/39ArK	±	Age	±
(mW)	39Ar	mV	mV	mV	mV	mV	mV	mV	mV	mV	mV	40Ar								(Ma)	(Ma)
400	0.00185	131.89	0.4798	0.9724	0.022	0.1953	0.0082	0.0001	0.0614	0.121	0.0241	27.12	5.4	0.16219	0.11591	0.0351	0.00219	98.8346	7.6685	591.21	39.11
600	0.01105	46.2838	0.2379	4.8369	0.0292	0.1018	0.0152	0	0.0521	0.0447	0.0236	28.62	15.14	0.01863	0.01975	0.00187	0.00069	6.80879	1.44535	47.57	9.97
800	0.03324	39.2987	0.311	11.6673	0.071	0.146	0.0121	0.0001	0.0649	0.0237	0.0276	17.99	20.92	0.01009	0.0102	0.00036	0.00024	2.73805	0.69921	19.28	4.9
1000	0.06718	32.7936	0.2252	17.8461	0.0452	0.2243	0.011	0.0001	0.0593	0.0373	0.0311	34.14	28.5	0.01424	0.0061	0.00037	0.00015	1.19059	0.51537	8.41	3.63
1300	0.11821	43.7064	0.2834	26.8258	0.1099	0.3602	0.0125	0.0001	0.0614	0.018	0.0309	12.36	21.29	0.00516	0.0042	0.0006	0.00011	1.40184	0.34078	9.9	2.4
1600	0.16939	44.7521	0.3364	26.9098	0.0839	0.3532	0.0129	0.0001	0.0529	0.0063	0.0254	4.23	17.1	0.0053	0.00361	0.00055	0.00011	1.56427	0.27955	11.04	1.97
1800	0.2012	19.8815	0.2669	16.7255	0.0631	0.2067	0.0155	0.0001	0.058	-0.0221	0.0298	-33.79	45.49	0.00886	0.00636	0.00046	0.00021	1.55059	0.52749	10.94	3.71
2000	0.23145	18.9631	0.2753	15.9032	0.0749	0.2039	0.0114	0.0001	0.0504	0.0181	0.0245	28.94	39.13	0.01163	0.00582	0.00046	0.00016	0.82617	0.45533	5.84	3.21
2250	0.25591	15.1487	0.3235	12.8603	0.0688	0.1566	0.0121	0	0.0588	-0.0412	0.0275	-82.37	55.15	0.00023	0.00838	0.00049	0.00022	2.09403	0.63353	14.76	4.45
2500	0.27779	12.6235	0.2727	11.502	0.0739	0.1489	0.007	0.0001	0.0482	-0.0157	0.0261	-37.8	62.73	0.01449	0.0077	0.00058	0.00016	1.47139	0.67023	10.39	4.72
3000	0.30799	23.2041	0.2835	15.8796	0.0683	0.2025	0.0085	0.0002	0.0481	-0.0198	0.0252	-25.75	32.79	0.02376	0.00556	0.00053	0.00013	1.80021	0.46978	12.7	3.3
3250	0.32776	14.4115	0.2625	10.3927	0.0758	0.1319	0.0088	0.0001	0.0615	-0.0114	0.0262	-23.88	54.96	0.02324	0.01086	0.00052	0.0002	1.68102	0.74629	11.86	5.25
3500	0.34707	14.9459	0.2556	10.1516	0.0624	0.1365	0.0085	0.0001	0.0563	-0.012	0.0235	-24.25	47.39	0.01208	0.01017	0.00068	0.0002	1.79248	0.68423	12.65	4.81
4000	0.37312	25.0221	0.221	13.6964	0.0777	0.1858	0.0164	0.0001	0.0653	-0.0175	0.0289	-21	34.67	0.01563	0.00874	0.00071	0.00027	2.17463	0.62346	15.33	4.38
4500	0.40155	36.8202	0.2444	14.9494	0.0633	0.1949	0.0109	0	0.0543	-0.0047	0.0252	-3.8	20.48	0.00474	0.00666	0.00056	0.00017	2.52575	0.49867	17.79	3.5
5000	0.42906	45.3667	0.2319	14.4654	0.0808	0.2045	0.0136	0.0001	0.0518	-0.0197	0.0242	-12.98	15.9	0.00674	0.00657	0.00083	0.00021	3.50966	0.49455	24.68	3.45
6000	0.48281	131.546	0.3766	28.2554	0.0717	0.4384	0.0148	0.0002	0.0502	0.0046	0.027	1.03	6.09	0.01348	0.00326	0.00106	0.00012	4.57817	0.28246	32.12	1.96
9000	0.55257	162.44	0.473	36.6802	0.1681	0.5696	0.0185	0.0002	0.0634	0.0255	0.0259	4.67	4.75	0.00863	0.00317	0.00104	0.00011	4.19355	0.21009	29.45	1.46
Fusion	1	1337.15	6.3652	235.24	0.9936	3.6679	0.0399	0.0004	0.0652	0.2065	0.0193	4.59	0.43	0.00306	0.00051	0.00105	4e-05	5.3952	0.04298	37.8	0.3
Integrated		2196.25	6.4971	525.76	1.0483	7.8291	0.0663	0.0022	0.2498	0.342	0.1145	4.63	1.55	0.0075	0.00087	0.00091	3e-05	3.95573	0.06599	27.79	0.46
60SUS FS#L1
Weighted average of J from standards = 3.908e-03 ± 1.404e-05 (1-sigma error)
Days since irradiation = 55
Laser Power	Cumulative	40Ar	±	39Ar	±	38Ar	±	37Ar	±	36Ar	±	% Atm.	±	Ca/K	±	Cl/K	±	40Ar*/39ArK	±	Age	±
(mW)	39Ar	mV	mV	mV	mV	mV	mV	mV	mV	mV	mV	40Ar								(Ma)	(Ma)
400	0.00043	258.336	0.7182	0.5245	0.0233	0.0667	0.012	0.0001	0.0384	0.1806	0.0186	20.65	2.13	0.2281	0.13491	0.01098	0.00505	390.847	20.3368	1670.92	56.67
600	0.00061	28.2598	0.3724	0.2147	0.0178	0.0317	0.009	0.0001	0.0312	0.0589	0.0142	61.55	14.9	0.91208	0.27746	0.01807	0.00929	50.6187	20.1089	325.29	118.23
800	0.00515	192.013	0.4509	5.4867	0.0373	0.137	0.0139	0.0001	0.056	0.1944	0.0183	29.95	2.82	0.02837	0.01873	0.00166	0.00055	24.4955	1.0048	164.75	6.46
1000	0.09184	181.68	0.7306	104.862	0.3634	1.302	0.0215	0.002	0.0628	0.1447	0.0177	23.86	2.94	0.03488	0.00111	0.00036	4e-05	1.29659	0.05066	9.11	0.35
1300	0.1803	131.856	0.5773	107.003	0.4175	1.3633	0.0219	0.004	0.0674	0.064	0.0179	14.44	4.12	0.06775	0.00119	0.00046	4e-05	1.02892	0.05002	7.23	0.35
1600	0.23945	113.796	0.3519	71.5464	0.1724	0.9424	0.0155	0.0012	0.0406	0.1425	0.0293	37.62	7.76	0.02955	0.00104	0.0005	5e-05	0.97371	0.12116	6.84	0.85
1800	0.27224	48.024	0.3941	39.6617	0.0972	0.5071	0.0123	0.0002	0.0443	0.0301	0.0169	18.95	10.64	0.01043	0.00205	0.00046	7e-05	0.95736	0.12605	6.73	0.88
2000	0.29711	36.3634	0.3164	30.0809	0.0748	0.4066	0.0175	0.0001	0.0408	-0.0017	0.0167	-1.46	13.88	0.00893	0.00249	0.00065	0.00012	1.19635	0.16406	8.41	1.15
2250	0.3208	82.657	0.3364	28.6498	0.1192	0.3871	0.0136	0.0001	0.0518	0.156	0.0196	56.34	7.1	0.00846	0.00332	0.00043	0.0001	1.24675	0.20307	8.76	1.42
2500	0.34187	32.4804	0.3599	25.4907	0.0849	0.3331	0.017	0.0001	0.0485	0.0145	0.0217	13.44	20.17	0.00878	0.00349	0.00053	0.00014	1.07728	0.25146	7.57	1.76
3000	0.37381	76.3099	0.3229	38.6307	0.0974	0.503	0.0147	0.0003	0.0461	0.0517	0.0173	20.31	6.8	0.01384	0.00219	0.00049	8e-05	1.55049	0.13264	10.89	0.93
3250	0.39658	34.9531	0.3661	27.5441	0.1373	0.3477	0.0123	0.0002	0.0396	0.0014	0.0166	1.19	14.41	0.0118	0.00264	0.00046	0.0001	1.22459	0.17916	8.6	1.26
3500	0.41811	35.3819	0.4569	26.0357	0.0753	0.3294	0.0152	0.0001	0.0361	0.0103	0.0157	8.78	13.39	0.00916	0.00255	0.00045	0.00013	1.2125	0.17883	8.52	1.25
4000	0.44776	53.6104	0.3574	35.8637	0.189	0.4228	0.0168	0.0002	0.0456	0.0264	0.0149	14.79	8.38	0.01011	0.00233	0.00025	0.0001	1.24847	0.12332	8.77	0.86
4500	0.48011	61.0743	0.3521	39.1264	0.1017	0.4965	0.0139	0.0001	0.0447	0.0274	0.0157	13.48	7.76	0.00662	0.00209	0.00045	8e-05	1.3248	0.11919	9.31	0.84
5000	0.51134	60.8091	0.3161	37.7781	0.1438	0.4969	0.0143	0.0001	0.0468	0.0435	0.0166	21.53	8.2	0.00453	0.00227	0.00052	8e-05	1.23977	0.12989	8.71	0.91
6000	0.5517	87.4241	0.3967	48.8223	0.1573	0.5959	0.017	0.0001	0.0453	0.0445	0.0144	15.28	4.94	0.00451	0.0017	0.00033	7e-05	1.49184	0.08742	10.48	0.61
9000	0.59068	81.9485	0.338	47.141	0.0914	0.6172	0.0161	0.0002	0.0524	0.0408	0.018	14.94	6.59	0.00736	0.00204	0.00052	7e-05	1.45342	0.11291	10.21	0.79
Fusion	1	1337.35	5.2099	495.096	2.168	6.2817	0.0785	0.0007	0.0531	0.8105	0.0165	18.1	0.37	0.00253	0.0002	0.00041	4e-05	2.18785	0.01737	15.34	0.12
Integrated		2934.33	5.5281	1209.56	2.2823	15.5681	0.1025	0.01	0.208	2.0405	0.0785	20.77	0.8	0.01517	0.00032	0.00044	2e-05	1.89845	0.02005	13.32	0.15
67SUS FS#L1
Weighted average of J from standards = 3.908e-03 ± 1.404e-05 (1-sigma error)
Days since irradiation = 55
Laser Power	Cumulative	40Ar	±	39Ar	±	38Ar	±	37Ar	±	36Ar	±	% Atm.	±	Ca/K	±	Cl/K	±	40Ar*/39ArK	±	Age	±
(mW)	39Ar	mV	mV	mV	mV	mV	mV	mV	mV	mV	mV	40Ar								(Ma)	(Ma)
400	0.11497	1553.62	12.5498	54.3693	0.4294	1.9487	0.029	0.0135	0.1168	4.5391	0.052	86.35	1.21	0.4558	0.00534	0.00206	0.00012	3.89684	0.36645	27.24	2.54
600	0.18387	365.017	2.1114	32.5861	0.1829	0.5911	0.0231	0.0104	0.1046	0.736	0.0284	59.51	2.33	0.58397	0.00674	0.00073	0.00015	4.52497	0.26705	31.59	1.85
800	0.24861	355.718	1.9	30.6203	0.2405	0.6023	0.0188	0.0117	0.1002	0.6875	0.0253	56.98	2.13	0.70353	0.00816	0.00106	0.00014	4.98572	0.25479	34.78	1.76
1000	0.31118	282.742	0.9783	29.5931	0.148	0.5307	0.0156	0.0136	0.1596	0.4816	0.02	50.09	2.11	0.84141	0.01076	0.00094	0.00012	4.7554	0.20421	33.18	1.41
1300	0.37899	288.854	1.1702	32.0762	0.1391	0.5691	0.0177	0.0184	0.1615	0.4854	0.021	49.3	2.17	1.05211	0.01031	0.00095	0.00012	4.55253	0.19817	31.78	1.37
1600	0.44403	257.788	1.3457	30.7581	0.1616	0.5135	0.0194	0.0127	0.1264	0.4187	0.0234	47.76	2.7	0.76068	0.00854	0.00078	0.00014	4.36425	0.22996	30.48	1.59
1800	0.50478	267.456	0.9175	28.7352	0.1107	0.5625	0.0161	0.0132	0.1104	0.4664	0.0254	51.29	2.82	0.84513	0.00777	0.00129	0.00012	4.52093	0.26406	31.56	1.83
2000	0.60641	426.464	1.4373	48.0654	0.173	0.9492	0.0204	0.017	0.1595	0.7336	0.0231	50.67	1.62	0.65036	0.00652	0.00136	9e-05	4.36315	0.14624	30.47	1.01
2250	0.76969	911.356	3.7794	77.2206	0.314	1.866	0.0258	0.0284	0.0862	1.861	0.0272	60.24	0.92	0.67397	0.00342	0.00194	7e-05	4.68244	0.11658	32.68	0.81
2500	0.83847	432.48	1.7542	32.5321	0.1338	0.885	0.0239	0.0129	0.0716	0.9354	0.0245	63.81	1.7	0.7262	0.00502	0.0024	0.00016	4.8014	0.23012	33.5	1.59
3000	0.88453	319.576	1.0917	21.792	0.0604	0.6257	0.0217	0.0177	0.0997	0.7203	0.0268	66.28	2.49	1.4949	0.00937	0.00255	0.00021	4.93774	0.36723	34.44	2.54
3250	0.90234	155.314	0.474	8.4261	0.0483	0.308	0.0155	0.0069	0.0755	0.3432	0.0225	65.03	4.3	1.51094	0.0186	0.0039	0.0004	6.43829	0.79303	44.78	5.45
3500	0.92354	136.685	0.5083	10.0237	0.0384	0.2815	0.0165	0.0056	0.0569	0.2587	0.0213	55.71	4.61	1.03187	0.01115	0.0027	0.00036	6.02867	0.62956	41.97	4.33
4000	0.94566	158.628	0.5636	10.4654	0.0634	0.3273	0.0207	0.0068	0.0724	0.3485	0.0214	64.7	4	1.19098	0.01461	0.00308	0.00042	5.343	0.60819	37.24	4.2
4500	0.97383	219.635	0.7794	13.3243	0.1031	0.566	0.0214	0.007	0.0927	0.4995	0.0236	67.06	3.19	0.95815	0.01478	0.00527	0.00035	5.4218	0.52873	37.79	3.65
5000	0.98249	47.2285	0.3617	4.0963	0.0384	0.1193	0.0174	0.0024	0.0559	0.0555	0.0195	34.42	12.25	1.09087	0.02705	0.0034	0.00091	7.5452	1.41383	52.37	9.67
6000	0.98829	35.1312	0.3108	2.7444	0.0259	0.08	0.0173	0.0049	0.0616	0.0668	0.0214	55.18	18.03	3.25282	0.05146	0.003	0.00136	5.73167	2.30859	39.92	15.9
9000	0.99281	78.0692	0.2712	2.1388	0.0289	0.0905	0.0155	0.0016	0.0609	0.1851	0.0229	69.95	8.67	1.34112	0.05532	0.0033	0.00158	10.9656	3.16823	75.62	21.4
Fusion	1	37.1063	0.3767	3.4047	0.0411	0.081	0.0126	0.0054	0.0729	0.06	0.0167	46.71	13.31	2.90065	0.05271	0.00214	0.0008	5.79902	1.45323	40.38	10.01
Integrated		6328.87	13.893	472.972	0.727	11.4973	0.0863	0.2101	0.4483	13.8823	0.1113	64.69	0.54	0.81529	0.00214	0.00177	4e-05	4.7162	0.07589	32.91	0.54
10ANK02 FS#F1
Weighted	average	of	J	from	standards	=	0.003403	±	1.328e-05	(1-sigma	error)
Days since irradiation = 187
Temperature	Cumulative	40Ar	±	39Ar	±	38Ar	±	37Ar	±	36Ar	±	% Atm.	±	Ca/K	±	Cl/K	±	40Ar*/39ArK	±	Age	±
(°C)	39Ar	mV	mV	mV	mV	mV	mV	mV	mV	mV	mV	40Ar								(Ma)	(Ma)
300	0.00081	2049.16	4.6278	2.8814	0.0344	1.3923	0.0249	0.0002	0.5142	6.8599	0.041	98.93	0.63	0.15327	0.32749	0.00581	0.0019	7.63386	4.50109	46.21	26.9
300	0.00142	526.586	1.4481	2.1932	0.0362	0.3841	0.0149	0	0.5681	1.652	0.0253	92.72	1.44	-0.03557	0.47522	0.00501	0.0015	17.4856	3.48458	104.15	20.17
350	0.00241	675.51	1.579	3.5199	0.0403	0.6949	0.0108	0.0004	0.6809	1.3591	0.0296	59.46	1.3	0.21162	0.35501	0.02411	0.00079	77.7987	2.68075	423.21	13
350	0.00384	374.796	1.0761	5.1256	0.0235	0.3089	0.0201	0.0022	0.6491	1.1416	0.0267	89.99	2.12	0.77244	0.23252	0.00172	0.00085	7.31677	1.55236	44.31	9.29
400	0.00661	981.858	2.008	9.8668	0.0758	1.1012	0.0207	0.0031	0.8865	1.8942	0.0282	57	0.86	0.57098	0.16499	0.01372	0.00047	42.7867	0.92961	244.93	4.98
400	0.01133	420.473	0.7614	16.8465	0.0864	0.448	0.0228	0.0034	0.7124	1.1208	0.0252	78.79	1.78	0.37004	0.07764	0.00078	0.00029	5.28793	0.44513	32.14	2.68
450	0.01725	324.828	0.721	21.1351	0.0608	0.4655	0.0168	0.0048	0.6384	0.6497	0.0188	59.1	1.72	0.42028	0.05545	0.00123	0.00017	6.27501	0.26637	38.07	1.6
450	0.02714	600.235	1.3405	35.329	0.1141	0.7376	0.0202	0.0074	0.6479	1.4212	0.0219	69.99	1.09	0.38468	0.03368	0.00062	0.00012	5.09105	0.18802	30.95	1.13
500	0.03617	512.414	1.1086	32.2107	0.1736	0.6931	0.0471	0.0074	2.7762	0.8704	0.0261	50.17	1.51	0.42104	0.15821	0.00127	0.00031	7.91382	0.24572	47.88	1.47
500	0.05005	701.148	1.7499	49.5752	0.169	0.8839	0.0272	0.0147	1.3051	1.2589	0.0645	52.99	2.73	0.54525	0.04836	0.00056	0.00013	6.63554	0.38701	40.23	2.32
550	0.05999	688.743	1.2088	35.4586	0.0792	0.7731	0.0169	0.0143	0.6509	1.2905	0.0205	55.28	0.88	0.74184	0.03374	0.00096	0.0001	8.67523	0.1751	52.42	1.04
550	0.07167	818.565	1.9191	41.7012	0.145	0.8297	0.0242	0.0142	0.6526	1.569	0.0221	56.58	0.81	0.62648	0.02881	0.00051	0.00012	8.51174	0.16568	51.45	0.99
600	0.07937	3105.29	1.8701	27.483	0.1135	2.208	0.0234	0.0145	0.737	9.7041	0.0608	92.33	0.58	0.97076	0.04941	0.00082	0.0002	8.66683	0.65888	52.37	3.92
600	0.09418	922.372	1.2731	52.874	0.137	0.9417	0.0229	0.0216	0.7403	1.4008	0.0287	44.76	0.92	0.74871	0.02578	0.00051	9e-05	9.62288	0.16423	58.06	0.98
650	0.10313	498.234	0.8669	31.9734	0.0759	0.5667	0.0261	0.0125	0.5991	0.504	0.0205	29.74	1.22	0.71703	0.03444	0.00092	0.00017	10.9306	0.19304	65.81	1.14
650	0.11813	1990.79	3.2724	53.5494	0.076	1.5712	0.022	0.0151	0.7968	4.7709	0.0235	70.81	0.37	0.51826	0.02732	0.00048	9e-05	10.8455	0.14422	65.3	0.85
700	0.12627	785.437	1.5093	29.0461	0.1238	0.6914	0.016	0.0088	0.5667	1.5991	0.0384	60.14	1.45	0.55664	0.03589	0.00065	0.00013	10.7701	0.39722	64.86	2.35
700	0.14	846.495	1.9741	49.029	0.1218	0.822	0.0191	0.0144	0.7555	1.0259	0.0256	35.74	0.9	0.53832	0.02832	0.00051	8e-05	11.0785	0.16212	66.68	0.96
750	0.14645	301.922	0.5336	23.0042	0.0838	0.327	0.0191	0.0085	0.6379	0.2025	0.0186	19.63	1.82	0.68141	0.05097	0.00045	0.00018	10.5267	0.24279	63.42	1.44
750	0.15761	673.971	1.9371	39.8529	0.0937	0.655	0.0162	0.0106	0.7361	0.8553	0.0293	37.43	1.29	0.49042	0.03392	0.00042	9e-05	10.5643	0.2242	63.64	1.33
800	0.16296	254.909	0.5323	19.0911	0.0534	0.2816	0.0166	0.005	0.5565	0.2288	0.0213	26.42	2.48	0.47992	0.05352	0.00044	0.00019	9.80488	0.33263	59.14	1.97
800	0.17256	600.447	1.3388	34.2766	0.0957	0.6242	0.0175	0.0074	0.5822	0.8236	0.0221	40.5	1.09	0.39668	0.03119	0.00069	0.00011	10.4068	0.19635	62.71	1.16
850	0.17848	266.041	0.5003	21.1214	0.1039	0.369	0.021	0.004	0.5693	0.1771	0.0176	19.59	1.96	0.34999	0.0495	0.00115	0.00021	10.1055	0.25193	60.92	1.49
850	0.19077	721.786	1.2595	43.8792	0.0976	0.8126	0.0174	0.0074	0.6876	0.8705	0.0268	35.62	1.1	0.3083	0.02877	0.00092	9e-05	10.5724	0.18458	63.69	1.09
900	0.19854	355.286	0.8735	27.7206	0.119	0.4838	0.0162	0.0041	0.6683	0.1792	0.0232	14.84	1.94	0.273	0.04426	0.00122	0.00013	10.8902	0.25384	65.57	1.5
950	0.21202	582.094	1.2607	48.1344	0.1576	0.8173	0.0269	0.0066	0.6266	0.3312	0.0213	16.76	1.08	0.25304	0.0239	0.0011	0.00012	10.0425	0.13726	60.55	0.81
1000	0.22288	456.575	1.1827	38.7735	0.1633	0.6603	0.02	0.0063	0.6814	0.1899	0.0265	12.21	1.72	0.29685	0.03228	0.00119	0.00011	10.3127	0.20896	62.15	1.24
1000	0.2462	1227.91	3.2821	83.2406	0.2089	1.6135	0.0409	0.013	0.8456	1.269	0.0245	30.51	0.6	0.28742	0.01866	0.00128	0.0001	10.2308	0.09903	61.66	0.59
1000	0.26767	1391.08	3.0593	76.6166	0.2389	1.6689	0.0268	0.0137	0.6843	1.9228	0.0367	40.83	0.79	0.32843	0.01643	0.0014	8e-05	10.7267	0.15091	64.6	0.89
1050	0.27617	435.832	1.1829	30.3507	0.0547	0.6818	0.016	0.0068	0.5732	0.3307	0.0253	22.34	1.72	0.4109	0.03467	0.0021	0.00012	11.1305	0.25064	66.99	1.48
1050	0.2999	1479.55	2.571	84.7305	0.2633	2.1542	0.0292	0.0225	0.7957	1.6239	0.0203	32.36	0.41	0.48708	0.0173	0.0024	7e-05	11.7927	0.08529	70.9	0.5
1050	0.32044	1565.96	3.2469	73.3007	0.2238	1.9881	0.0261	0.0172	0.6473	2.1474	0.0379	40.49	0.72	0.43028	0.01626	0.00236	8e-05	12.6983	0.16391	76.23	0.96
1100	0.32805	476.126	1.1616	27.1669	0.1065	0.8189	0.0615	0.0097	1.6018	0.4051	0.0374	25.01	2.32	0.65609	0.10827	0.00356	0.00048	13.123	0.41205	78.72	2.42
1200	0.37255	2701.84	1.6607	158.856	0.4636	3.8865	0.0421	0.0334	0.8308	1.4532	0.0387	15.82	0.42	0.38617	0.00966	0.00259	6e-05	14.2946	0.08384	85.58	0.49
1450	0.99868	43407	25.0919	2234.95	3.593	50.0072	0.1443	0.2762	2.1451	27.2638	0.0541	18.54	0.04	0.22678	0.0018	0.00203	2e-05	15.799	0.02872	94.36	0.17
1500	1	887.336	0.7726	4.7041	0.0629	0.6284	0.0154	0.001	0.6469	2.661	0.042	88.62	1.4	0.39864	0.25246	0.00366	0.00077	21.4638	2.65981	127.02	15.2
Integrated		74608.6	27.4039	3569.57	3.6974	83.9915	0.2093	0.6127	5.6007	83.0272	0.1909	32.86	0.08	0.31498	0.0029	0.00184	1e-05	14.0142	0.02281	83.94	0.35
10ANK03 FS#F1
Weighted	average	of	J	from	standards	=	0.003403	±	1.328e-05	(1-sigma	error)
Days since irradiation = 189
Temperature	Cumulative	40Ar	±	39Ar	±	38Ar	±	37Ar	±	36Ar	±	% Atm.	±	Ca/K	±	Cl/K	±	40Ar*/39ArK	±	Age	±
(°C)	39Ar	mV	mV	mV	mV	mV	mV	mV	mV	mV	mV	40Ar								(Ma)	(Ma)
300	0.00208	1209.2	3.3391	5.8023	0.0401	0.9974	0.0115	0.0082	1.314	3.8443	0.0289	93.9	0.75	2.58528	0.41674	0.00792	0.00047	12.7157	1.58381	76.33	9.31
300	0.00344	399.157	0.9967	3.7856	0.0252	0.373	0.0134	0.0034	1.3201	1.2515	0.0211	92.61	1.58	1.6423	0.64075	0.00553	0.00078	7.79785	1.67047	47.19	9.98
350	0.00573	338.93	0.8193	6.3861	0.0365	0.4829	0.0161	0.0045	1.463	0.5539	0.0314	48.21	2.74	1.28997	0.42084	0.0103	0.00057	27.485	1.46584	161.11	8.22
350	0.00884	278.413	0.9441	8.6824	0.0506	0.3283	0.0119	0.0045	1.3984	0.8689	0.0251	92.18	2.69	0.9605	0.29579	0.00183	0.00031	2.50717	0.8627	15.31	5.25
400	0.01617	579.859	0.9318	20.4474	0.0738	0.9158	0.0088	0.0046	1.3621	0.4352	0.0233	22.14	1.19	0.41616	0.12228	0.00638	0.00011	22.0615	0.34916	130.44	1.99
400	0.02807	364.721	0.6915	33.1706	0.0739	0.6207	0.02	0.0075	1.3515	0.7926	0.0251	64.22	2.05	0.41745	0.07479	0.0008	0.00013	3.92409	0.22525	23.9	1.36
450	0.04402	394.598	0.9151	44.4766	0.0572	0.777	0.0253	0.0089	1.3255	0.2922	0.0239	21.77	1.79	0.36742	0.0547	0.00122	0.00012	6.91856	0.16015	41.93	0.96
450	0.0676	571.566	1.2957	65.7516	0.1605	1.0127	0.0188	0.0135	1.344	0.8194	0.028	42.31	1.46	0.37637	0.03753	0.00056	6e-05	4.99815	0.12801	30.39	0.77
500	0.08968	570.328	1.1896	61.5702	0.1387	1.004	0.0158	0.017	1.3795	0.3086	0.0219	15.79	1.14	0.50721	0.04114	0.00104	6e-05	7.77656	0.1084	47.06	0.65
500	0.12192	888.287	1.7382	89.9167	0.1182	1.2561	0.0152	0.0225	1.4288	0.7811	0.0275	25.85	0.92	0.45872	0.02917	0.0004	4e-05	7.30421	0.09283	44.24	0.56
550	0.14488	624.719	1.1347	64.0259	0.242	0.8877	0.0156	0.0171	1.3958	0.2874	0.0244	13.41	1.16	0.49059	0.04006	0.00055	5e-05	8.42491	0.11851	50.93	0.71
550	0.17037	837.335	1.4825	71.076	0.188	1.0194	0.0222	0.0133	0.651	0.7416	0.0257	26.1	0.91	0.34438	0.01683	0.00041	7e-05	8.68467	0.11125	52.48	0.66
600	0.19496	5937.97	5.7169	68.5643	0.1654	4.2555	0.0237	0.0112	0.427	17.8052	0.0652	88.62	0.34	0.29876	0.01145	0.00065	8e-05	9.85213	0.29408	59.42	1.74
600	0.24824	1907.63	4.5334	148.56	0.3503	2.1192	0.0201	0.0167	0.6739	1.4427	0.0349	22.33	0.54	0.20575	0.00834	0.00042	3e-05	9.95138	0.07944	60.01	0.47
650	0.27643	964.399	1.8296	78.6012	0.1619	1.1036	0.0246	0.0167	0.5573	0.3691	0.0233	11.19	0.72	0.38977	0.01304	0.00057	7e-05	10.8714	0.09333	65.46	0.55
650	0.32455	1828.24	3.5755	134.163	0.297	1.9401	0.019	0.013	0.525	1.0219	0.021	16.49	0.34	0.17714	0.00719	0.00055	3e-05	11.3552	0.05898	68.31	0.35
700	0.34425	5913.31	5.6939	54.9301	0.1238	4.1277	0.0318	0.0147	0.3705	18.1538	0.0641	90.72	0.33	0.49129	0.01243	0.00062	0.00013	9.98634	0.36082	60.22	2.14
700	0.3722	11807.6	11.2611	77.9199	0.1247	7.9497	0.0488	0.0059	0.5531	36.9464	0.0553	92.48	0.16	0.13987	0.01303	0.00062	0.00013	11.3991	0.2553	68.57	1.51
750	0.38804	5803.53	5.5902	44.1685	0.1408	3.9801	0.0385	0.0059	0.5102	18.0954	0.0778	92.15	0.41	0.24307	0.02121	0.00065	0.0002	10.3137	0.537	62.16	3.18
750	0.4113	11320.7	10.8009	64.8726	0.1651	7.6637	0.0654	0.005	0.479	35.9912	0.1062	93.96	0.29	0.14107	0.01356	0.00084	0.00022	10.5403	0.51236	63.5	3.03
800	0.42367	5738.94	5.5291	34.4791	0.0714	3.898	0.0491	0.0027	0.4077	18.3328	0.0365	94.41	0.21	0.14393	0.0217	0.00068	0.0003	9.30427	0.35216	56.17	2.09
800	0.44348	11008.6	10.506	55.2312	0.1824	7.3519	0.0328	0.0026	1.146	34.985	0.0598	93.92	0.18	0.08747	0.03807	0.00089	0.00013	12.1153	0.37426	72.8	2.2
850	0.4556	5840.97	5.6254	33.7971	0.1408	3.9469	0.0535	0.0024	0.3728	18.592	0.0473	94.07	0.26	0.12874	0.02025	0.00074	0.00034	10.2448	0.44801	61.75	2.65
900	0.47192	6549.49	6.2942	45.5072	0.0941	4.4853	0.0396	0.0019	0.4427	20.524	0.0491	92.62	0.24	0.07479	0.01785	0.0008	0.00019	10.624	0.34806	63.99	2.06
950	0.50448	7414.43	7.1123	90.7578	0.1561	5.4498	0.0462	0.0041	0.4623	21.4585	0.0527	85.55	0.23	0.0827	0.00935	0.00114	0.00011	11.8021	0.18961	70.95	1.12
1000	0.53467	-669.705	11.0998	84.1787	0.1686	0.2115	0.0426	0.0044	0.4836	-5.8697	0.0929	258.09	5.9	0.09692	0.01054	0.00107	0.00012	12.6243	0.35272	75.79	2.07
1000	0.58609	7512.54	17.3018	143.369	0.3381	6.03	0.0736	0.0069	0.6322	18.7175	0.1165	73.66	0.49	0.08837	0.00809	0.00152	0.00011	13.7958	0.27068	82.67	1.59
1000	0.62245	12594.6	21.6548	101.368	0.168	8.7171	0.0558	0.0044	0.6579	36.3699	0.117	85.35	0.31	0.08042	0.01191	0.00178	0.00012	18.1979	0.4037	108.26	2.33
1050	0.64401	3144.58	13.8003	60.1347	0.1906	2.5415	0.0397	0.0043	0.3873	7.3747	0.1287	69.33	1.25	0.13221	0.01182	0.00187	0.00016	16.0303	0.67484	95.71	3.92
1050	0.6799	12469.1	21.5455	100.056	0.1193	8.759	0.0605	0.005	0.6372	35.1818	0.112	83.39	0.3	0.09224	0.01169	0.00239	0.00013	20.6922	0.39551	122.61	2.27
1050	0.7042	16910.7	25.4797	67.7588	0.1206	10.8612	0.122	0.0037	0.5362	50.3459	0.1404	87.98	0.28	0.10021	0.01452	0.0023	0.00039	29.9863	0.72073	175.08	4.01
1100	0.72405	8343.43	18.0016	55.3206	0.1877	5.7028	0.0668	0.004	0.5072	23.8198	0.1238	84.38	0.47	0.13258	0.01683	0.00255	0.00027	23.5615	0.74153	138.97	4.21
1200	1.00007	22071.9	30.14	769.56	1.1539	20.7985	0.0608	0.0151	0.9127	30.7946	0.1296	41.27	0.18	0.03593	0.00218	0.00191	2e-05	16.8286	0.06818	100.34	0.4
1450	1.00005	23651.9	31.5799	-0.0489	0.0498	14.3566	0.0347	-0.0003	0.4922	75.018	0.1744	93.73	0.25	9.98467	21.2098	-1.43392	1.47228	-30436.5	31137.8	-374883988860951	1861.56
1500	1	24802.7	32.6313	-0.1363	0.0626	15.0033	0.0603	0.0001	0.419	79.0023	0.1655	94.12	0.23	-0.88367	5.6499	-0.36304	0.19593	-10687.1	4928.2	-7.18169e+11	854.49
Integrated		219925	78.452	2788.2	1.4887	160.928	0.2608	0.2754	5.3599	605.449	0.4753	81.37	0.07	0.18127	0.00353	0.0014	2e-05	14.6894	0.05823	87.89	0.48

## Sheet: This study--Detrital BI Ar
This study--Detrital BI Ar
Modern River Sediment		Location	(WGS84)	Elv. (m)
Sample Name		Lat (°N)	Long (°W)		Rock Type	Zircon U-Pb Age (Ma)	Uncertainty (Ma)	MSWD	Nage=	Ntotal=	North or south of Denali Fault
Nenana Gl.		63.4908	147.804	959	Sand	N/A	N/A	N/A	N/A	100	Both
West Fork R.		63.3496	147.522	806	Sand	N/A	N/A	N/A	N/A	103	Both
Susitna R.		63.4191	147.222	792	Sand	N/A	N/A	N/A	N/A	118	Both
Black Rapids R.		63.5052	145.894	695	Sand	N/A	N/A	N/A	N/A	108	Both
West fork Gl. detrital biotite
Weighted average of J from standards = 3.467e-03 ｱ 1.088e-05 (1-sigma error)
Days since irradiation = 43
Grain #	Cumulative	40Ar	±	39Ar	±	38Ar	±	37Ar	±	36Ar	±	% Atm.	±	Ca/K	±	Cl/K	±	40Ar*/39ArK	ｱ	Age	±	% uncertainty
	39Ar	mV	mV	mV	mV	mV	mV	mV	mV	mV	mV	40Ar								(Ma)	(Ma)
1	0.00207	11240.9	106.411	99.3046	0.6737	38.6068	0.3008	0.0317	0.2159	34.428	0.1898	90.5	0.99	0.58521	0.00563	0.06586	0.00079	10.748	1.21378	65.93	7.31	11.0875
2	0.01815	8769.21	83.1204	772.388	7.3195	164.223	1.4959	0.0516	0.5387	16.3264	0.1512	55.11	0.73	0.12259	0.00173	0.04163	0.00058	5.08327	0.13143	31.48	0.81	2.57306
3	0.02412	19769.2	187.01	287.011	2.5121	90.1001	0.8077	0.0374	0.1929	58.9673	0.5365	88.16	1.16	0.23897	0.00243	0.05567	0.00078	8.15015	0.8573	50.22	5.21	10.3744
4	0.03497	6971.52	66.1632	521.119	9.8884	69.6281	1.4095	0.0164	0.2896	0.9992	0.0189	4.23	0.09	0.05783	0.0015	0.02579	0.00078	12.7846	0.27452	78.16	1.64	2.09826
5	0.03825	40664.7	384.34	157.965	0.8897	86.0184	0.4599	0.1413	0.7112	128.558	0.6474	93.4	1	1.64246	0.01241	0.08027	0.00078	16.9941	2.72125	103.17	16.06	15.5665
6	0.05619	3969.98	37.8232	861.575	22.0587	43.7401	1.0786	0.0057	0.1553	1.4646	0.0402	10.96	0.32	0.01204	0.00045	0.0084	0.00038	4.07637	0.11476	25.29	0.71	2.80743
7	0.0647	12997.7	123.068	409.078	4.4961	92.9466	0.8958	0.054	0.5311	35.5148	0.342	80.78	1.09	0.24213	0.00357	0.04212	0.00067	6.10057	0.39508	37.72	2.42	6.41569
8	0.06815	2246.89	21.9931	165.375	3.0224	28.6685	0.5357	0.0121	0.2751	4.7993	0.1247	63.21	1.76	0.13433	0.00392	0.03308	0.00094	4.98767	0.27524	30.9	1.69	5.46926
9	0.0817	33680	318.766	650.949	4.013	93.4263	0.4561	0.1422	1.0026	98.0171	0.5991	86.01	0.97	0.40097	0.00376	0.02204	0.00021	7.23407	0.56202	44.64	3.43	7.68369
10	0.09341	23961.8	227.029	562.545	8.2903	82.3933	0.8413	0.1352	1.2915	70.7579	0.7074	87.27	1.2	0.44109	0.00775	0.02363	0.0005	5.41793	0.55453	33.54	3.4	10.1371
11	0.0998	1250.45	42.854	307.411	10.827	7.6511	0.2453	0.0019	0.0699	1.1757	0.0656	27.97	1.84	0.01161	0.00058	0.00288	0.00025	2.90841	0.18472	18.08	1.14	6.30531
12	0.11005	7452.7	71.1204	492.311	8.9942	112.106	2.0382	0.0421	0.661	16.8625	0.2383	66.94	1.14	0.15691	0.00378	0.04429	0.00122	4.99447	0.22305	30.94	1.37	4.42793
13	0.11907	2417.58	23.6044	433.014	10.9227	24.7346	0.6906	0.0041	0.0953	0.6759	0.0296	8.29	0.37	0.01735	0.0006	0.00974	0.00045	5.09299	0.1417	31.54	0.87	2.7584
14	0.12841	4398.24	42.291	449.082	10.4501	53.5828	1.2145	0.0716	1.5956	8.9364	0.207	60.09	1.51	0.29268	0.00943	0.02209	0.0008	3.8975	0.18915	24.19	1.17	4.83671
15	0.13693	8918.45	84.9423	409.228	6.0157	79.8642	1.1238	0.0527	0.6442	23.7784	0.2902	78.85	1.22	0.23649	0.00452	0.03651	0.00081	4.60448	0.30273	28.54	1.86	6.51717
16	0.14446	2353.93	23.0198	361.542	10.1274	47.0076	1.361	0.0259	0.6007	3.3331	0.0966	41.94	1.29	0.13129	0.00478	0.02475	0.00109	3.76299	0.14688	23.36	0.91	3.89555
17	0.14716	8733.55	83.2033	129.917	1.6117	18.852	0.2253	0.0248	0.436	27.2855	0.3671	92.34	1.52	0.34998	0.00754	0.02004	0.00047	5.14921	1.05444	31.89	6.47	20.2885
18	0.14996	8149.34	77.6921	134.543	2.0126	27.9665	0.4162	0.0351	0.4981	25.4225	0.3964	92.19	1.69	0.47821	0.00987	0.03405	0.00085	4.72708	1.04732	29.3	6.44	21.9795
19	0.15526	1293.16	35.6405	254.315	7.4644	38.4461	1.2051	0.0022	0.0692	1.1027	0.0326	25.33	1.03	0.01569	0.00068	0.02938	0.00136	3.7746	0.18315	23.43	1.13	4.82288
20	0.15532	4245.78	40.9987	3.1009	0.0567	12.4369	0.259	0.0236	0.5808	14.1535	0.2951	98.46	2.26	14.0543	0.43285	0.66454	0.02176	21.1632	31.2486	127.6	181.89	142.547
21	0.15533	604.959	22.9033	0.2033	0.0322	1.3443	0.0535	0.0022	0.0744	2.0706	0.1159	101.11	6.83	20.0098	3.264	0.99456	0.16883	-33.3252	204.35	-221.26	1443.57	-652.432
22	0.15716	6157.64	59.0261	87.9574	1.7266	13.3101	0.2458	0.0152	0.2957	19.0791	0.3286	91.58	1.81	0.317	0.00876	0.02107	0.00076	5.89473	1.29726	36.46	7.94	21.7773
23	0.15853	2076.09	20.5539	66.1152	1.3439	13.289	0.3002	0.0093	0.1779	5.9358	0.1443	84.53	2.22	0.2579	0.0072	0.0365	0.00124	4.85349	0.72299	30.07	4.44	14.7655
24	0.15934	5502.56	52.8496	38.9203	0.7973	10.3632	0.2102	0.0259	0.4984	17.7155	0.389	95.12	2.28	1.22069	0.03433	0.03588	0.00143	6.90478	3.25503	42.63	19.86	46.5869
25	0.16422	4271.99	41.2416	234.345	5.7814	62.2601	1.5324	0.0252	0.5654	11.5345	0.2753	79.87	2.06	0.1971	0.00658	0.05167	0.00191	3.66436	0.39979	22.75	2.47	10.8571
26	0.16667	2489.52	24.4781	117.642	1.6058	26.2318	0.4029	0.0041	0.0794	6.6974	0.1329	79.59	1.76	0.0635	0.00151	0.0424	0.00094	4.31215	0.39785	26.74	2.45	9.1623
27	0.17225	4428.59	42.7456	267.94	5.5694	62.0834	1.3536	0.0194	0.4678	10.7717	0.2105	71.97	1.57	0.13295	0.00423	0.04489	0.00144	4.62514	0.29785	28.67	1.83	6.38298
28	0.17872	2468.37	24.286	310.971	7.4472	72.7322	1.9238	0.0097	0.2669	2.8311	0.0981	33.99	1.23	0.05725	0.00209	0.04657	0.00175	5.22033	0.17491	32.32	1.07	3.31064
29	0.19336	2737.46	26.8236	703.042	18.9174	28.153	0.7489	0.0019	0.0483	0.9673	0.0443	10.52	0.49	0.00484	0.00018	0.00616	0.00032	3.4577	0.103	21.48	0.64	2.97952
30	0.19974	8662.63	82.6973	306.69	4.1263	85.2972	1.1521	0.0289	0.2954	22.3767	0.2281	76.38	1.07	0.17286	0.00292	0.05335	0.00109	6.66382	0.35934	41.16	2.19	5.3207
31	0.20884	6306.95	60.4659	437.157	8.831	59.6373	1.1703	0.0541	0.9701	13.4208	0.2369	62.94	1.27	0.22726	0.00614	0.02525	0.00079	5.33624	0.23777	33.04	1.46	4.41889
32	0.21805	17196.3	163.259	442.574	5.7025	104.38	1.406	0.1755	2.0338	49.4865	0.5778	85.02	1.28	0.72782	0.01262	0.04296	0.00089	5.81834	0.53923	35.99	3.3	9.16921
33	0.2202	8286.72	79.135	103.268	1.2972	30.5586	0.5608	0.0201	0.2679	25.7993	0.3733	92.01	1.6	0.35805	0.00655	0.05015	0.00132	6.40762	1.31737	39.6	8.05	20.3283
34	0.23566	3716.16	36.0252	742.558	19.4025	119.506	2.9912	0.0057	0.1483	3.4234	0.0867	27.37	0.74	0.01401	0.00052	0.03142	0.00122	3.61316	0.11227	22.43	0.69	3.07624
35	0.23822	9319.22	88.8759	123.104	1.454	42.2469	0.668	0.0314	0.5128	28.5298	0.359	90.47	1.43	0.46818	0.00944	0.06079	0.00137	7.21136	1.12768	44.5	6.87	15.4382
36	0.25171	6525.46	62.5158	648.005	10.6796	50.1133	0.8235	0.1108	1.9542	12.1688	0.1909	55.13	1.02	0.31369	0.00757	0.01331	0.00037	4.50588	0.14992	27.94	0.92	3.29277
37	0.25449	2255.84	22.2736	133.349	3.7936	31.18	0.8895	0.0075	0.2242	5.2216	0.1411	68.49	1.97	0.10319	0.00426	0.04538	0.00195	5.32084	0.38583	32.94	2.37	7.1949
38	0.26084	4060.06	39.4277	305.269	6.3662	65.854	1.3787	0.01	0.2041	8.7947	0.2073	64.13	1.64	0.06038	0.00176	0.04198	0.00132	4.75982	0.25868	29.5	1.59	5.38983
39	0.26783	5129.47	49.5184	335.827	7.1878	41.316	0.8702	0.026	0.6113	8.4687	0.1792	48.84	1.14	0.14186	0.00451	0.02266	0.00076	7.79948	0.27328	48.08	1.66	3.45258
40	0.28067	2894.6	28.4714	616.937	15.886	71.3629	1.8851	0.0031	0.0854	2.9099	0.1041	29.89	1.11	0.00916	0.00035	0.02191	0.00089	3.26882	0.10876	20.31	0.67	3.29887
41	0.31498	30897.7	292.784	1648.23	12.4523	351.123	2.5962	0.1557	0.7342	75.5914	0.5402	72.37	0.86	0.17332	0.00154	0.04075	0.00046	5.17217	0.20612	32.03	1.27	3.96503
42	0.32824	13752.6	130.889	636.928	6.8948	149.195	1.5882	0.0264	0.2992	32.007	0.4139	68.85	1.11	0.07616	0.00119	0.04503	0.00073	6.71651	0.2906	41.48	1.77	4.26712
43	0.32884	1577.69	53.6084	28.9356	0.9411	14.7505	0.4656	0.0033	0.088	5.1989	0.1743	97.41	4.65	0.20954	0.00881	0.09781	0.0047	1.41053	2.56964	8.79	15.98	181.797
44	0.33198	6496.43	62.4854	150.397	2.4698	61.2517	1.0388	0.0145	0.2758	17.7425	0.3038	80.74	1.59	0.17638	0.00444	0.07871	0.00197	8.31355	0.7401	51.21	4.49	8.76782
45	0.33285	1541.82	58.1625	42.2446	1.4807	13.4808	0.4128	0.0219	0.616	4.7544	0.1487	91.08	4.47	0.95369	0.04284	0.06043	0.00301	3.25468	1.73016	20.22	10.69	52.8684
46	0.34069	9035.6	86.4433	376.249	4.2733	84.2949	0.9698	0.0341	0.5031	22.3708	0.2825	73.22	1.16	0.1661	0.0031	0.04253	0.00074	6.42346	0.32773	39.69	2	5.03905
47	0.34213	3276.06	32.1464	69.5617	1.7604	31.5889	0.7885	0.0203	0.4351	10.4895	0.2407	94.62	2.36	0.53593	0.01777	0.08727	0.00329	2.53105	1.1243	15.74	6.96	44.2186
48	0.3563	13167.8	125.451	680.502	7.4975	154.008	1.8052	0.0034	0.0593	2.2216	0.0546	4.99	0.13	0.00923	0.00019	0.04521	0.00076	18.3562	0.27492	111.19	1.61	1.44797
49	0.36675	12435.2	118.533	501.988	5.734	103.245	0.9844	0.0556	0.5339	33.5306	0.2837	79.74	1.02	0.20335	0.00303	0.03838	0.00062	5.01372	0.29494	31.06	1.81	5.82743
50	0.38599	4668.58	45.2761	924.085	18.7385	94.7209	1.8626	0.013	0.2086	4.0476	0.073	25.75	0.53	0.02574	0.00067	0.01916	0.00061	3.7293	0.09357	23.15	0.58	2.5054
51	0.4023	4842.76	46.919	783.707	15.381	90.9291	1.7178	0.0134	0.2482	6.4271	0.1016	39.38	0.73	0.03147	0.00085	0.02185	0.00066	3.72767	0.10242	23.14	0.63	2.72256
52	0.40408	5409.22	52.2589	85.4848	1.8649	35.6392	0.7506	0.0254	0.4167	15.8811	0.3128	86.76	1.9	0.54498	0.01488	0.07808	0.00255	8.37647	1.25595	51.59	7.63	14.7897
53	0.41871	3794.11	37.0345	702.969	17.0822	136.554	3.0981	0.0397	0.7664	1.8293	0.0688	14.24	0.56	0.10362	0.00322	0.0385	0.00135	4.60344	0.12763	28.54	0.78	2.73301
54	0.42064	7019.11	67.4465	92.497	1.5084	21.2214	0.359	0.0447	0.6319	20.7591	0.2768	87.38	1.44	0.88721	0.01915	0.0372	0.00104	9.57916	1.15717	58.88	7	11.8886
55	0.42453	10095.4	96.4666	186.891	2.0926	27.4509	0.2599	0.0364	0.3602	30.5434	0.3146	89.42	1.26	0.35708	0.00534	0.02224	0.00041	5.71153	0.71984	35.34	4.41	12.4788
56	0.42453	-17.2388	3.6973	-0.0684	0.0256	-0.0327	0.0182	0.0001	0.0611	-0.0745	0.0212	127.66	45.5	-1.36462	1.71637	0.05546	0.06099	-69.6752	109.429	-498.27	901.48	-180.922
57	0.42863	6283.24	60.5034	196.929	3.1636	34.6702	0.543	0.0223	0.2929	18.3787	0.3095	86.49	1.68	0.20773	0.00431	0.03112	0.00079	4.30818	0.56118	26.72	3.45	12.9117
58	0.43113	4399.63	42.7533	120.172	2.8856	13.862	0.3721	0.0327	0.7502	12.6471	0.2808	84.95	2.06	0.49919	0.01658	0.01791	0.00082	5.50607	0.78814	34.08	4.83	14.1725
59	0.43947	10500.6	100.301	400.76	3.9329	55.4876	0.5072	0.0729	0.6552	29.4306	0.3023	82.86	1.16	0.33387	0.00444	0.02401	0.00037	4.48693	0.33809	27.82	2.08	7.47664
60	0.44449	8567.43	82.0535	241.059	3.333	29.5063	0.4206	0.0193	0.1615	24.1933	0.2762	83.5	1.24	0.14708	0.00238	0.01957	0.00048	5.86092	0.48697	36.25	2.98	8.22069
61	0.44556	4469.12	43.4066	51.7499	1.0898	24.8128	0.5532	0.0223	0.4061	13.5791	0.252	89.78	1.88	0.79156	0.02204	0.08823	0.00295	8.82966	1.67634	54.34	10.16	18.6971
62	0.45019	8003.18	76.8313	222.391	2.8884	41.5575	0.5289	0.0155	0.2001	23.8224	0.2873	88.02	1.36	0.1279	0.00234	0.03285	0.00068	4.3094	0.518	26.73	3.19	11.9342
63	0.45666	14961.5	142.523	310.443	3.6724	55.7182	0.7077	0.0457	0.5121	44.9375	0.5879	88.78	1.44	0.26989	0.0044	0.02982	0.00061	5.40266	0.72678	33.44	4.46	13.3373
64	0.46456	3844.13	37.6468	379.684	8.9	82.1614	1.948	0.0219	0.4155	4.8584	0.1167	37.41	0.97	0.10604	0.0032	0.04275	0.00151	6.31869	0.20055	39.05	1.23	3.14981
65	0.47718	2414.17	24.2227	606.452	16.6409	104.284	2.7036	0.0082	0.2185	0.5769	0.0313	7.09	0.39	0.02469	0.00095	0.03388	0.00136	3.67114	0.11018	22.79	0.68	2.98376
66	0.49446	16271.6	154.893	829.966	9.857	177.327	1.957	0.0244	0.3243	25.0468	0.2489	45.54	0.63	0.05396	0.00096	0.04149	0.00072	10.6605	0.2425	65.41	1.46	2.23207
67	0.52184	21762.4	206.745	1315.25	16.1375	110.588	1.4094	0.2473	2.8677	52.926	0.6294	71.9	1.1	0.345	0.00583	0.01389	0.0003	4.64161	0.2191	28.77	1.35	4.69239
68	0.52189	249.966	10.8659	2.5616	0.0774	0.6732	0.0315	0.0007	0.0506	0.8513	0.0507	100.64	7.43	0.5349	0.0397	0.03996	0.00298	-0.62793	7.23032	-3.93	45.27	-1151.91
69	0.53321	3691.57	36.2544	543.891	13.2283	88.4609	2.0926	0.0355	0.7711	3.4924	0.0966	28	0.82	0.11984	0.00391	0.03171	0.00115	4.86577	0.1462	30.15	0.9	2.98507
70	0.54362	5425.21	52.5844	499.981	8.4466	51.1251	1.0696	0.0143	0.2817	12.9866	0.2619	70.91	1.59	0.05262	0.00136	0.01826	0.00057	3.14821	0.1947	19.56	1.2	6.13497
71	0.54518	9094.38	87.1971	74.9887	0.9071	21.9614	0.2321	0.0262	0.3453	28.8474	0.2677	93.73	1.25	0.64123	0.01147	0.04422	0.00087	7.60175	1.57309	46.88	9.58	20.4352
72	0.55159	7511.96	72.2683	307.652	4.5139	27.5888	0.4084	0.0475	0.6331	19.745	0.3057	77.71	1.42	0.28336	0.00562	0.01412	0.00037	5.4356	0.38451	33.65	2.36	7.01337
73	0.56569	7474.27	71.9063	677.324	9.3707	129.591	1.9679	0.0853	1.1623	11.5755	0.1621	45.79	0.78	0.23106	0.00449	0.03732	0.00082	5.96611	0.15217	36.9	0.93	2.52033
74	0.57021	6711.11	64.5702	217.369	3.2846	67.1477	1.013	0.0144	0.2232	16.9779	0.2693	74.81	1.39	0.12165	0.00263	0.05962	0.00135	7.77004	0.48602	47.9	2.96	6.17954
75	0.57689	12715.1	121.238	320.833	3.3046	45.4394	0.4713	0.0613	0.6939	36.7672	0.3361	85.47	1.13	0.3504	0.00537	0.02306	0.00041	5.75415	0.49216	35.6	3.01	8.45506
76	0.5902	7508.69	72.0964	639.692	7.9134	91.4109	1.187	0.0578	0.6786	14.2872	0.1692	56.31	0.86	0.16572	0.00283	0.02694	0.00053	5.11619	0.15121	31.69	0.93	2.93468
77	0.60249	7171.94	68.9222	590.332	8.7052	83.1072	1.1999	0.0196	0.3277	15.7677	0.1503	65.1	0.88	0.06082	0.00136	0.02632	0.0006	4.22938	0.15245	26.23	0.94	3.58368
78	0.61076	24874	236.075	396.975	4.1443	75.7744	0.7901	0.1037	1.075	75.2548	0.6663	89.41	1.16	0.47927	0.00705	0.03046	0.00054	6.63383	0.77762	40.98	4.75	11.591
79	0.62476	6414.09	61.7653	672.597	9.4941	49.5312	0.5683	0.0797	0.8616	8.5747	0.1172	39.52	0.66	0.21744	0.00387	0.01277	0.00028	5.74964	0.1332	35.57	0.82	2.30531
80	0.62813	1672.42	34.1306	162.05	3.8884	16.2611	0.3877	0.0066	0.2134	3.649	0.1242	64.63	2.57	0.07529	0.00302	0.018	0.0007	3.64013	0.32158	22.6	1.98	8.76106
81	0.63243	6123.23	59.4671	206.424	3.9492	38.2283	0.7133	0.0283	0.3952	17.0912	0.2827	82.52	1.58	0.25194	0.00597	0.03345	0.001	5.17917	0.50674	32.07	3.11	9.69754
82	0.64063	5385.39	52.5072	394.146	6.2932	45.5489	0.7246	0.0644	0.9527	10.2922	0.125	56.5	0.88	0.29982	0.00653	0.02106	0.00054	5.93159	0.18867	36.68	1.16	3.16249
83	0.64309	8458.53	81.4898	117.962	1.1653	17.6656	0.1272	0.0204	0.2102	26.4199	0.3181	92.32	1.42	0.31745	0.00453	0.02047	0.00034	5.50774	1.05624	34.09	6.48	19.0085
84	0.65315	2879.62	28.93	483.251	11.7449	24.5594	0.6119	0.0115	0.3077	4.8023	0.1242	49.49	1.38	0.04365	0.00158	0.00809	0.00037	2.99464	0.12149	18.61	0.75	4.03009
85	0.66002	5514.47	53.7273	330.124	5.5485	26.8767	0.4903	0.0467	0.8924	13.4086	0.2688	71.91	1.6	0.2595	0.00661	0.01331	0.00041	4.68442	0.30111	29.03	1.85	6.37272
86	0.66494	3019.84	29.9368	236.462	3.8214	54.1286	0.905	0.016	0.3223	5.5688	0.1227	54.58	1.32	0.12409	0.00321	0.04496	0.00111	5.78791	0.22	35.8	1.35	3.77095
87	0.6733	10191.2	97.5728	401.674	2.5101	81.4374	0.4096	0.0369	0.215	26.6047	0.1476	77.2	0.86	0.16856	0.00144	0.03779	0.00033	5.7778	0.26856	35.74	1.65	4.61668
88	0.67507	3616.88	35.5658	84.7985	1.9505	13.1414	0.3217	0.0118	0.1949	10.5841	0.221	86.51	2	0.2551	0.00723	0.02546	0.00102	5.75231	0.88708	35.59	5.43	15.2571
89	0.6829	2989.4	29.6566	376.325	7.7966	56.6754	1.3062	0.0038	0.0791	4.3341	0.1163	42.99	1.23	0.01845	0.00054	0.02898	0.00097	4.51156	0.15298	27.97	0.94	3.36074
90	0.68509	5209.43	50.5802	105.26	1.9743	28.3895	0.5279	0.0126	0.2701	15.3736	0.2344	87.24	1.58	0.22023	0.00626	0.04872	0.00142	6.31298	0.82363	39.02	5.04	12.9165
91	0.70088	14589.7	139.115	758.539	8.4599	173.316	2.2257	0.0664	0.7264	36.1111	0.4327	73.22	1.12	0.1606	0.00251	0.04392	0.0008	5.14412	0.25572	31.86	1.57	4.92781
92	0.70671	6448.12	62.2655	279.997	3.8907	50.2155	0.8492	0.0154	0.2267	17.641	0.2654	80.93	1.45	0.1011	0.00204	0.033	0.0008	4.38655	0.36289	27.2	2.23	8.19853
93	0.71525	7266.43	69.9852	410.314	5.8565	88.3973	1.1275	0.0455	0.5158	18.9128	0.196	76.99	1.09	0.20351	0.00371	0.04124	0.00085	4.06857	0.229	25.24	1.41	5.58637
94	0.72111	1652.14	39.2895	281.318	7.3121	15.5824	0.4384	0.0044	0.1204	2.3624	0.0885	42.45	1.89	0.02892	0.00109	0.00911	0.00044	3.36296	0.18954	20.89	1.17	5.60077
95	0.7264	17803.8	169.463	254.279	3.2953	64.0326	0.7164	0.0532	0.4705	57.3248	0.5997	95.16	1.35	0.38407	0.00603	0.04185	0.00083	3.38706	0.96546	21.04	5.96	28.327
96	0.73195	6274.63	60.6347	266.611	4.4233	42.6742	0.6788	0.0246	0.3214	16.9249	0.2361	79.77	1.35	0.16944	0.00358	0.02893	0.00074	4.75422	0.35573	29.46	2.19	7.43381
97	0.73345	8659.58	83.1198	71.9537	0.6599	62.5924	0.5191	0.0488	0.431	26.6137	0.22	90.79	1.15	1.2454	0.01586	0.16605	0.00217	11.0835	1.47089	67.95	8.85	13.0243
98	0.7414	2471.83	25.2527	381.88	8.3504	54.2891	1.2106	0.0018	0.0786	3.8744	0.1067	46.53	1.37	0.00873	0.00042	0.02726	0.00093	3.44544	0.13026	21.4	0.8	3.73832
99	0.7522	2467.3	25.213	518.981	11.4321	88.0421	2.0045	0.0234	0.5475	1.0704	0.0549	12.82	0.67	0.08267	0.00266	0.03335	0.00113	4.11878	0.10811	25.55	0.67	2.62231
100	0.76439	8844.27	85.2967	585.357	5.0653	72.1348	0.6511	0.0423	0.3435	21.3442	0.1629	71.42	0.88	0.13254	0.00157	0.02226	0.00032	4.31069	0.1715	26.73	1.06	3.96558
101	0.77043	4174.43	41.2692	290.588	6.2701	62.1677	1.2103	0.0207	0.4073	0.848	0.037	5.97	0.27	0.131	0.00382	0.04262	0.0013	13.48	0.32646	82.31	1.95	2.36909
102	0.77681	30294.4	287.835	306.505	2.01	139.615	1.0142	0.1325	0.7062	96.5581	0.6557	94.18	1.1	0.79323	0.00671	0.08113	0.00089	5.75462	1.13301	35.6	6.94	19.4944
103	0.78272	18542.4	176.88	283.673	2.9836	30.9694	0.3493	0.0466	0.5596	57.8094	0.7072	92.15	1.43	0.30143	0.00481	0.01274	0.00032	5.13015	0.96678	31.77	5.93	18.6654
104	0.79494	12436.2	119.21	587.427	6.6004	74.3059	0.8933	0.1108	0.9041	29.2489	0.3482	69.52	1.06	0.34619	0.00481	0.02242	0.00042	6.44403	0.27782	39.82	1.7	4.26921
105	0.79697	7928.14	76.6626	97.2444	1.1121	34.0887	0.3631	0.0516	0.5347	23.5062	0.2047	87.59	1.14	0.97478	0.01504	0.06196	0.00108	10.1167	1.01121	62.13	6.1	9.81812
106	0.81059	9031.97	87.074	654.583	6.8288	109.352	1.1574	0.1344	1.123	20.1854	0.1698	66.06	0.85	0.37681	0.00504	0.03169	0.00051	4.67361	0.16121	28.97	0.99	3.41733
107	0.8241	3211.09	32.2182	648.69	15.2865	141.111	3.2053	0.0035	0.1079	0.4927	0.0338	4.55	0.32	0.00998	0.00039	0.04346	0.00149	4.69646	0.12291	29.11	0.76	2.61079
108	0.8299	2802.86	28.3796	278.821	6.4204	65.3985	1.5903	0.0044	0.1218	5.2069	0.133	55.04	1.51	0.02916	0.00105	0.04633	0.00164	4.50585	0.20283	27.93	1.25	4.47547
109	0.84512	4476.69	44.1221	731.071	13.6589	126.297	2.2419	0.012	0.1887	3.567	0.06	23.64	0.46	0.03013	0.00074	0.0339	0.00093	4.6534	0.10903	28.84	0.67	2.32316
110	0.84809	8491.47	81.5659	142.504	1.2239	63.8746	0.5559	0.0255	0.2446	24.8968	0.2449	86.66	1.19	0.32895	0.00423	0.08509	0.00111	7.94705	0.7683	48.98	4.67	9.5345
111	0.85638	9133.26	87.6227	398.236	2.9592	91.6503	1.0879	0.0654	0.641	23.6224	0.2643	76.47	1.13	0.30122	0.00371	0.04382	0.00067	5.39041	0.29753	33.37	1.82	5.454
112	0.86558	2051.6	62.6834	442.268	12.8668	32.7268	1.0016	0.0161	0.4762	2.3585	0.0661	34.12	1.42	0.06697	0.00278	0.01314	0.00065	3.03636	0.17319	18.87	1.07	5.67038
113	0.87094	11567.1	110.596	257.192	2.7712	77.2675	0.8433	0.0484	0.5222	33.4746	0.2855	85.54	1.1	0.34505	0.00526	0.0558	0.00093	6.50065	0.54549	40.17	3.33	8.28977
114	0.8734	8029.97	77.2104	118.461	1.3769	25.4377	0.3229	0.0184	0.1561	24.4206	0.239	89.89	1.23	0.28557	0.00411	0.03481	0.00072	6.85273	0.88707	42.32	5.41	12.7836
115	0.88007	7474.09	71.9708	320.363	4.036	21.2864	0.2036	0.0109	0.108	20.6608	0.2113	81.78	1.15	0.06223	0.001	0.00923	0.0002	4.24597	0.30224	26.34	1.86	7.0615
116	0.88821	1707.72	28.9588	390.906	7.7293	19.6859	0.3862	0.0075	0.2008	0.392	0.0246	6.79	0.44	0.03543	0.00117	0.00834	0.00029	4.04422	0.11101	25.09	0.68	2.71024
117	0.8951	5901.02	57.2821	331.267	4.9715	35.7243	0.5562	0.0262	0.4607	14.6919	0.2048	73.66	1.25	0.14489	0.00335	0.01872	0.00047	4.68498	0.26132	29.04	1.61	5.54408
118	0.90308	1337.53	23.9319	383.213	7.6158	29.5041	0.69	0.0014	0.0495	0.6569	0.0357	14.63	0.84	0.00679	0.00027	0.01391	0.0005	2.95435	0.09041	18.36	0.56	3.05011
119	0.92092	36909.4	350.062	856.778	6.251	211.357	1.5232	0.1039	0.739	105.95	0.7796	84.86	1.02	0.22243	0.00227	0.04476	0.00051	6.51822	0.49149	40.27	3	7.44971
120	0.96252	16872.5	160.873	1998.57	23.6005	425.883	4.8507	0.0375	0.4883	27.2319	0.3173	47.84	0.72	0.0344	0.0006	0.04202	0.00073	4.38781	0.10678	27.21	0.66	2.42558
121	1	11195.5	107.252	1800.4	22.8827	119.396	1.5841	0.0401	0.4844	4.4565	0.0646	11.79	0.21	0.04088	0.00072	0.01164	0.00026	5.45912	0.09235	33.79	0.57	1.68689
Integrated		991995	1161.95	48039.8	91.1068	8086.11	13.8424	4.5866	6.9321	2470.15	3.2435	73.65	0.13	0.1752	0.00042	0.03114	9e-05	5.43373	0.03302	33.63	0.23	0.683913
Susitna Gl. detrital biotite
Weighted average of J from standards = 3.929e-03 ｱ 8.184e-06 (1-sigma error)
Days since irradiation = 82
Grain #	Cumulative	40Ar	±	39Ar	±	38Ar	±	37Ar	±	36Ar	±	% Atm.	±	Ca/K	±	Cl/K	±	40Ar*/39ArK	±	Age	±	% uncertainty
	39Ar	mV	mV	mV	mV	mV	mV	mV	mV	mV	mV	40Ar								(Ma)	(Ma)
1	0.0065	4866.05	18.4017	633.398	3.1131	18.1028	0.1144	0.0278	0.1833	3.6395	0.0324	22.14	0.21	0.08052	0.00066	0.00358	5e-05	5.95861	0.04403	41.7	0.3	0.719424
2	0.00653	1450.18	24.0345	3.5054	0.0531	1.5846	0.0186	0.0082	0.1035	4.9143	0.108	100.1	2.76	4.28541	0.08473	0.03779	0.00175	-0.40675	11.4127	-2.88	80.93	-2810.07
3	0.01458	4362.7	16.5155	784.369	6.414	13.8248	0.0936	0.0113	0.1682	1.4323	0.019	9.73	0.13	0.02652	0.00045	0.00144	4e-05	4.99397	0.04672	35.01	0.32	0.914025
4	0.01706	1324.04	23.1359	242.144	4.3837	5.2066	0.0922	0.0018	0.0838	0.472	0.0207	10.58	0.5	0.01377	0.00068	0.00225	0.00011	4.86297	0.13272	34.1	0.92	2.69795
5	0.02292	2966.8	11.2727	571.918	3.3354	11.2773	0.06	0.0177	0.1998	0.5056	0.0165	5.02	0.17	0.05664	0.00072	0.00191	3e-05	4.89918	0.03588	34.36	0.25	0.72759
6	0.0375	7735.14	29.1898	1421.05	14.2552	41.2669	0.4362	0.0869	0.8111	0.9452	0.0217	3.54	0.08	0.11215	0.00154	0.00388	9e-05	5.22228	0.05673	36.6	0.39	1.06557
7	0.0439	3366.25	12.9401	624.508	5.2887	14.2537	0.1608	0.0131	0.1444	0.6489	0.0198	5.7	0.18	0.03851	0.00054	0.00256	7e-05	5.05529	0.0487	35.44	0.34	0.959368
8	0.04503	906.504	21.0636	110.067	2.6304	2.2519	0.048	0.0019	0.143	1.1764	0.0324	38.47	1.39	0.03167	0.0025	0.00168	0.00013	5.04951	0.24274	35.4	1.69	4.77401
9	0.04527	3835.15	14.7001	22.746	0.2612	10.6745	0.1702	0.0165	0.1994	12.29	0.2074	94.68	1.64	1.32997	0.0222	0.07519	0.00184	8.9789	2.7748	62.47	18.98	30.3826
10	0.06874	11877.4	44.8753	2289.26	27.1291	51.5705	0.5578	0.1	1.1205	1.0999	0.0251	2.68	0.06	0.08014	0.00131	0.00252	8e-05	5.02041	0.06306	35.2	0.44	1.25
11	0.07955	5303.56	20.2758	1053.52	24.16	40.682	0.9128	0.0251	0.5734	1.1453	0.0285	6.38	0.16	0.04366	0.00141	0.00587	0.00026	4.68523	0.11012	32.87	0.77	2.34256
12	0.09566	8444.79	32.0006	1571.13	18.7164	40.59	0.439	0.0766	0.9253	0.7338	0.0226	2.51	0.08	0.08944	0.00152	0.00322	9e-05	5.21147	0.06581	36.52	0.46	1.25958
13	0.10619	5655.38	21.8976	1026.83	20.8155	18.6295	0.3924	0.0616	1.1632	1.5456	0.0511	8.03	0.27	0.1101	0.00305	0.00156	0.00011	5.03829	0.10596	35.32	0.74	2.09513
14	0.13408	19100.6	72.2132	2719.31	10.2219	76.194	0.9215	0.1033	1.3467	16.3784	0.2406	25.4	0.39	0.06969	0.00095	0.00346	7e-05	5.21784	0.04217	36.57	0.29	0.793
15	0.14141	3753.87	14.882	715.045	16.6201	15.7766	0.3509	0.0248	0.5695	0.708	0.03	5.55	0.24	0.06358	0.00208	0.0024	0.00015	4.93054	0.11781	34.57	0.82	2.372
16	0.14629	2988.77	12.0744	475.646	12.01	8.6549	0.2412	0.0088	0.2698	2.1117	0.0659	20.95	0.66	0.03408	0.00135	0.00145	0.00014	4.94357	0.13451	34.66	0.93	2.68321
17	0.14893	1528.73	24.9393	257.708	4.5525	5.5105	0.084	0.0023	0.1732	0.7808	0.0289	15.16	0.61	0.01604	0.00126	0.00218	0.0001	5.00779	0.13559	35.11	0.94	2.6773
18	0.15425	1722.62	22.1194	518.032	7.4463	30.1845	0.4886	0.0006	0.1702	0.6773	0.0297	11.72	0.54	0.00207	0.0006	0.00999	0.00026	2.90937	0.0624	20.48	0.44	2.14844
19	0.16116	3274.62	13.1146	674.399	8.9488	67.8322	1.0203	0.0065	0.1401	4.8484	0.0693	44	0.65	0.01778	0.00045	0.01865	0.00042	2.70232	0.05114	19.03	0.36	1.89175
20	0.1762	7487.2	28.7353	1466.79	21.785	41.4444	0.5155	0.1328	2.1028	1.9406	0.05	7.56	0.2	0.16618	0.00361	0.00369	0.00011	4.69159	0.07351	32.91	0.51	1.54968
21	0.19403	8765.85	33.4828	1738.53	13.6403	31.9922	0.2858	0.0858	0.7001	0.9419	0.036	3.11	0.12	0.09057	0.00103	0.00165	5e-05	4.85655	0.04334	34.06	0.3	0.880799
22	0.20148	4105.77	16.2221	726.069	18.4085	14.5456	0.385	0.0255	0.5896	1.7424	0.0546	12.56	0.4	0.06453	0.00221	0.00192	0.00015	4.91897	0.12937	34.49	0.9	2.60945
23	0.208	3381.76	13.5266	635.369	13.9978	13.6072	0.3024	0.0041	0.1502	0.6747	0.0392	5.92	0.35	0.01192	0.00051	0.00226	0.00014	4.97958	0.11387	34.91	0.79	2.26296
24	0.21191	2249.57	9.4307	381.438	4.8872	6.9547	0.0995	0.0035	0.1334	1.1957	0.0357	15.77	0.48	0.01689	0.00068	0.00151	7e-05	4.94237	0.07372	34.66	0.51	1.47144
25	0.22388	6125.1	23.7188	1167.02	17.2112	22.5591	0.3998	0.0458	0.791	1.2108	0.0338	5.81	0.17	0.07201	0.00164	0.00183	9e-05	4.91556	0.0762	34.47	0.53	1.53757
26	0.2263	1318.23	23.3098	236.599	3.8678	34.0481	0.5835	0.0004	0.0906	0.5203	0.029	11.72	0.69	0.00294	0.0007	0.02794	0.00071	4.8922	0.13227	34.31	0.92	2.68143
27	0.24668	11238.4	42.7829	1986.41	15.463	57.1053	0.4778	0.0597	0.4413	2.1983	0.046	5.77	0.12	0.05514	0.00059	0.0038	7e-05	5.3035	0.04727	37.16	0.33	0.888052
28	0.26187	7831.46	30.0872	1481.98	20.1665	33.3401	0.4745	0.0641	0.7811	1.0635	0.0382	3.97	0.15	0.0794	0.00145	0.0025	9e-05	5.04642	0.0724	35.38	0.5	1.41323
29	0.26302	5631.69	21.9191	112.115	2.4345	7.1875	0.1432	0.0138	0.3395	16.7673	0.3225	88.01	1.73	0.22603	0.00741	0.0054	0.00033	6.01896	0.88214	42.12	6.1	14.4824
30	0.28425	12620.9	47.9727	2070.1	20.8521	45.9071	0.5156	0.0925	0.9732	6.0668	0.0555	14.21	0.14	0.08199	0.00119	0.00235	7e-05	5.20488	0.05814	36.48	0.4	1.09649
31	0.29035	2589.55	11.0065	594.082	9.2804	21.089	0.3505	0.0005	0.0856	0.2338	0.0324	2.69	0.37	0.00158	0.00027	0.00525	0.00017	4.21297	0.07068	29.58	0.49	1.65652
32	0.30253	5485.74	21.5952	1187.74	25.5279	96.3272	2.0486	0.0041	0.1241	1.6208	0.0417	8.78	0.23	0.00636	0.00024	0.01479	0.00051	4.18598	0.09299	29.39	0.65	2.21164
33	0.31585	7033.4	27.3081	1299.02	20.0129	30.2142	0.4592	0.0322	0.3897	1.6043	0.0331	6.74	0.14	0.04552	0.00089	0.00264	0.00011	5.02189	0.08097	35.21	0.56	1.59046
34	0.32142	2781.86	11.6921	543.114	10.7689	10.6021	0.246	0.0049	0.152	0.434	0.0341	4.62	0.36	0.01657	0.00061	0.00188	0.00012	4.85698	0.10097	34.06	0.7	2.0552
35	0.33081	4516.8	17.986	915.811	16.8258	17.2392	0.3282	0.0104	0.2797	0.4924	0.0347	3.22	0.23	0.02084	0.00068	0.00174	0.0001	4.74442	0.09058	33.28	0.63	1.89303
36	0.3374	3488.58	14.2254	642.42	10.637	21.2436	0.3735	0.0217	0.4094	0.2492	0.0375	2.07	0.32	0.06197	0.00156	0.00474	0.00017	5.28894	0.09243	37.06	0.64	1.72693
37	0.34778	5411.18	21.184	1011.85	12.451	19.3268	0.2388	0.0662	0.8259	1.3282	0.0248	7.19	0.14	0.11998	0.0021	0.00177	7e-05	4.93585	0.065	34.61	0.45	1.3002
38	0.35408	3296.82	13.4147	613.977	7.1747	11.8371	0.1636	0.0218	0.3034	0.6506	0.0234	5.81	0.21	0.0651	0.00118	0.00182	7e-05	5.02984	0.06403	35.26	0.44	1.24787
39	0.35682	1499	17.8481	267.433	2.8547	6.5119	0.0807	0.0017	0.0944	0.457	0.027	9.05	0.54	0.0118	0.00066	0.00285	8e-05	5.07103	0.09113	35.55	0.63	1.77215
40	0.35735	1513.12	20.8617	51.7189	0.568	8.5829	0.1158	0.0072	0.1048	3.9667	0.0441	77.51	1.37	0.25576	0.00466	0.02965	0.00059	6.5752	0.48126	45.96	3.32	7.22367
41	0.38968	16971.3	64.4418	3152.67	11.8513	69.3116	0.9071	0.2152	3.0075	1.8192	0.0399	3.08	0.07	0.12526	0.00181	0.0024	6e-05	5.18881	0.02858	36.37	0.2	0.549904
42	0.39409	2562.01	10.8138	430.168	11.218	9.9449	0.2283	0.0028	0.1424	1.4029	0.0477	16.25	0.56	0.01194	0.00068	0.00253	0.00017	4.96299	0.1366	34.8	0.95	2.72989
43	0.40289	6070.35	23.7142	858.135	17.4747	18.0199	0.3109	0.0286	0.5001	5.5944	0.1137	27.31	0.57	0.06124	0.00164	0.00196	0.00011	5.12062	0.11531	35.89	0.8	2.22903
44	0.41125	4262.97	17.0066	814.511	16.931	16.8859	0.3666	0.0211	0.5443	0.6021	0.0267	4.16	0.19	0.04762	0.00158	0.00213	0.00013	4.98786	0.10681	34.97	0.74	2.1161
45	0.41615	3485.6	14.1423	478.187	8.6625	17.6634	0.3732	0.0104	0.2146	3.7183	0.0829	31.63	0.72	0.04008	0.0011	0.00526	0.00021	4.9636	0.10809	34.8	0.75	2.15517
46	0.42028	2234.22	9.6446	402.807	5.2539	8.212	0.1239	0.002	0.0933	0.7621	0.0331	10.13	0.44	0.0093	0.00044	0.00201	8e-05	4.95826	0.07346	34.77	0.51	1.46678
47	0.42193	10437.8	39.9458	160.4	1.2766	23.2843	0.2364	0.0541	0.4786	32.4288	0.2648	91.81	0.83	0.6189	0.00737	0.02036	0.00036	5.33021	0.54946	37.35	3.81	10.2008
48	0.42564	1260.58	36.8759	362.344	10.0402	9.5609	0.2723	0.0009	0.1076	0.6272	0.0372	14.82	0.98	0.00455	0.00056	0.00328	0.00022	2.93796	0.13432	20.68	0.94	4.54545
49	0.43216	3173.32	13.2544	635.632	8.5277	14.5662	0.1794	0.0084	0.1659	0.1966	0.0294	1.82	0.28	0.02423	0.00058	0.00261	9e-05	4.87241	0.07034	34.17	0.49	1.43401
50	0.45389	10898.8	41.8889	2118.57	16.9402	44.0335	0.3987	0.0876	0.8007	0.7367	0.0276	1.94	0.08	0.07589	0.00092	0.00216	5e-05	5.01551	0.04509	35.16	0.31	0.881684
51	0.45698	2682.1	11.5207	301.562	7.4904	14.5459	0.411	0.0051	0.1888	3.885	0.1338	42.93	1.49	0.03116	0.00139	0.00743	0.00037	5.05888	0.18606	35.46	1.29	3.6379
52	0.47072	4990.78	19.8971	1340	10.3719	92.9912	0.7625	0.0246	0.2631	0.7372	0.0397	4.36	0.24	0.03368	0.00044	0.01236	0.00016	3.53374	0.03252	24.85	0.23	0.925553
53	0.4714	5857.57	23.1337	66.1587	0.8159	13.5659	0.1782	0.0955	1.2093	17.8772	0.205	90.08	1.09	2.65152	0.04691	0.03031	0.0007	8.78711	0.98722	61.16	6.76	11.053
54	0.47162	3206.33	13.4154	20.938	0.4433	6.206	0.1484	0.0526	1.0714	10.1047	0.2391	93.01	2.24	4.61523	0.13588	0.04121	0.00181	10.7222	3.4487	74.36	23.43	31.5089
55	0.47414	1321.64	22.7813	245.998	4.3473	5.5952	0.1014	0.0038	0.1353	0.2619	0.0456	5.86	1.03	0.0284	0.00113	0.00254	0.00012	5.02962	0.13989	35.26	0.97	2.75099
56	0.47942	2669.1	11.5739	514.714	9.1448	9.8701	0.1967	0.0068	0.1667	0.384	0.0389	4.25	0.43	0.02437	0.00074	0.00181	0.00011	4.93656	0.09376	34.62	0.65	1.87753
57	0.48285	1691.31	19.8196	335.019	4.2696	6.9907	0.1031	0.0037	0.15	-0.0416	0.0348	-0.75	0.61	0.01999	0.00086	0.00219	9e-05	5.05636	0.09298	35.45	0.65	1.83357
58	0.48797	2570.1	11.213	498.605	5.6945	12.8752	0.1866	0.0032	0.1575	0.1363	0.0491	1.57	0.57	0.01187	0.0006	0.00322	0.0001	5.04466	0.06863	35.37	0.48	1.35708
59	0.51859	16049.1	61.3609	2986.24	11.2244	58.2039	0.7438	0.0867	1.1308	3.4354	0.0921	6.32	0.17	0.0533	0.00072	0.00186	5e-05	5.00718	0.02939	35.11	0.2	0.569638
60	0.52493	3552.59	14.7914	618.355	12.7926	19.882	0.4017	0.0038	0.149	1.1479	0.0545	9.59	0.46	0.01124	0.0005	0.00449	0.00019	5.16752	0.11319	36.22	0.79	2.18112
61	0.53007	2739.99	11.9701	501.03	8.3747	11.5468	0.1914	0.0269	0.4348	0.817	0.0415	8.78	0.45	0.0984	0.00229	0.00258	0.00011	4.96178	0.09017	34.79	0.63	1.81087
62	0.53817	6377.89	25.2806	789.222	2.4837	11.5078	0.0525	0.0034	0.1507	2.0378	0.0484	9.47	0.23	0.0078	0.00035	0.00077	2e-05	7.28891	0.04342	50.88	0.3	0.589623
63	0.54258	2302.26	10.4221	430.028	7.1976	8.1924	0.1428	0.0011	0.1553	0.5058	0.0424	6.52	0.55	0.00452	0.00067	0.00176	0.0001	4.9767	0.09198	34.89	0.64	1.83434
64	0.54371	2795.38	12.1643	110.023	1.6362	4.7023	0.0807	0.0166	0.2689	7.4091	0.1792	78.36	1.93	0.27699	0.00609	0.00414	0.00019	5.49109	0.50064	38.46	3.47	9.02236
65	0.57502	15685.2	60.1274	3053.89	11.4816	51.4742	0.6676	0.2211	3.1899	2.0102	0.0557	3.69	0.11	0.13286	0.00198	0.00132	5e-05	4.91816	0.02762	34.49	0.19	0.550884
66	0.57825	2999.48	12.9323	314.635	7.3076	9.7044	0.2185	0.0098	0.2472	4.7735	0.1375	47.15	1.37	0.05693	0.00196	0.00369	0.0002	5.02296	0.17927	35.22	1.24	3.52073
67	0.58172	2600.12	11.0514	338.308	5.2954	6.6533	0.1365	0.0079	0.2053	3.1139	0.0954	35.5	1.1	0.04288	0.0013	0.00158	0.0001	4.93806	0.11857	34.63	0.82	2.36789
68	0.58382	32295.7	122.168	204.534	1.318	37.9552	0.3312	0.1327	1.0384	102.688	0.6678	93.94	0.71	1.19092	0.01208	0.01708	0.00038	9.56854	1.13696	66.5	7.76	11.6692
69	0.58409	4483.6	18.0061	26.3186	0.493	11.1038	0.2168	0.0197	0.3644	14.0397	0.2571	92.51	1.73	1.37763	0.03624	0.06551	0.00218	12.7628	2.9776	88.17	20.07	22.7628
70	0.58787	2035.2	61.3396	368.489	9.9921	7.6647	0.2233	0.0074	0.1815	0.6702	0.0551	9.75	0.86	0.0367	0.00134	0.0021	0.00017	4.95766	0.21898	34.76	1.52	4.37284
71	0.58801	2206.1	9.6599	14.2658	0.3454	9.0412	0.2223	0.026	0.5663	7.0646	0.2241	94.55	3.03	3.34347	0.1091	0.11162	0.00433	8.43956	4.7023	58.78	32.22	54.8146
72	0.59871	5874.36	23.1481	1043.55	15.5021	21.1009	0.3156	0.0234	0.2801	1.696	0.0309	8.54	0.16	0.04109	0.00078	0.00199	9e-05	5.12122	0.08015	35.9	0.56	1.55989
73	0.60929	5344.2	21.1543	1031.44	14.4912	21.3128	0.2923	0.0126	0.2629	0.5988	0.0336	3.31	0.19	0.0224	0.00056	0.00212	8e-05	4.98112	0.07396	34.92	0.51	1.46048
74	0.61357	3056.49	12.6924	417.43	8.1231	9.2915	0.1985	0.0337	0.7465	3.382	0.0742	32.74	0.73	0.14801	0.00437	0.00216	0.00013	4.90524	0.11362	34.4	0.79	2.29651
75	0.62081	3807.56	15.4538	705.307	11.2776	28.1714	0.4537	0.0383	0.4864	0.402	0.0307	3.05	0.24	0.09952	0.00203	0.00617	0.00019	5.20497	0.08747	36.48	0.61	1.67215
76	0.623	1037.2	13.0855	213.404	2.7074	3.8563	0.0578	0.0012	0.1508	0.0357	0.0234	1.01	0.67	0.01024	0.0013	0.0016	7e-05	4.78159	0.0924	33.54	0.64	1.90817
77	0.62633	2449.23	10.4632	325.284	4.1103	7.5482	0.1221	0.0051	0.1254	2.4694	0.0754	29.89	0.92	0.02903	0.0008	0.00238	0.0001	5.25792	0.10095	36.85	0.7	1.89959
78	0.63008	1695.01	18.4434	365.234	4.3114	21.6321	0.2579	0.0013	0.1563	1.0293	0.0255	18.05	0.49	0.00664	0.00079	0.01013	0.00021	3.77875	0.07069	26.56	0.49	1.84488
79	0.63261	5040.25	19.8681	246.703	5.3509	10.2509	0.2224	0.0289	0.5169	9.4452	0.1789	55.41	1.07	0.21464	0.00604	0.00503	0.00025	9.09773	0.30264	63.29	2.07	3.27066
80	0.63494	1707.45	46.1598	227.753	6.2094	13.6885	0.4162	0.0886	2.5995	3.7095	0.0993	64.02	2.45	0.71436	0.02861	0.0098	0.0005	2.68715	0.2514	18.92	1.76	9.30233
81	0.64503	3951.9	15.8199	983.286	21.5059	66.2031	1.4101	0.0369	0.6931	0.3598	0.0329	2.63	0.25	0.06879	0.00198	0.01193	0.00043	3.88443	0.08767	27.29	0.61	2.23525
82	0.64852	2499.13	10.4805	340.635	7.8602	24.3969	0.6406	0.0065	0.1982	3.641	0.0975	43.21	1.17	0.03516	0.00134	0.01243	0.00052	4.15004	0.13191	29.14	0.92	3.15717
83	0.66718	9532.26	36.589	1819.82	12.1439	35.3135	0.2457	0.0964	0.7848	1.1981	0.0304	3.65	0.1	0.09716	0.00102	0.00186	4e-05	5.01833	0.03954	35.18	0.27	0.767482
84	0.67003	1601.21	49.5937	277.642	7.73	5.8823	0.1503	0.0188	0.4855	0.8055	0.0413	14.85	0.89	0.12444	0.00472	0.00214	0.00017	4.88595	0.22929	34.26	1.59	4.64098
85	0.68136	5781.5	22.8226	1104.31	14.5584	43.0989	0.6705	0.0249	0.2674	0.7787	0.0376	3.97	0.19	0.04131	0.0007	0.00598	0.00017	4.99925	0.07017	35.05	0.49	1.398
86	0.69206	5945.6	23.4424	1043.68	13.9397	30.1745	0.3905	0.1195	1.66	1.1377	0.0363	5.52	0.18	0.21009	0.00405	0.00384	0.00011	5.35481	0.07605	37.52	0.53	1.41258
87	0.69737	5554.54	21.9932	517.391	8.612	22.8325	0.3848	0.0268	0.4514	9.4679	0.1455	50.47	0.8	0.0951	0.00225	0.00636	0.00021	5.30299	0.12881	37.16	0.89	2.39505
88	0.72711	15574.6	59.5241	2899.99	10.8997	62.809	0.8331	0.1184	1.4888	3.1083	0.0685	5.87	0.13	0.07495	0.00098	0.00231	6e-05	5.02765	0.02883	35.25	0.2	0.567376
89	0.73535	4400.93	17.7193	803.449	13.6503	14.0262	0.2404	0.0084	0.1842	1.1777	0.0366	7.93	0.25	0.01921	0.00053	0.00142	9e-05	5.0156	0.08953	35.16	0.62	1.76337
90	0.77762	20984.3	79.7491	4122.36	15.482	68.2605	0.3651	0.118	0.9189	2.5727	0.0355	3.6	0.05	0.05253	0.00045	0.00126	2e-05	4.8787	0.02684	34.21	0.19	0.555393
91	0.78265	2588.74	14.0325	490.54	10.6955	10.2593	0.2263	0.0106	0.2579	0.4055	0.0439	4.62	0.5	0.03973	0.0013	0.00217	0.00014	5.0052	0.11648	35.09	0.81	2.30835
92	0.79676	12184.3	47.8481	1375.01	15.8721	37.2252	0.4836	0.0529	0.4562	16.4642	0.1644	40.03	0.43	0.07055	0.00102	0.00302	0.0001	5.29657	0.07899	37.11	0.55	1.48208
93	0.80393	3727.05	17.5922	699.591	11.8256	16.3452	0.2905	0.0324	0.4978	0.5527	0.0415	4.33	0.33	0.08493	0.00194	0.00268	0.00012	5.06831	0.09147	35.53	0.63	1.77315
94	0.80648	1269.78	36.1255	249.048	6.1347	5.804	0.1613	0.0049	0.1658	-0.0294	0.0386	-0.72	0.9	0.03601	0.00151	0.00271	0.00018	5.10539	0.19785	35.79	1.37	3.82788
95	0.82029	7111.55	29.3091	1346.35	13.7736	30.4424	0.3244	0.098	0.9462	0.4225	0.0298	1.65	0.12	0.1336	0.00188	0.00254	7e-05	5.16594	0.05781	36.21	0.4	1.10467
96	0.82138	540.342	15.0951	106.108	1.9734	2.2833	0.0627	0.0006	0.1432	0.0157	0.0479	0.85	2.64	0.00978	0.00248	0.00232	0.00015	5.01949	0.21645	35.19	1.5	4.26257
97	0.83183	5352.32	21.166	1018.61	14.1467	23.891	0.292	0.0923	1.4951	0.475	0.0331	2.49	0.18	0.16619	0.00355	0.00272	9e-05	5.09484	0.07477	35.71	0.52	1.45617
98	0.83442	1749.29	21.0253	252.726	3.3626	5.4205	0.0743	0.0056	0.1458	1.4948	0.0554	25.33	0.99	0.0407	0.00119	0.00208	8e-05	5.14605	0.12593	36.07	0.87	2.41198
99	0.83585	702.432	8.718	139.28	1.415	3.5723	0.0411	0.0004	0.1196	-0.0446	0.0226	-1.89	0.96	0.0059	0.00158	0.00321	8e-05	5.10862	0.09458	35.81	0.66	1.84306
100	0.84137	2812.17	11.7318	538.192	8.064	10.0708	0.1368	0.0265	0.4127	0.4124	0.0272	4.28	0.29	0.09033	0.00195	0.00171	8e-05	4.97332	0.07949	34.87	0.55	1.57729
101	0.86274	12322.9	47.2596	2084.41	22.8273	43.025	0.4074	0.0296	0.3102	5.8444	0.0822	14.07	0.21	0.02605	0.00039	0.00203	6e-05	5.0549	0.06124	35.44	0.43	1.21332
102	0.87797	7552.61	29.388	1484.83	15.9966	29.8965	0.301	0.0509	0.4776	0.7357	0.0289	2.84	0.11	0.06287	0.0009	0.00202	6e-05	4.91335	0.0571	34.45	0.4	1.1611
103	0.89271	7667.76	29.8823	1436.75	14.5866	34.6614	0.3545	0.0369	0.3855	1.2984	0.025	4.99	0.1	0.04707	0.00069	0.00284	7e-05	5.04233	0.05577	35.35	0.39	1.10325
104	0.89977	3719.82	15.2443	688.65	13.7946	15.415	0.2915	0.0258	0.4437	0.7352	0.0398	5.81	0.32	0.06873	0.00181	0.00247	0.00013	5.05967	0.10571	35.47	0.73	2.05808
105	0.90311	1779.75	33.1168	325.353	6.8106	7.6476	0.1752	0.0019	0.1176	0.4702	0.0296	7.84	0.52	0.01053	0.0007	0.00269	0.00015	5.01398	0.1491	35.15	1.04	2.95875
106	0.90741	2287.51	10.0041	419.291	6.2866	9.737	0.1855	0.005	0.176	0.5417	0.0403	7.02	0.52	0.02183	0.00084	0.00263	0.00012	5.04524	0.08464	35.37	0.59	1.66808
107	0.90934	1009.19	11.7336	188.725	2.0063	3.6602	0.0368	0.0015	0.1514	0.2068	0.0305	6.08	0.9	0.01416	0.00148	0.00184	6e-05	4.99455	0.09486	35.02	0.66	1.88464
108	0.91463	18468.1	70.3759	515.706	6.1329	77.03	0.9109	0.0793	1.0161	55.6941	0.6512	89.15	1.1	0.28212	0.00493	0.02494	0.00049	3.88202	0.40009	27.28	2.79	10.2273
109	0.91823	1789.62	22.3683	350.873	4.66	8.3387	0.1263	0.0031	0.1261	0.153	0.0232	2.53	0.39	0.0164	0.00069	0.00278	0.0001	4.94269	0.09385	34.66	0.65	1.87536
110	0.91922	2113.38	9.1707	96.4891	1.2902	9.6213	0.134	0.0099	0.2168	6.679	0.1517	93.48	2.16	0.18914	0.00484	0.01603	0.00038	1.42696	0.47466	10.07	3.34	33.1678
111	0.93472	8168.18	31.6259	1511.63	13.2771	23.5806	0.1931	0.0114	0.1126	2.4561	0.0374	8.92	0.14	0.01382	0.00018	0.00102	4e-05	4.89438	0.0486	34.32	0.34	0.990676
112	0.93711	1096.59	30.6955	232.796	6.4719	23.6062	0.7171	0.0012	0.1071	0.8901	0.0496	24.13	1.51	0.00964	0.00089	0.01895	0.00087	3.55144	0.17682	24.97	1.23	4.92591
113	0.93808	1975.56	43.2188	94.5639	2.345	10.6445	0.3208	0.0115	0.3448	6.2191	0.1711	93.11	3.28	0.22245	0.00867	0.01887	0.00089	1.43789	0.70435	10.15	4.96	48.867
114	0.94469	3369.99	13.7898	644.727	14.3075	13.8156	0.3154	0.0202	0.4766	0.4997	0.0324	4.36	0.29	0.0576	0.00186	0.00228	0.00014	4.97095	0.11399	34.85	0.79	2.26686
115	0.95062	3013.7	12.5085	578.416	8.3423	9.1867	0.1628	0.0044	0.1636	0.5034	0.0264	4.95	0.26	0.014	0.00056	0.00111	8e-05	4.92406	0.07585	34.53	0.53	1.5349
116	0.95555	2564.85	10.8819	480.246	6.6944	10.1634	0.1619	0.0205	0.2652	0.5591	0.0337	6.41	0.39	0.07822	0.00149	0.00221	9e-05	4.97066	0.07618	34.85	0.53	1.5208
117	0.96356	4172.17	16.7999	780.933	17.269	14.6382	0.2969	0.0242	0.6144	1.0345	0.0464	7.32	0.33	0.05676	0.00191	0.00169	0.00012	4.92405	0.11301	34.53	0.78	2.25891
118	0.96652	1616.42	28.3467	288.947	5.6336	5.9566	0.1518	0.0022	0.1164	0.694	0.0314	12.74	0.62	0.01404	0.00079	0.00204	0.00014	4.85534	0.14045	34.05	0.98	2.87812
119	0.97369	3547.34	14.4892	698.957	15.9861	30.4087	0.698	0.032	0.7987	0.3018	0.0337	2.45	0.28	0.084	0.00284	0.00693	0.0003	4.92183	0.11601	34.51	0.81	2.34715
120	0.98609	6441	25.2034	1209.11	15.9285	22.6505	0.2999	0.0373	0.5977	1.2511	0.0341	5.72	0.16	0.05654	0.00117	0.0017	7e-05	4.99422	0.06989	35.02	0.49	1.3992
121	1	7712.23	29.9227	1356.56	17.2999	30.0022	0.3734	0.1178	1.3863	2.8195	0.0435	10.73	0.17	0.15941	0.00277	0.00237	8e-05	5.04872	0.06907	35.39	0.48	1.35632
Integrated		631568	335.414	97508	128.846	2756.34	4.8374	4.1414	8.2376	489.13	1.3356	22.94	0.06	0.07793	0.00019	0.00355	1e-05	4.96872	0.00848	34.84	0.09
Black Rapids Gl. detrital biotite
Weighted average of J from standards = 3.817e-03 ｱ 2.004e-05 (1-sigma error)
Days since irradiation = 55
Grain #	Cumulative	40Ar	±	39Ar	±	38Ar	±	37Ar	±	36Ar	±	% Atm.	±	Ca/K	±	Cl/K	±	40Ar*/39ArK	±	Age	±	% uncertainty
	39Ar	mV	mV	mV	mV	mV	mV	mV	mV	mV	mV	40Ar								(Ma)	(Ma)
1	0.00458	252.62	1.3889	50.1796	0.2773	1.4041	0.0255	0.0005	0.07	0.1075	0.0229	12.64	2.69	0.01883	0.00256	0.0036	0.00011	4.37216	0.13962	29.82	0.94	3.15225
2	0.0138	492.513	3.9029	101.016	0.8276	2.2472	0.0189	0.0011	0.0504	0.1805	0.0222	10.88	1.34	0.02067	0.00093	0.00241	6e-05	4.3189	0.08356	29.46	0.57	1.93483
3	0.016	206.623	0.9934	24.1407	0.1192	0.4688	0.0144	0.0006	0.0503	0.4438	0.0181	63.67	2.61	0.04394	0.00383	0.00116	0.00013	3.09906	0.22562	21.19	1.53	7.22039
4	0.02379	414.846	2.4671	85.3494	0.5845	1.4736	0.0193	0.0013	0.0591	0.1453	0.0247	10.39	1.77	0.02692	0.00128	0.00137	5e-05	4.32921	0.09503	29.53	0.64	2.16729
5	0.04014	1378.93	13.319	179.105	1.8224	3.4754	0.0288	0.0024	0.0486	1.9285	0.0287	41.47	0.74	0.02508	0.00056	0.00146	5e-05	4.48865	0.09941	30.61	0.67	2.18883
6	0.0411	2390.18	14.3874	10.5047	0.1178	1.8722	0.0251	0.0026	0.0708	7.9422	0.0542	98.19	0.89	0.4616	0.01341	0.00556	0.00055	4.10932	2.05142	28.04	13.89	49.5364
7	0.06621	1302.51	8.5926	275.096	1.6153	4.6868	0.0485	0.001	0.0755	0.3603	0.0278	8.22	0.64	0.00639	0.00051	0.00133	4e-05	4.31829	0.0502	29.46	0.34	1.15411
8	0.08316	1025.31	9.4631	185.655	1.5703	2.4163	0.0233	0.0009	0.0873	0.5173	0.0359	14.98	1.05	0.00928	0.00087	0.00043	4e-05	4.67004	0.08625	31.84	0.58	1.82161
9	0.08789	261.338	1.5087	51.8484	0.3169	1.045	0.0225	0.0003	0.0718	0.2156	0.0294	24.51	3.35	0.01028	0.00254	0.00188	0.0001	3.78244	0.1718	25.83	1.16	4.4909
10	0.09402	337.236	1.9816	67.2076	0.3929	1.1131	0.0228	0.0004	0.0786	0.2625	0.0273	23.13	2.41	0.01007	0.00215	0.00113	8e-05	3.8343	0.12554	26.18	0.85	3.24675
11	0.09401	-0.2442	0.313	-0.1228	0.0287	0.006	0.0132	-0.0001	0.0881	-0.0246	0.0363	3026.01	5952.95	0.88258	1.33253	-0.0204	0.02571	-57.3211	88.5011	-444.92	779.18	-175.128
12	0.10006	318.156	1.5034	66.2197	0.3033	1.1443	0.0482	0.0011	0.089	0.1165	0.0504	10.86	4.71	0.03047	0.00247	0.00137	0.00016	4.25618	0.22679	29.04	1.53	5.2686
13	0.10798	439.812	2.0504	86.7816	0.383	1.9426	0.0212	0.0001	0.0864	0.163	0.0354	11.01	2.39	0.00211	0.00183	0.00243	6e-05	4.48336	0.12442	30.58	0.84	2.74689
14	0.11328	284.979	1.2039	58.1151	0.2906	1.3758	0.0162	0.001	0.1146	0.0909	0.0405	9.45	4.23	0.03068	0.00362	0.00272	7e-05	4.41342	0.20819	30.1	1.41	4.68439
15	0.11635	219.053	0.7809	33.6236	0.1034	0.5815	0.0126	0.0003	0.076	0.2404	0.0353	32.57	4.78	0.01386	0.00415	0.00116	9e-05	4.37299	0.31102	29.83	2.1	7.03989
16	0.1312	779.391	3.8898	162.709	0.5887	2.9463	0.0366	0.0001	0.0771	0.1546	0.0317	5.9	1.21	0.00163	0.00087	0.00157	5e-05	4.47972	0.06444	30.55	0.44	1.44026
17	0.14425	713.299	5.1386	142.897	1.0432	1.9503	0.0209	0.0003	0.085	0.2291	0.0359	9.55	1.5	0.00387	0.00109	0.00061	4e-05	4.48837	0.08881	30.61	0.6	1.96014
18	0.14997	300.708	1.3055	62.7538	0.3694	1.3121	0.0174	0.0033	0.1266	0.1021	0.0344	10	3.41	0.09564	0.00374	0.00214	7e-05	4.28599	0.16547	29.24	1.12	3.83037
19	0.16856	942.113	6.438	203.613	1.3205	3.6406	0.0418	0.0001	0.0822	0.1782	0.0325	5.62	1.03	0.00103	0.00074	0.00153	5e-05	4.3387	0.06345	29.6	0.43	1.4527
20	0.17615	460.004	4.9245	83.1327	0.9576	1.7316	0.0213	0.0005	0.0817	0.2875	0.0364	18.56	2.36	0.01002	0.00181	0.00205	7e-05	4.48209	0.1515	30.57	1.02	3.3366
21	0.20894	5036.12	3.4696	359.206	5.2481	8.6244	0.1457	0.0047	0.09	11.4927	0.1691	67.57	1	0.02413	0.00058	0.00159	0.0001	4.53713	0.1546	30.94	1.05	3.39367
22	0.22436	813.026	5.6563	168.957	1.1867	2.6399	0.0312	0.0002	0.0653	0.3159	0.0386	11.55	1.41	0.002	0.00071	0.00102	5e-05	4.2299	0.08109	28.86	0.55	1.90575
23	0.23581	614.359	3.5489	125.467	0.7797	2.5965	0.0272	0.0001	0.0575	0.2029	0.0407	9.82	1.97	0.00169	0.00084	0.00209	5e-05	4.38916	0.10362	29.94	0.7	2.33801
24	0.24361	732.101	3.6874	85.4506	0.6203	1.8054	0.0323	0.0012	0.0694	1.1438	0.0728	46.31	2.96	0.0252	0.0015	0.00172	9e-05	4.5837	0.25759	31.25	1.74	5.568
25	0.25374	547.282	2.1402	111.036	0.3987	2.5173	0.0318	0.0001	0.0816	0.1713	0.0419	9.3	2.28	0.00207	0.00135	0.00251	6e-05	4.44335	0.11429	30.31	0.77	2.54042
26	0.26939	851.885	3.5325	171.381	0.7762	3.9221	0.0233	0.0001	0.0591	0.2301	0.0398	8.03	1.39	0.00147	0.00063	0.00256	4e-05	4.5443	0.07453	30.99	0.5	1.61342
27	0.27503	325.018	1.2249	61.8642	0.2121	1.0429	0.0268	0.0001	0.0668	0.1874	0.0369	17.14	3.37	0.00247	0.00198	0.00123	9e-05	4.32881	0.17784	29.53	1.2	4.06366
28	0.28007	291.497	0.9947	55.162	0.2155	1.1113	0.0258	0.0002	0.0586	0.1339	0.0393	13.64	4.01	0.00629	0.00195	0.00194	0.0001	4.53775	0.21197	30.94	1.43	4.62185
29	0.2816	89.9656	0.5189	16.7209	0.0737	0.3214	0.0181	0.0001	0.082	0.0427	0.0425	14.09	14.05	0.00575	0.00899	0.00174	0.00025	4.59659	0.75285	31.34	5.09	16.2412
30	0.28219	1310.91	6.1434	6.5009	0.0378	0.9581	0.023	0.0011	0.0606	4.2919	0.0461	96.75	1.13	0.29861	0.0172	0.00284	0.00079	6.54377	2.29849	44.46	15.42	34.6829
31	0.28416	137.451	0.3414	21.5676	0.1785	1.4342	0.0246	0	0.0828	0.1011	0.0308	21.83	6.66	-0.00409	0.00704	0.01159	0.00027	4.95834	0.42473	33.78	2.87	8.49615
32	0.28621	149.374	0.5438	22.4437	0.0826	1.4076	0.0244	0	0.0752	0.1026	0.0283	20.38	5.62	0.0014	0.00615	0.0108	0.00024	5.2755	0.37377	35.92	2.52	7.01559
33	0.28638	576.77	2.2702	1.9145	0.0334	0.623	0.0162	0.0009	0.1017	1.8879	0.0315	96.72	1.66	0.83905	0.09861	0.02744	0.00196	9.88466	5.00637	66.74	33.18	49.7153
34	0.29249	612.402	3.2846	66.9459	0.3842	2.3336	0.0271	0.0021	0.0849	1.0853	0.0352	52.51	1.73	0.05878	0.00235	0.00449	0.0001	4.3302	0.16481	29.54	1.12	3.79147
35	0.29495	156.79	0.4797	26.9221	0.1063	0.8851	0.0214	0	0.0919	0.1139	0.0314	21.58	5.95	-0.00131	0.00626	0.00455	0.00018	4.54385	0.34577	30.98	2.34	7.55326
36	0.29632	80.0278	0.5043	15.0704	0.0744	0.2014	0.016	0.0001	0.0766	0.0254	0.0423	9.44	15.7	0.01438	0.00933	0.00055	0.00025	4.78226	0.83006	32.6	5.61	17.2086
37	0.30032	227.137	0.7713	43.8265	0.2117	0.6383	0.0159	0.0002	0.0847	0.121	0.0426	15.82	5.57	0.00726	0.00354	0.00076	9e-05	4.33775	0.28834	29.59	1.95	6.59006
38	0.30501	280.135	0.9107	51.3634	0.2633	0.8597	0.0289	0.0002	0.0617	0.173	0.0457	18.34	4.85	0.0081	0.0022	0.00119	0.00012	4.42943	0.26465	30.21	1.79	5.92519
39	0.31331	460.275	1.9906	90.9077	0.3879	1.3565	0.0254	0.0001	0.0568	0.1719	0.0415	11.1	2.68	0.00138	0.00115	0.00087	6e-05	4.47462	0.13813	30.52	0.93	3.04718
40	0.31344	1222.64	5.6032	1.3921	0.021	1.6155	0.0276	0.0015	0.0655	4.1169	0.0575	99.5	1.46	2.02223	0.0917	0.12552	0.00487	4.43342	12.8531	30.24	86.93	287.467
41	0.31913	361.316	1.0757	62.399	0.2183	1.0757	0.0249	0.0002	0.0614	0.2895	0.0402	23.8	3.3	0.00541	0.00181	0.00125	9e-05	4.38995	0.19163	29.94	1.3	4.34202
42	0.32893	642.644	4.2324	107.377	0.6013	1.6217	0.0237	0.0009	0.0637	0.4786	0.0318	22.11	1.48	0.0146	0.00109	0.0008	5e-05	4.63881	0.09958	31.63	0.67	2.11824
43	0.33186	212.526	0.8401	32.0631	0.1479	0.7714	0.021	0.0001	0.0414	0.1988	0.0338	27.76	4.72	0.0057	0.00237	0.00262	0.00015	4.76702	0.31298	32.49	2.11	6.49431
44	0.33621	240.609	1.1115	47.6968	0.18	0.9677	0.0216	0.0001	0.0529	0.0642	0.0333	7.93	4.12	0.00395	0.00204	0.00202	0.0001	4.61705	0.20857	31.48	1.41	4.47903
45	0.35467	999.873	6.5702	202.236	1.3491	3.0934	0.0297	0.0001	0.0485	0.2418	0.032	7.19	0.95	0.00046	0.00044	0.00097	4e-05	4.56114	0.06463	31.1	0.44	1.41479
46	0.3696	4487.55	3.031	163.528	2.0129	10.8552	0.1362	0.005	0.0991	12.278	0.1884	80.93	1.24	0.05596	0.00131	0.0088	0.00023	5.22831	0.34711	35.61	2.34	6.57119
47	0.38028	629.262	3.6724	117.023	0.7549	2.2715	0.0292	0.0003	0.0613	0.3022	0.0377	14.27	1.78	0.00395	0.00096	0.00178	6e-05	4.58461	0.10467	31.26	0.71	2.27127
48	0.3845	219.531	1.1611	46.2092	0.3025	0.7748	0.0169	0.0005	0.0705	0.0877	0.0401	11.86	5.43	0.01957	0.0028	0.00125	9e-05	4.16129	0.25888	28.4	1.75	6.16197
49	0.39528	479.688	2.4955	118.111	0.6887	4.8894	0.0328	0.0012	0.058	0.1506	0.0434	9.33	2.69	0.01814	0.00091	0.00645	8e-05	3.6556	0.11262	24.97	0.76	3.04365
50	0.39994	241.042	1.0094	51.0973	0.1748	0.9706	0.0181	0	0.0596	0.064	0.0392	7.89	4.83	0.00061	0.00214	0.00175	8e-05	4.31754	0.22794	29.45	1.54	5.2292
51	0.41481	821.339	4.3211	162.856	0.8022	2.9066	0.0267	0.0006	0.0689	0.3213	0.0431	11.62	1.56	0.00714	0.00078	0.00148	4e-05	4.43101	0.08538	30.22	0.58	1.91926
52	0.42517	520.681	2.6736	113.509	0.6272	2.0836	0.0332	0	0.0651	0.1362	0.0444	7.78	2.54	0.00043	0.00105	0.00162	7e-05	4.20295	0.12031	28.68	0.81	2.82427
53	0.42713	2464.67	7.8922	21.4871	0.1082	1.9695	0.0249	0.003	0.071	7.941	0.0433	95.22	0.6	0.25813	0.0062	0.00255	0.00026	5.47939	0.70018	37.3	4.72	12.6542
54	0.43008	206.471	0.7536	32.259	0.2331	0.6631	0.0189	0	0.0691	0.2174	0.0384	31.26	5.53	-0.00133	0.00393	0.00186	0.00013	4.37924	0.35433	29.87	2.4	8.03482
55	0.43452	630.128	4.3719	48.7086	0.3645	3.6293	0.0188	0.0017	0.0827	1.1871	0.04	55.78	1.92	0.06292	0.00315	0.0125	0.00014	5.7081	0.2622	38.84	1.76	4.53141
56	0.43748	164.236	0.6478	32.3666	0.1449	0.6532	0.0191	0.0003	0.0777	0.1048	0.038	18.95	6.88	0.01682	0.0044	0.00192	0.00013	4.08876	0.34802	27.91	2.36	8.45575
57	0.44583	484.465	2.1205	91.4934	0.4877	1.5521	0.0224	0.0002	0.0947	0.2995	0.0414	18.36	2.54	0.00496	0.0019	0.00124	6e-05	4.29846	0.13776	29.32	0.93	3.1719
58	0.45374	405.495	2.0202	86.6591	0.4283	1.8392	0.0254	0.0008	0.0785	0.129	0.0374	9.44	2.75	0.01599	0.00166	0.00221	7e-05	4.21041	0.13142	28.73	0.89	3.09781
59	0.45648	943.627	3.7922	30.0859	0.1244	1.0713	0.0254	0.0014	0.0985	2.7518	0.0503	86.24	1.61	0.08577	0.00602	0.0017	0.00019	4.31056	0.50996	29.41	3.45	11.7307
60	0.45651	34.8338	0.4508	0.3014	0.0255	0.0741	0.0192	0	0.0896	0.1508	0.0363	127.93	30.81	0.04669	0.54528	0.02977	0.01443	-32.2687	35.6756	-236.85	279.84	-118.151
61	0.45718	3038.53	2.0228	7.2936	0.0682	6.9384	0.0697	0.0083	0.0951	10.1001	0.0551	98.21	0.54	2.08269	0.03088	0.14334	0.00244	7.46796	2.25322	50.65	15.07	29.7532
62	0.46779	560.974	3.6303	116.322	0.8414	2.6722	0.0258	0.0001	0.0685	0.2095	0.0344	11.1	1.83	0.00138	0.00108	0.00256	6e-05	4.26068	0.09788	29.07	0.66	2.27038
63	0.48433	3260.09	2.1736	181.165	1.1452	5.185	0.0428	0.0015	0.0992	8.1867	0.0416	74.32	0.38	0.01534	0.00101	0.00204	6e-05	4.61271	0.07496	31.45	0.51	1.62162
64	0.5006	801.805	3.9671	178.243	0.9664	2.7642	0.0259	0.0001	0.0806	0.1936	0.0341	7.18	1.27	0.00092	0.00083	0.00102	4e-05	4.1477	0.0649	28.3	0.44	1.55477
65	0.50468	222.063	0.8997	44.6819	0.2105	0.8174	0.018	0.0002	0.0782	0.1544	0.0358	20.67	4.79	0.00872	0.00321	0.00151	9e-05	3.91928	0.23817	26.76	1.61	6.01644
66	0.50607	476.781	1.937	15.2308	0.1039	0.6427	0.0203	0.0015	0.0806	1.5357	0.0477	95.25	2.99	0.18605	0.00979	0.00271	0.00031	1.48676	0.93505	10.2	6.4	62.7451
67	0.51209	451.358	2.3065	65.942	0.3063	1.5687	0.0283	0.0005	0.0847	0.5518	0.0362	36.28	2.39	0.01361	0.00236	0.00248	0.0001	4.3428	0.1673	29.62	1.13	3.81499
68	0.51535	1693.08	8.2251	35.7003	0.1469	2.5458	0.0322	0.0014	0.0811	5.1942	0.0439	90.71	0.88	0.07021	0.00418	0.00707	0.0002	4.40515	0.43057	30.05	2.91	9.68386
69	0.5176	103.978	0.3875	24.6748	0.1179	2.3034	0.0236	0	0.0821	0.0549	0.0415	15.72	11.87	-0.00099	0.0061	0.01732	0.00023	3.52663	0.49738	24.09	3.38	14.0307
70	0.51793	306.531	1.2162	3.5956	0.0395	0.4082	0.0212	0.0007	0.104	1.001	0.0391	96.51	3.79	0.35083	0.05324	0.01072	0.00132	2.97206	3.22845	20.33	21.96	108.018
71	0.52128	209.135	0.8222	36.7927	0.1309	1.2707	0.0193	0.0043	0.0707	0.206	0.0363	29.09	5.16	0.21325	0.00361	0.00484	0.00012	4.01015	0.29317	27.37	1.99	7.27073
72	0.54482	1232.03	3.6923	257.818	0.7898	6.0238	0.0469	0.0006	0.0651	0.2705	0.0365	6.52	0.88	0.00404	0.00046	0.00267	4e-05	4.43914	0.04631	30.28	0.31	1.02378
73	0.54958	270.761	1.1722	52.165	0.2157	1.043	0.0288	0.0003	0.0699	0.1945	0.0424	21.34	4.65	0.00942	0.00246	0.00186	0.00012	4.05928	0.24168	27.71	1.64	5.91844
74	0.56448	3120.2	2.1106	163.209	1.7062	10.2977	0.1332	0.0069	0.0734	8.1284	0.0853	77.08	0.81	0.07806	0.00116	0.0091	0.00021	4.37475	0.16168	29.84	1.09	3.65282
75	0.57067	375.632	2.2805	67.8457	0.5149	0.95	0.0267	0.0002	0.0554	0.209	0.0406	16.53	3.21	0.00608	0.0015	0.00063	9e-05	4.59671	0.18337	31.34	1.24	3.9566
76	0.58489	1984.73	7.8097	155.856	0.6509	18.3118	0.1011	0.0016	0.1007	4.4184	0.0587	65.93	0.91	0.01926	0.00119	0.02137	0.00017	4.32839	0.12336	29.53	0.83	2.8107
77	0.59004	282.337	1.1023	56.3516	0.3012	1.085	0.0236	0.0002	0.0645	0.0913	0.0468	9.6	4.92	0.008	0.0021	0.00179	0.0001	4.50224	0.2472	30.7	1.67	5.43974
78	0.60151	610.327	2.611	125.682	0.6628	2.5219	0.0438	0.0029	0.1007	0.1378	0.0485	6.67	2.36	0.04226	0.00149	0.00198	8e-05	4.50438	0.11839	30.72	0.8	2.60417
79	0.60152	6.1519	0.4292	0.1596	0.0257	0.004	0.0195	0.0153	0.2133	-0.0038	0.0491	-38.73	235.86	188.979	32.834	0.00554	0.03897	57.3322	98.0165	356.6	553.12	155.109
80	0.60415	174.633	0.5712	28.7785	0.067	0.449	0.02	0	0.0824	0.0775	0.0501	13.18	8.52	-0.00249	0.00526	0.00098	0.00016	5.24249	0.51502	35.7	3.47	9.71989
81	0.6106	350.921	1.2674	70.6724	0.233	1.1526	0.0171	0.0001	0.0973	0.083	0.0454	7.03	3.85	0.00359	0.00253	0.00119	6e-05	4.58893	0.19144	31.29	1.29	4.12272
82	0.61354	469.26	1.6037	32.2552	0.1232	0.6075	0.0197	0.0009	0.1115	1.0268	0.052	64.78	3.29	0.05181	0.00635	0.00051	0.00014	5.11382	0.47943	34.83	3.23	9.27361
83	0.61933	330.395	1.416	63.372	0.2754	3.2691	0.0392	0.0013	0.0995	0.2554	0.0511	22.94	4.6	0.03764	0.00289	0.00848	0.00014	3.9948	0.23984	27.27	1.62	5.94059
84	0.63558	878.827	3.5731	178.065	0.892	4.3416	0.046	0.0031	0.113	0.3248	0.0446	10.96	1.51	0.03205	0.00117	0.00286	6e-05	4.36828	0.07979	29.8	0.54	1.81208
85	0.6432	409.058	1.647	83.4381	0.3706	3.3916	0.0293	0	0.0905	0.1655	0.0508	12.02	3.69	0.00107	0.00199	0.00627	9e-05	4.28689	0.18196	29.25	1.23	4.20513
86	0.65819	830.55	3.8725	164.267	0.9147	3.1642	0.0249	0.0003	0.089	0.4237	0.0356	15.16	1.28	0.00343	0.00099	0.00175	4e-05	4.26434	0.07237	29.09	0.49	1.68443
87	0.66728	699.411	3.8437	99.5476	0.4728	1.4304	0.031	0.0008	0.0919	0.8302	0.0501	35.22	2.14	0.01515	0.0017	0.0005	7e-05	4.5324	0.15525	30.91	1.05	3.39696
88	0.66818	1232.03	6.2276	9.8624	0.0325	2.1211	0.0292	0.0015	0.0744	3.9948	0.0508	95.83	1.31	0.28619	0.01388	0.02708	0.00066	5.21328	1.64683	35.5	11.11	31.2958
89	0.67158	207.289	0.7974	37.2696	0.1104	0.7197	0.0194	0	0.107	0.1403	0.0406	20.11	5.81	-0.00217	0.00527	0.00171	0.00012	4.41943	0.32257	30.14	2.18	7.23291
90	0.67901	395.45	1.6575	81.4403	0.3894	1.4388	0.0182	0	0.0857	0.1516	0.0366	11.4	2.75	0.00031	0.00193	0.00144	5e-05	4.27587	0.13581	29.17	0.92	3.15393
91	0.6903	2335.87	11.7682	123.688	0.7753	3.3225	0.0512	0.0036	0.0927	5.9771	0.0638	75.72	0.89	0.05306	0.00141	0.00155	9e-05	4.57816	0.18206	31.22	1.23	3.93978
92	0.70027	591.859	3.9162	109.2	0.7492	2.673	0.0346	0.0003	0.098	0.3398	0.0455	17.06	2.29	0.00535	0.00165	0.00283	8e-05	4.47088	0.13184	30.49	0.89	2.91899
93	0.7075	407.28	2.2996	79.1672	0.3877	2.2562	0.0257	0.0005	0.0873	0.1901	0.0401	13.86	2.93	0.01095	0.00202	0.0037	8e-05	4.40575	0.15408	30.05	1.04	3.4609
94	0.71621	484.006	2.6337	95.4909	0.6026	2.0662	0.0296	0.0002	0.0916	0.2364	0.0386	14.52	2.37	0.00375	0.00176	0.00225	7e-05	4.30749	0.12559	29.39	0.85	2.89214
95	0.71799	747.738	3.4117	19.42	0.1348	2.0273	0.0294	0.0018	0.1061	2.3384	0.0514	92.46	2.08	0.16544	0.0101	0.01501	0.00035	2.90029	0.80241	19.84	5.46	27.5202
96	0.71798	-1.5334	0.5708	-0.0216	0.0259	-0.0049	0.0184	0.0001	0.1001	-0.0147	0.0371	284.41	722.17	-7.68638	12.5159	0.01904	0.19254	-130.704	530.646	-1241.46	7283.06	-586.653
97	0.73856	1244.99	24.0932	225.42	4.3566	7.5515	0.1466	0.0339	0.6147	0.8012	0.0387	18.89	0.99	0.27581	0.00731	0.00471	0.00019	4.45583	0.14667	30.39	0.99	3.25765
98	0.74388	308.608	2.0419	58.3051	0.46	1.0567	0.0159	0.0002	0.1126	0.1728	0.0438	16.64	4.22	0.0065	0.00354	0.0015	7e-05	4.38769	0.22731	29.93	1.54	5.14534
99	0.74718	201.565	0.9381	36.18	0.1712	0.9937	0.0211	0.0002	0.105	0.1543	0.0436	22.73	6.43	0.01051	0.00533	0.00341	0.00013	4.28207	0.35799	29.21	2.42	8.28483
100	0.75235	606.152	3.6175	56.6402	0.3204	1.3267	0.0185	0.0014	0.097	1.1456	0.043	55.98	2.13	0.04397	0.00315	0.00193	8e-05	4.69764	0.2347	32.02	1.59	4.96565
101	0.76438	1348.82	7.9821	131.766	0.7447	2.1071	0.0391	0.0029	0.0895	2.4911	0.0374	54.72	0.88	0.03999	0.00127	0.00042	7e-05	4.62209	0.10675	31.51	0.72	2.28499
102	0.78484	1079.79	6.0282	224.204	1.1631	3.7363	0.0437	0.0002	0.0944	0.3239	0.0405	8.92	1.12	0.00164	0.00077	0.00125	5e-05	4.35963	0.06397	29.74	0.43	1.44586
103	0.78484	3.1655	0.4058	0.0027	0.026	-0.004	0.0133	0	0.0858	0.0214	0.0375	200.19	350.93	5.00659	75.5417	-0.62215	6.05868	-1170.83	11971	-3.29348e+06	23736.6	-0.720714
104	0.79073	316.902	1.4126	64.4501	0.3008	1.7307	0.0261	0.0001	0.095	0.0725	0.0378	6.8	3.55	0.00302	0.00271	0.0034	9e-05	4.55498	0.17599	31.06	1.19	3.83129
105	0.79548	239.507	0.7582	52.1284	0.2363	3.4147	0.0311	0	0.0905	0.158	0.0392	19.63	4.87	-0.00071	0.00319	0.01144	0.00014	3.66889	0.22341	25.06	1.52	6.06544
106	0.80061	290.052	0.7925	56.1772	0.1484	1.2243	0.0298	0.0002	0.0881	0.1653	0.0446	16.93	4.57	0.00587	0.00288	0.00227	0.00012	4.26415	0.23538	29.09	1.59	5.4658
107	0.80868	424.101	1.2881	88.3769	0.3731	1.5021	0.0273	0.0002	0.086	0.1227	0.0404	8.6	2.83	0.00327	0.00179	0.00132	7e-05	4.35888	0.13709	29.73	0.93	3.12815
108	0.84402	1873.83	7.6554	387.212	1.7882	8.9478	0.0393	0.0009	0.0868	0.3229	0.0406	5.12	0.64	0.00415	0.00041	0.00263	3e-05	4.56338	0.04242	31.12	0.29	0.931877
109	0.85814	834.462	5.8568	154.615	1.0616	2.758	0.048	0.0005	0.089	0.4714	0.0375	16.78	1.34	0.00578	0.00106	0.00143	7e-05	4.46667	0.08681	30.46	0.59	1.93697
110	0.865	1232.05	7.1078	75.2354	0.4208	9.6021	0.0997	0.002	0.1103	3.0541	0.0466	73.37	1.2	0.04984	0.0027	0.02302	0.00031	4.35301	0.20748	29.69	1.4	4.71539
111	0.88015	766.817	4.762	165.999	1.0355	2.9589	0.0309	0.002	0.0578	0.1462	0.0377	5.65	1.46	0.02192	0.00065	0.00152	5e-05	4.33047	0.07782	29.54	0.53	1.79418
112	0.8979	7386	4.9689	194.382	1.8641	9.1911	0.0946	0.011	0.1001	22.157	0.2365	88.7	0.95	0.10378	0.00137	0.00326	0.00012	4.2893	0.36283	29.26	2.46	8.40738
113	0.89791	6.1924	0.584	0.1234	0.0291	0.0089	0.018	0	0.0764	0.0295	0.0409	141.04	195.52	-0.26794	1.13712	0.00352	0.03333	-20.5751	98.0266	-147.38	731.69	-496.465
114	0.91861	1078.51	5.756	226.857	1.1766	4.7943	0.0348	0.0006	0.0792	0.2402	0.0375	6.62	1.04	0.00512	0.00064	0.0022	4e-05	4.41178	0.05972	30.09	0.4	1.32935
115	0.92372	299.107	1.2831	55.9251	0.2654	1.102	0.0227	0	0.0633	0.1752	0.0469	17.4	4.66	0.00114	0.00208	0.00182	9e-05	4.39313	0.24972	29.97	1.69	5.63897
116	0.95118	1417.04	9.6587	300.853	2.0979	5.4301	0.0367	0.0002	0.0674	0.3094	0.0365	6.49	0.77	0.00131	0.00041	0.00156	4e-05	4.37657	0.05709	29.85	0.39	1.30653
117	0.96352	631.917	3.971	135.144	0.8694	3.1557	0.0364	0	0.0723	0.1019	0.0412	4.8	1.94	-0.00012	0.00098	0.00268	7e-05	4.42325	0.09897	30.17	0.67	2.22075
118	0.96654	831.922	5.0219	33.1112	0.2161	7.6026	0.0406	0.0011	0.0718	2.4601	0.0372	87.48	1.43	0.0601	0.004	0.04311	0.00039	3.14324	0.3657	21.49	2.49	11.5868
119	0.96867	1537.8	6.2976	23.3543	0.14	3.559	0.0419	0.0032	0.0764	4.9018	0.0513	94.22	1.06	0.25534	0.00619	0.02157	0.00041	3.80744	0.70356	26	4.77	18.3462
120	0.99234	1342.71	8.8475	259.289	1.9536	6.1185	0.0622	0.0004	0.0711	0.6962	0.0408	15.41	0.91	0.00258	0.0005	0.00266	6e-05	4.3554	0.06648	29.71	0.45	1.51464
121	1	443.753	2.5713	83.9563	0.5869	1.0952	0.0236	0.0003	0.0913	0.2032	0.0456	13.61	3.06	0.00666	0.002	0.00045	7e-05	4.54077	0.1666	30.96	1.13	3.64987
Integrated		97519.8	52.686	10955.7	10.4024	310.205	0.4528	0.1695	1.108	165.42	0.571	50.28	0.18	0.02839	0.00019	0.00316	1e-05	4.41114	0.01668	30.09	0.19
20% uncertainty filter
parsed data in red

## Sheet:  This study- U-Pb bedrock
This study- U-Pb bedrock
	Location	(WGS84)	Elv. (m)
Sample Name	Lat (°N)	Long (°W)		Rock type	Zircon U-Pb Age (Ma)	Uncertainty (Ma)	MSWD	Nage=	Ntotal=	North or south of Denali Fault
Pyramid	63.6425	148.503	1341.65	granitoid	38.2	0.09	2.06	25	35	north
20RAP	63.4276	146.445	2276	granitoid	33.52	0.12	1.79	26	35	south

## Sheet: This study--Pyramid U-Pb
This study--Pyramid U-Pb
U-Pb isotope data
							Isotope ratios						Apparent ages (Ma)
Analysis	U	206Pb	U/Th	206Pb*	±	207Pb*	±	206Pb*	±	error	206Pb*	±	207Pb*	±	206Pb*	±	Best age	±	Conc
	(ppm)	204Pb		207Pb*	(%)	235U*	(%)	238U	(%)	corr.	238U*	(Ma)	235U	(Ma)	207Pb*	(Ma)	(Ma)	(Ma)	(%)
PYRAMID: Pyramid Pluton, lat: 63.642481, long: -148.502704
PYRAMID Spot 35	375.242	1478.13	4.74524	25.5141	1.86401	0.0312098	2.3782	0.00577776	1.47692	0.621023	37.1386	0.54693	31.2054	0.73084	NA	NA	37.1386	0.54693	NA
PYRAMID Spot 20	287.332	4466.19	3.64731	24.5347	2.22	0.0324807	2.76482	0.00578221	1.64797	0.596052	37.1672	0.610743	32.4561	0.883161	NA	NA	37.1672	0.610743	NA
PYRAMID Spot 17	895.043	8892.52	1.24413	21.8294	1.72105	0.0365944	2.14159	0.00579622	1.27451	0.595125	37.257	0.473475	36.4936	0.767667	NA	NA	37.257	0.473475	NA
PYRAMID Spot 4	385.67	2222.11	3.56477	24.9219	1.95092	0.0322686	2.26148	0.0058351	1.14377	0.505763	37.5061	0.42774	32.2474	0.717811	NA	NA	37.5061	0.42774	NA
PYRAMID Spot 12	715.555	5790.75	3.56706	21.8064	1.46623	0.0371383	1.88028	0.00587618	1.17712	0.626036	37.7694	0.443293	37.0262	0.683657	NA	NA	37.7694	0.443293	NA
PYRAMID Spot 7	666.512	13149.5	2.79132	22.4068	1.56578	0.0363014	1.82876	0.0059019	0.944831	0.51665	37.9342	0.357362	36.2066	0.650467	NA	NA	37.9342	0.357362	NA
PYRAMID Spot 5	232.409	1229.54	6.40794	27.2186	2.32335	0.0298921	2.65981	0.00590351	1.29484	0.486819	37.9446	0.489879	29.9072	0.783872	NA	NA	37.9446	0.489879	NA
PYRAMID Spot 34	842.717	30598.8	2.70821	20.9009	1.705	0.0389309	2.09829	0.00590402	1.22302	0.582868	37.9479	0.462748	38.7797	0.798367	90.5449	40.4221	37.9479	0.462748	NA
PYRAMID Spot 19	583.38	113666	3.4809	21.3179	1.57207	0.038212	1.90959	0.0059106	1.08404	0.567681	37.99	0.410616	38.0768	0.713648	43.5563	37.5643	37.99	0.410616	NA
PYRAMID Spot 16	1935.75	17159.5	4.64179	21.6391	1.19565	0.0376953	1.80739	0.00591853	1.35538	0.749913	38.0408	0.51408	37.5714	0.66665	7.70254	28.7556	38.0408	0.51408	NA
PYRAMID Spot 21	683.109	48372.5	3.59261	20.7578	1.52348	0.0393163	2.04447	0.00592165	1.3634	0.666871	38.0608	0.517391	39.1563	0.785298	106.844	35.9911	38.0608	0.517391	NA
PYRAMID Spot 32	348.824	2465.08	6.29322	24.8458	4.56281	0.0329349	4.79603	0.0059374	1.47738	0.308043	38.1618	0.562129	32.9026	1.55273	NA	NA	38.1618	0.562129	NA
PYRAMID Spot 29	471.987	11514.7	3.45336	21.723	2.30672	0.037724	2.53914	0.00594601	1.06124	0.417955	38.2169	0.404376	37.5995	0.937242	NA	NA	38.2169	0.404376	NA
PYRAMID Spot 6	557.888	3993.32	3.35196	23.2858	3.17256	0.035408	3.39975	0.00598245	1.22197	0.359429	38.4505	0.468455	35.3308	1.1805	NA	NA	38.4505	0.468455	NA
PYRAMID Spot 9	386.042	3515.47	8.503	23.6039	2.07765	0.0349448	2.445	0.00598485	1.28896	0.52718	38.4659	0.494332	34.8765	0.838252	NA	NA	38.4659	0.494332	NA
PYRAMID Spot 11	507.541	4064.27	4.0276	23.5137	3.52195	0.0352637	3.68946	0.0060164	1.09909	0.297899	38.668	0.423723	35.1893	1.27606	NA	NA	38.668	0.423723	NA
PYRAMID Spot 30	216.148	3022.73	6.75058	22.878	5.53775	0.0363051	5.74772	0.00602662	1.53935	0.267819	38.7335	0.594455	36.2102	2.04459	NA	NA	38.7335	0.594455	NA
PYRAMID Spot 3	204.045	1600.69	4.90021	25.9364	4.46705	0.0320353	4.65095	0.00602875	1.29491	0.278419	38.7471	0.500237	32.018	1.46591	NA	NA	38.7471	0.500237	NA
PYRAMID Spot 23	499.617	5225.22	4.92433	24.0916	1.75839	0.0344918	2.05711	0.00602934	1.06761	0.518985	38.7509	0.412468	34.432	0.69643	NA	NA	38.7509	0.412468	NA
PYRAMID Spot 25	752.698	44235.5	7.20244	21.0971	1.49482	0.0394107	2.07315	0.00603287	1.43647	0.692893	38.7735	0.555299	39.2485	0.798155	68.3874	35.5646	38.7735	0.555299	NA
PYRAMID Spot 18	719.806	33948.7	2.94265	21.2751	1.51141	0.0391444	1.82559	0.00604267	1.02392	0.560873	38.8363	0.396459	38.9884	0.698276	48.3338	36.0817	38.8363	0.396459	NA
PYRAMID Spot 26	347.811	3046.67	4.71826	24.3213	4.78269	0.0343707	5.09346	0.00606544	1.75193	0.343957	38.9822	0.680882	34.3131	1.71852	NA	NA	38.9822	0.680882	NA
PYRAMID Spot 1	396.871	6615.25	4.68815	22.0932	2.79372	0.0378748	2.98283	0.0060715	1.04518	0.350399	39.0211	0.406609	37.747	1.10526	NA	NA	39.0211	0.406609	NA
PYRAMID Spot 14	3295.74	73108	1.79994	20.9921	0.738891	0.039877	1.4472	0.00607388	1.24436	0.859839	39.0363	0.484285	39.704	0.563508	80.2218	17.5493	39.0363	0.484285	NA
PYRAMID Spot 24	711.859	11590.3	4.90084	20.6927	1.5364	0.0405351	1.85728	0.00608604	1.04354	0.561863	39.1142	0.406936	40.3463	0.734653	114.237	36.2724	39.1142	0.406936	NA
PYRAMID Spot 28	2398.21	62906.4	3.90336	18.251	1.69404	0.0464183	2.04785	0.00614701	1.15061	0.561862	39.5049	0.453156	46.0712	0.922383	402.729	37.9405	39.5049	0.453156	NA
PYRAMID Spot 27	253.979	2964.12	5.90783	22.1807	3.10645	0.0382165	3.40225	0.00615054	1.38756	0.407836	39.5275	0.54679	38.0812	1.27163	NA	NA	39.5275	0.54679	NA
PYRAMID Spot 33	578.632	16368.8	3.0687	21.1749	1.85285	0.0401101	2.19394	0.00616259	1.17487	0.535505	39.6047	0.463876	39.9316	0.859072	59.642	44.1607	39.6047	0.463876	NA
PYRAMID Spot 31	2188.63	72532.2	7.05556	21.8016	0.760228	0.039064	1.46321	0.0061795	1.25022	0.854433	39.713	0.494973	38.9098	0.558563	NA	NA	39.713	0.494973	NA
PYRAMID Spot 15	3700.88	130939	6.82418	20.9618	1.07975	0.0406608	1.60744	0.00618433	1.1908	0.740804	39.744	0.471814	40.469	0.637722	83.6499	25.6433	39.744	0.471814	NA
PYRAMID Spot 10	504.571	49690.6	4.14522	18.407	2.26433	0.0467042	2.53566	0.00623772	1.14121	0.450066	40.086	0.456048	46.3485	1.14882	383.641	50.8717	40.086	0.456048	NA
PYRAMID Spot 8	151.483	5409.75	2.93252	21.2351	3.93604	0.0404878	4.31162	0.00623829	1.76001	0.408201	40.0897	0.703393	40.3002	1.70356	52.8619	93.9505	40.0897	0.703393	NA
PYRAMID Spot 2	1681.87	13139.7	3.60641	21.7769	0.862335	0.0396831	1.3942	0.00627032	1.09552	0.785771	40.2949	0.440061	39.5146	0.540329	NA	NA	40.2949	0.440061	NA
PYRAMID Spot 22	428.144	24352.3	5.90827	21.8015	1.71136	0.0418562	2.0998	0.00662116	1.21673	0.579447	42.542	0.515915	41.6347	0.856567	NA	NA	42.542	0.515915	NA
PYRAMID Spot 13	162.539	5433.92	2.77701	22.3238	3.79067	0.0433456	4.03669	0.00702104	1.38769	0.343768	45.1024	0.623695	43.0853	1.70284	NA	NA	45.1024	0.623695	NA

## Sheet: This study--20RAP
This study--20RAP U-Pb
spot name	serial	Mode	177 cps	204 cps	206 cps	207 cps	208 cps	232 cps	235 cps	238 cps	206/238	68 ± %	slope	206/207	67 ± %	206/204	64 ± %	208/232	82 ± %	208/204	84 ± %	6/8 age	± (Ma)	6/7 age	± (Ma)	8/2 age	± (Ma)	68 STDS	67 STDS	Unknowns	7/5 ratio	±(%)	6/8 ratio	±(%)	errcorr	6/8 age	±(Ma)	6/7 age	±(Ma)	BEST AGE	±(Ma)	8/2 age	±(Ma)	sample	U (ppm)	Th(ppm)	6/4c	8/4 ratio	U/Th
20RAP Spot 1	9	IC	0	57.6126	12030.2	624.681	199.614	40225.7	15538.7	2.136e+06	0.00563392	2.24673	0.0253158	19.2963	3.55565	835.25	35.2801	0.00496236	20	100	0.472936	35.1184	0.472122	NA	NA	43.036	8.59898				0.0345786	5.08349	0.0054626	1.34804	0.26518	35.1184	0.472122	NA	NA	35.1184	0.472122	43.036	8.59898	20RAP Spot 1	222.68	7.83469	2505.75	100	28.4224
20RAP Spot 10	20	AN	0	75.9647	161829	7609.97	9973.92	2.90079e+06	263851	3.63146e+07	0.00451684	2.36076	0.0213263	21.242	1.16346	8521.29	19.7457	0.00343835	4.08391	131.297	50	28.6061	0.404294	18.6247	NA	30.9895	3.98083				0.0284544	1.84449	0.00444738	1.41645	0.767937	28.6061	0.404294	18.6247	NA	28.6061	0.404294	30.9895	3.98083	20RAP Spot 10	3785.84	564.981	25563.9	131.297	6.70083
20RAP Spot 11	23	IC	0	34.0632	1844.25	146.008	399.364	94233.6	2723.86	363667	0.00512777	5.27166	0.0540637	12.2809	7.06204	216.568	65.3695	0.00423802	20	100	4.86951	31.5298	0.994851	563.399	368.909	36.8937	7.44573			low 6/4														20RAP Spot 11	37.9128	18.3537	649.704	100	2.06567
20RAP Spot 12	24	IC	0	15.258	2036.6	138.836	350.886	98387	2894.67	384972	0.00531584	4.21338	0.0447953	14.2898	7.13778	533.909	10.2388	0.00356638	20	100	4.00954	33.2534	0.838491	631.806	156.826	31.0515	6.24879			low 6/4														20RAP Spot 12	40.1338	19.1627	1601.73	100	2.09438
20RAP Spot 13	25	IC	0	41.7895	4443.97	375.401	979.35	120173	6093.79	826013	0.00538583	3.49192	0.0376138	11.9186	7.56833	425.367	4.07609	0.00814949	20	100	2.42489	33.5976	0.70209	1000.46	154.383	70.8905	14.1912			low 6/4														20RAP Spot 13	86.1129	23.4059	1276.1	100	3.67911
20RAP Spot 14	26	MI	0	57.3022	29941.3	1484.47	110.271	21264.2	35818.3	4.97529e+06	0.00615601	3.35155	0.0412644	20.3989	2.00181	2090.06	10.1365	0.00518577	20	100	5.56691	38.8825	0.779548	26.1802	NA	45.1402	9.13314				0.0388295	2.87552	0.00604988	2.01093	0.699327	38.8825	0.779548	26.1802	NA	38.8825	0.779548	45.1402	9.13314	20RAP Spot 14	518.68	4.1416	6270.18	100	125.237
20RAP Spot 15	27	IC	0	21.5368	1924.61	130.161	454.886	85216.5	2732.43	367954	0.00520165	4.52979	0.0471247	14.6832	7.46295	357.454	10.3807	0.005338	20	100	8.1595	32.4268	0.879106	385.061	176.343	46.4343	9.51084			low 6/4														20RAP Spot 15	38.3597	16.5975	1072.36	100	2.31117
20RAP Spot 16	30	IC	0	16.8316	14298.5	775.034	2781.2	162385	4402.93	606783	0.0238246	2.65534	0.126525	18.7731	2.88485	3398.03	9.54435	0.0171272	9.55066	165.237	48.4628	149.266	2.35079	273.096	66.364	157.315	20.5496				0.167052	3.30445	0.023425	1.5932	0.482139	149.266	2.35079	273.096	66.364	149.266	2.35079	157.315	20.5496	20RAP Spot 16	63.2578	31.6274	10194.1	165.237	2.0001
20RAP Spot 17	31	IC	0	48.0602	4441.79	257.621	300.971	71870	5920.44	806748	0.00551871	3.11326	0.0343623	16.7866	4.13146	369.685	14.1386	0.00418772	20	100	6.73599	34.4411	0.641628	4.65833	NA	36.4378	7.41224			low 6/4														20RAP Spot 17	84.1045	13.998	1109.06	100	6.00832
20RAP Spot 18	32	IC	0	6.20143	3579.75	196.701	203.157	54015.8	4833.84	663288	0.00534325	2.96928	0.0317313	19.0266	4.89799	2308.98	3.54849	0.00376107	20	100	15.1867	33.8307	0.601139	210.227	113.636	32.7282	7.00269				0.0365136	5.21395	0.00526178	1.78157	0.341693	33.8307	0.601139	210.227	113.636	33.8307	0.601139	32.7282	7.00269	20RAP Spot 18	69.1486	10.5206	6926.95	100	6.57271
20RAP Spot 19	33	IC	0	2.43064	1870.96	125.982	241.921	73457.5	2552.5	344407	0.00544191	3.48913	0.0379751	14.8435	7.24374	3078.96	1.20208	0.00329335	20	100	6.22535	34.4634	0.719559	796.888	152.022	28.6539	5.81634				0.0485606	7.54024	0.00536046	2.09348	0.277641	34.4634	0.719559	796.888	152.022	34.4634	0.719559	28.6539	5.81634	20RAP Spot 19	35.9049	14.3072	9236.88	100	2.50957
20RAP Spot 2	10	IC	0	80.0855	20450.4	1117.26	934.343	139146	21478.8	2.98076e+06	0.00724043	2.72503	0.0394607	18.8434	2.80029	1021.43	100	0.00671482	20	100	15.8548	45.1263	0.735246	111.397	NA	58.2166	12.5035				0.0467307	5.96368	0.00702477	1.63502	0.274162	45.1263	0.735246	111.397	NA	45.1263	0.735246	58.2166	12.5035	20RAP Spot 2	310.748	27.1013	3064.28	100	11.4662
20RAP Spot 20	34	IC	0	19.8666	3367.71	188.121	282.85	45709	4626.55	635022	0.00530592	4.45334	0.0472581	17.4048	5.75172	678.062	11.266	0.00618805	20	100	15.926	33.3995	0.890128	201.403	137.939	53.8055	11.5643				0.0359101	6.51051	0.00519454	2.672	0.410414	33.3995	0.890128	201.403	137.939	33.3995	0.890128	53.8055	11.5643	20RAP Spot 20	66.2018	8.90267	2034.19	100	7.43618
20RAP Spot 21	38	IC	0	61.2666	3123.83	221.598	383.436	73322.9	4298.92	584148	0.00533213	2.88159	0.03073	13.2454	4.97246	203.95	8.29675	0.00522941	20	100	2.41759	32.8452	0.566435	259.181	142.205	45.6491	9.14384			low 6/4														20RAP Spot 21	60.8981	14.281	611.85	100	4.26428
20RAP Spot 22	39	IC	0	36.7215	3245.07	194.941	264.1	48264.9	4565.11	612724	0.0053055	3.78481	0.0401607	16.5968	5.22731	353.479	40.8008	0.00547189	20	100	20.5654	33.1198	0.750185	10.1759	NA	47.7631	10.6006			low 6/4														20RAP Spot 22	63.8773	9.40047	1060.44	100	6.79511
20RAP Spot 23	40	IC	0	110.736	4968.61	288.896	288.387	88073.9	6960.47	948886	0.00525653	2.89385	0.0304232	17.2897	3.90164	179.476	0.164042	0.00327438	20	100	0.0364931	32.2464	0.5585	NA	NA	28.595	5.71496			low 6/4														20RAP Spot 23	98.9225	17.154	538.429	100	5.76673
20RAP Spot 24	41	IC	0	39.0916	3250.22	197.386	529.771	122041	4543.86	614773	0.00534396	3.10116	0.033145	17.1095	5.8298	332.575	100	0.00434091	20	100	50	33.336	0.618681	NA	NA	37.8371	10.0014			low 6/4														20RAP Spot 24	64.0909	23.7698	997.725	100	2.69632
20RAP Spot 25	42	IC	0	15.652	3272.83	203.943	306.514	77820.2	4468.47	621990	0.00526714	2.79944	0.02949	16.7499	5.03071	836.398	31.2844	0.00393875	20	100	18.0116	33.2404	0.55689	363.069	127.775	34.3617	7.49527				0.0383557	5.90604	0.00516974	1.67966	0.284397	33.2404	0.55689	363.069	127.775	33.2404	0.55689	34.3617	7.49527	20RAP Spot 25	64.8432	15.1569	2509.19	100	4.27813
20RAP Spot 26	45	IC	0	21.6991	3852.11	201.38	344.571	66994.7	5211.38	713211	0.00536583	3.22693	0.0346304	18.3025	5.14749	710.096	64.2494	0.00514326	20	100	20.8357	33.8799	0.654249	83.7331	NA	44.8903	9.98231				0.0346469	7.93155	0.00526946	1.93616	0.244109	33.8799	0.654249	83.7331	NA	33.8799	0.654249	44.8903	9.98231	20RAP Spot 26	74.3531	13.0485	2130.29	100	5.69823
20RAP Spot 27	46	IC	0	31.4455	24604.4	1566.01	8271.6	115130	1621.39	216577	0.113552	3.05688	0.694226	15.6797	1.8925	3129.78	72.5922	0.0718459	5.96902	263.045	50	684.16	11.9055	681.537	46.1296	674.953	52.6649				0.960496	2.83322	0.111967	1.83413	0.647366	684.16	11.9055	681.537	46.1296	684.16	11.9055	674.953	52.6649	20RAP Spot 27	22.5785	22.4236	9389.35	263.045	1.00691
20RAP Spot 28	47	AN	0	72.4559	56157.9	2649.61	5836.21	1.78846e+06	78872.9	1.08539e+07	0.0051082	3.223	0.0329274	21.0249	1.57885	3100.25	4.93012	0.00326327	6.37238	100	14.011	32.4749	0.62642	NA	NA	28.4929	2.73134				0.032	2.50178	0.00505039	1.9338	0.772969	32.4749	0.62642	NA	NA	32.4749	0.62642	28.4929	2.73134	20RAP Spot 28	1131.53	348.335	9300.75	100	3.2484
20RAP Spot 29	48	IC	0	62.6015	3087.67	182.012	238.493	42139.5	4219.96	588739	0.00524583	2.77725	0.0291379	17.4295	5.77279	197.29	31.4965	0.0056596	20	100	3.30261	32.3697	0.53804	NA	NA	49.3911	9.91389			low 6/4														20RAP Spot 29	61.3768	8.20744	591.871	100	7.4782
20RAP Spot 3	11	MI	0	95.1739	25122.7	1193.96	194.814	49295.5	28430.5	3.88738e+06	0.00645082	2.98358	0.0384931	20.9714	2.56407	1055.87	4.10231	0.00395197	20	100	0.091553	40.2876	0.718959	NA	NA	34.2691	6.84804				0.0371892	3.1569	0.00626918	1.79015	0.567061	40.2876	0.718959	NA	NA	40.2876	0.718959	34.2691	6.84804	20RAP Spot 3	405.264	9.6012	3167.6	100	42.2097
20RAP Spot 30	49	IC	0	57.7402	2748.37	163.188	291.879	68320.5	3818.98	521104	0.00530762	3.50769	0.0372349	17.4764	4.53816	190.396	18.9222	0.00427219	20	100	8.41471	32.7706	0.687944	NA	NA	37.3076	7.65356			low 6/4														20RAP Spot 30	54.3258	13.3067	571.187	100	4.08259
20RAP Spot 31	52	MI	0	17.0132	22193.9	1091.68	6777.89	2.04436e+06	30161.4	4.23129e+06	0.00523941	2.30294	0.0241321	20.0141	2.15495	5218.02	7.2361	0.00331542	4.31863	398.389	33.068	33.4144	0.460514	150.625	50.5879	32.2822	1.6254				0.0351522	2.56319	0.00519687	1.38177	0.539081	33.4144	0.460514	150.625	50.5879	33.4144	0.460514	32.2822	1.6254	20RAP Spot 31	441.117	398.176	15654.1	398.389	1.10785
20RAP Spot 32	53	IC	0	7.98227	9839.51	508.702	1224.24	337355	13417.2	1.86662e+06	0.00530178	2.29914	0.024379	19.1827	3.94494	4930.69	9.36374	0.00362894	12.3886	153.37	43.2831	33.8345	0.465519	248.605	90.9169	33.4504	5.16159				0.0371298	4.1825	0.00526237	1.37948	0.329823	33.8345	0.465519	248.605	90.9169	33.8345	0.465519	33.4504	5.16159	20RAP Spot 32	194.598	65.7062	14792.1	153.37	2.96164
20RAP Spot 33	54	IC	0	70.9026	5419.48	271.892	214.236	51297.8	7405.8	1.0099e+06	0.00544433	2.55281	0.0277967	20.6268	4.20796	305.742	68.1348	0.00417632	20	100	7.64602	34.0889	0.520757	NA	NA	36.6122	7.48091			low 6/4														20RAP Spot 33	105.283	9.99118	917.227	100	10.5376
20RAP Spot 34	55	IC	0	3.58313	4128.68	236.691	144.193	20482.8	5424.29	768022	0.0054286	3.70996	0.0402798	17.3941	5.45615	4609.02	1.63438	0.00703971	20	100	17.014	34.65	0.769231	471.093	120.83	61.6762	13.3521				0.041967	5.89283	0.00538955	2.22598	0.377744	34.65	0.769231	471.093	120.83	34.65	0.769231	61.6762	13.3521	20RAP Spot 34	80.0673	3.98939	13827.1	100	20.07
20RAP Spot 35	56	AN	0	64.0907	42128.5	2007.02	457.65	176929	58358.6	8.0141e+06	0.00528219	2.46918	0.0260854	19.8439	1.6374	2629.31	7.60249	0.00258663	20	100	2.87188	33.6931	0.497864	128.879	39.0474	22.7021	4.55471				0.0351194	2.22496	0.00524033	1.48151	0.665858	33.6931	0.497864	128.879	39.0474	33.6931	0.497864	22.7021	4.55471	20RAP Spot 35	835.48	34.4602	7887.92	100	24.2448
20RAP Spot 4	12	IC	0	43.1035	2566.63	161.6	135.864	42418.4	3474.54	483055	0.00536001	3.83451	0.041106	16.7864	5.3408	238.183	4.02468	0.00320296	20	100	1.49002	32.853	0.753928	NA	NA	27.7772	5.55743			low 6/4														20RAP Spot 4	50.3591	8.26176	714.549	100	6.09545
20RAP Spot 5	13	AN	0	59.1562	320471	15604.3	44254.4	4.32645e+06	186396	2.51789e+07	0.0128457	3.07404	0.0789765	20.5678	0.830726	21669.5	45.9324	0.0102288	3.26594	748.094	50	80.377	1.47329	120.097	19.9004	99.8793	3.70424				0.0837724	2.02825	0.0125465	1.84443	0.909369	80.377	1.47329	120.097	19.9004	80.377	1.47329	99.8793	3.70424	20RAP Spot 5	2624.93	842.655	65008.4	748.094	3.11507
20RAP Spot 6	16	IC	0	73.8959	5915.23	350.887	175.35	57374.4	7406.24	1.03793e+06	0.00581807	2.6783	0.0311651	17.0009	3.91439	320.192	20.9244	0.00305624	20	100	3.9131	36.0488	0.577679	NA	NA	26.5318	5.33818			low 6/4														20RAP Spot 6	108.206	11.1747	960.577	100	9.68306
20RAP Spot 7	17	IC	0	10.4852	3547.97	185.535	280.057	68140.4	4919.88	677098	0.00521736	4.08759	0.0426529	18.8444	5.57609	1353.51	10.4428	0.00411	20	100	23.1086	32.8302	0.803133	166.011	131.404	35.6707	8.05922				0.0347646	6.13137	0.00510578	2.45255	0.400001	32.8302	0.803133	166.011	131.404	32.8302	0.803133	35.6707	8.05922	20RAP Spot 7	70.5883	13.2716	4060.54	100	5.31876
20RAP Spot 8	18	IC	0	14.0262	4612.16	248.158	244.007	47282.7	6332.67	872938	0.00535721	3.45416	0.0370093	19.1649	5.33635	1315.3	5.33739	0.0051606	20	100	4.38793	33.7398	0.697429	116.17	NA	44.8878	9.04155				0.0349791	5.73814	0.00524761	2.07249	0.361179	33.7398	0.697429	116.17	NA	33.7398	0.697429	44.8878	9.04155	20RAP Spot 8	91.0049	9.20918	3945.91	100	9.88197
20RAP Spot 9	19	IC	0	21.6442	2419.04	149.479	253.029	64354.7	3059.38	426670	0.00566572	3.52385	0.0399303	15.7497	7.42676	447.057	17.7033	0.00393178	20	100	11.1249	35.3469	0.7453	304.758	184.288	34.2308	7.13358			low 6/4														20RAP Spot 9	44.4809	12.5343	1341.17	100	3.54874
[truncated: 19 more columns]

## Sheet: This study-- Nenana gl dz
This study--Nenana Gl. dZ
Modern River Sediment		Location	(WGS84)	Elv. (m)
Sample Name		Lat (°N)	Long (°W)		Rock Type
Nenana Gl.		63.4908	147.804	959	Sand
							Isotope ratios
Analysis	U	206Pb	U/Th	206Pb*	±	207Pb*	±	206Pb*	±	error	206Pb*	±	207Pb*	±	206Pb*	±	Best age	±	Conc	% Uncertainty
	(ppm)	204Pb		207Pb*	(%)	235U*	(%)	238U	(%)	corr.	238U*	(Ma)	235U	(Ma)	207Pb*	(Ma)	(Ma)	(Ma)	(%)
-Regan#8 Nenana Glacier Spot 37	3875.12	100998	0.940545	19.7978	0.81872	0.0405268	1.36837	0.005848	1.45624	0.871163	37.5889	0.54579	38.1717	0.626232	74.9525	19.5132	37.5889	0.54579	NA	1.452
-Regan#8 Nenana Glacier Spot 45	4098.09	82532.2	1.1417	21.0388	0.820745	0.0383089	1.6716	0.00585084	1.10304	0.774524	37.607	0.413613	37.4007	0.522953	24.1799	21.615	37.607	0.413613	NA	1.09983
-Regan#8 Nenana Glacier Spot 93	2945.61	74956.9	4.2887	21.491	0.900841	0.0375209	1.42415	0.00587401	1.03258	0.754871	37.7555	0.388715	38.7569	0.52016	101.19	21.2186	37.7555	0.388715	NA	1.02956
-Regan#8 Nenana Glacier Spot 44	2871.61	76773.1	1.79439	20.8072	0.897159	0.0389075	1.36789	0.00591428	0.945223	0.550063	38.0136	0.358256	37.839	0.638255	26.7531	34.3949	38.0136	0.358256	NA	0.942441
-Regan#8 Nenana Glacier Spot 15	1029.09	290247	3.1483	21.4678	1.43507	0.0379688	1.71839	0.00596963	1.11076	0.701688	38.3683	0.424916	37.6866	0.585639	NA	NA	38.3683	0.424916	NA	1.10747
-Regan#8 Nenana Glacier Spot 4	1195.24	9715.8	2.94413	21.758	1.12785	0.037813	1.58299	0.00599185	1.08417	0.78332	38.5107	0.416277	38.1321	0.517987	14.3743	20.6588	38.5107	0.416277	NA	1.08094
-Regan#8 Nenana Glacier Spot 89	2338.14	47819.8	1.39448	21.5791	0.860363	0.0382684	1.38407	0.00600088	1.15495	0.826419	38.5686	0.444119	38.3152	0.525493	22.4686	18.8868	38.5686	0.444119	NA	1.15151
-Regan#8 Nenana Glacier Spot 28	4102.97	25347.4	2.40083	21.5064	0.786895	0.0384557	1.39754	0.00600565	1.54839	0.807825	38.5991	0.59588	38.8349	0.73031	53.4539	26.9599	38.5991	0.59588	NA	1.54377
-Regan#8 Nenana Glacier Spot 84	1117.75	57576.8	2.98195	21.2299	1.12977	0.0389874	1.91674	0.00600591	1.32909	0.593747	38.6008	0.511508	36.9585	0.812434	NA	NA	38.6008	0.511508	NA	1.32512
-Regan#8 Nenana Glacier Spot 87	636.8	5567.13	1.24864	22.3295	1.8012	0.0370691	2.23849	0.00600824	1.1827	0.676242	38.6157	0.455343	38.2302	0.65619	14.0757	30.9509	38.6157	0.455343	NA	1.17917
-Regan#8 Nenana Glacier Spot 36	1170.34	10223.4	4.86729	21.5815	1.2884	0.0383688	1.74893	0.0060163	1.23884	0.551873	38.6674	0.477593	36.3855	0.802317	NA	NA	38.6674	0.477593	NA	1.23513
-Regan#8 Nenana Glacier Spot 59	747.762	7208.8	3.7498	22.7269	1.87199	0.036484	2.24479	0.00602468	1.56982	0.607065	38.721	0.606029	32.7362	0.833031	NA	NA	38.721	0.606029	NA	1.56511
-Regan#8 Nenana Glacier Spot 40	321.889	2437.4	3.78122	25.3412	2.05491	0.0327656	2.58592	0.00602469	1.10241	0.561569	38.7211	0.425585	37.2018	0.717086	NA	NA	38.7211	0.425585	NA	1.0991
-Regan#8 Nenana Glacier Spot 50	590.426	65788.6	4.38016	22.2502	1.62432	0.0373176	1.96308	0.00603579	1.63451	0.507834	38.7923	0.632159	36.3313	1.14868	NA	NA	38.7923	0.632159	NA	1.6296
-Regan#8 Nenana Glacier Spot 25	361.891	3191.57	3.29496	22.8351	2.77267	0.0364287	3.21859	0.00604085	1.3264	0.316152	38.8247	0.513421	35.1482	1.44939	NA	NA	38.8247	0.513421	NA	1.32241
-Regan#8 Nenana Glacier Spot 51	474.961	5000.58	3.93601	23.6373	3.98025	0.0352218	4.19544	0.00604198	1.32125	0.460577	38.8319	0.511524	37.7188	1.06218	NA	NA	38.8319	0.511524	NA	1.31728
-Regan#8 Nenana Glacier Spot 66	846.987	7344	3.61281	22.0025	2.5463	0.037846	2.86868	0.00604364	1.16872	0.763131	38.8426	0.452598	38.496	0.578525	16.9213	23.7799	38.8426	0.452598	NA	1.16521
-Regan#8 Nenana Glacier Spot 48	2461.3	43886.7	5.92802	21.5559	0.989712	0.0386407	1.53149	0.00605398	1.32729	0.701088	38.9088	0.514879	38.5923	0.716917	18.9752	32.4012	38.9088	0.514879	NA	1.3233
-Regan#8 Nenana Glacier Spot 22	1157.22	103116	3.33713	21.5379	1.34999	0.0387392	1.89319	0.00606167	1.16176	0.605881	38.9581	0.451234	36.8383	0.693704	NA	NA	38.9581	0.451234	NA	1.15826
-Regan#8 Nenana Glacier Spot 69	634.68	7733.46	3.63886	22.6117	1.52545	0.0369464	1.91747	0.00606231	1.42496	0.72997	38.9622	0.553522	39.066	0.748118	45.4706	31.8753	38.9622	0.553522	NA	1.42066
-Regan#8 Nenana Glacier Spot 24	596.799	19649.3	2.86347	21.301	1.33421	0.0392239	1.95208	0.00606742	0.999794	0.562042	38.9949	0.388692	38.3756	0.669909	NA	NA	38.9949	0.388692	NA	0.996776
-Regan#8 Nenana Glacier Spot 95	1445.82	761978	3.17503	21.71	1.47131	0.0385174	1.77886	0.00606838	0.991243	0.746599	39.0011	0.385428	38.4361	0.500769	3.31044	21.266	39.0011	0.385428	NA	0.988251
-Regan#8 Nenana Glacier Spot 23	4028.09	46628.2	3.89974	21.6785	0.883269	0.0385793	1.32768	0.00607585	0.81026	0.793527	39.049	0.315442	39.1114	0.391768	42.9542	14.8571	39.049	0.315442	NA	0.807811
-Regan#8 Nenana Glacier Spot 56	6414.35	440173	5.02527	21.3233	0.621368	0.0392704	1.02109	0.00607634	0.95117	0.567598	39.0521	0.370329	38.6988	0.636304	16.8178	33.1376	39.0521	0.370329	NA	0.948294
-Regan#8 Nenana Glacier Spot 61	1346.7	42357	3.79618	21.5568	1.37968	0.0388481	1.67578	0.00607712	0.885723	0.811363	39.0571	0.344892	39.6844	0.424858	77.7652	15.1747	39.0571	0.344892	NA	0.883046
-Regan#8 Nenana Glacier Spot 6	13704.6	2.41809e+06	4.80437	21.0138	0.638115	0.039857	1.09165	0.00607733	1.39988	0.768875	39.0584	0.545119	38.9591	0.695887	32.8535	27.8783	39.0584	0.545119	NA	1.39565
-Regan#8 Nenana Glacier Spot 33	1371.16	44838.1	4.27186	21.4135	1.16415	0.0391144	1.82069	0.00608421	1.21631	0.824622	39.1025	0.47417	39.5	0.571437	63.7148	19.8561	39.1025	0.47417	NA	1.21263
-Regan#8 Nenana Glacier Spot 41	4013.07	209930	6.73229	21.1385	0.834382	0.0396682	1.475	0.00608676	1.27032	0.543707	39.1189	0.49543	36.8987	0.846628	NA	NA	39.1189	0.49543	NA	1.26647
-Regan#8 Nenana Glacier Spot 97	423.657	4985.76	2.67463	22.6674	1.96089	0.037008	2.33641	0.00608823	0.970156	0.740464	39.1283	0.378456	39.043	0.501832	33.7928	21.0738	39.1283	0.378456	NA	0.967218
-Regan#8 Nenana Glacier Spot 99	4890.55	285869	5.02919	21.4049	0.880579	0.0392004	1.3102	0.006089	1.06949	0.657949	39.1332	0.417257	38.2824	0.610691	NA	NA	39.1332	0.417257	NA	1.06625
-Regan#8 Nenana Glacier Spot 16	805.098	22988.4	2.94196	21.8412	1.22409	0.0384221	1.62549	0.00609213	0.917143	0.66909	39.1532	0.358003	39.4345	0.53018	56.5979	24.2786	39.1532	0.358003	NA	0.914364
-Regan#8 Nenana Glacier Spot 42	7161.82	159446	5.52085	21.2019	1.0187	0.0396011	1.37073	0.00609276	0.925833	0.801552	39.1573	0.361432	39.2794	0.445033	46.7438	16.5107	39.1573	0.361432	NA	0.923026
-Regan#8 Nenana Glacier Spot 77	4453.23	48757.8	3.3898	21.2894	0.690634	0.0394423	1.15505	0.00609371	1.6298	0.693798	39.1634	0.636352	40.4739	0.932075	118.848	39.9031	39.1634	0.636352	NA	1.62486
-Regan#8 Nenana Glacier Spot 31	662.522	52382.7	4.35011	20.6521	1.69176	0.0406658	2.34911	0.00609467	1.48347	0.812662	39.1695	0.579306	38.5373	0.690294	NA	NA	39.1695	0.579306	NA	1.47897
-Regan#8 Nenana Glacier Spot 27	1952.75	29141	4.81257	21.7142	1.06375	0.0386829	1.82544	0.0061041	1.32364	0.645474	39.23	0.517685	38.6483	0.777644	2.66015	37.7359	39.23	0.517685	NA	1.31962
-Regan#8 Nenana Glacier Spot 46	595.649	12298.8	3.34524	21.6842	1.56625	0.0387964	2.05064	0.00610588	1.23375	0.450533	39.2414	0.48267	40.7866	1.09478	132.684	57.5107	39.2414	0.48267	NA	1.23
-Regan#8 Nenana Glacier Spot 8	434.361	18967.4	3.78206	20.5315	2.44475	0.0409864	2.73842	0.00610604	0.815275	0.696749	39.2424	0.318961	38.7804	0.445219	10.2836	20.1857	39.2424	0.318961	NA	0.812798
-Regan#8 Nenana Glacier Spot 1	2897.24	62380.5	2.20374	21.6157	0.839339	0.0389316	1.17011	0.00610613	1.13258	0.709488	39.243	0.443108	38.7192	0.606452	6.35708	27.0715	39.243	0.443108	NA	1.12914
-Regan#8 Nenana Glacier Spot 72	2069.54	42160.4	4.47506	21.6509	1.12497	0.038869	1.59633	0.00610744	1.39281	0.848245	39.2514	0.545036	38.468	0.619826	NA	NA	39.2514	0.545036	NA	1.38858
-Regan#8 Nenana Glacier Spot 92	4618.3	100856	3.07062	21.7996	0.869606	0.038612	1.64199	0.00610847	1.04295	0.772461	39.2579	0.408196	38.8132	0.514153	11.4201	20.6128	39.2579	0.408196	NA	1.03978
-Regan#8 Nenana Glacier Spot 21	3639.43	81453.7	3.55018	21.6057	0.857438	0.0389652	1.35016	0.00610944	1.16976	0.839795	39.2642	0.4579	38.903	0.531634	16.6538	18.149	39.2642	0.4579	NA	1.1662
-Regan#8 Nenana Glacier Spot 68	3729.73	44548.1	3.88876	21.5583	0.756217	0.039057	1.39291	0.00611715	0.715482	0.617603	39.3136	0.280426	38.994	0.443174	19.3917	21.8825	39.3136	0.280426	NA	0.713305
-Regan#8 Nenana Glacier Spot 86	5638.89	109374	5.66365	21.5342	0.911134	0.0391502	1.15848	0.00611812	1.34667	0.523756	39.3198	0.527896	37.489	0.94633	NA	NA	39.3198	0.527896	NA	1.34257
-Regan#8 Nenana Glacier Spot 81	440.303	83365.7	3.20542	22.4189	2.1903	0.037611	2.57118	0.00611819	0.828423	0.638819	39.3202	0.324746	40.0109	0.508773	81.6083	23.6824	39.3202	0.324746	NA	0.825902
-Regan#8 Nenana Glacier Spot 73	1921.43	35166.2	3.17072	20.9798	0.997706	0.0401914	1.2968	0.00611902	1.22417	0.608322	39.3255	0.479945	37.1415	0.733919	NA	NA	39.3255	0.479945	NA	1.22044
-Regan#8 Nenana Glacier Spot 60	603.934	20726.5	3.03282	22.6359	1.5972	0.037256	2.01237	0.00612044	1.23807	0.616492	39.3346	0.485509	39.4381	0.776833	45.7593	37.7881	39.3346	0.485509	NA	1.2343
-Regan#8 Nenana Glacier Spot 10	887.93	131568	4.31837	21.2984	1.58122	0.0396047	2.00825	0.00612065	1.20194	0.637262	39.336	0.471356	37.6591	0.697278	NA	NA	39.336	0.471356	NA	1.19828
-Regan#8 Nenana Glacier Spot 55	1164.88	26680.2	4.05433	22.325	1.45352	0.0377849	1.8861	0.00612458	1.3926	0.722357	39.3612	0.546474	41.7147	0.787904	179.229	31.0861	39.3612	0.546474	NA	1.38836
-Regan#8 Nenana Glacier Spot 9	1141.94	208690	1.72976	20.1269	1.33315	0.0419383	1.92785	0.00613104	1.93464	0.599283	39.4025	0.75997	36.9133	1.17025	NA	NA	39.4025	0.75997	NA	1.92873
-Regan#8 Nenana Glacier Spot 13	281.127	8741.12	3.54821	22.8231	2.58434	0.0370229	3.22825	0.00613456	1.72992	0.57284	39.4251	0.679942	43.119	1.27489	253.744	56.9391	39.4251	0.679942	NA	1.72464
-Regan#8 Nenana Glacier Spot 29	732.911	8956.81	3.23462	19.4896	2.47532	0.0433803	3.01991	0.00613545	0.982534	0.695447	39.4308	0.386239	39.4028	0.546023	37.6724	24.2959	39.4308	0.386239	NA	0.979536
-Regan#8 Nenana Glacier Spot 54	3055.43	219970	2.67357	21.3702	1.01521	0.0395686	1.41281	0.00614494	0.976782	0.762996	39.4916	0.384568	39.1752	0.491967	19.8314	19.8723	39.4916	0.384568	NA	0.973796
-Regan#8 Nenana Glacier Spot 17	4697.32	315642	5.81455	21.53	0.827522	0.0393356	1.28019	0.00614511	1.20789	0.541002	39.4927	0.47557	38.3662	0.840618	NA	NA	39.4927	0.47557	NA	1.2042
-Regan#8 Nenana Glacier Spot 88	743.869	17215	3.5546	21.9934	1.87774	0.0385079	2.23269	0.00615108	1.08356	0.82234	39.5309	0.427031	39.4561	0.509925	34.9103	17.9664	39.5309	0.427031	NA	1.08025
-Regan#8 Nenana Glacier Spot 83	7740.28	131546	2.8309	21.3951	0.749742	0.0396232	1.31766	0.00616724	1.06863	0.770485	39.6345	0.422247	39.2628	0.534164	16.5753	21.2214	39.6345	0.422247	NA	1.06535
-Regan#8 Nenana Glacier Spot 70	1263.21	64640.7	2.07115	21.559	0.884128	0.0394253	1.38696	0.0061679	1.32452	0.606775	39.6387	0.523412	39.4749	0.845158	29.5504	41.5695	39.6387	0.523412	NA	1.32046
-Regan#8 Nenana Glacier Spot 58	805.595	315656	2.61225	21.4432	1.73512	0.0396424	2.18289	0.00617108	1.27636	0.759069	39.6591	0.504638	39.0869	0.644748	4.11537	26.3565	39.6591	0.504638	NA	1.27244
-Regan#8 Nenana Glacier Spot 19	2393.43	19124.2	6.48003	21.6714	1.09466	0.0392453	1.68148	0.00617715	1.3608	0.451198	39.698	0.53855	38.3363	1.13466	NA	NA	39.698	0.53855	NA	1.35662
-Regan#8 Nenana Glacier Spot 30	289.474	4571.35	4.57163	22.1256	2.69152	0.0384773	3.01597	0.00619416	1.14818	0.778279	39.807	0.455649	39.511	0.571704	21.5598	22.2365	39.807	0.455649	NA	1.14465
-Regan#8 Nenana Glacier Spot 64	4529.71	154232	6.61542	21.5144	0.926358	0.0396794	1.47528	0.00619835	0.932382	0.565829	39.8338	0.370258	39.9007	0.64474	43.9218	32.4571	39.8338	0.370258	NA	0.929508
-Regan#8 Nenana Glacier Spot 67	1466.81	21693.6	3.68072	21.3146	1.35866	0.0400785	1.64782	0.00619994	1.18703	0.65069	39.844	0.471501	40.1795	0.718664	60.2784	33.0139	39.844	0.471501	NA	1.18337
-Regan#8 Nenana Glacier Spot 35	675.549	51504.2	2.309	21.1692	1.38524	0.0403641	1.82426	0.00620133	1.10034	0.713031	39.8529	0.437166	39.6086	0.599469	24.8095	25.9492	39.8529	0.437166	NA	1.09695
-Regan#8 Nenana Glacier Spot 85	2229.01	1.82935e+06	1.89047	21.4852	1.08198	0.0397794	1.54319	0.00620998	1.23372	0.813584	39.9083	0.490834	40.2428	0.598306	60.2324	20.9898	39.9083	0.490834	NA	1.2299
-Regan#8 Nenana Glacier Spot 34	6114.63	479492	6.57181	21.1694	0.881704	0.040429	1.5164	0.0062127	1.24022	0.838542	39.9257	0.493637	40.6796	0.589767	85.3958	19.108	39.9257	0.493637	NA	1.23639
-Regan#8 Nenana Glacier Spot 12	10468.8	608209	10.1074	20.9468	0.805827	0.0408767	1.47902	0.00621823	1.27718	0.816271	39.9612	0.508798	39.061	0.599564	NA	NA	39.9612	0.508798	NA	1.27323
-Regan#8 Nenana Glacier Spot 80	3075.42	28316.3	8.73637	21.8517	0.903852	0.0392188	1.56466	0.00622092	1.21978	0.753727	39.9784	0.486139	39.2313	0.622783	NA	NA	39.9784	0.486139	NA	1.21601
-Regan#8 Nenana Glacier Spot 91	4126.01	119668	6.9092	21.7644	1.06355	0.039393	1.61833	0.00623124	0.942404	0.678855	40.0445	0.376211	38.782	0.52823	NA	NA	40.0445	0.376211	NA	0.939483
-Regan#8 Nenana Glacier Spot 7	1259.7	35229.3	3.38291	22.058	1.01934	0.0389332	1.38823	0.00623924	1.72544	0.635693	40.0958	0.689683	38.1418	1.01607	NA	NA	40.0958	0.689683	NA	1.72009
-Regan#8 Nenana Glacier Spot 63	343.691	14173.5	3.87371	22.4642	2.09526	0.0382784	2.71427	0.00624219	1.5201	0.644245	40.1147	0.607888	38.7677	0.897482	NA	NA	40.1147	0.607888	NA	1.51538
-Regan#8 Nenana Glacier Spot 75	651.045	8379.98	6.74972	22.1051	1.80459	0.0389186	2.3595	0.00624518	1.05947	0.867533	40.1338	0.423887	40.4544	0.484337	59.5306	14.5012	40.1338	0.423887	NA	1.05618
-Regan#8 Nenana Glacier Spot 94	5123.68	115121	9.01896	21.1759	0.607425	0.0406458	1.22125	0.00627658	1.23766	0.525794	40.335	0.497653	41.1233	0.94866	87.3878	47.4795	40.335	0.497653	NA	1.2338
-Regan#8 Nenana Glacier Spot 65	1202.35	7402.54	6.95044	20.9292	2.00225	0.0413316	2.35389	0.00627894	1.29731	0.461527	40.3501	0.521832	38.9793	1.07491	NA	NA	40.3501	0.521832	NA	1.29326
-Regan#8 Nenana Glacier Spot 32	285.428	11747.7	3.60382	22.1122	2.49364	0.0391352	2.81092	0.00628426	1.01256	0.736519	40.3842	0.407637	41.8045	0.563055	124.066	21.917	40.3842	0.407637	NA	1.0094
-Regan#8 Nenana Glacier Spot 18	4053.18	94753.9	2.71759	20.6064	0.929933	0.0420304	1.37479	0.00633061	0.964353	0.754816	40.6811	0.391074	40.9123	0.512305	54.515	19.9783	40.6811	0.391074	NA	0.961316
-Regan#8 Nenana Glacier Spot 71	5108.99	60832	6.80456	21.2205	0.838024	0.0411152	1.2776	0.00633954	1.40459	0.615599	40.7383	0.570402	41.4717	0.92718	84.082	42.6861	40.7383	0.570402	NA	1.40016
-Regan#8 Nenana Glacier Spot 62	608.217	10917	2.39886	20.958	1.79809	0.0416889	2.28166	0.0063569	1.3236	0.452872	40.8495	0.538974	43.3404	1.24005	183.442	60.7142	40.8495	0.538974	NA	1.31941
-Regan#8 Nenana Glacier Spot 47	347.156	30902.6	3.42227	20.0906	2.60579	0.0436079	2.92268	0.0063747	0.986367	0.704317	40.9636	0.40277	40.2449	0.55259	NA	NA	40.9636	0.40277	NA	0.98324
-Regan#8 Nenana Glacier Spot 79	2132.38	29654.4	2.09829	21.7298	0.994166	0.0404312	1.40046	0.0064257	1.47715	0.627751	41.2902	0.60797	43.5206	1.00244	168.219	42.7939	41.2902	0.60797	NA	1.47243
-Regan#8 Nenana Glacier Spot 5	551.905	135619	2.98891	20.2221	1.83167	0.0437931	2.35308	0.00648714	1.05352	0.686295	41.6837	0.437728	42.223	0.634864	72.9656	26.5245	41.6837	0.437728	NA	1.05012
-Regan#8 Nenana Glacier Spot 20	2773.54	1.46933e+06	5.36921	21.0564	1.1165	0.04246	1.53508	0.00658698	1.45169	0.549892	42.3232	0.612388	41.3774	1.07039	NA	NA	42.3232	0.612388	NA	1.44693
-Regan#8 Nenana Glacier Spot 11	611.937	10003.4	5.48951	21.8266	2.20499	0.0415922	2.63995	0.00679123	1.224	0.704385	43.6311	0.532241	43.6089	0.741744	42.3663	29.4812	43.6311	0.532241	NA	1.21987
-Regan#8 Nenana Glacier Spot 3	1123.67	38943.9	3.5629	21.3283	1.23344	0.0438838	1.73769	0.00898996	1.13185	0.660329	57.694	0.650096	57.2013	0.953364	36.595	30.8371	57.694	0.650096	NA	1.1268
-Regan#8 Nenana Glacier Spot 82	1144.34	52774	1.96317	21.3798	1.28723	0.0579517	1.71407	0.0091663	0.981748	0.533594	58.8206	0.574844	57.8716	1.03499	18.7958	37.3587	58.8206	0.574844	NA	0.977283
-Regan#8 Nenana Glacier Spot 43	435.039	12475.8	2.14887	21.5395	1.55606	0.0586504	1.83988	0.0101439	1.03373	0.687937	65.0626	0.669188	63.2411	0.921302	NA	NA	65.0626	0.669188	NA	1.02853
-Regan#8 Nenana Glacier Spot 39	876.766	16453.1	4.681	21.7548	1.09058	0.0642634	1.50265	0.0102064	1.03468	0.549837	65.4612	0.673885	61.5474	1.12379	NA	NA	65.4612	0.673885	NA	1.02944
-Regan#8 Nenana Glacier Spot 57	506.534	4109.68	3.85224	22.51	1.5718	0.0624898	1.88179	0.0102981	0.99153	0.464173	66.0464	0.651527	66.4214	1.37343	79.9284	44.9282	66.0464	0.651527	NA	0.986468
-Regan#8 Nenana Glacier Spot 52	318.467	10382.5	1.62384	20.9947	1.89206	0.0676021	2.13612	0.0104732	1.2018	0.634783	67.1632	0.802976	66.267	1.21453	34.0165	35.0157	67.1632	0.802976	NA	1.19556
-Regan#8 Nenana Glacier Spot 98	393.779	108507	2.8565	21.403	1.46289	0.0674397	1.89324	0.010608	1.44041	0.82936	68.0237	0.974666	67.3485	1.13174	43.4257	23.1912	68.0237	0.974666	NA	1.43283
-Regan#8 Nenana Glacier Spot 53	1782.64	61842.8	3.14437	21.319	0.970356	0.0685773	1.73677	0.0106191	1.45237	0.533066	68.0942	0.983772	65.423	1.72628	NA	NA	68.0942	0.983772	NA	1.44472
-Regan#8 Nenana Glacier Spot 74	200.341	16080.6	2.17754	21.9904	2.30517	0.0665529	2.72455	0.0150957	1.23341	0.62197	96.5859	1.18242	92.6671	1.75629	NA	NA	96.5859	1.18242	NA	1.22421
-Regan#8 Nenana Glacier Spot 26	426.802	10525.9	4.21933	21.7722	1.55282	0.0955573	1.98307	0.0151033	1.14313	0.719799	96.6345	1.09642	93.7538	1.42225	21.0345	26.4679	96.6345	1.09642	NA	1.1346
-Regan#8 Nenana Glacier Spot 78	747.587	20402.7	2.19992	21.519	1.10244	0.0967304	1.58812	0.0152038	1.37384	0.723647	97.2725	1.32634	95.1932	1.72511	43.4122	31.3239	97.2725	1.32634	NA	1.36353
-Regan#8 Nenana Glacier Spot 2	750.543	19464.6	3.52864	21.3192	1.31029	0.0982863	1.8985	0.0153092	1.21995	0.75732	97.9419	1.18581	98.7212	1.51541	117.6	24.8152	97.9419	1.18581	NA	1.21073
-Regan#8 Nenana Glacier Spot 38	990.892	145819	4.4198	20.6634	1.05197	0.102109	1.61087	0.015332	1.41863	0.760643	98.0865	1.38095	97.2308	1.72927	76.2708	28.7483	98.0865	1.38095	NA	1.40789
-Regan#8 Nenana Glacier Spot 0	366.44	18023.4	7.72183	21.027	1.21073	0.100492	1.86504	0.0153616	1.21126	0.54401	98.2742	1.18132	95.6874	2.03321	31.6937	44.7434	98.2742	1.18132	NA	1.20207
-Regan#8 Nenana Glacier Spot 96	476.033	51148.7	9.01716	21.4239	1.86824	0.0988209	2.22653	0.0158868	1.34332	0.70583	101.608	1.35422	690.355	9.53368	4066.93	20.0871	101.608	1.35422	NA	1.33279
-Regan#8 Nenana Glacier Spot 14	50.5577	708.201	50.066	2.24872	1.34818	0.973673	1.90318	0.054973	1.27738	0.787499	344.981	4.29088	340.632	4.69403	311.071	22.7439	344.981	4.29088	NA	1.2438
-Regan#8 Nenana Glacier Spot 49	227.561	92043.8	2.27829	19.0075	0.999709	0.398599	1.62207	0.25075	0.672761	0.693368	1442.34	8.6946	1585.93	7.78588	1782.47	12.7472	1782.47	12.7472	80.9184	0.715145
-Regan#8 Nenana Glacier Spot 90	758.011	330617	3.69448	9.17176	0.699167	3.76791	0.970279

[truncated: 23 more sheets: This study--AFT, This study--AHe, Legacy--AFT, Legacy--AHe, 2019Ar dikes--Trop, 2019Ar--Benowitz, 2014Ar--Benowitz, 2014Ar--Riccio, 2011Ar--Benowitz A, 2011Ar--Benowitz B, <1 Ma--Ar, Legacy--K-Ar, 2021U-Pb--Regan Bed, 2021U-Pb--Regan Det, Legacy--U-Pb, 2013U-Pb--Nokleberg, 2021Wrangells-Trop, 2021U-Pb--Jones, 2020U-Pb-Regan, 2016U-Pb--Lease …]
