# Supplementary material
Source: publisher figshare collection journal article supplement (https://gsapubs.figshare.com/articles/dataset/_/19067528)

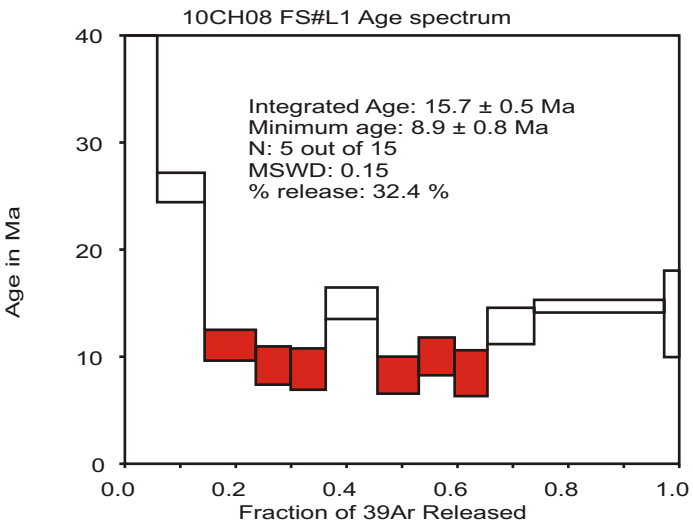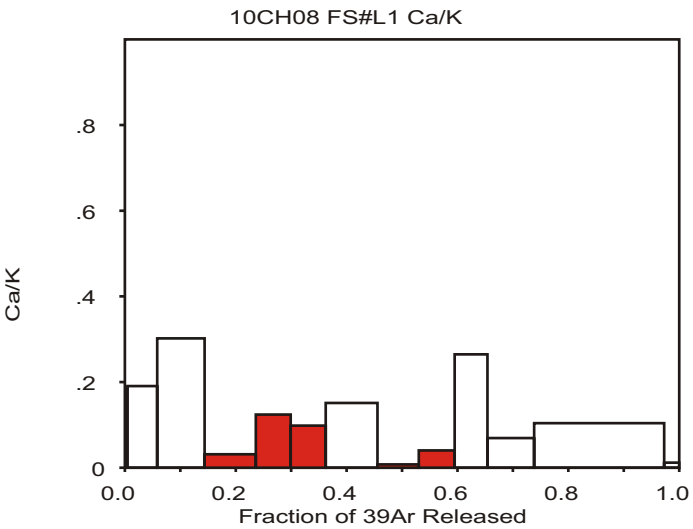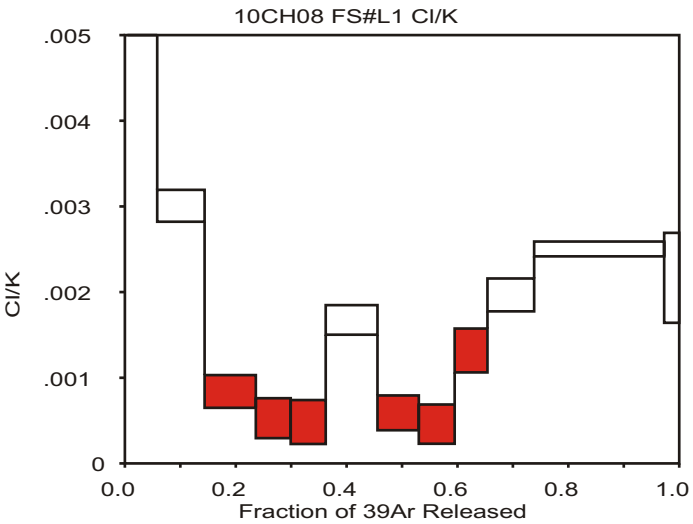

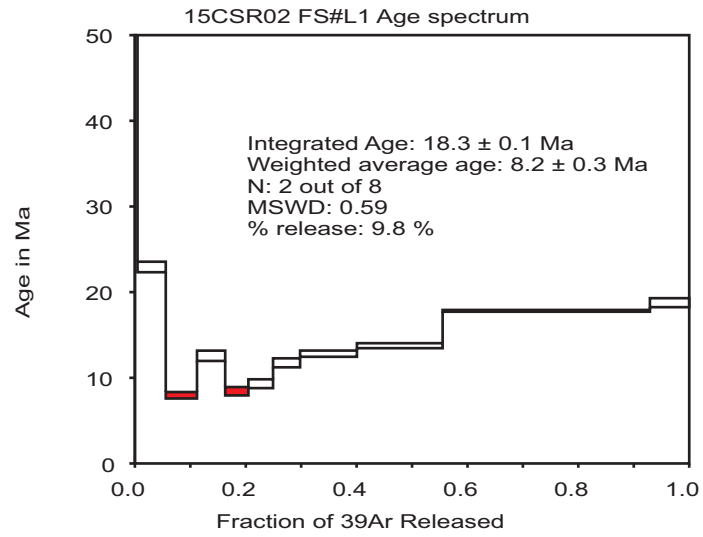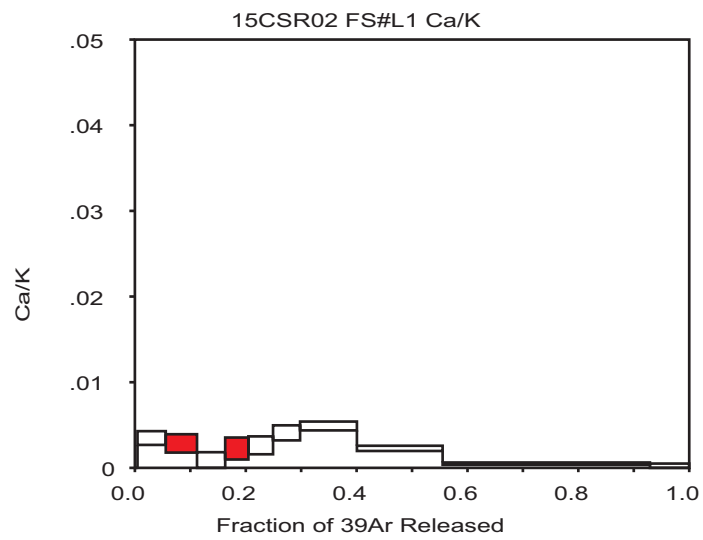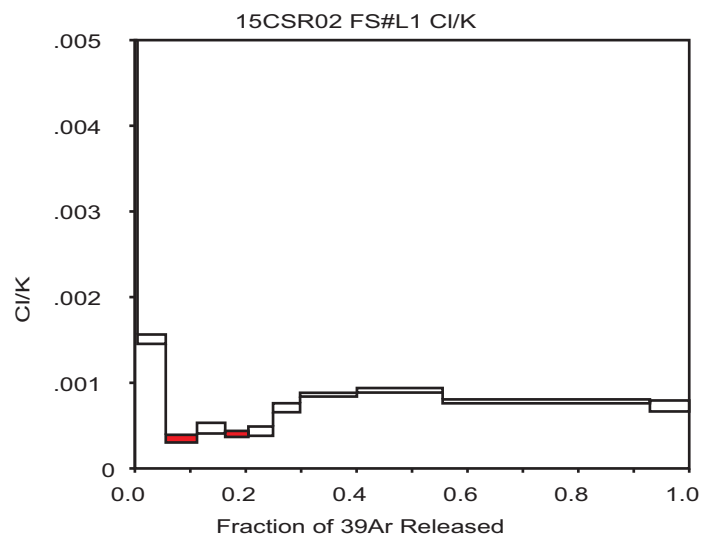

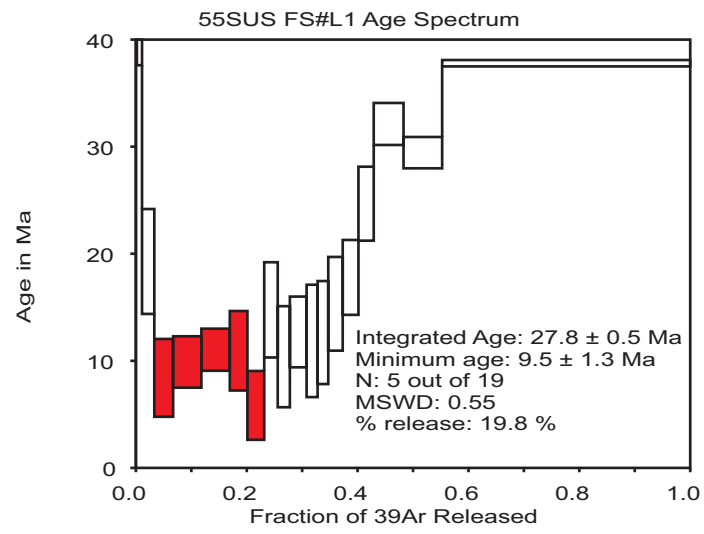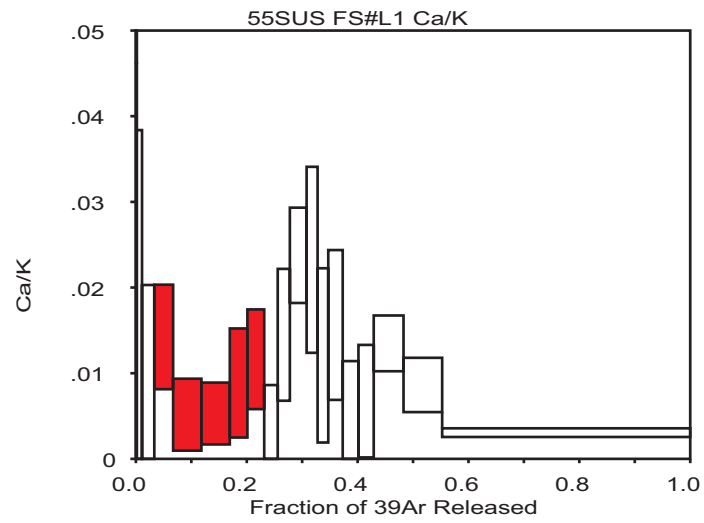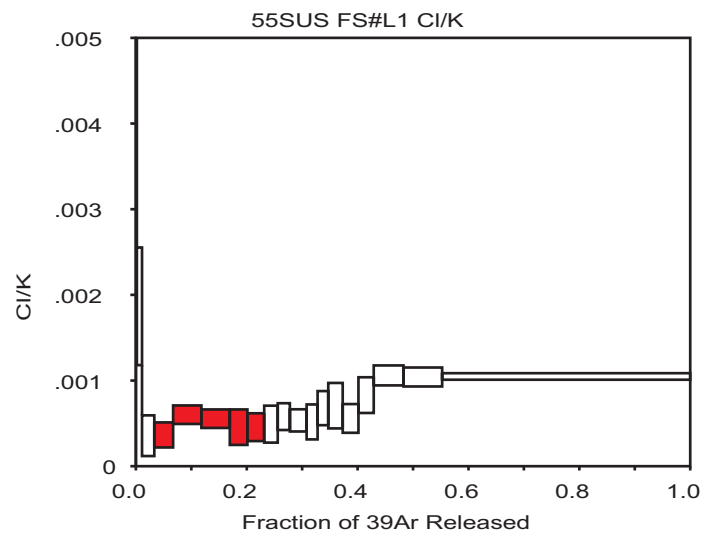

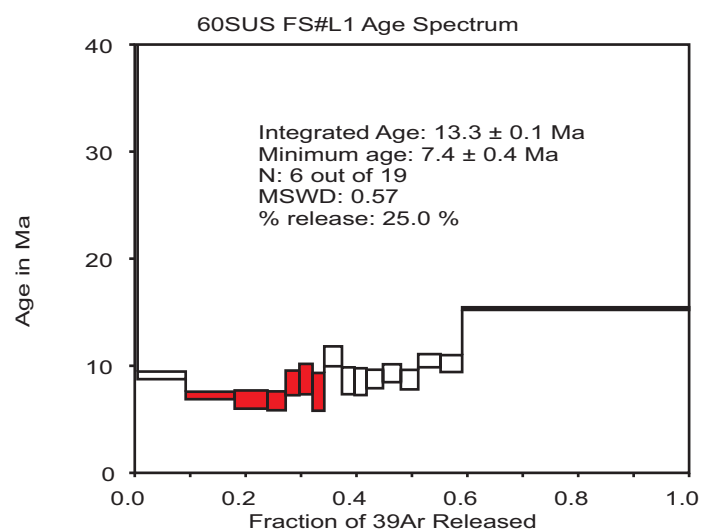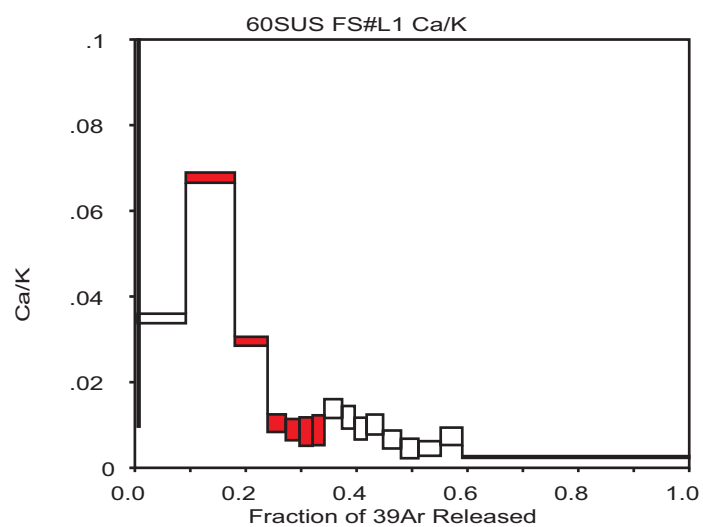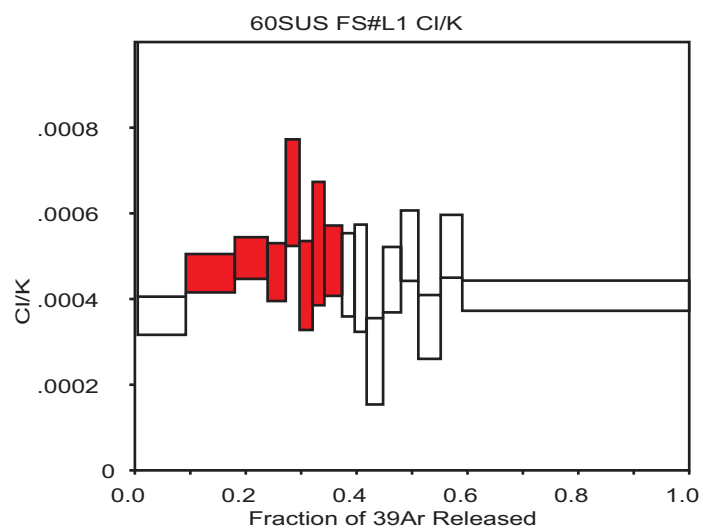

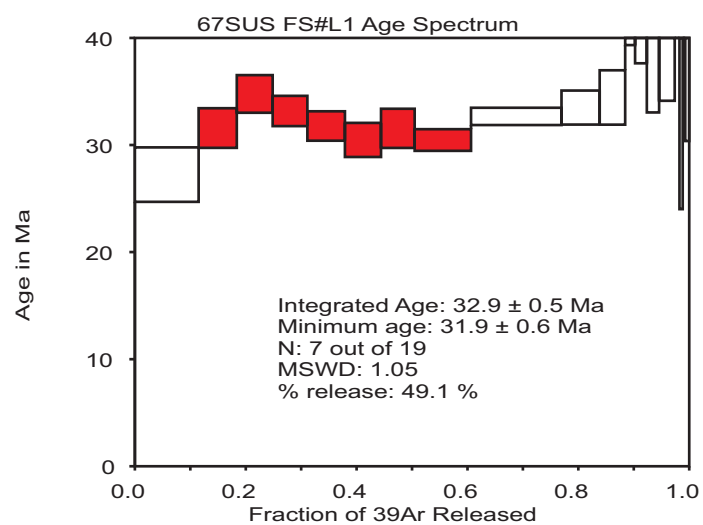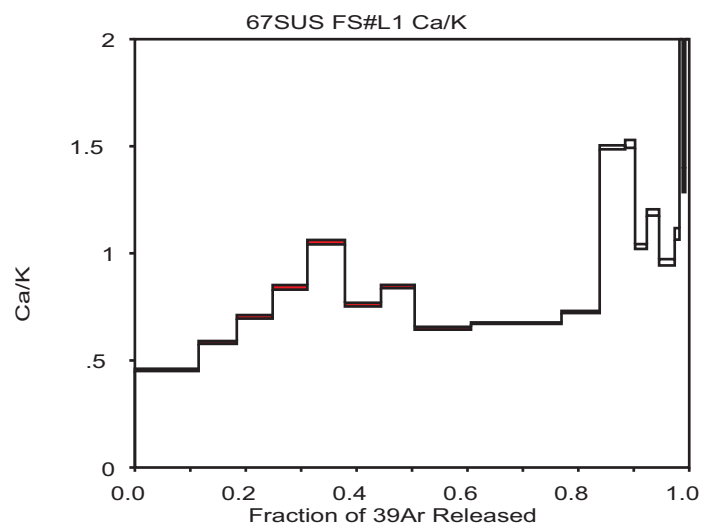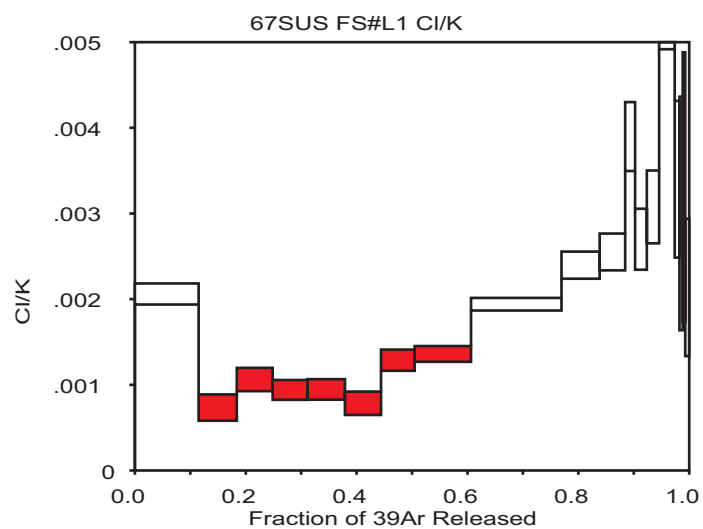

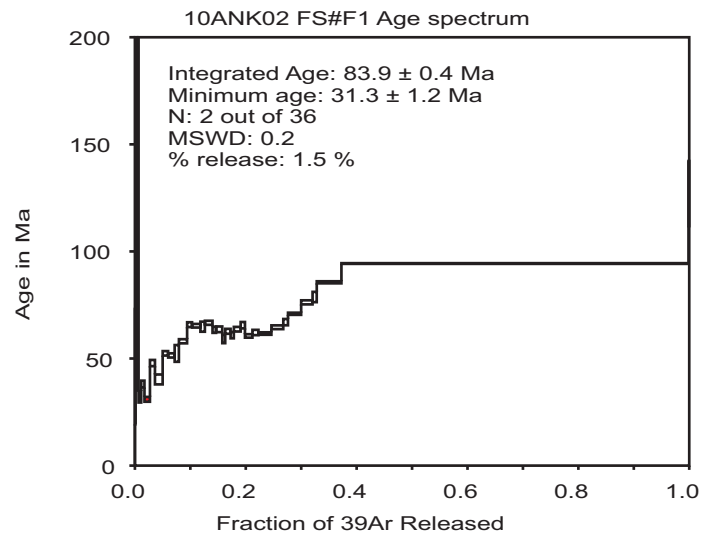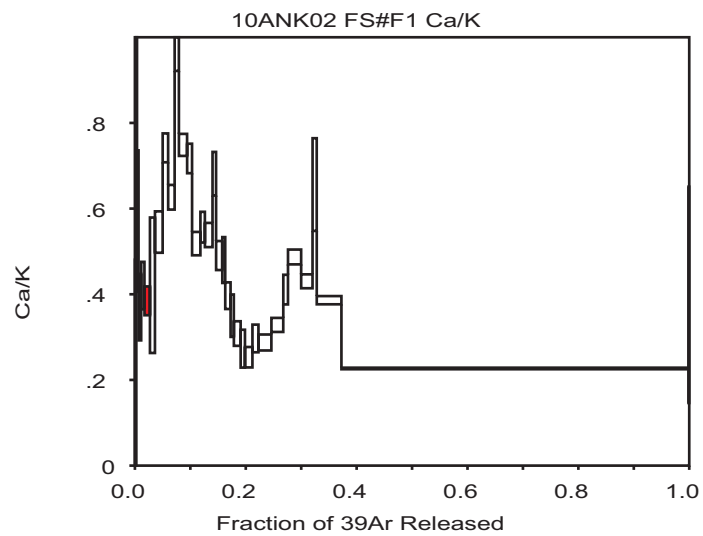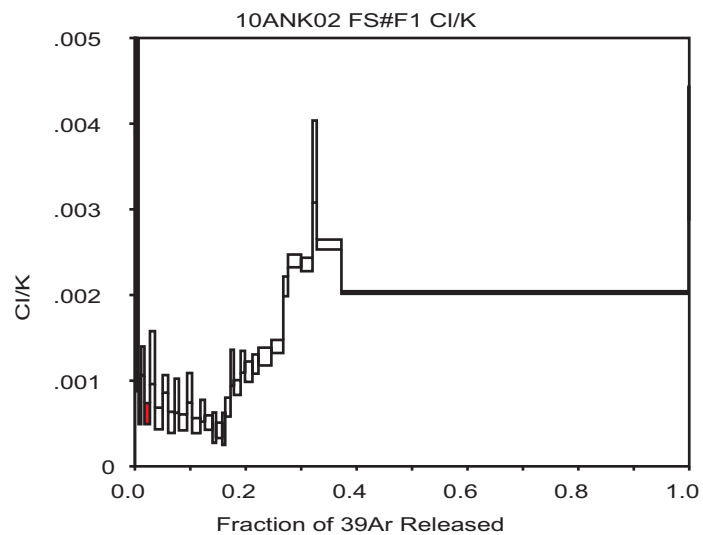

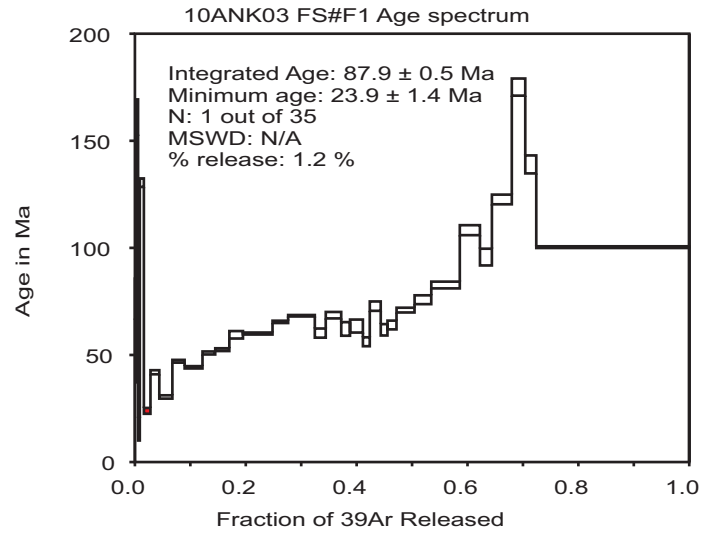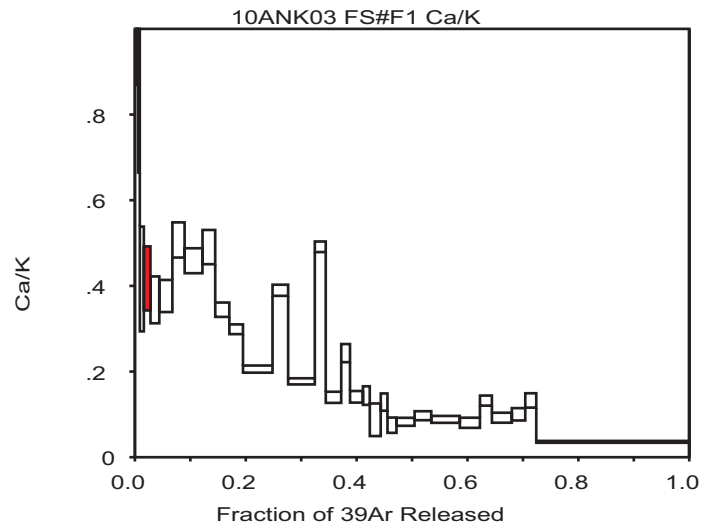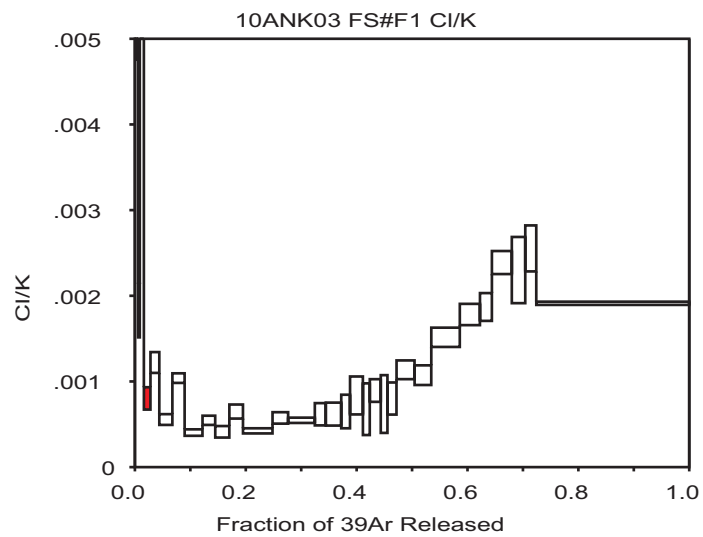

Supplement: Supplementary file 1 [file 2]

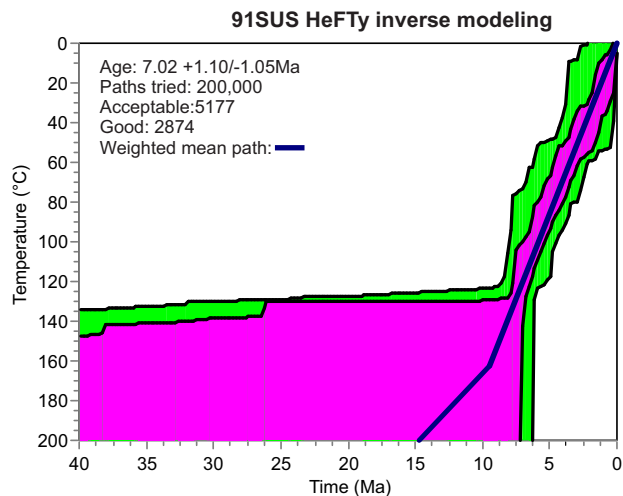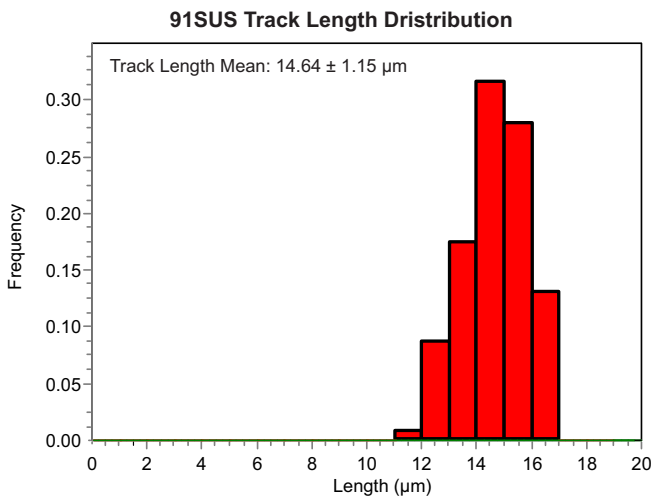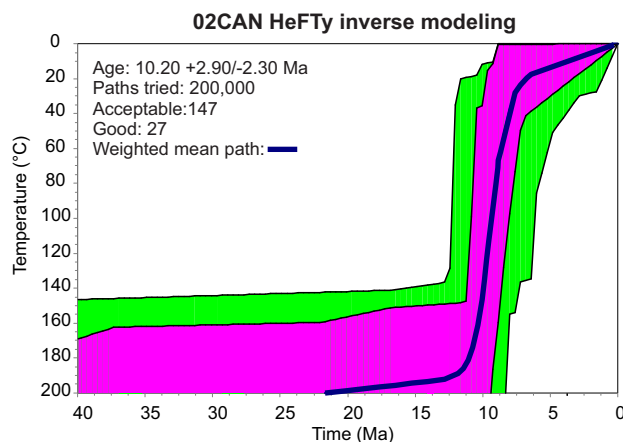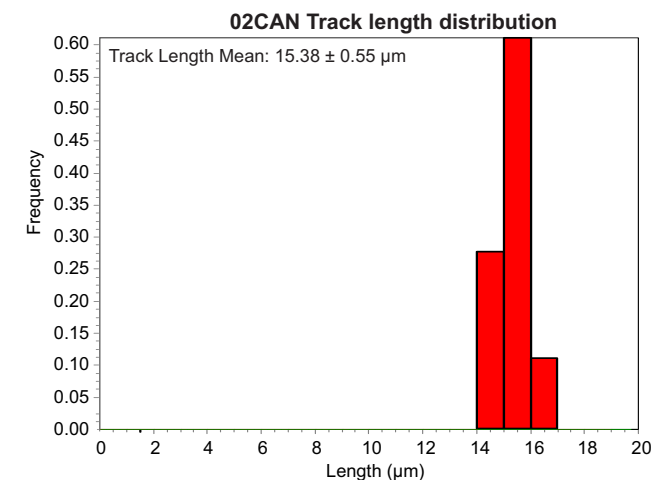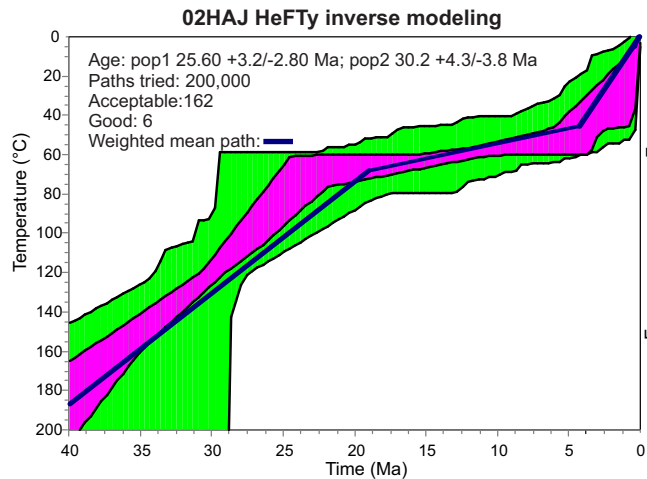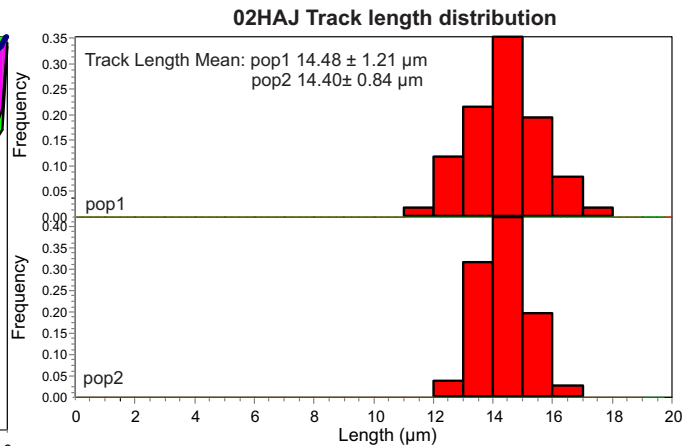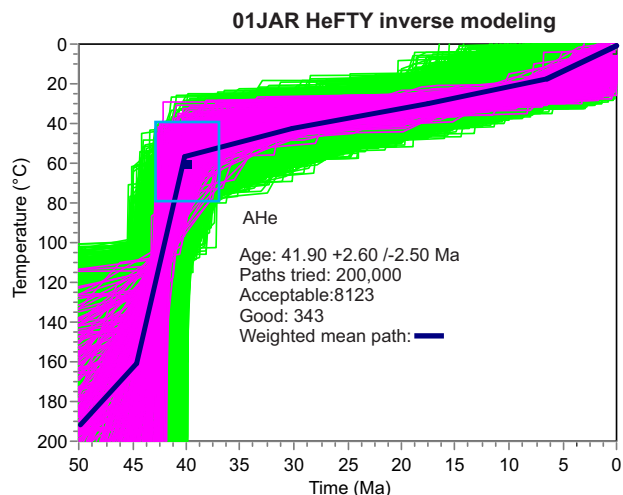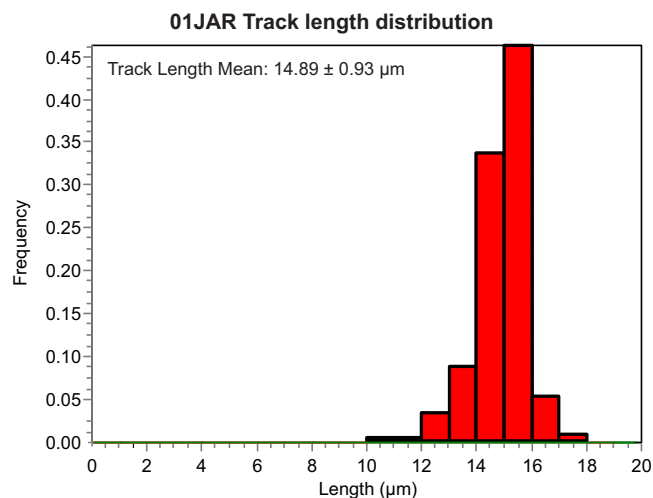

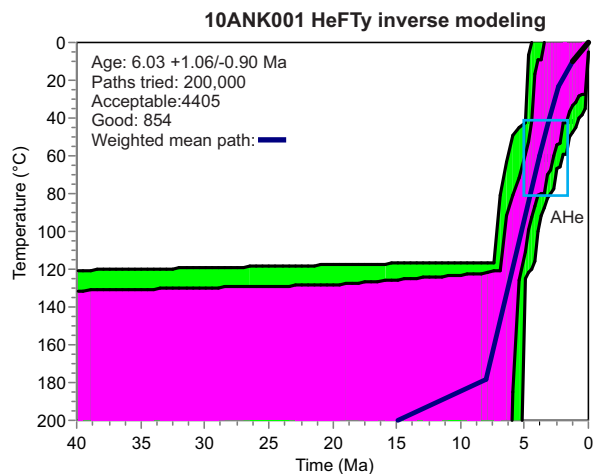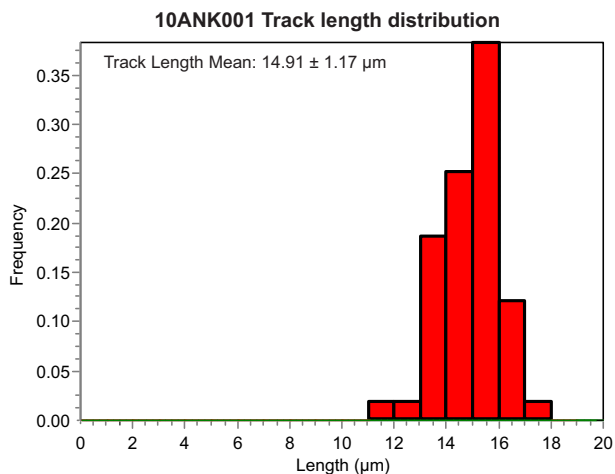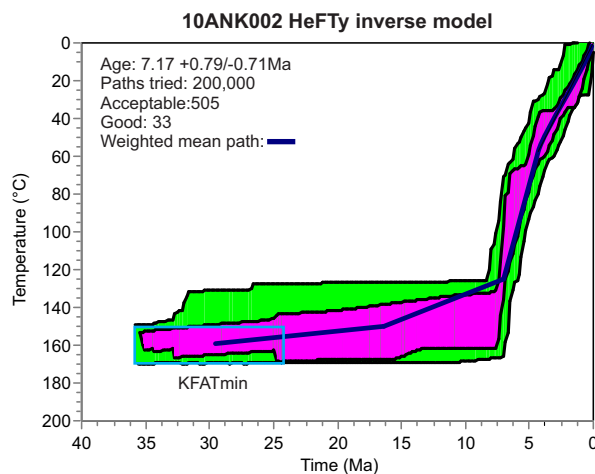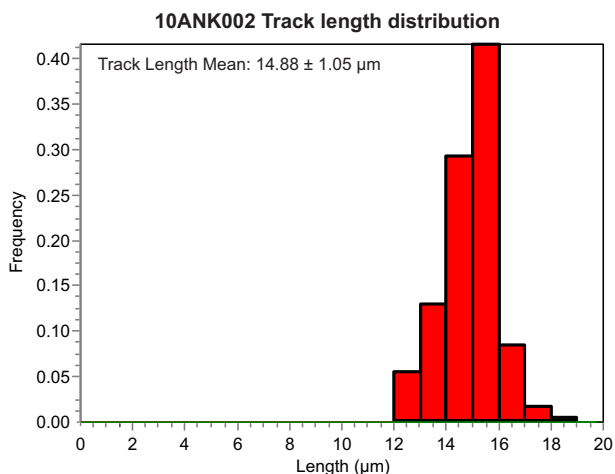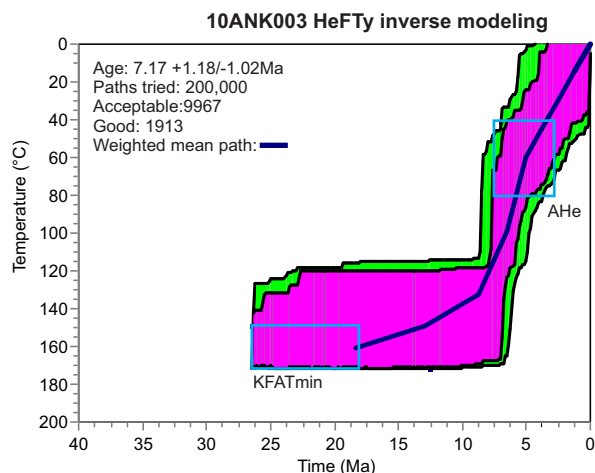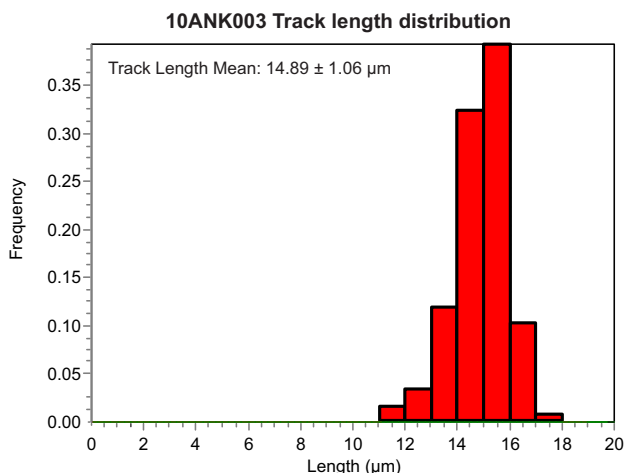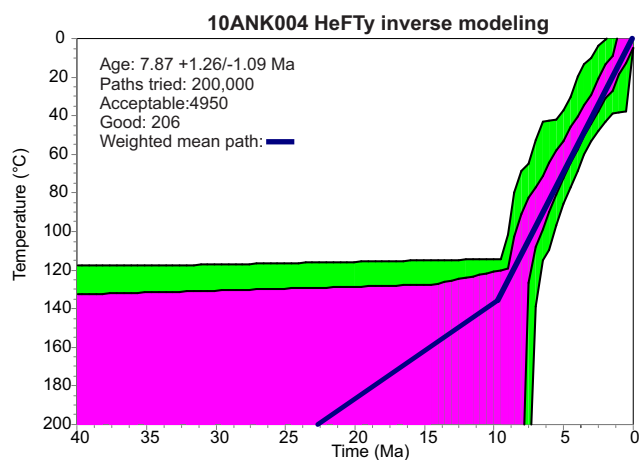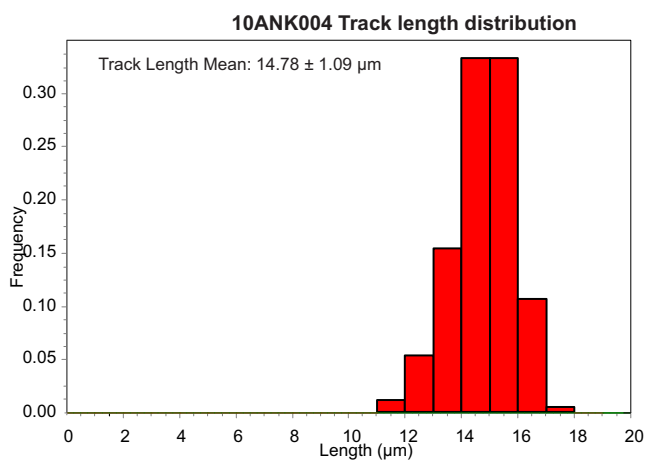

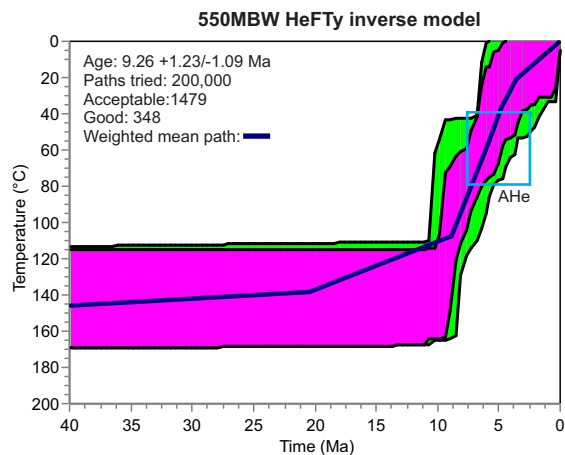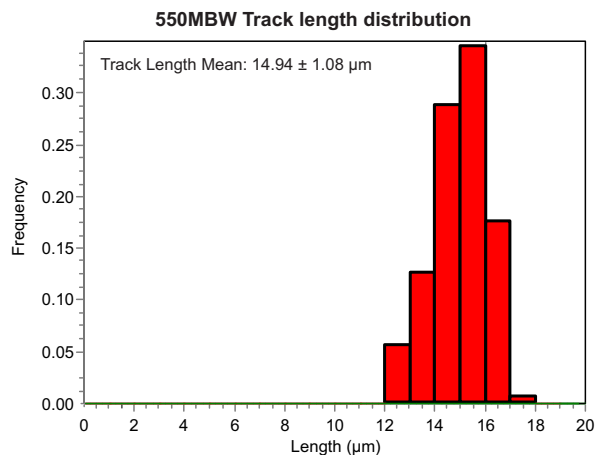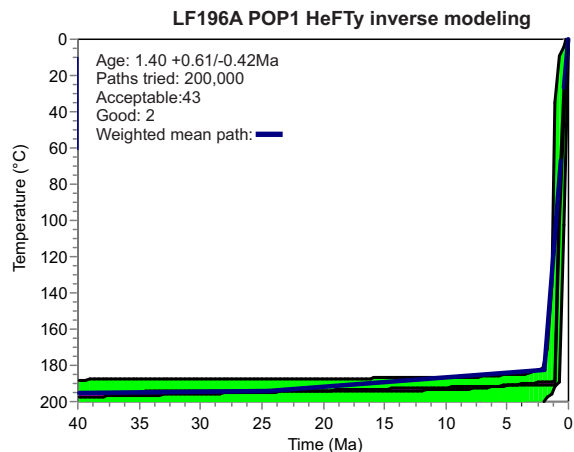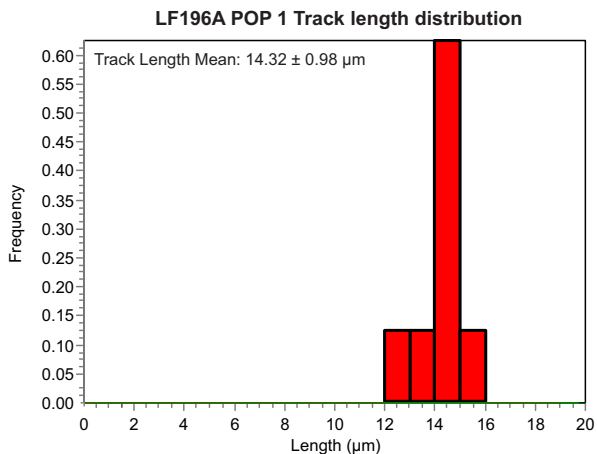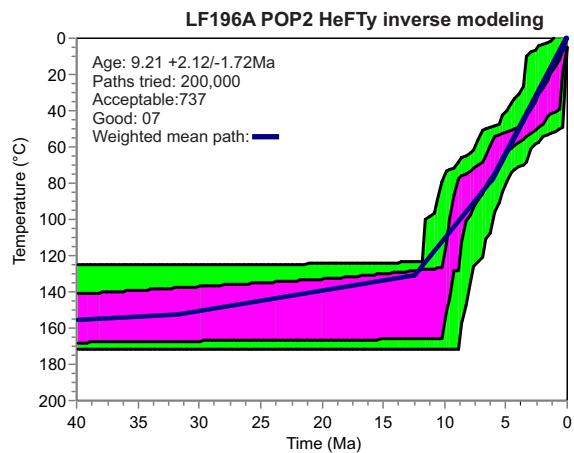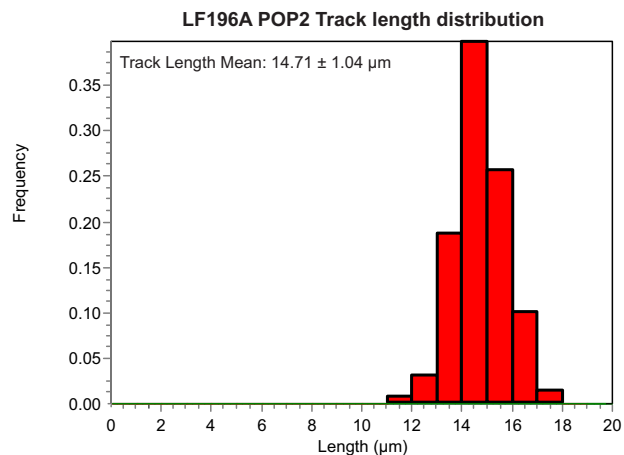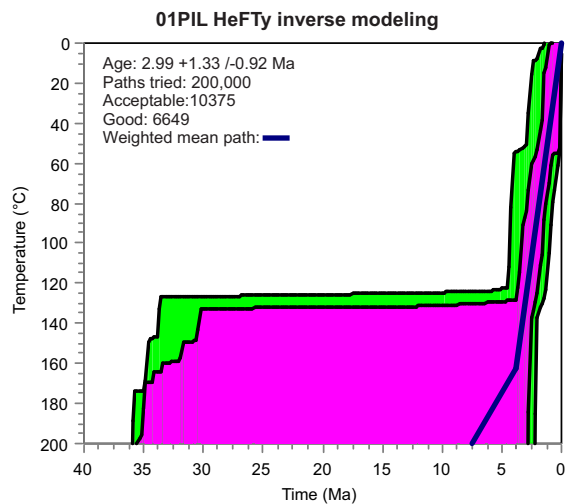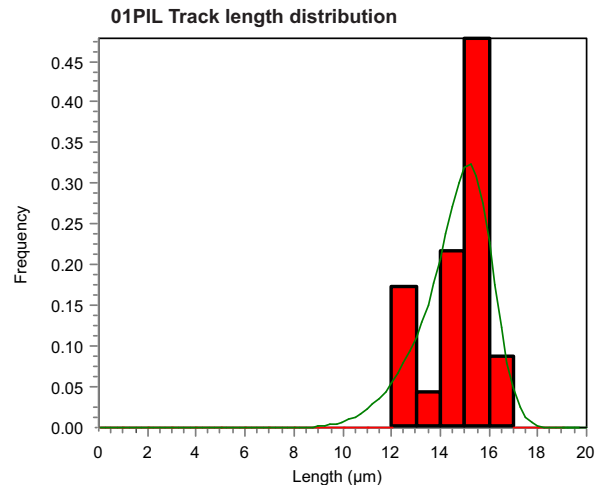

Supplement: Supplementary file 2 [file 2]

mean =  $38.214 \pm 0.092$  | 0.189 | 0.271 Ma (n=25/35)  
MSWD = 2.06,  $p(\chi^2) = 0.0017$

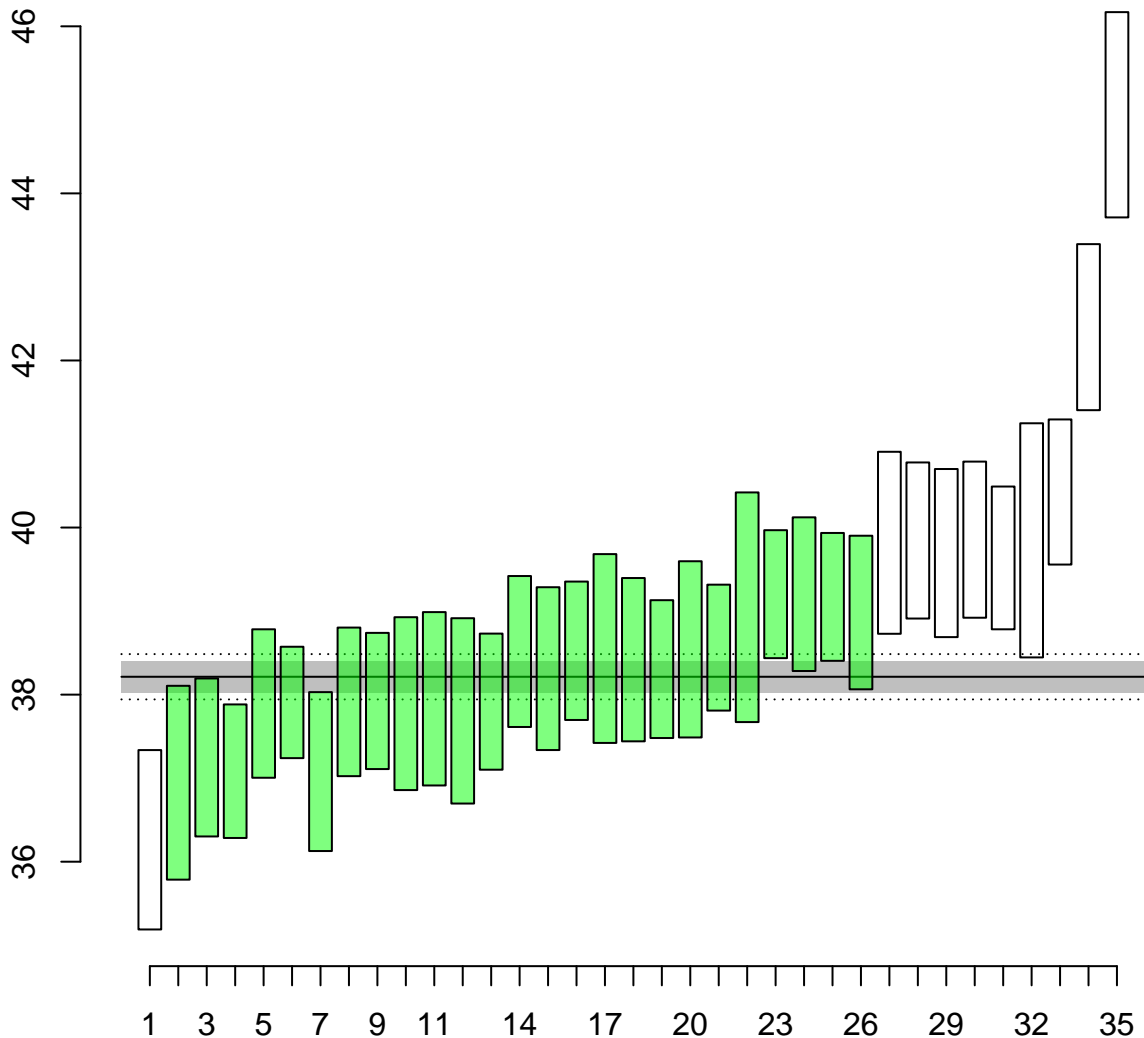

Supplement: Supplementary file 3 [file 2]

mean =  $33.52 \pm 0.12$  | 0.25 | 0.34 Ma (n=26/35)  
 MSWD = 1.79,  $p(\chi^2) = 0.0090$

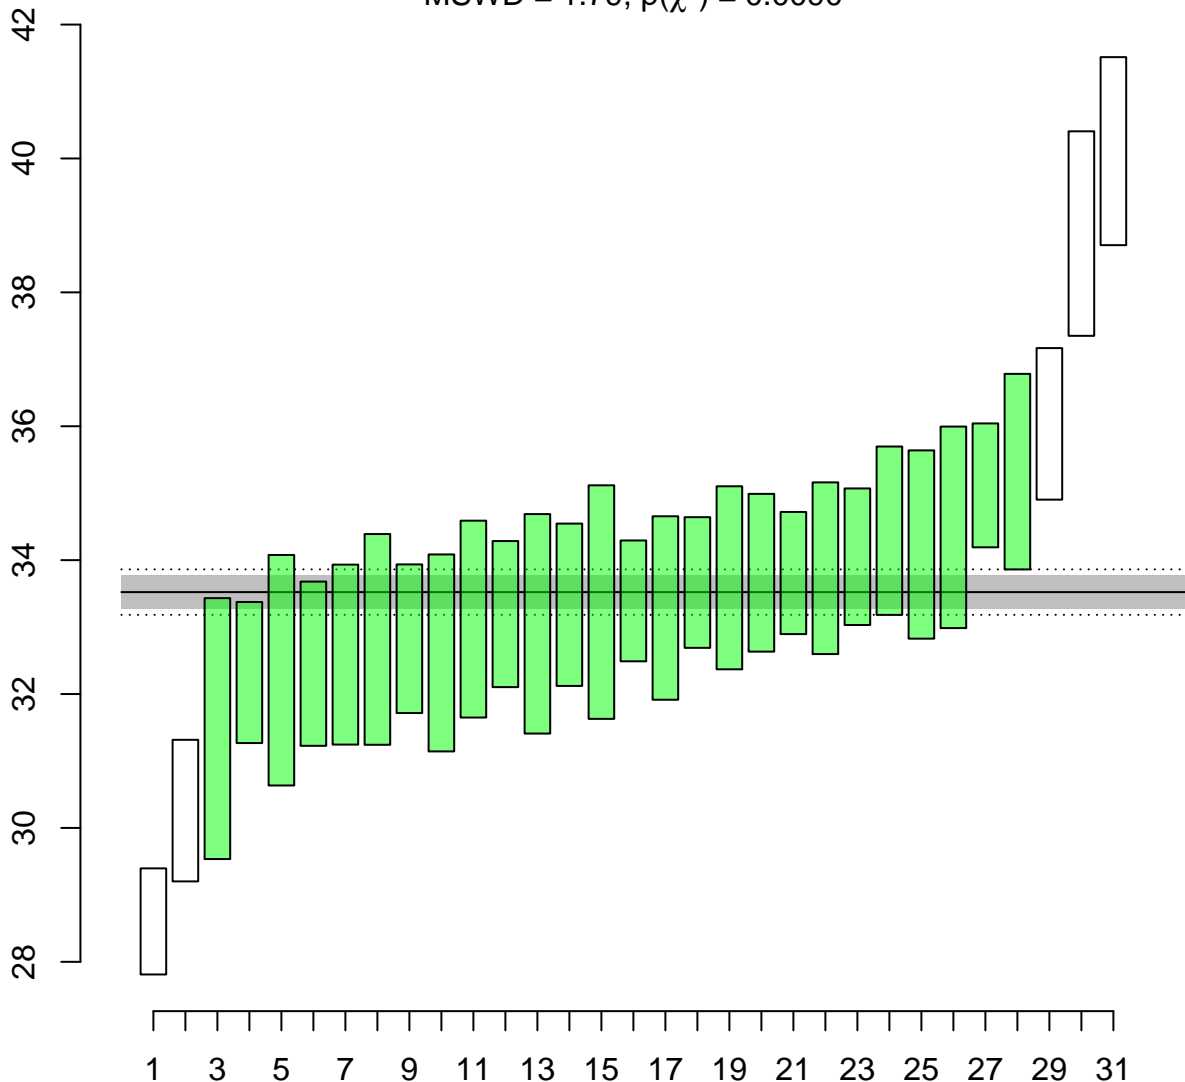

Supplement: Supplementary file 4 [file 2]

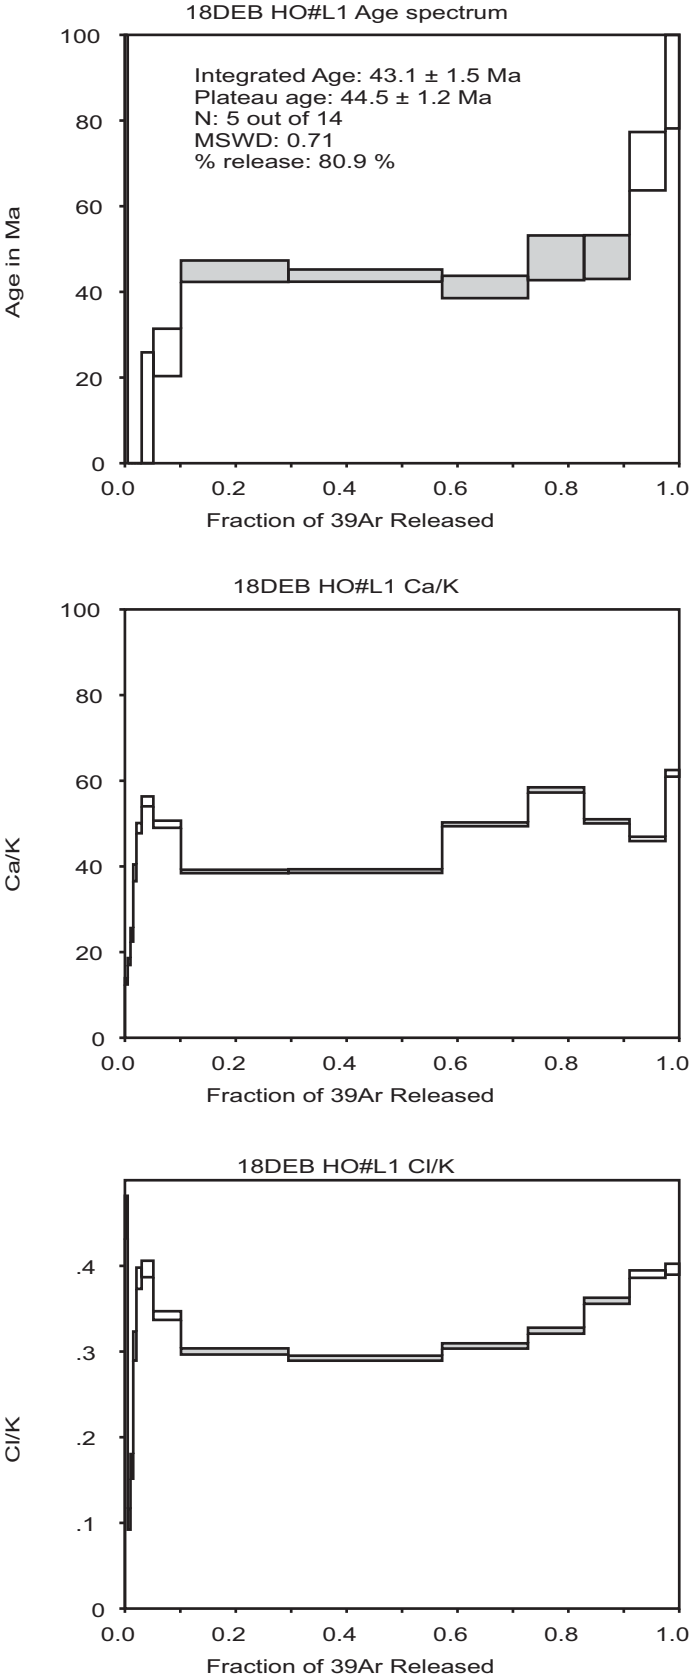

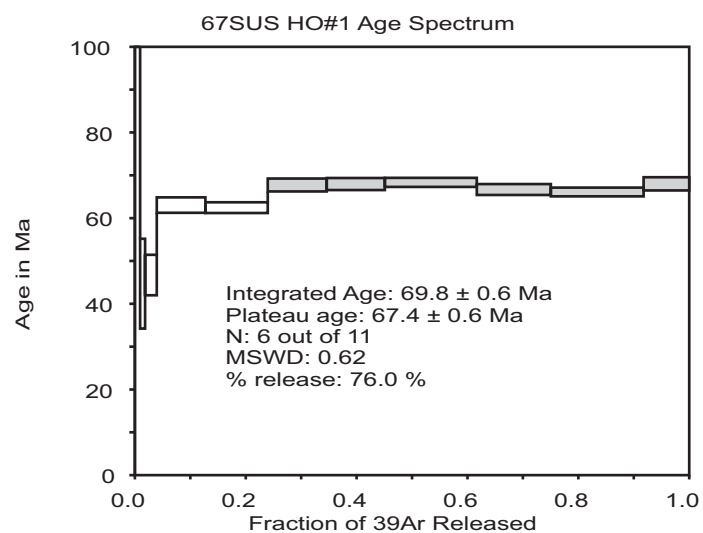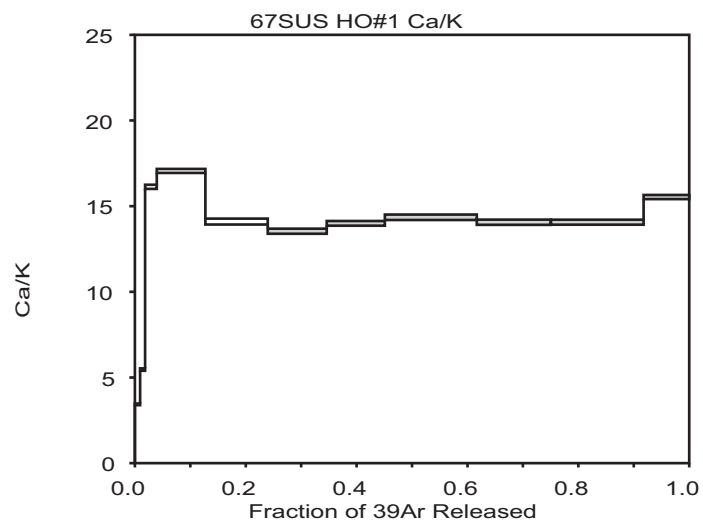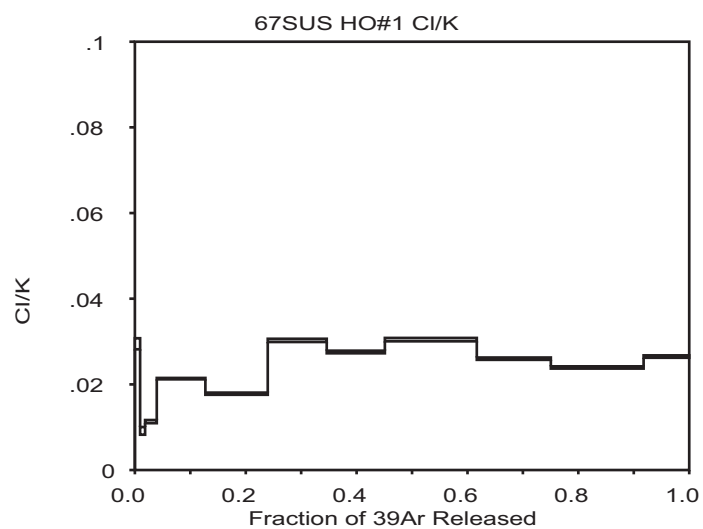

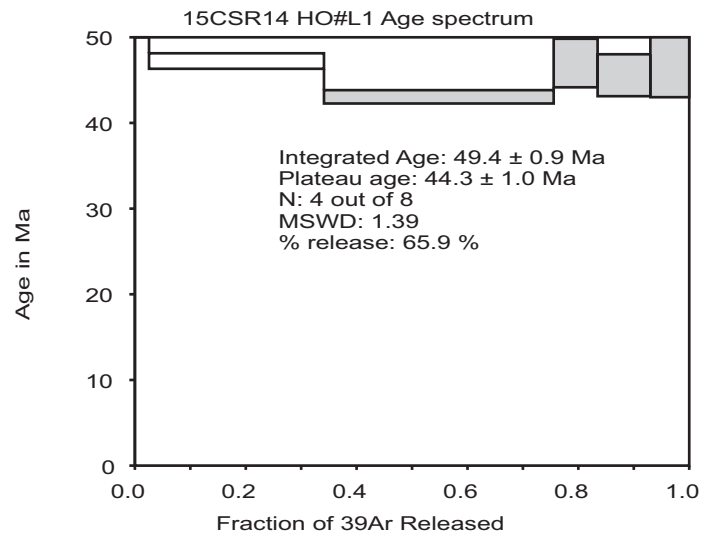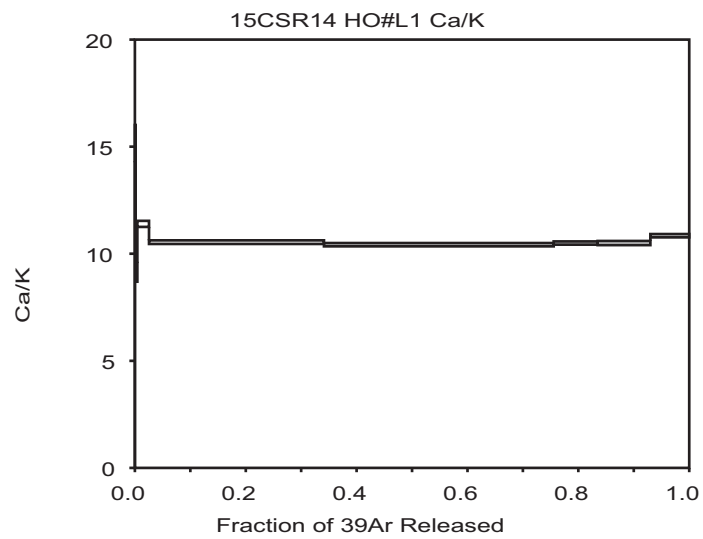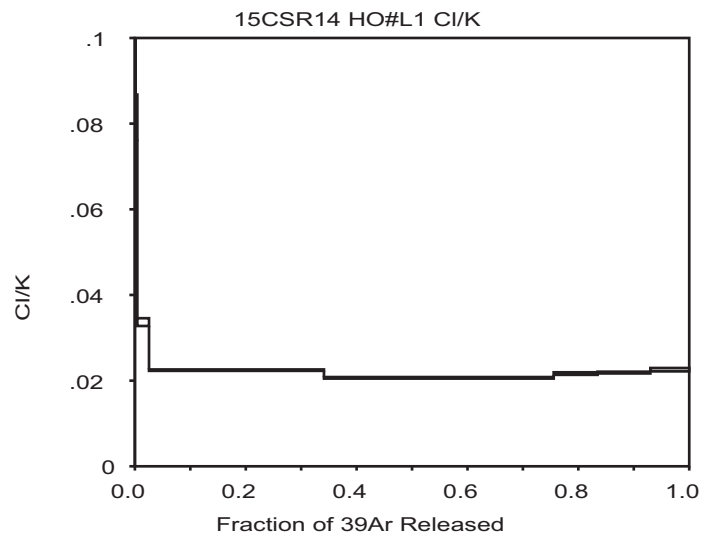

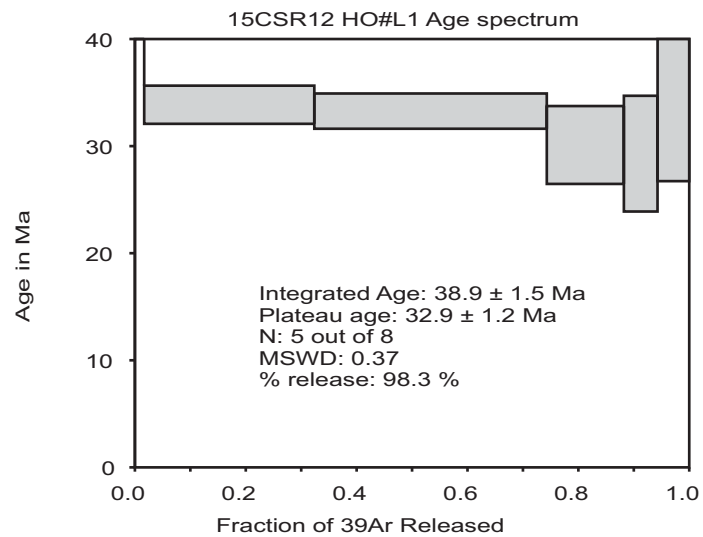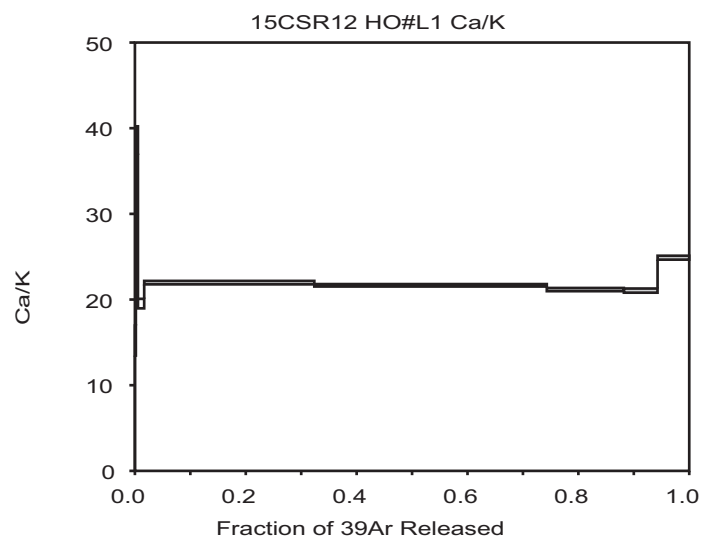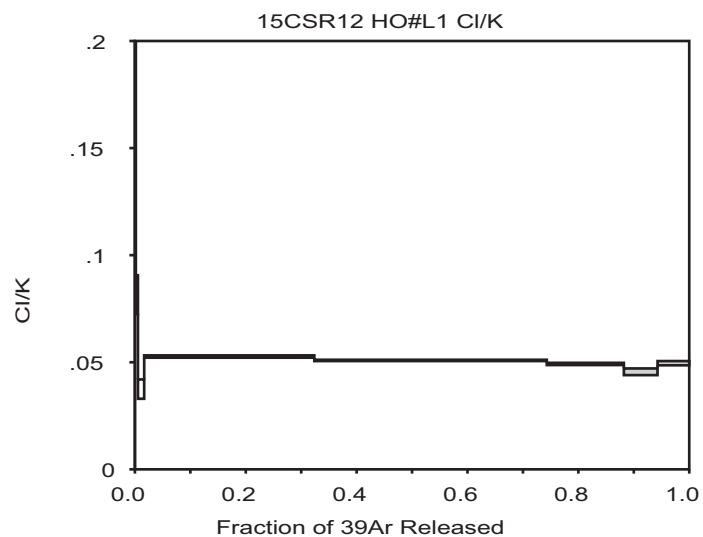

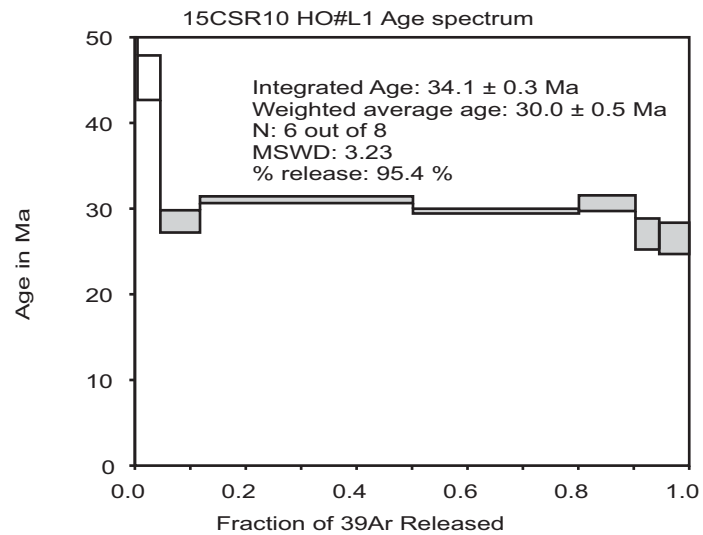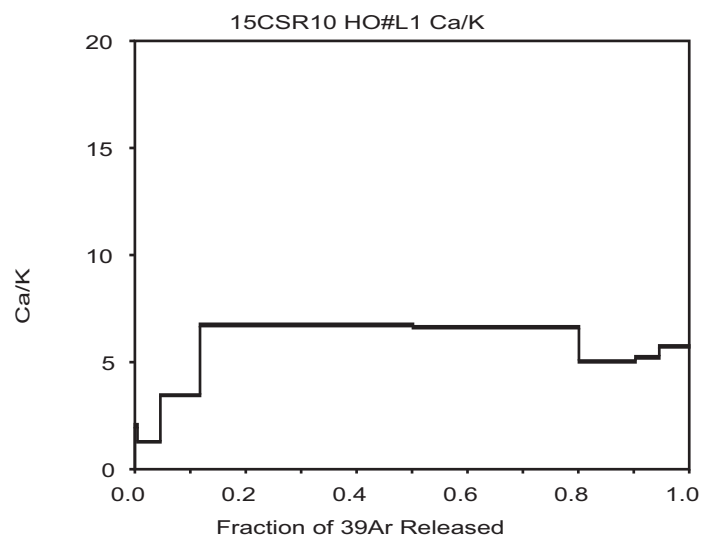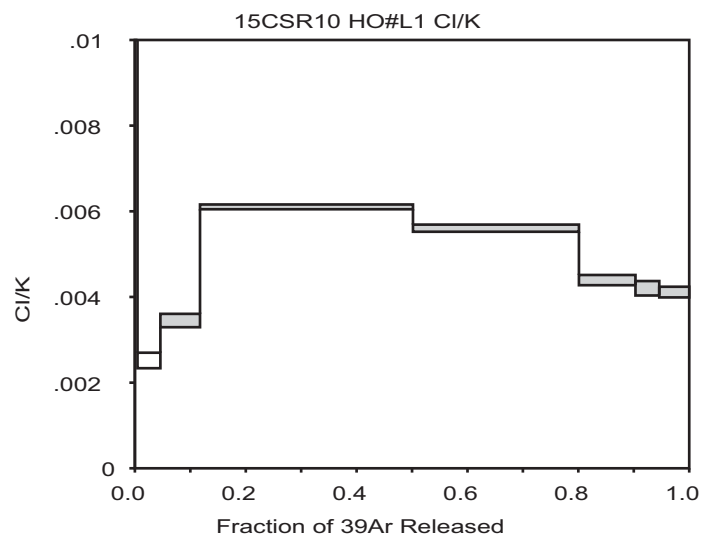

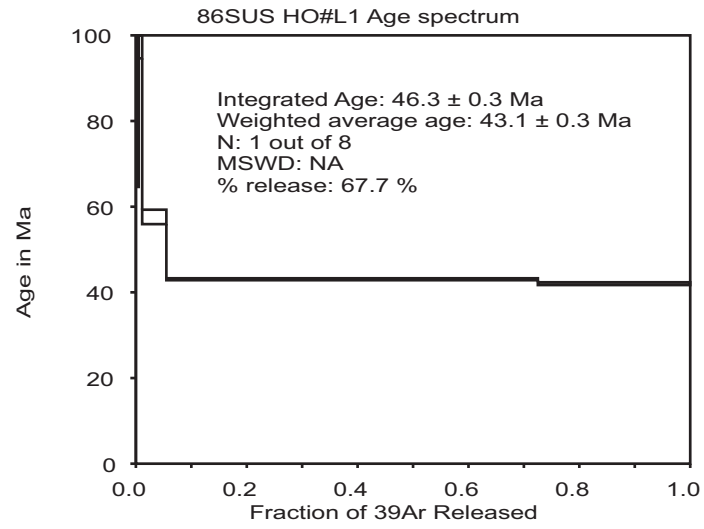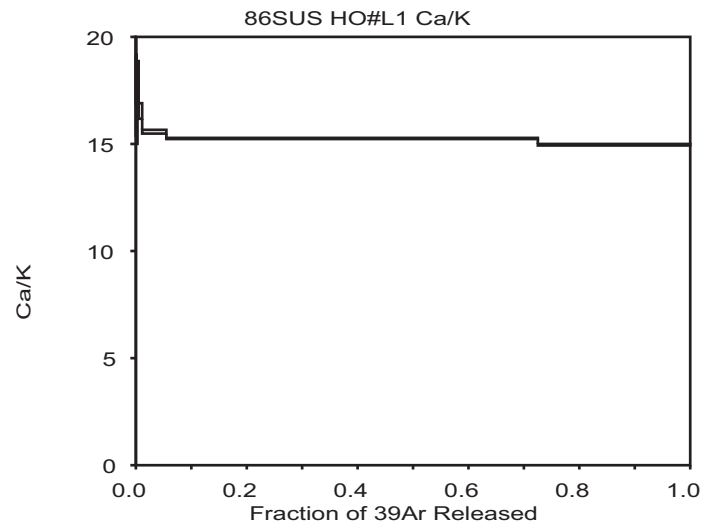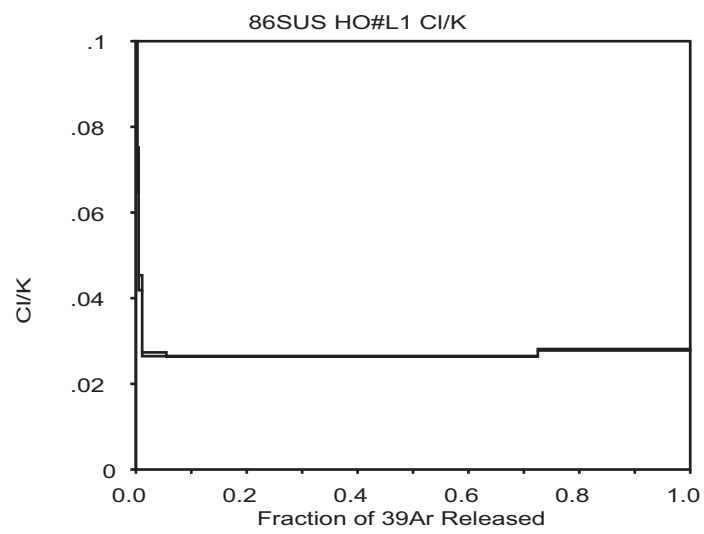

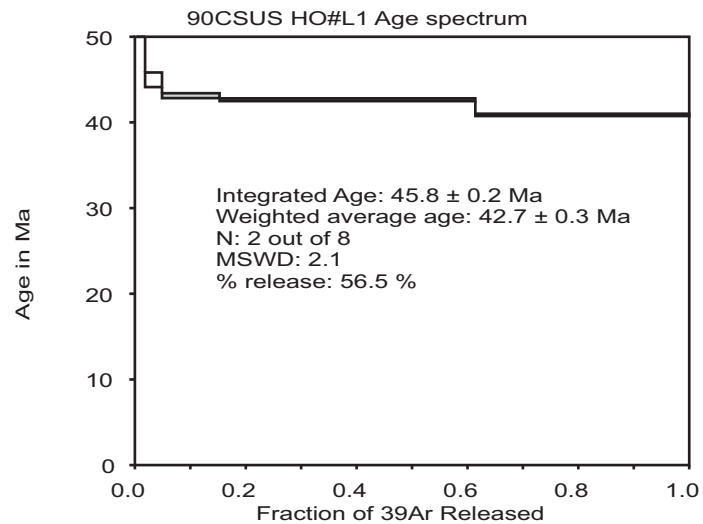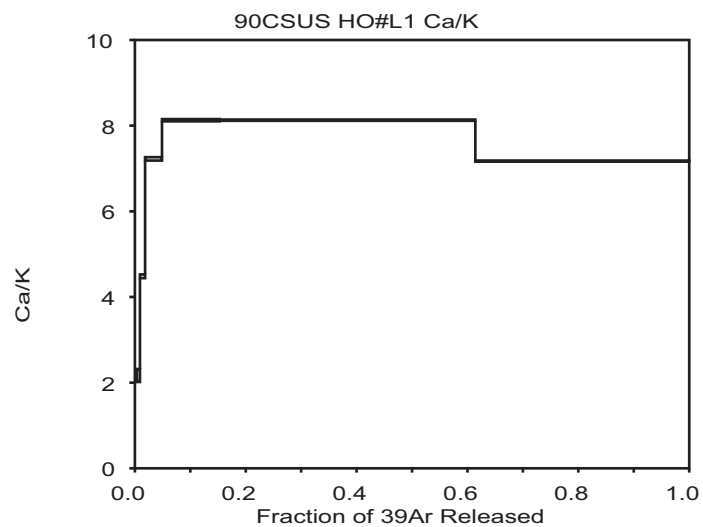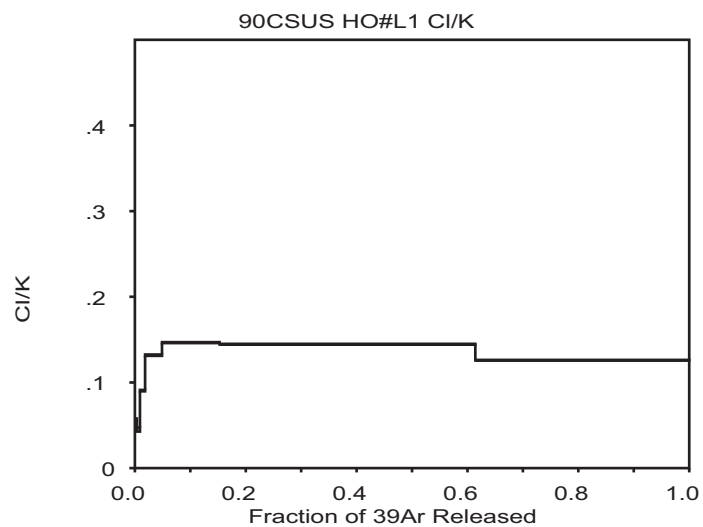

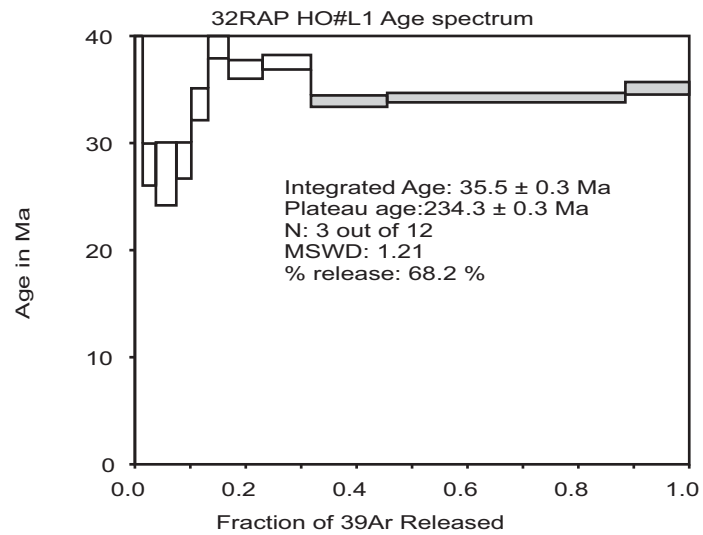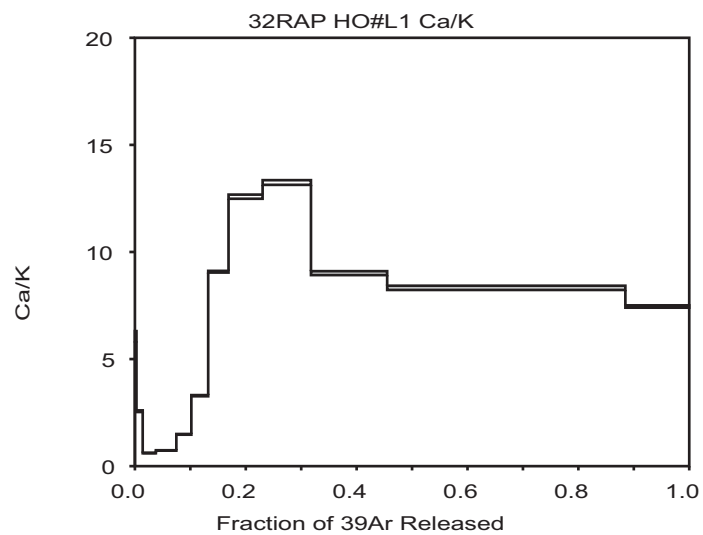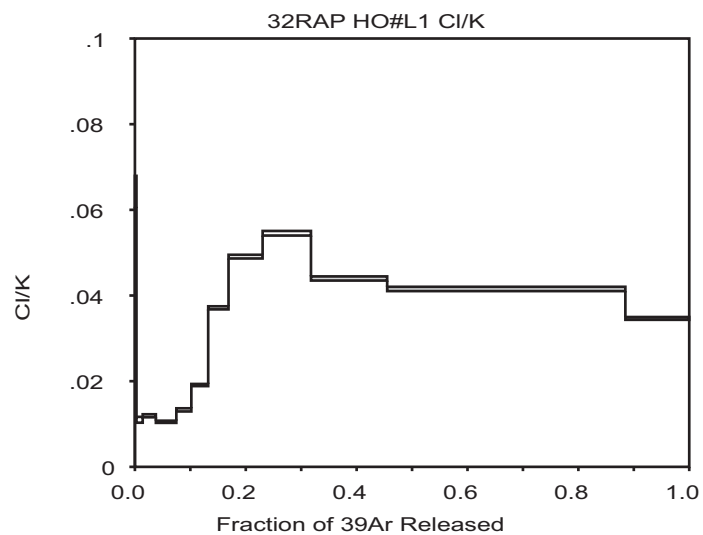



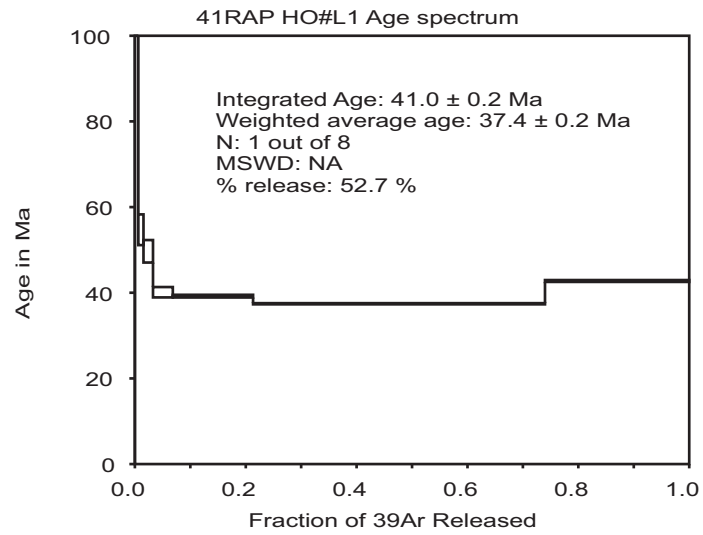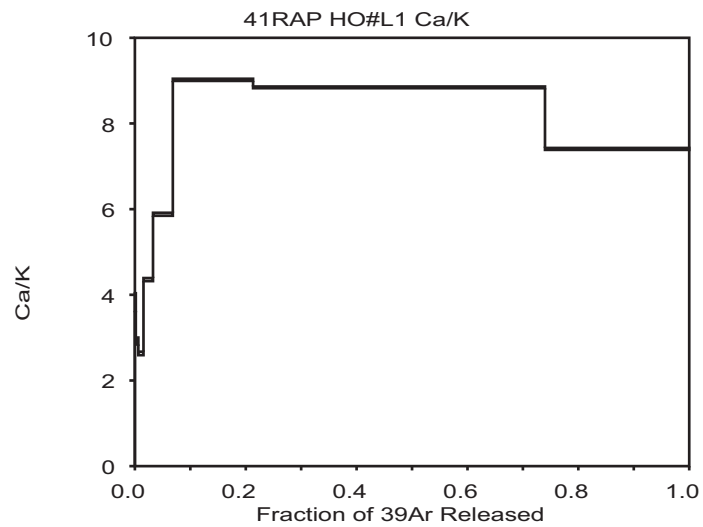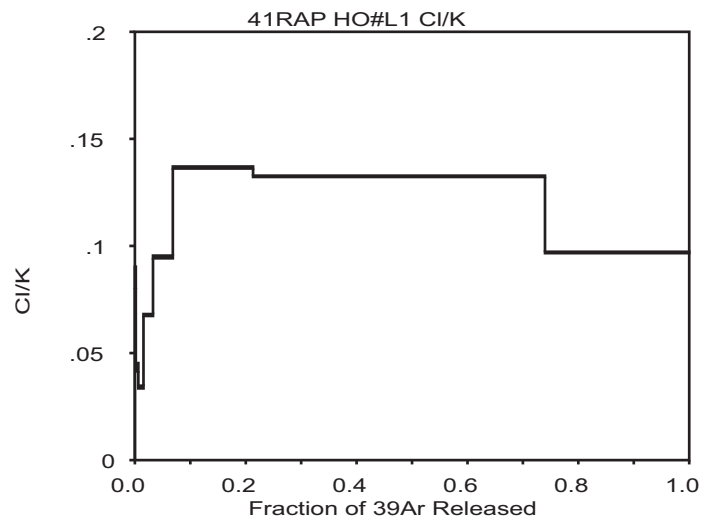

Supplement: Supplementary file 5 [file 2]

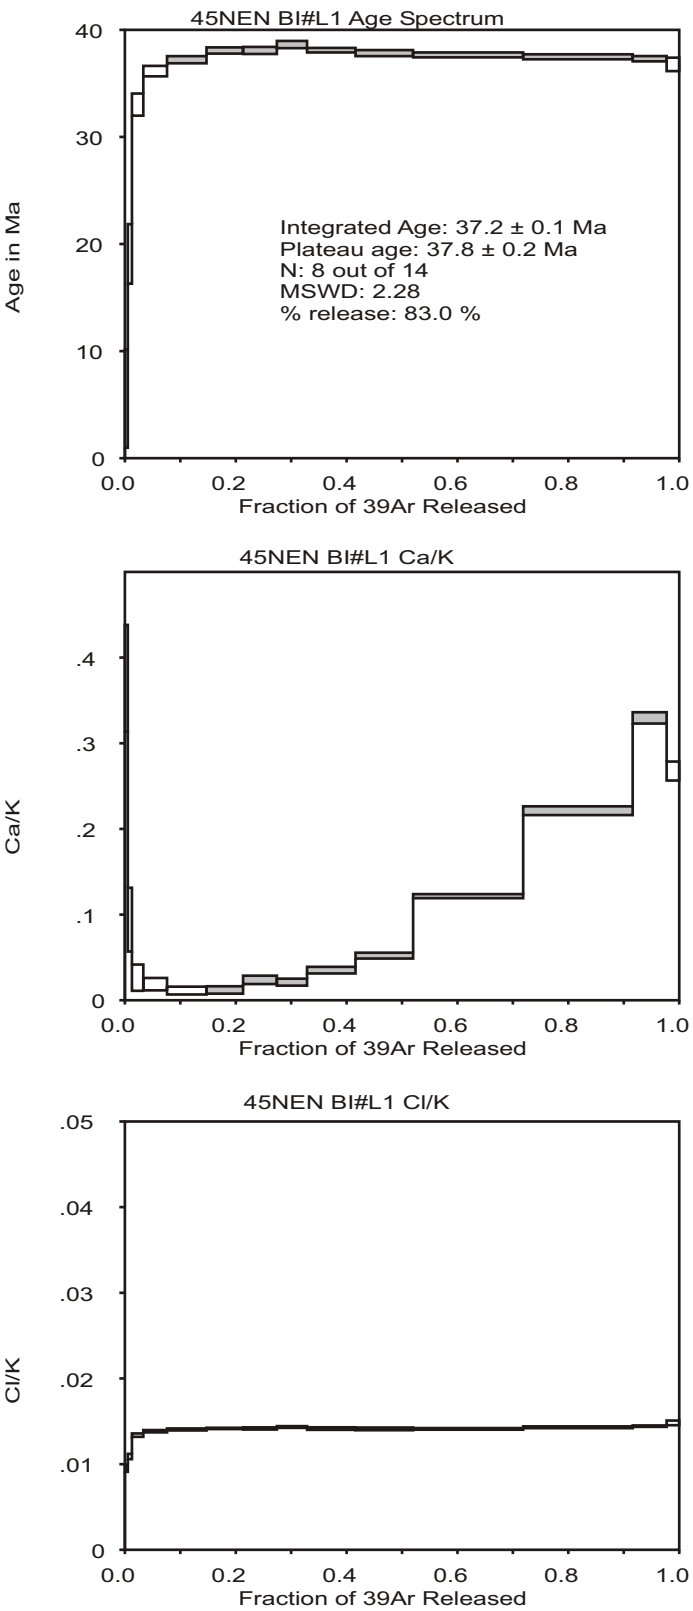

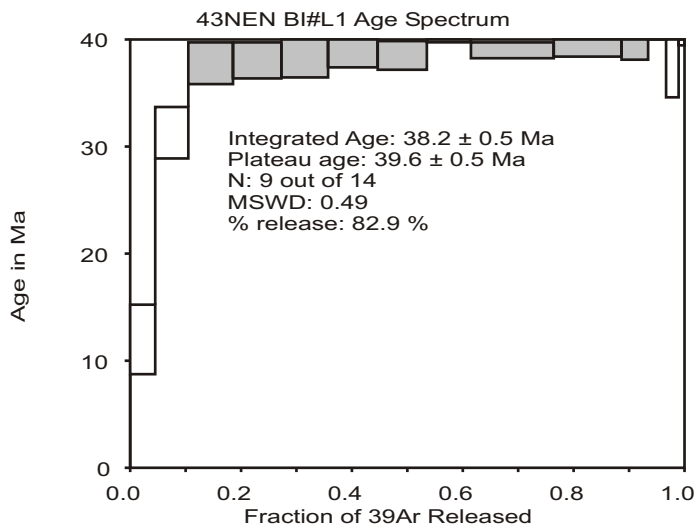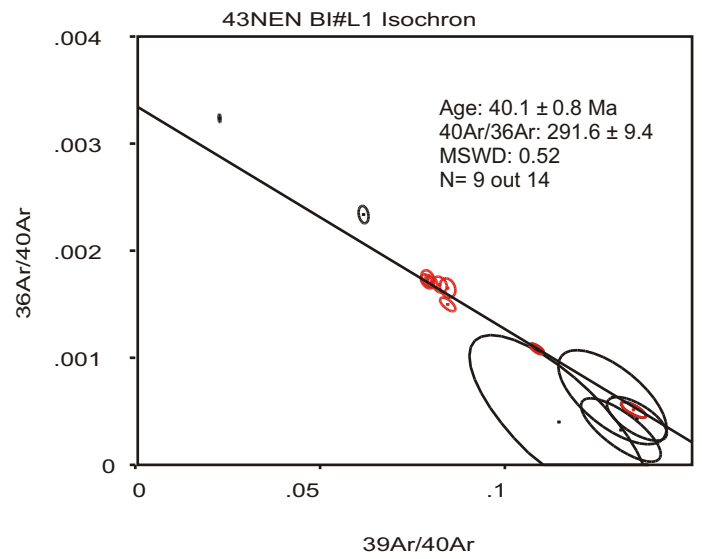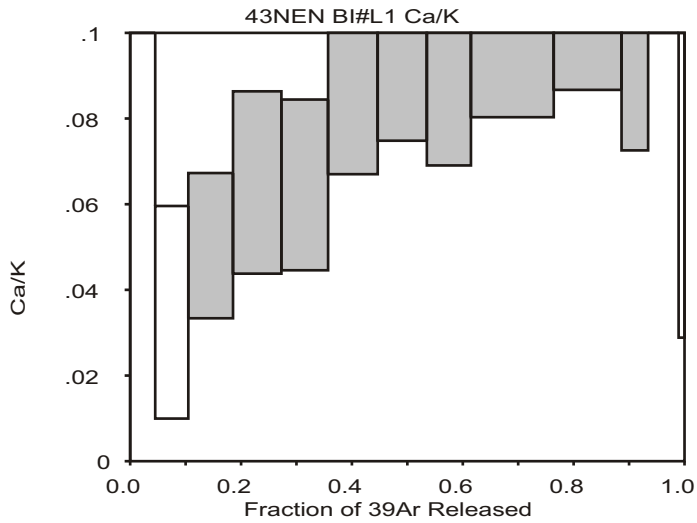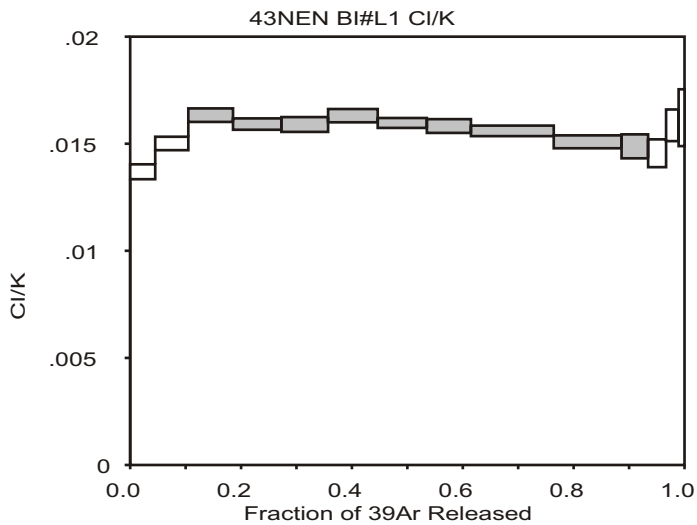

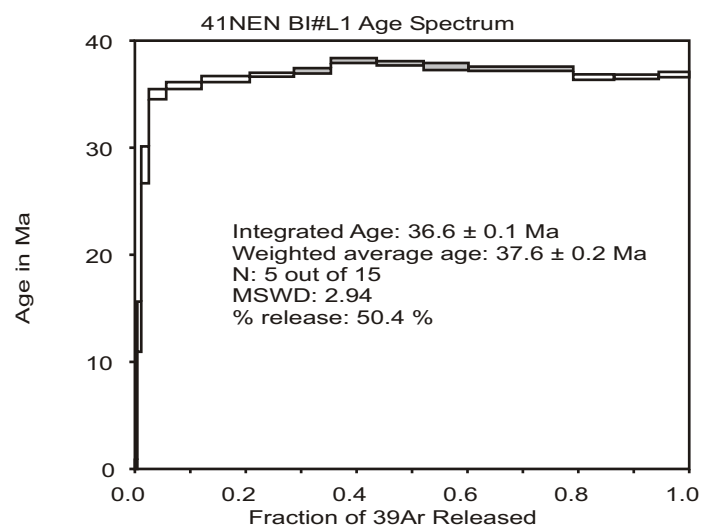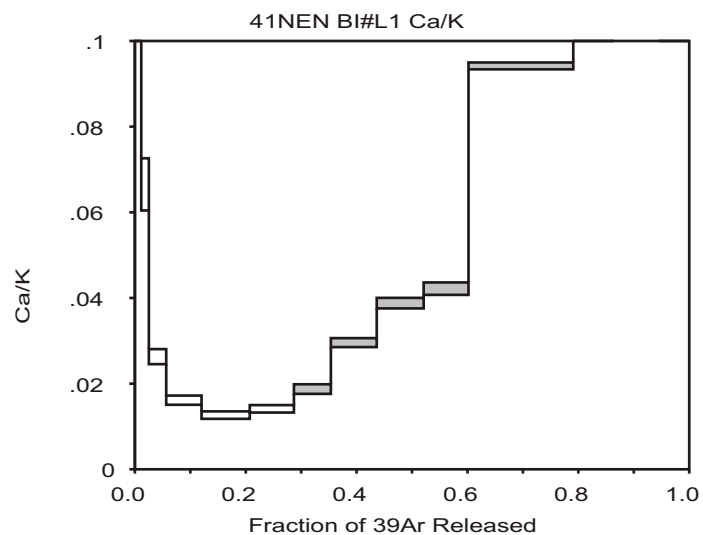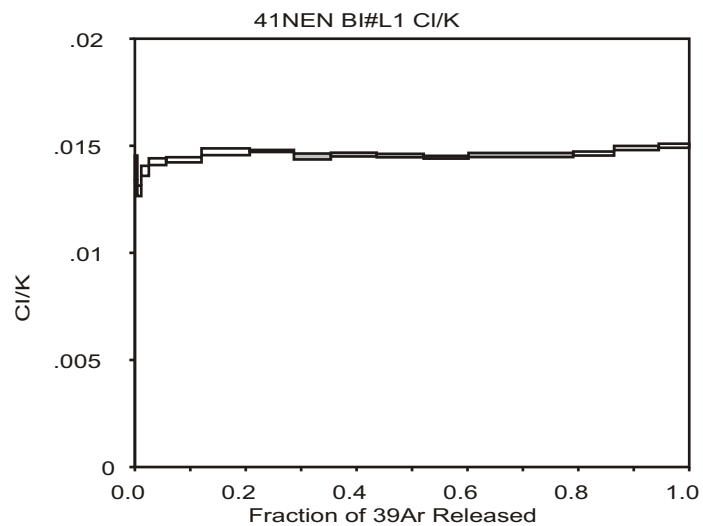

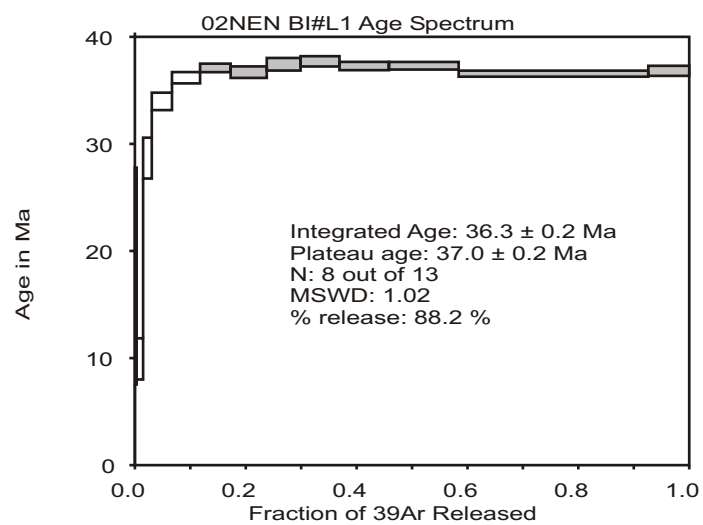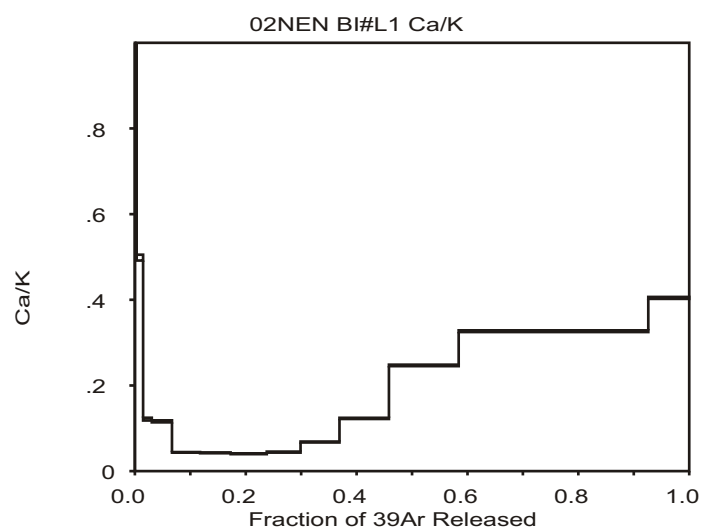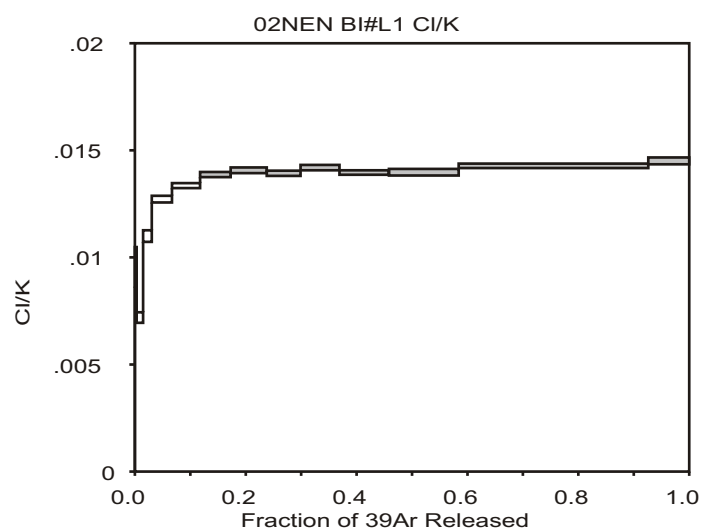

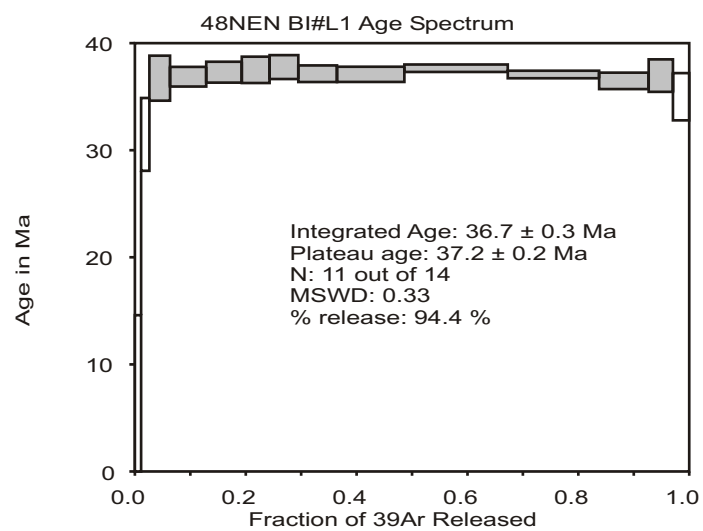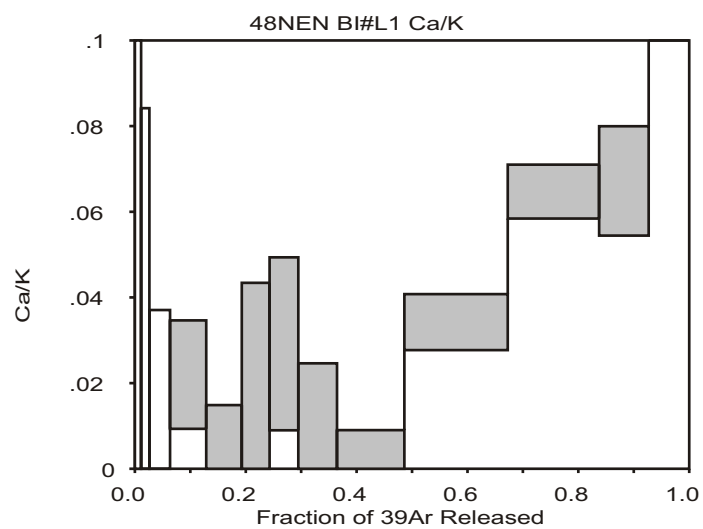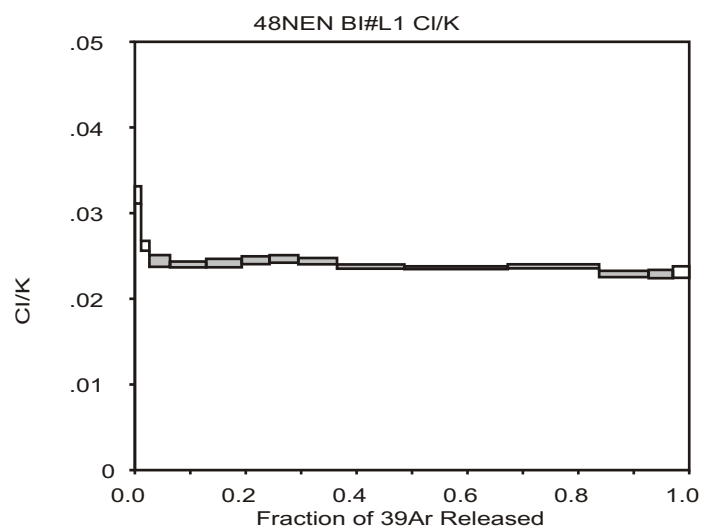

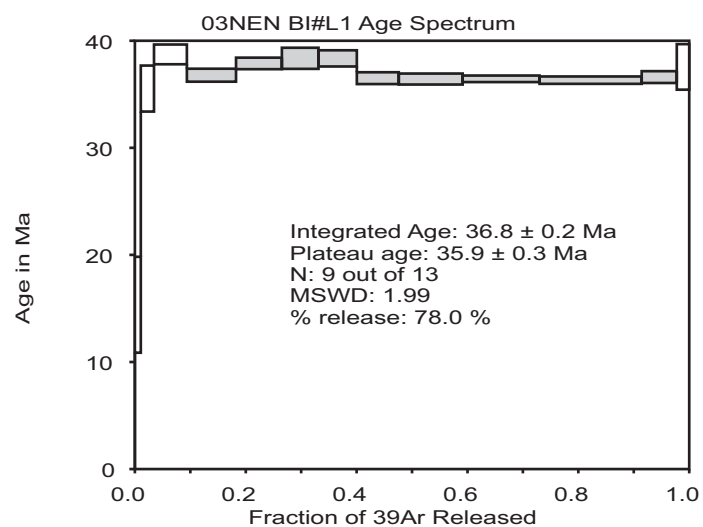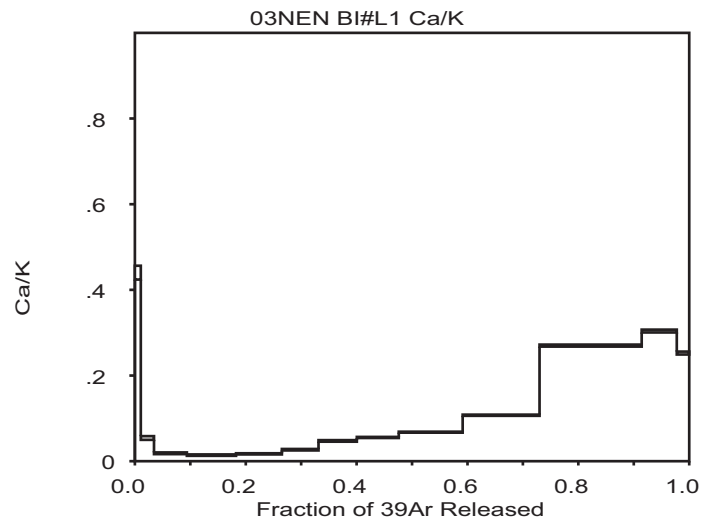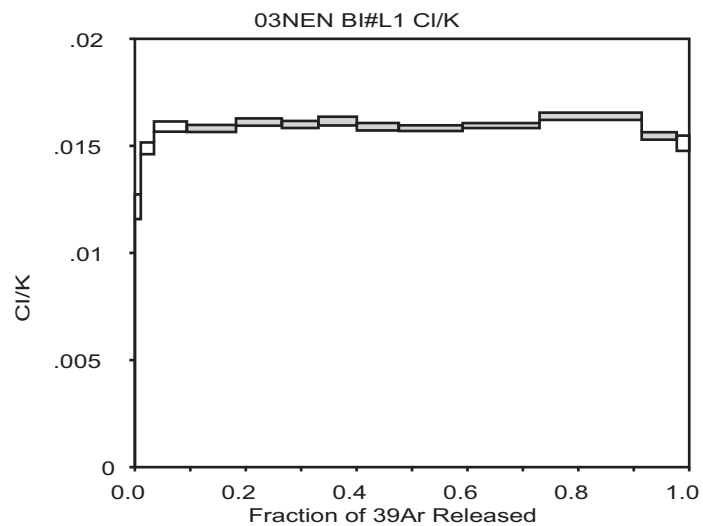

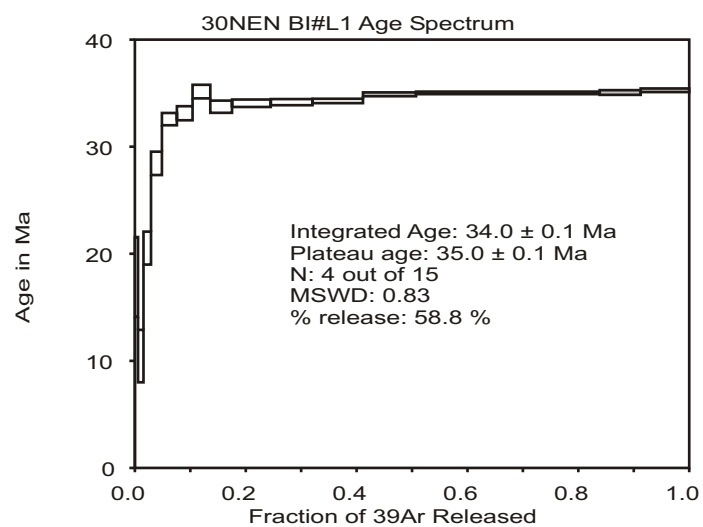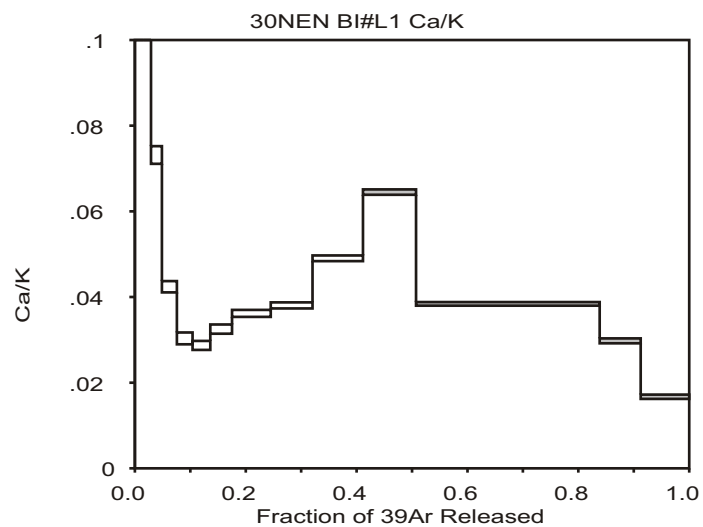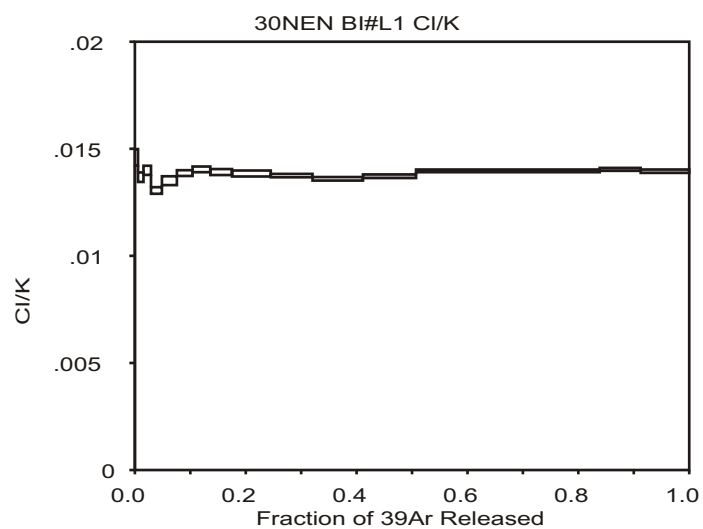

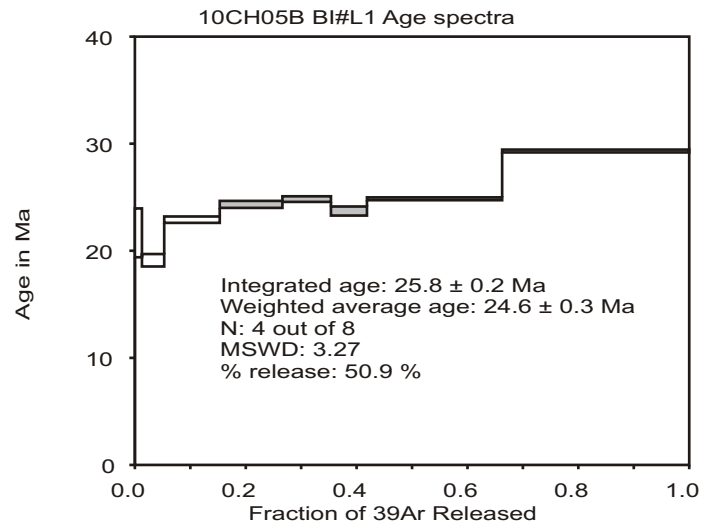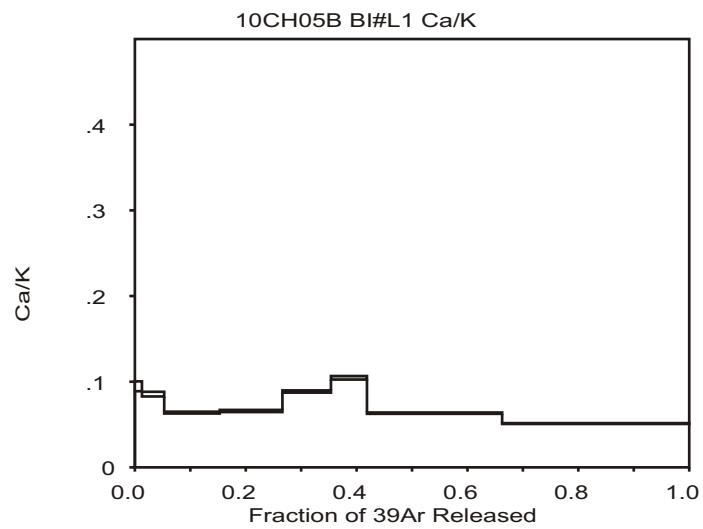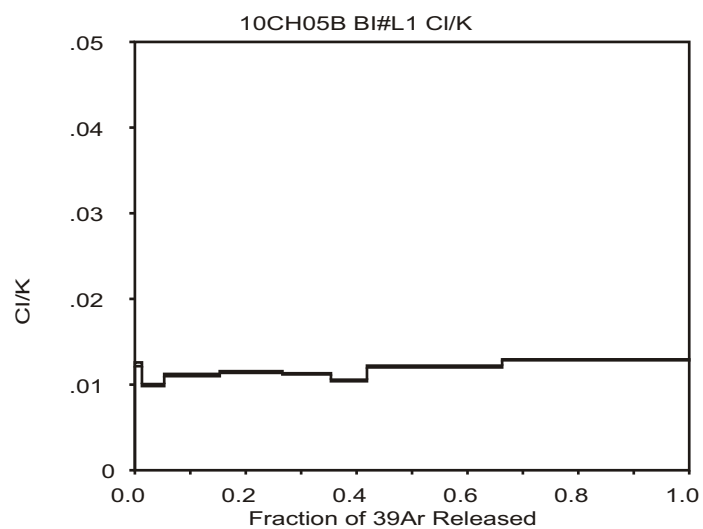



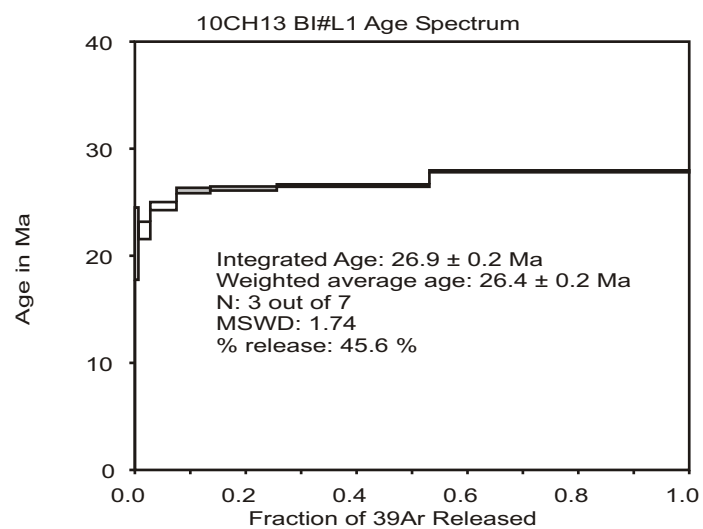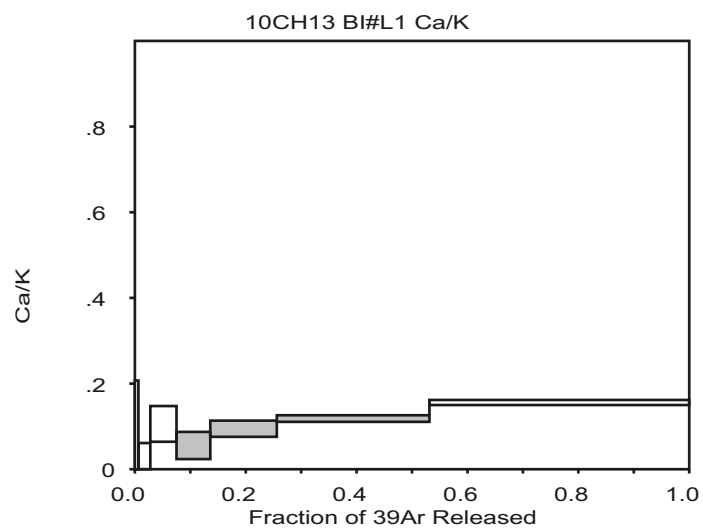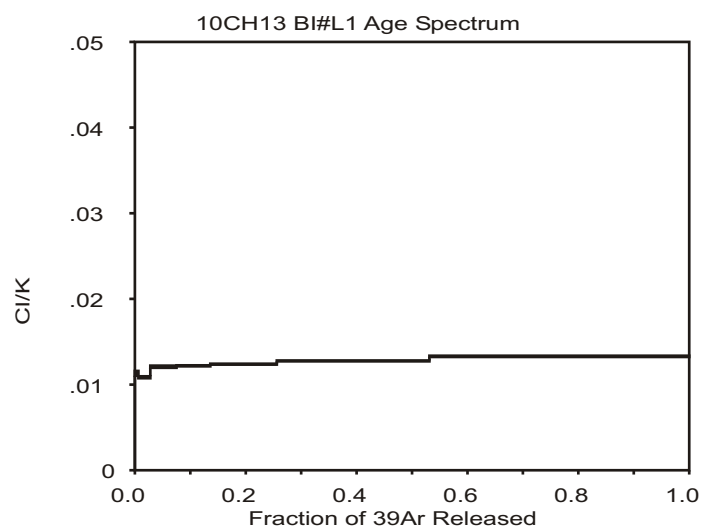

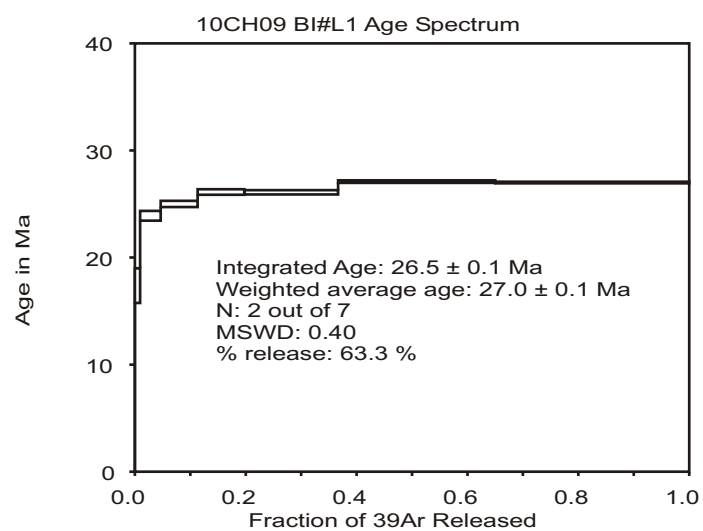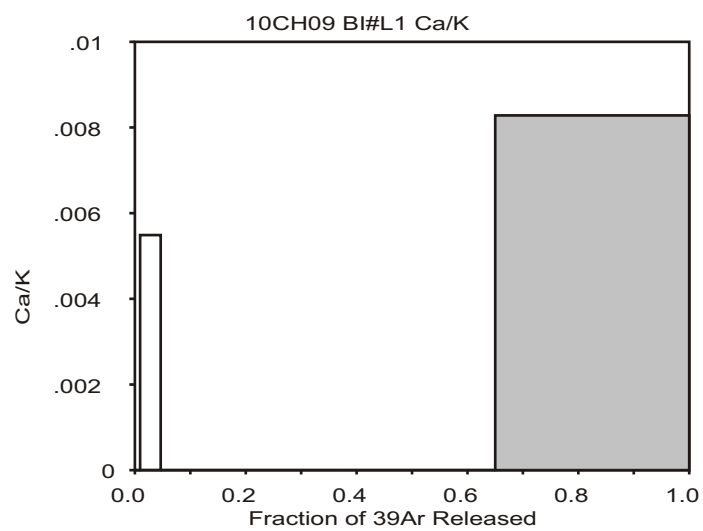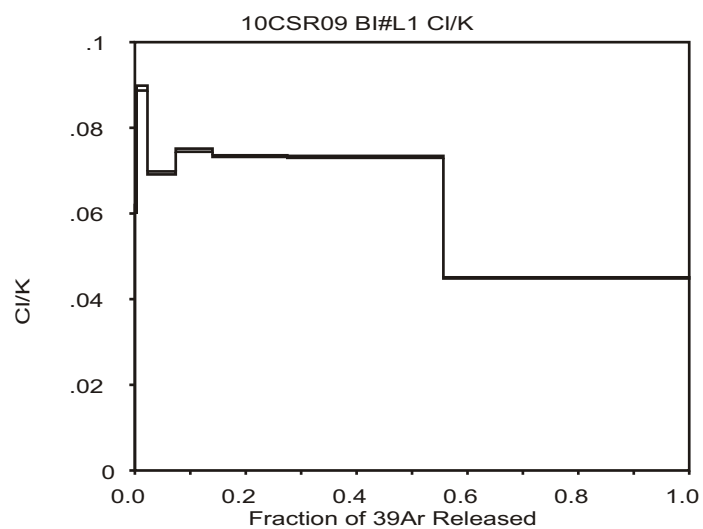

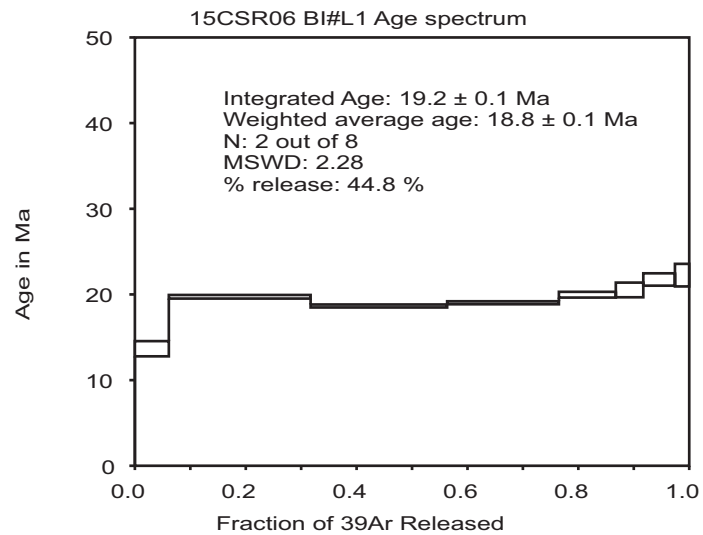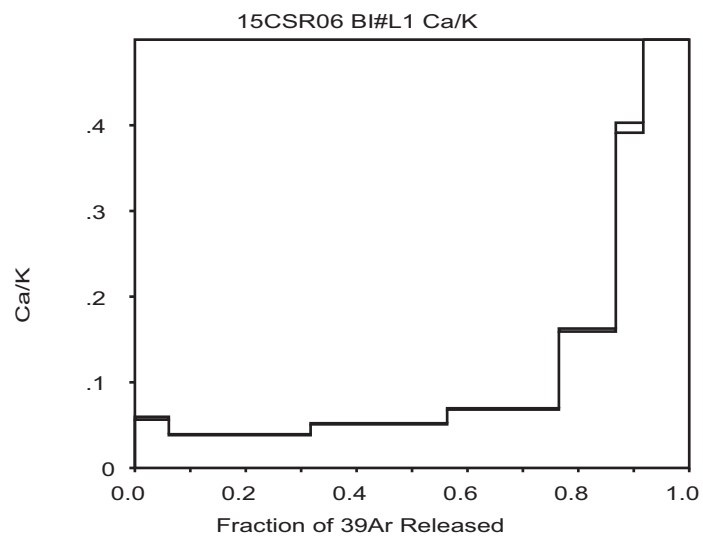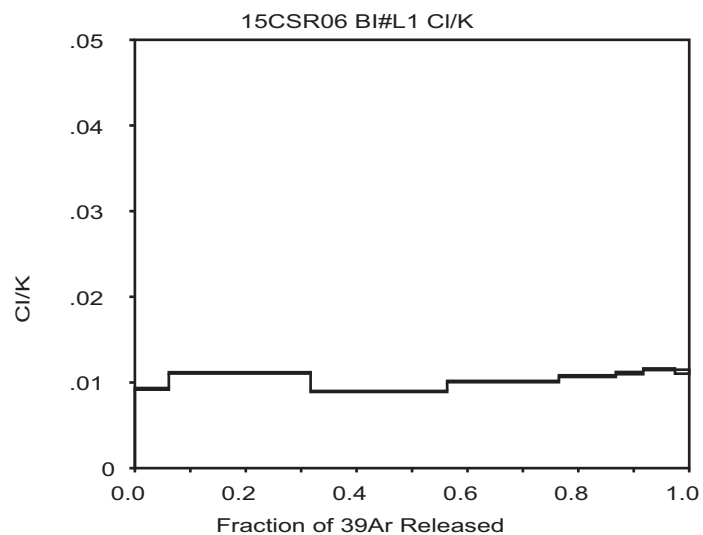

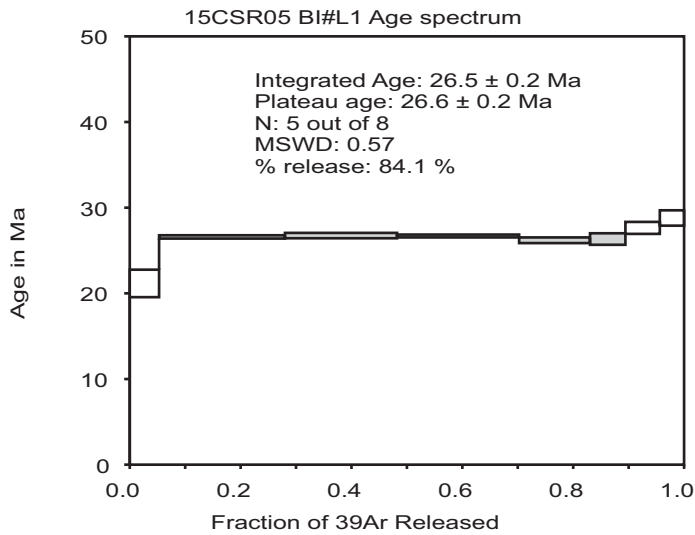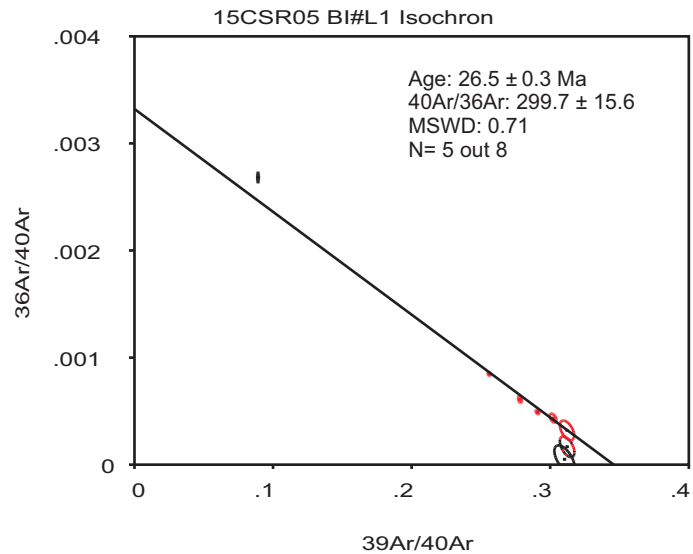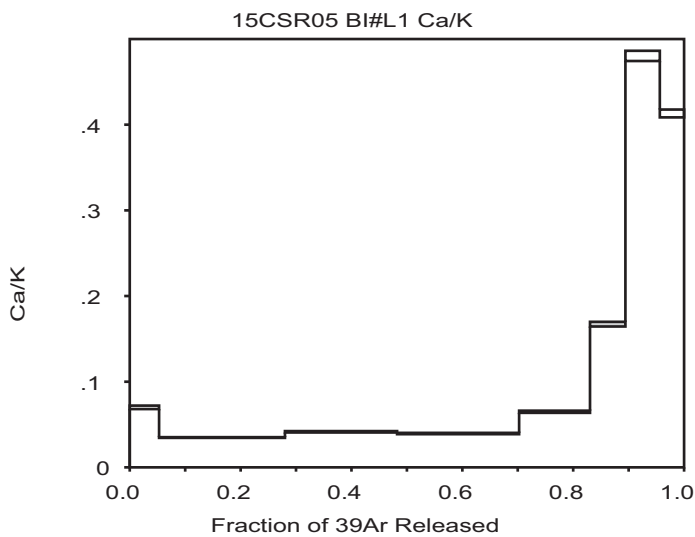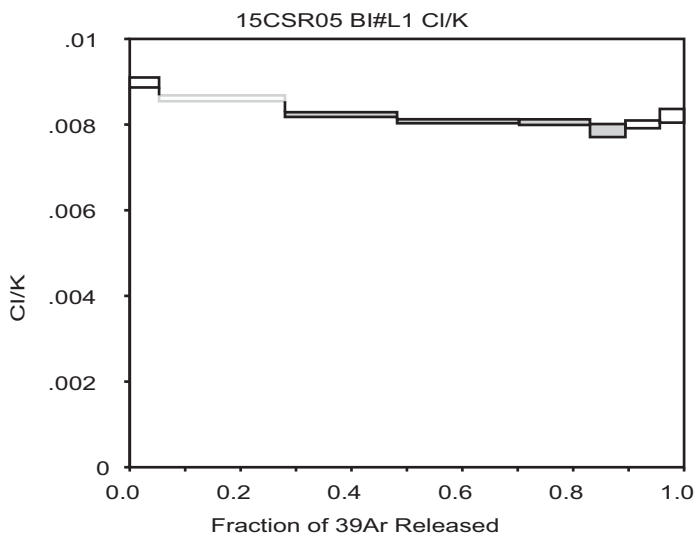

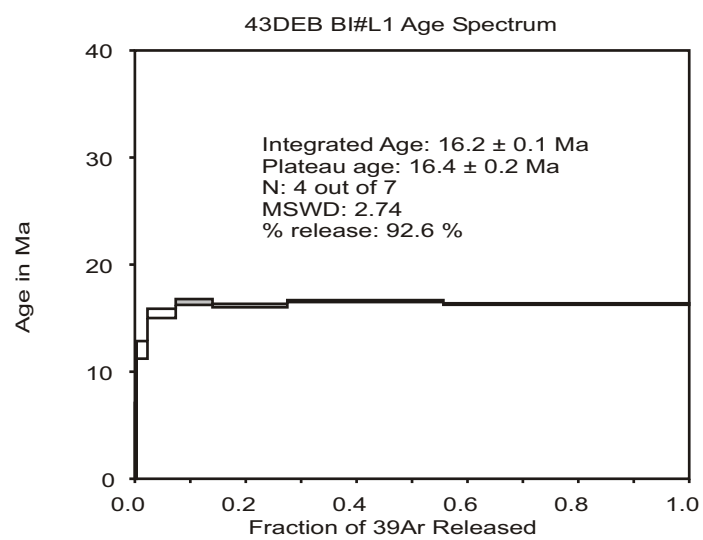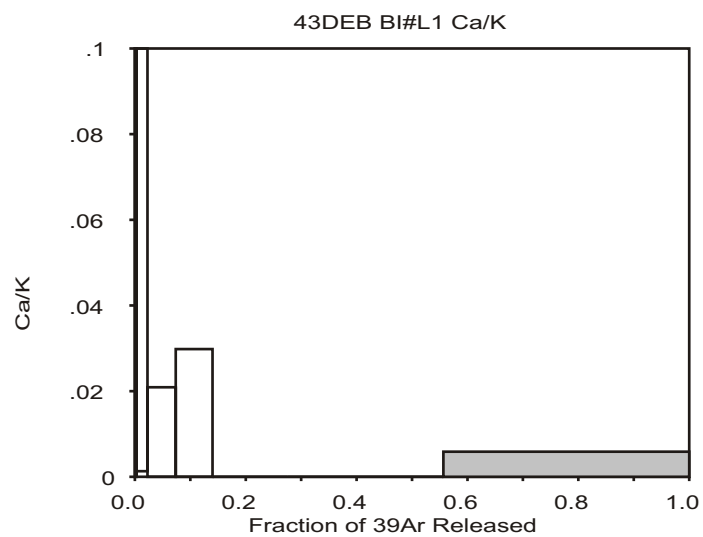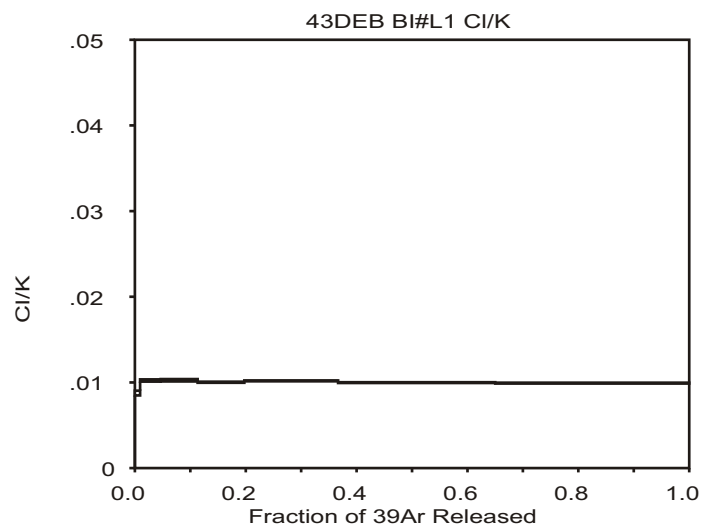

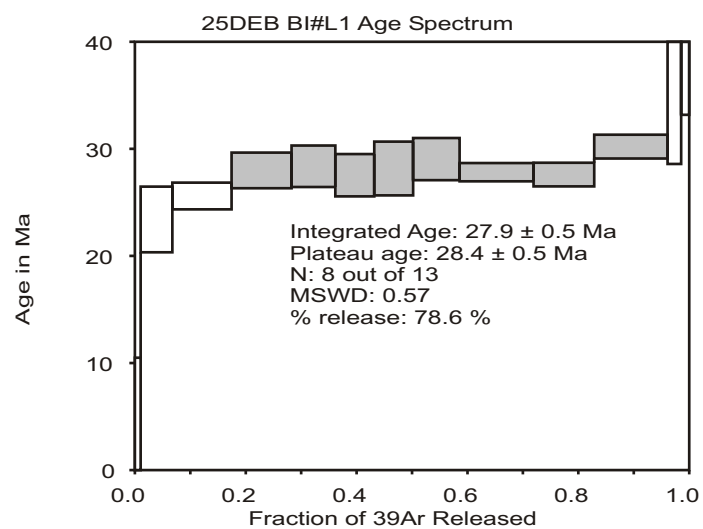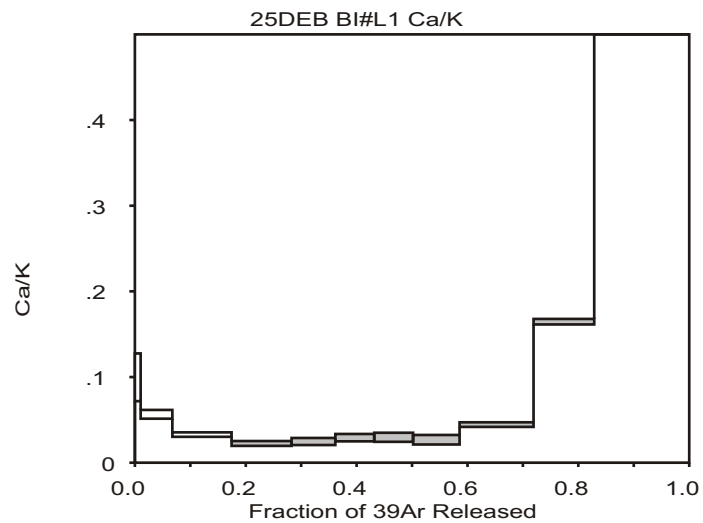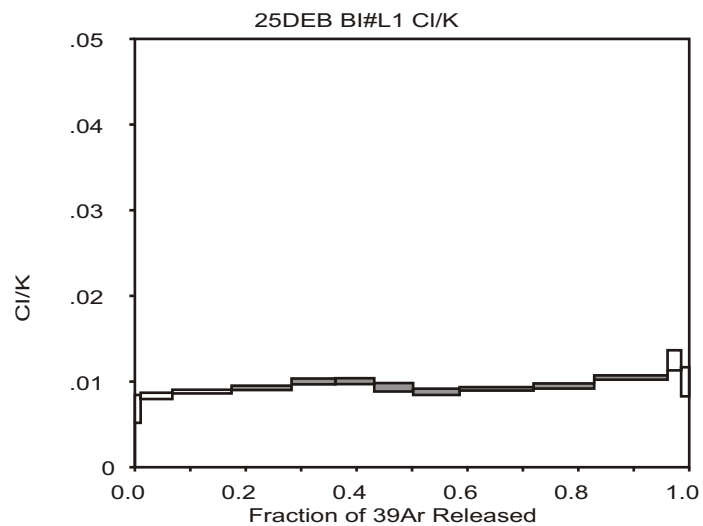

## 22DEB BI#L1 Single grain fusions

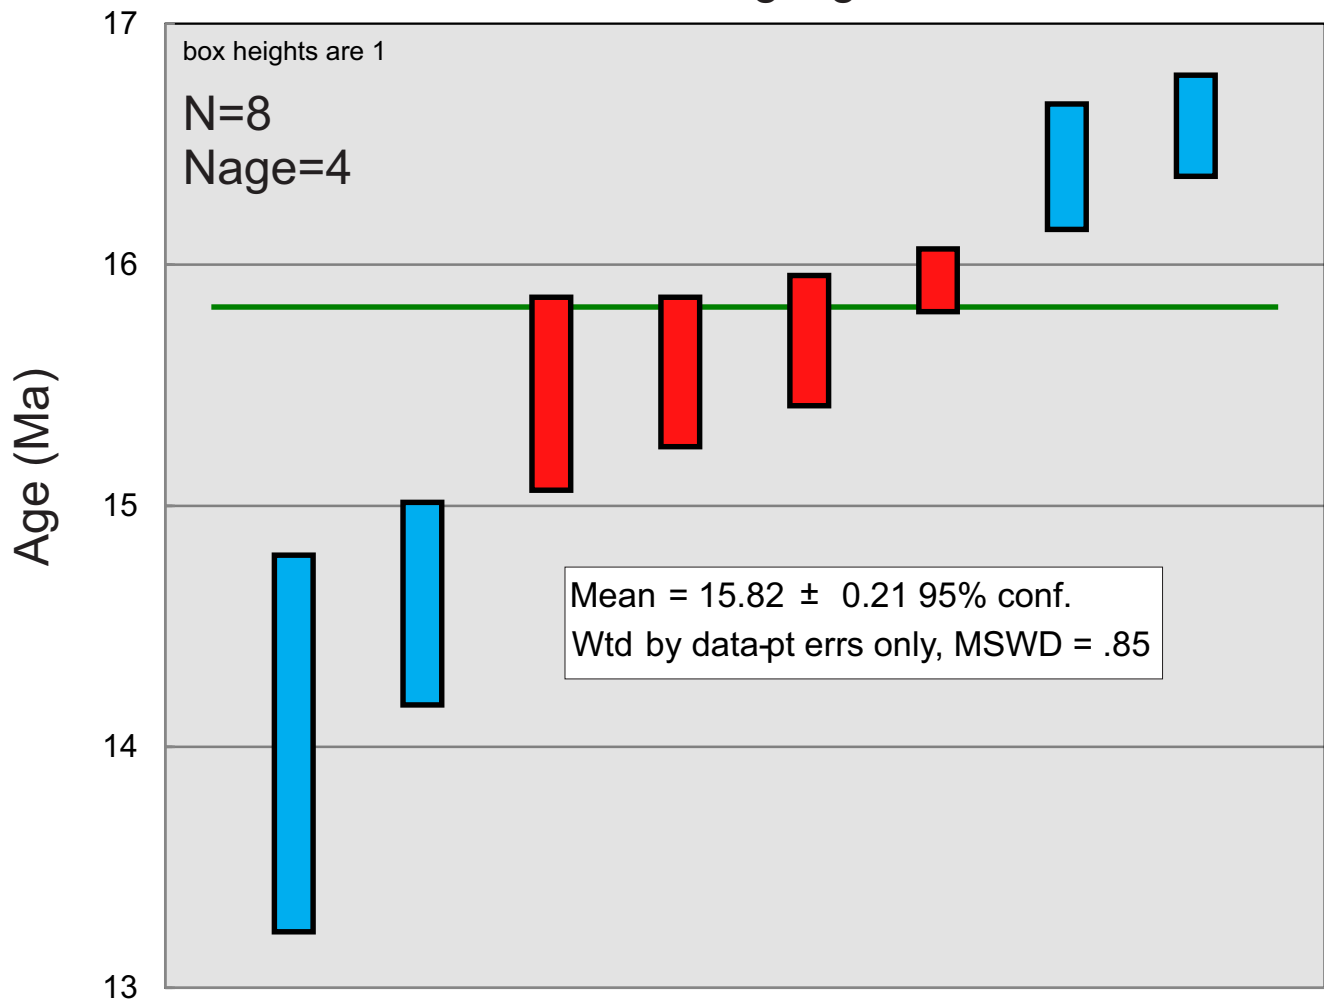

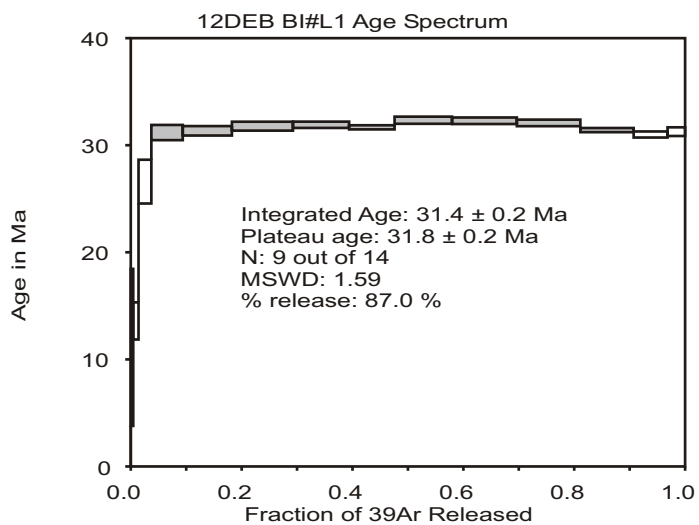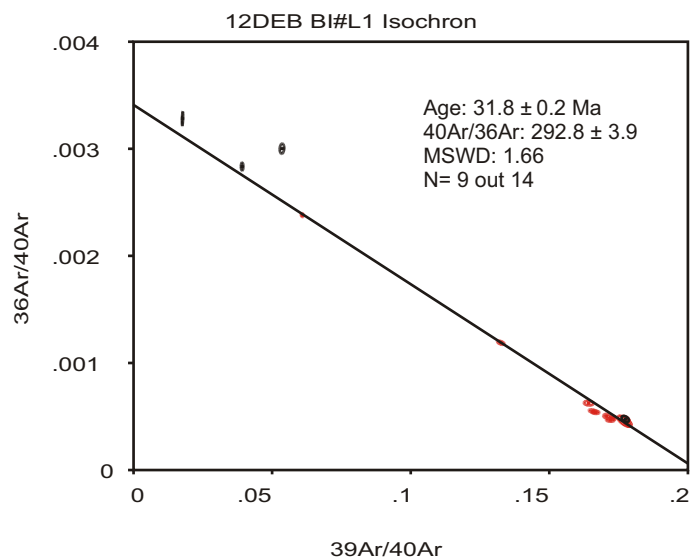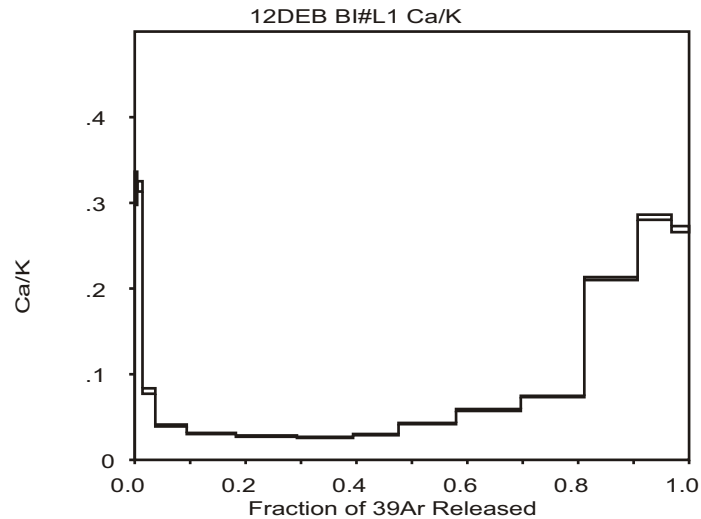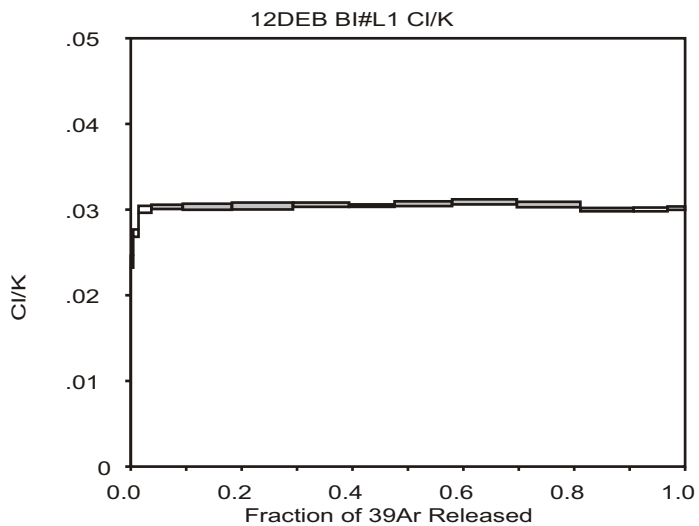



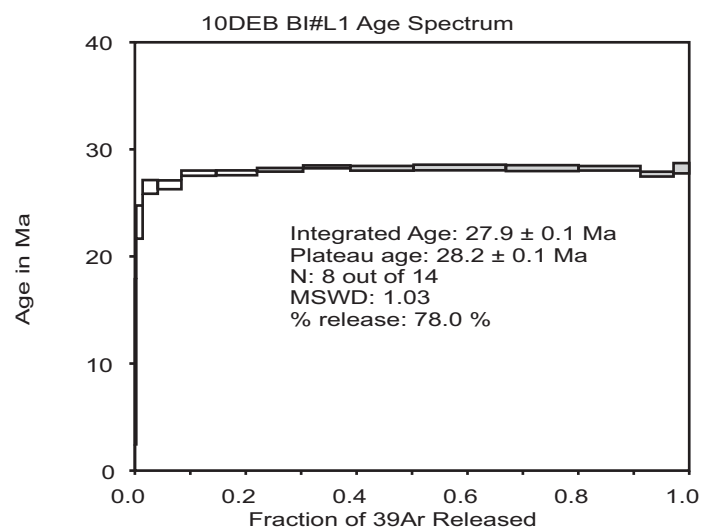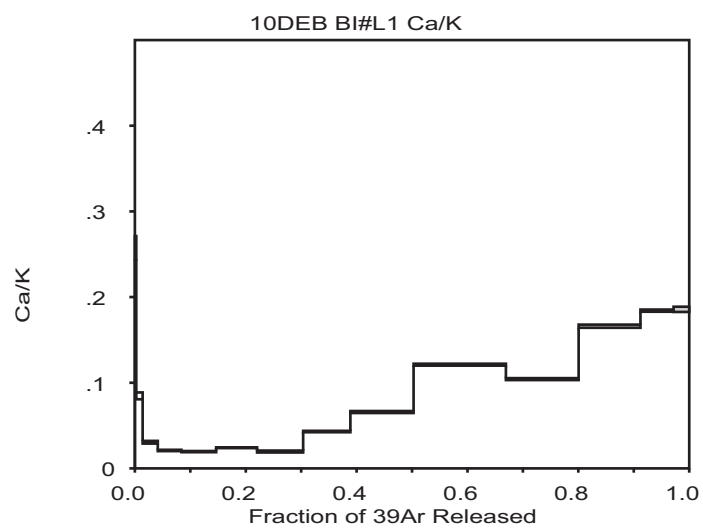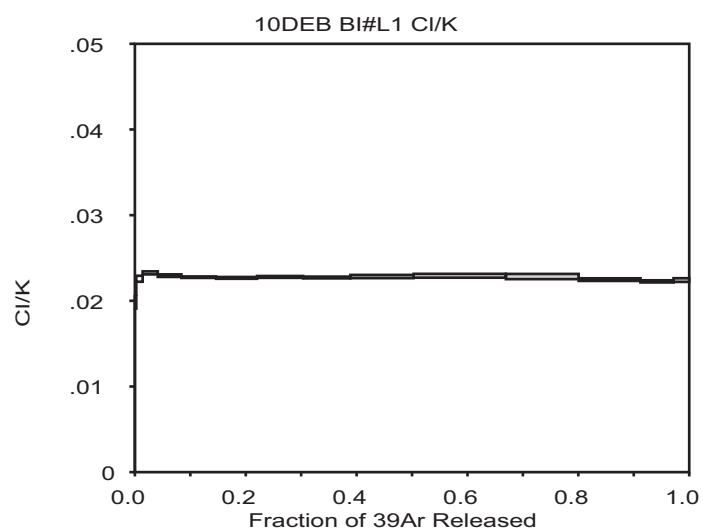

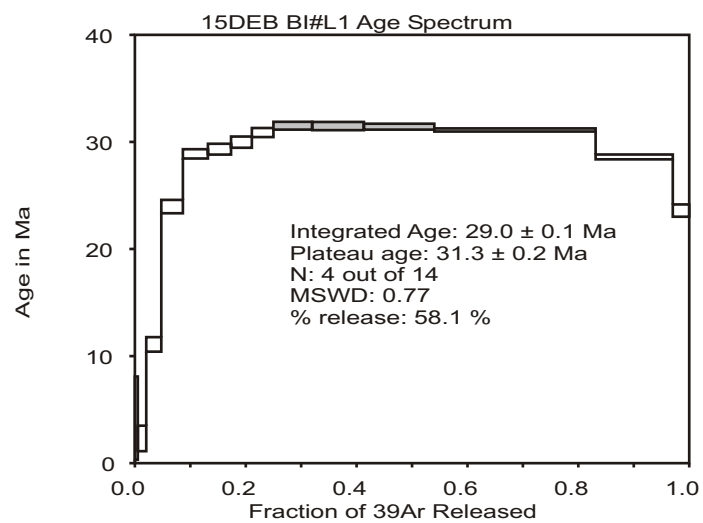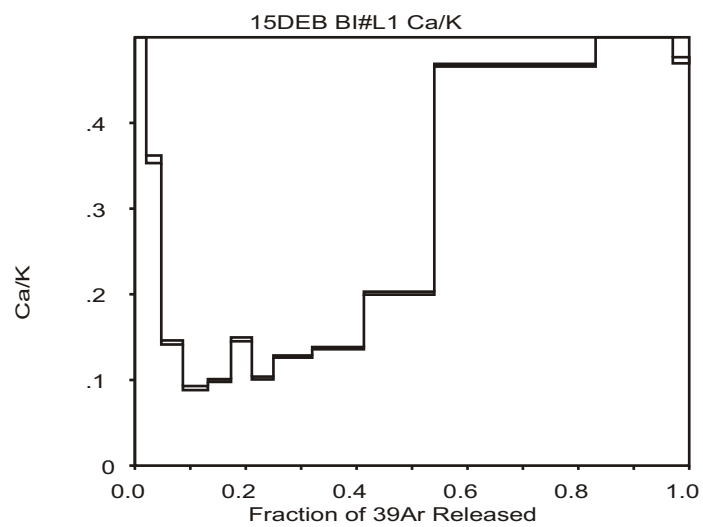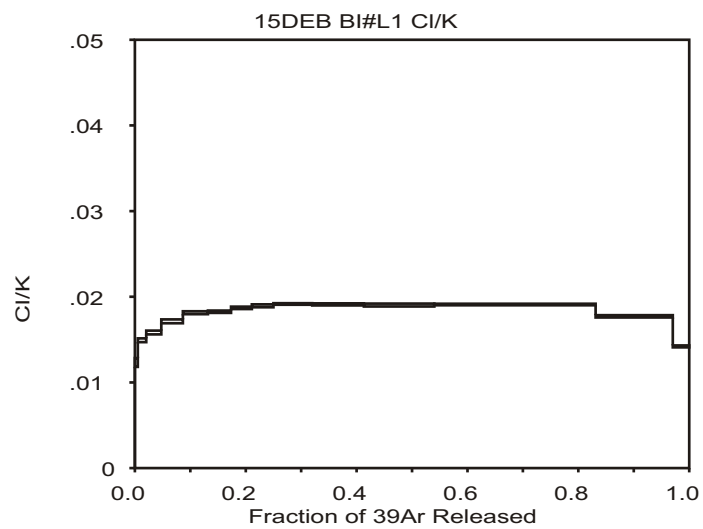

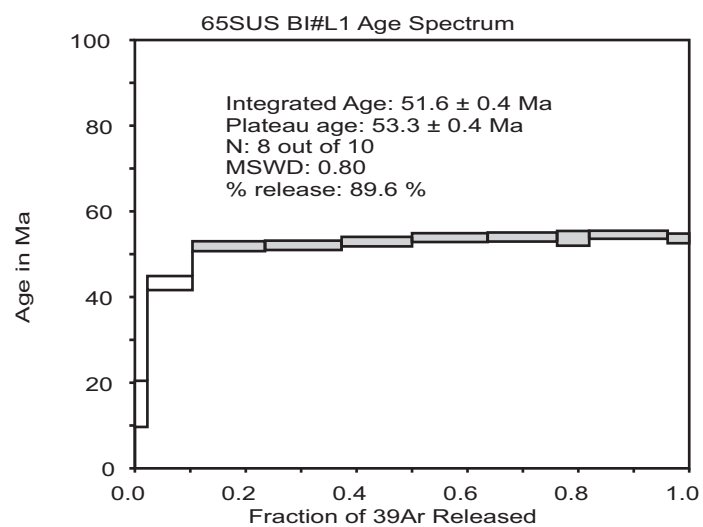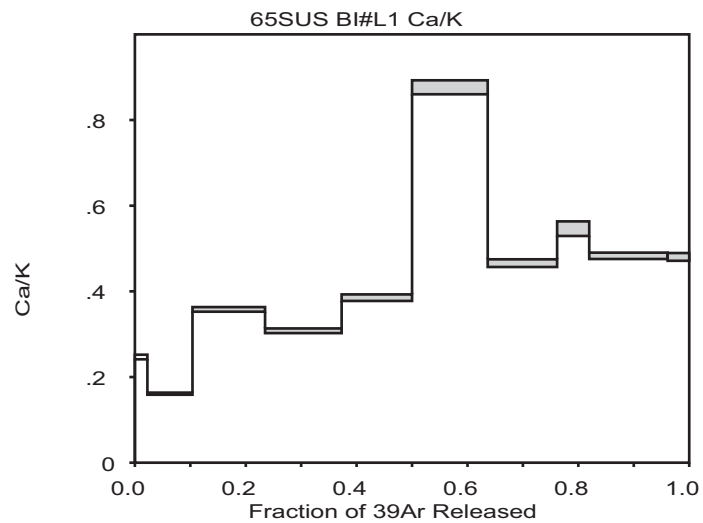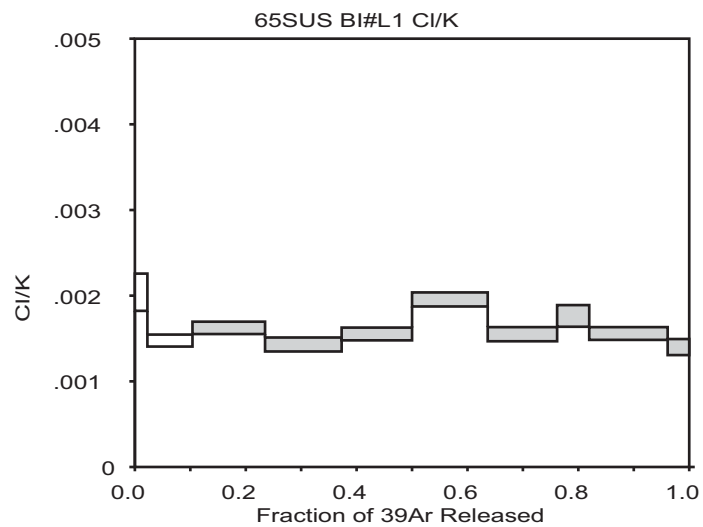

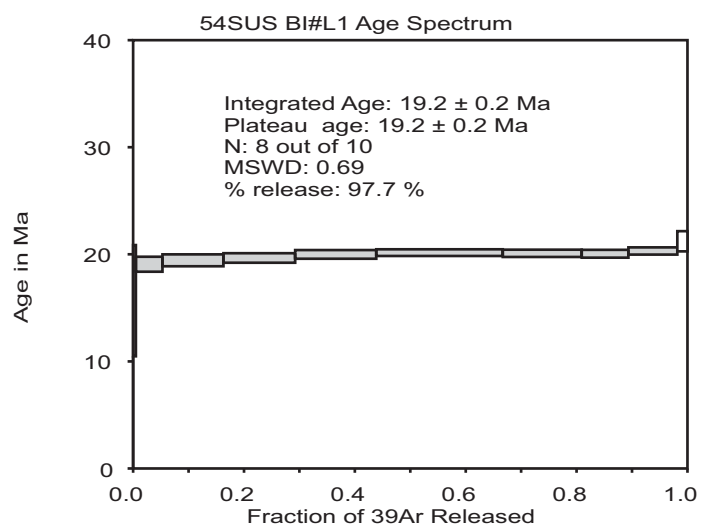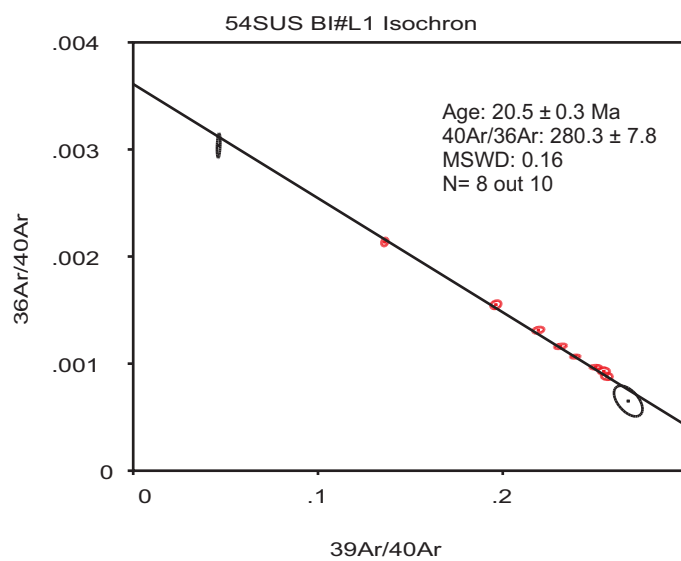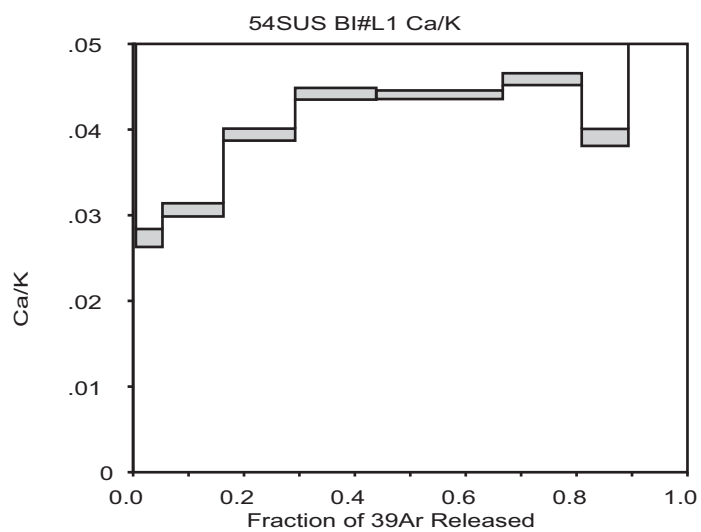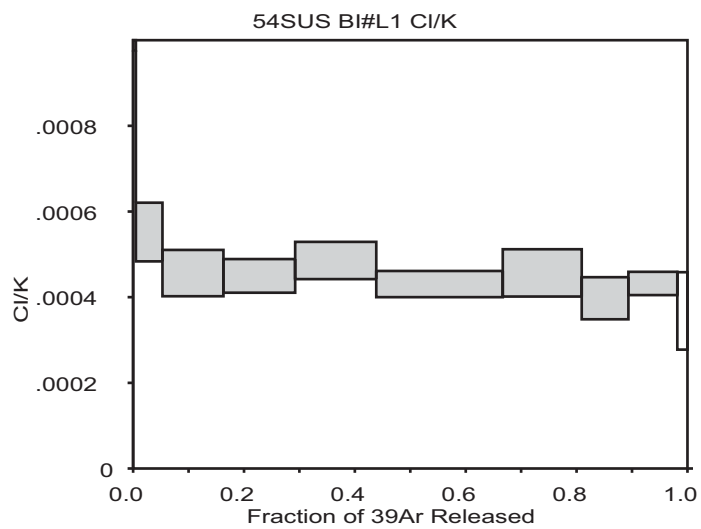

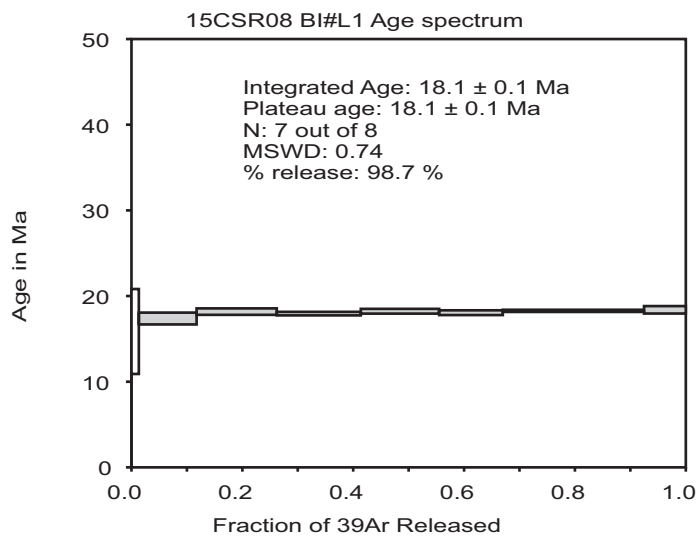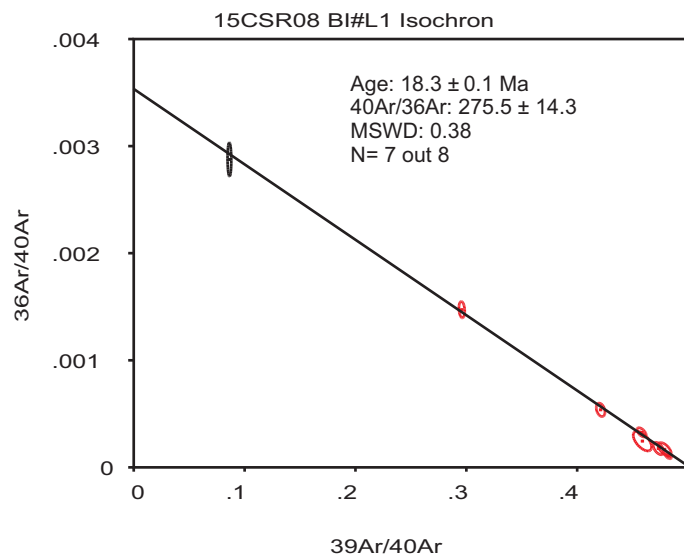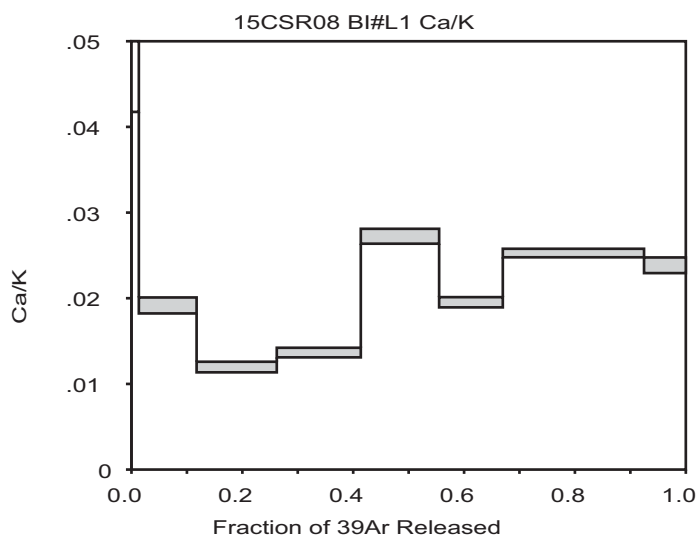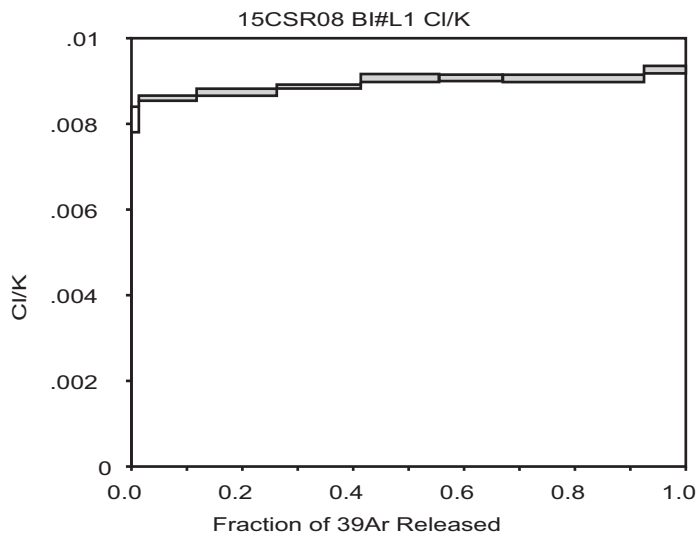

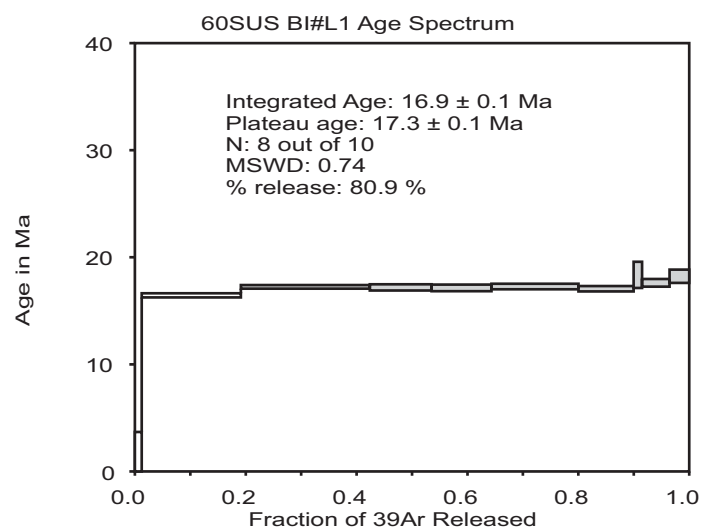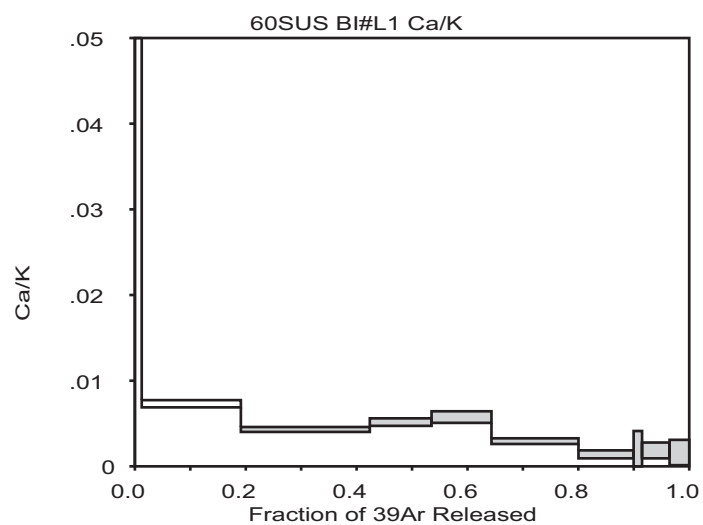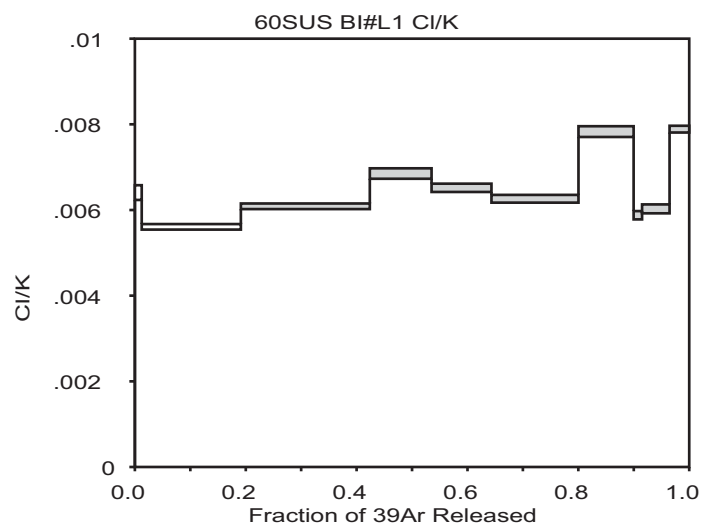

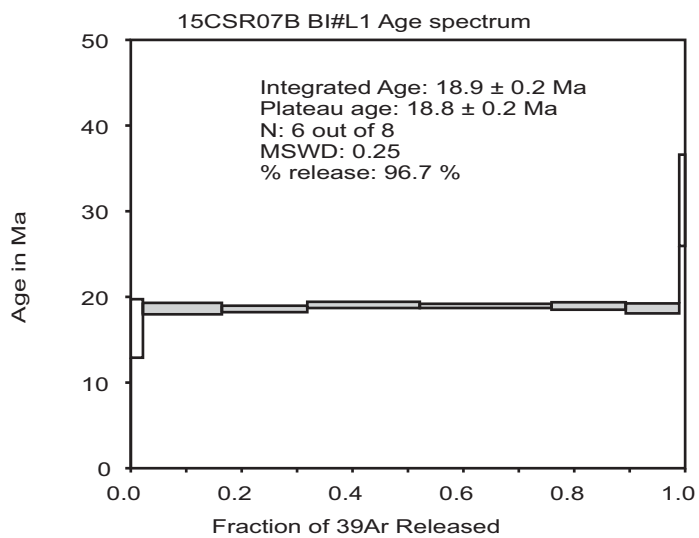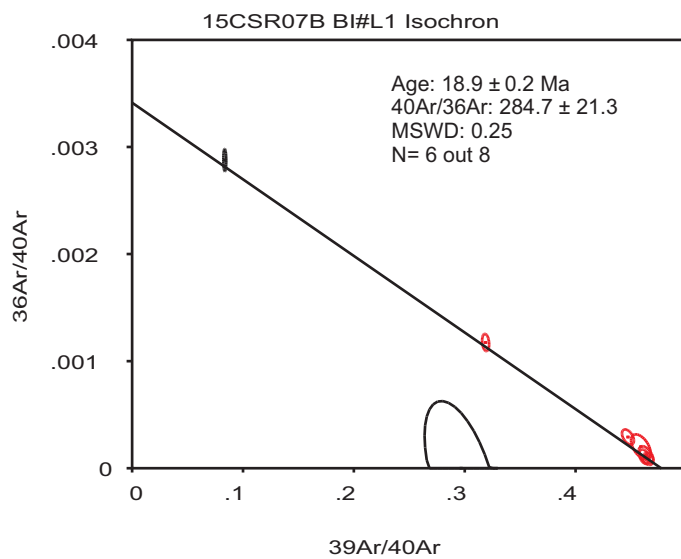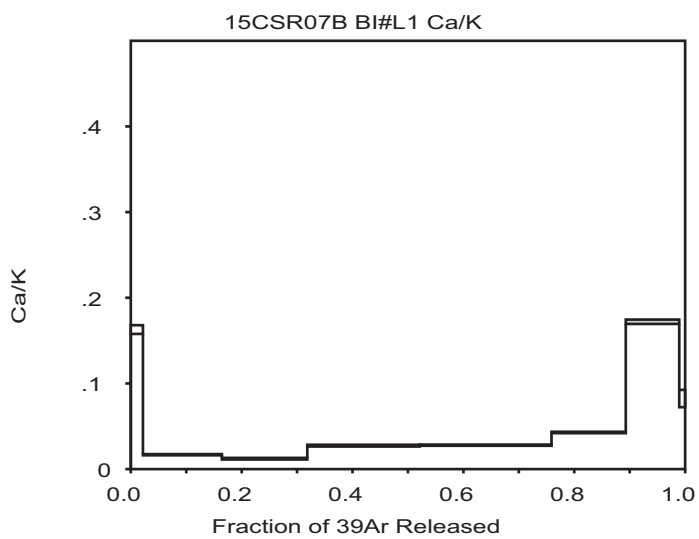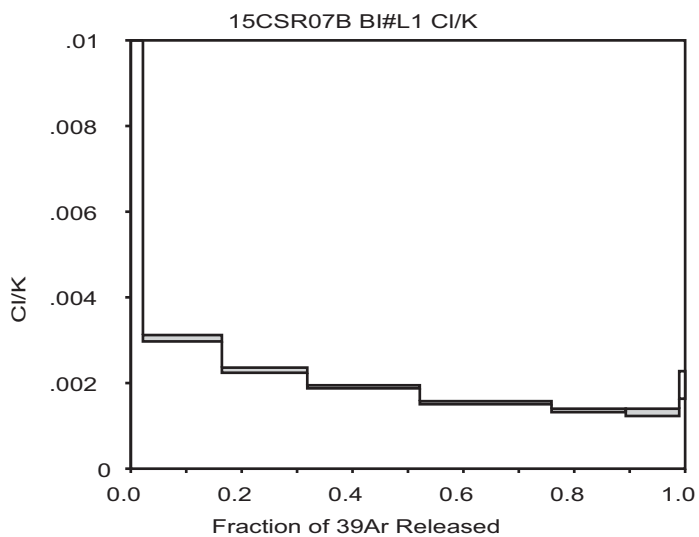

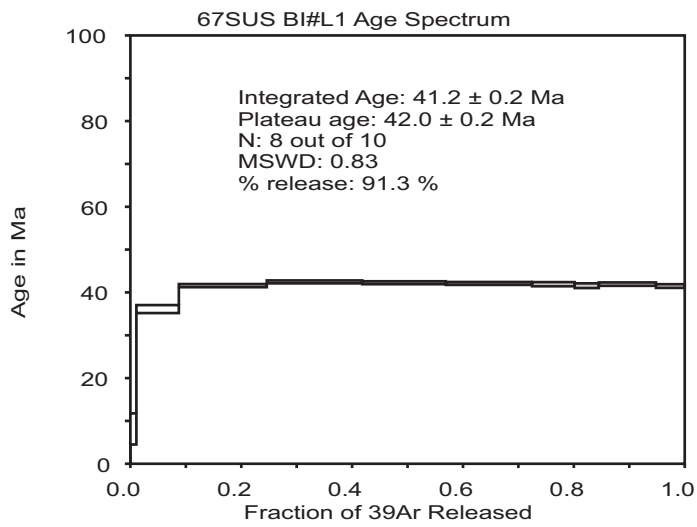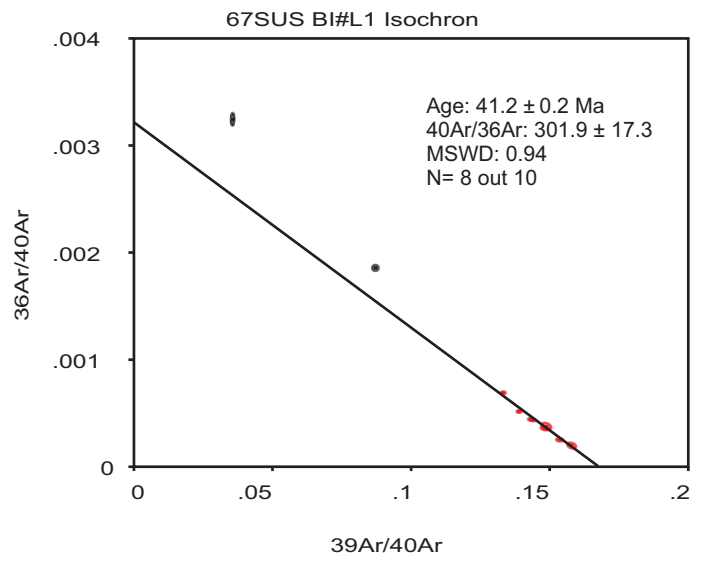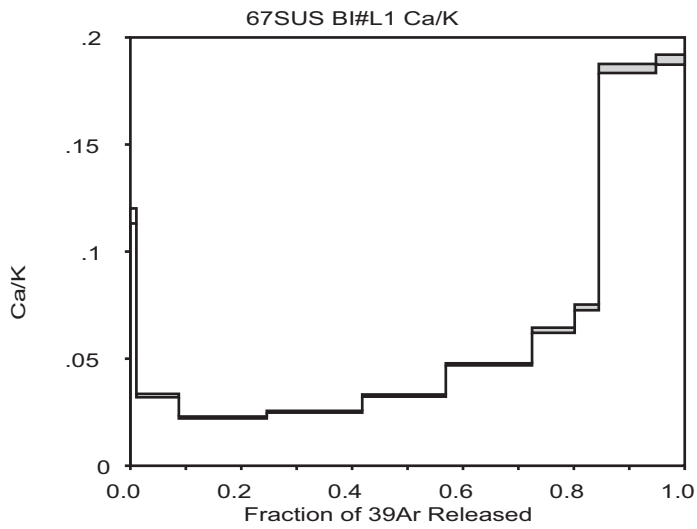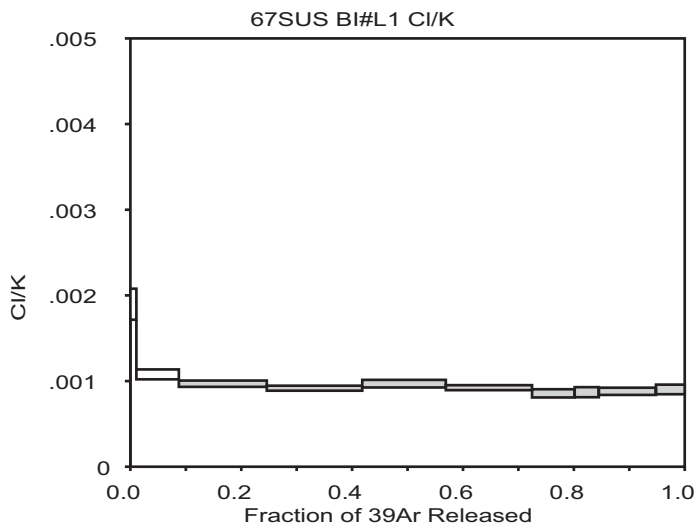



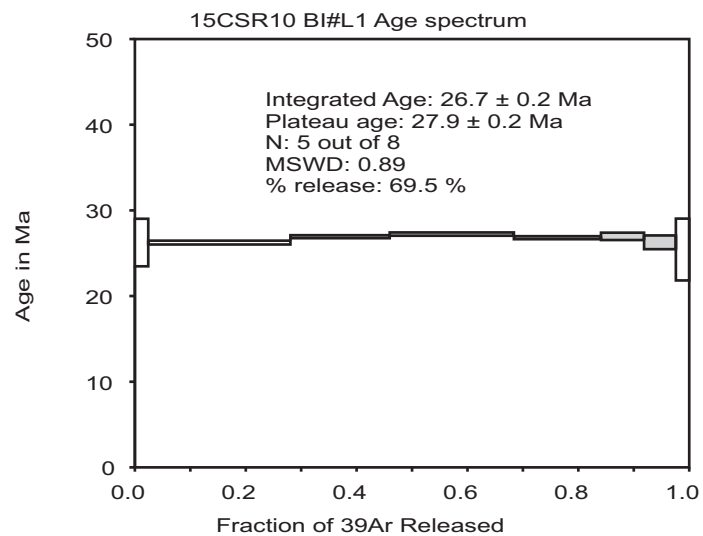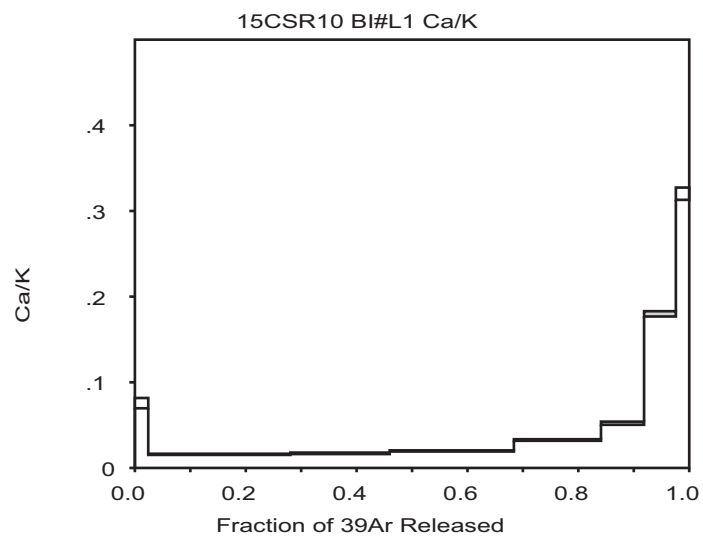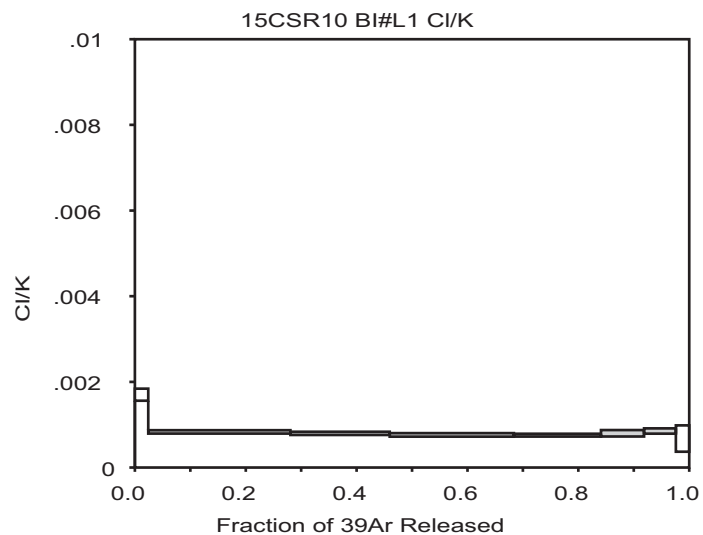

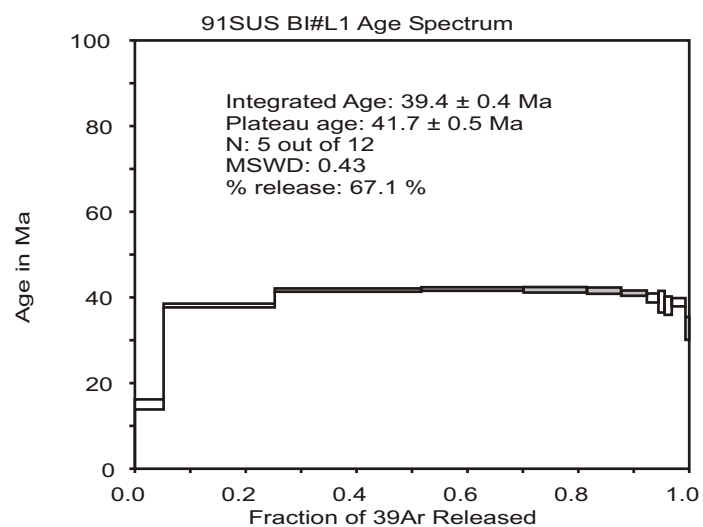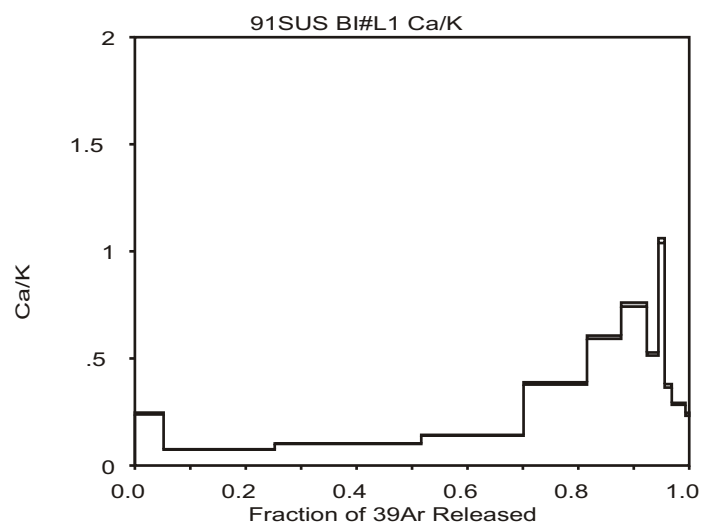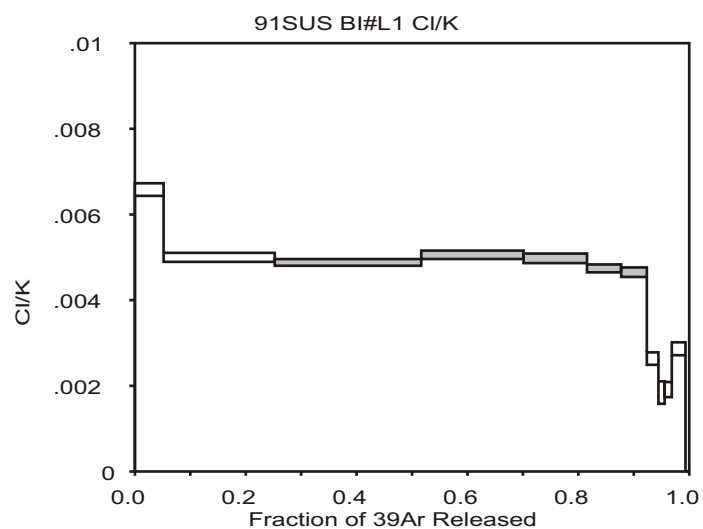

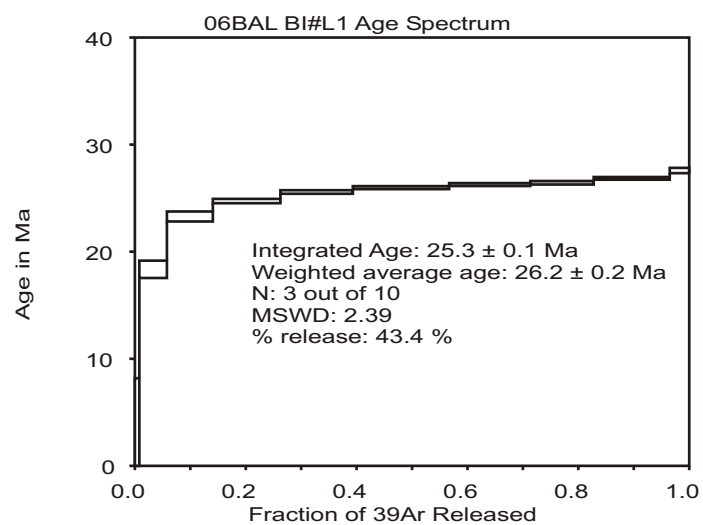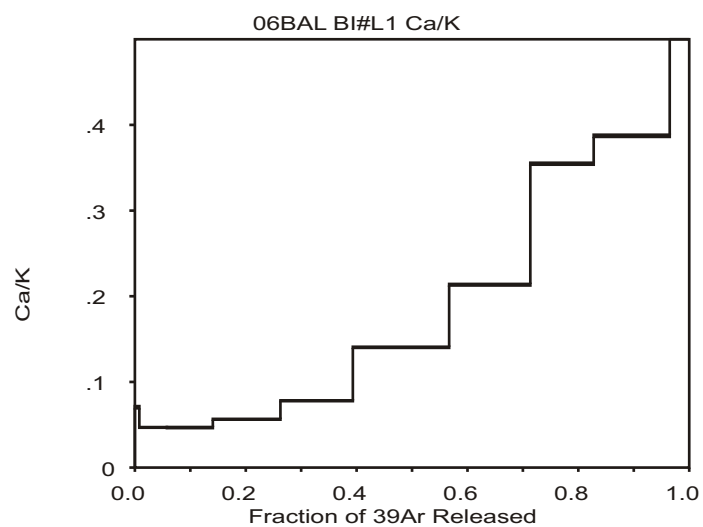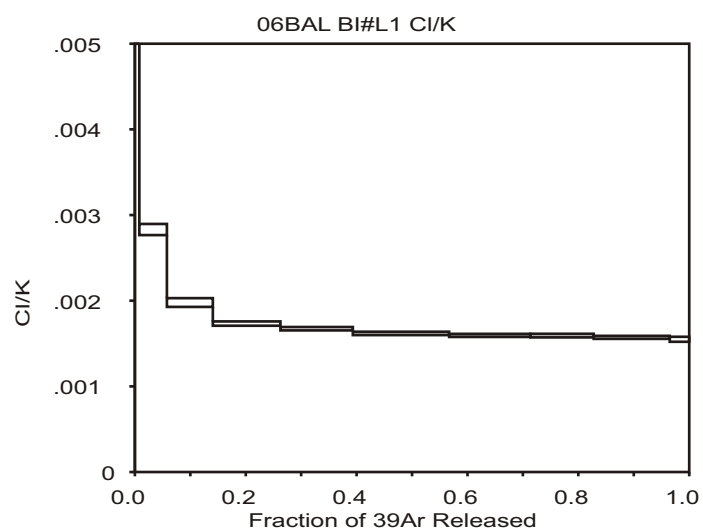

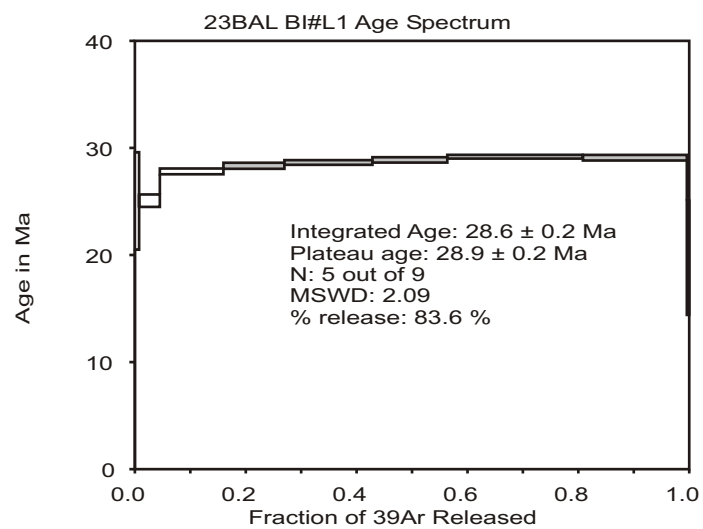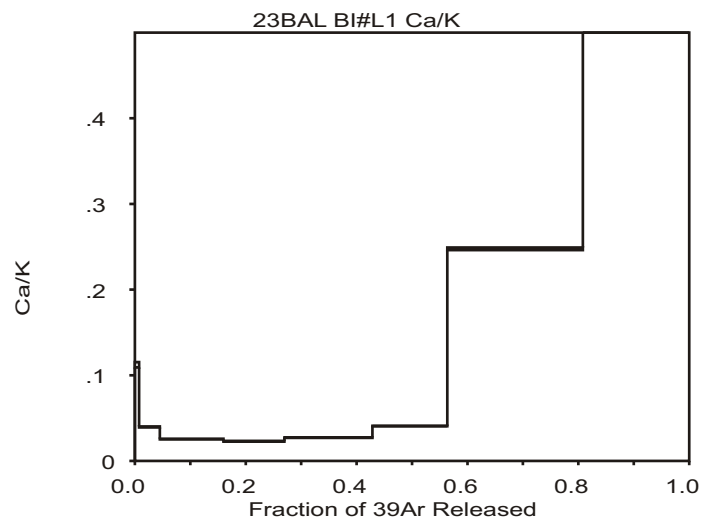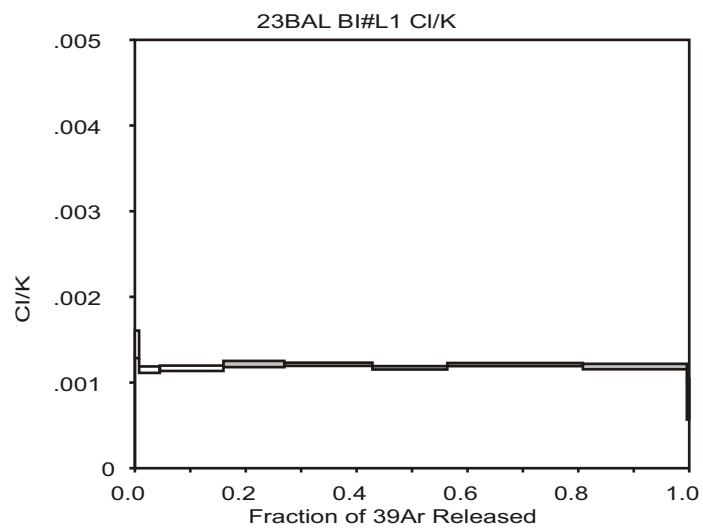

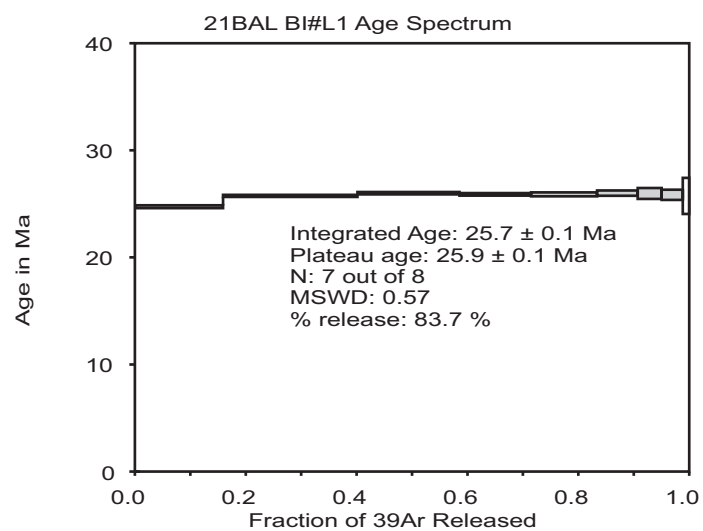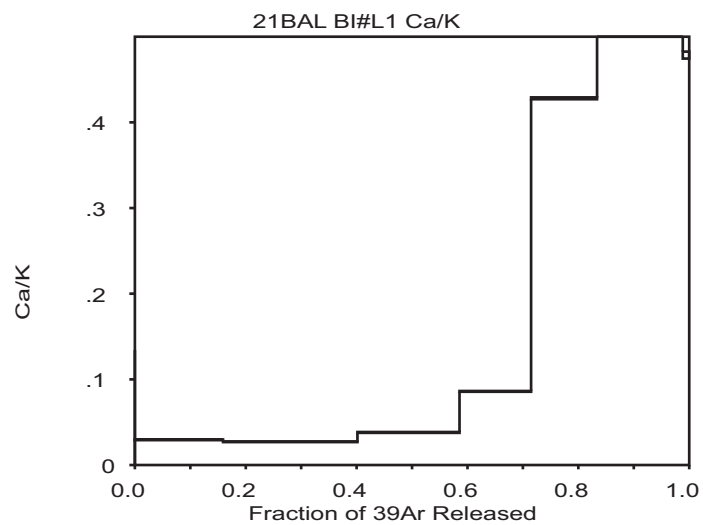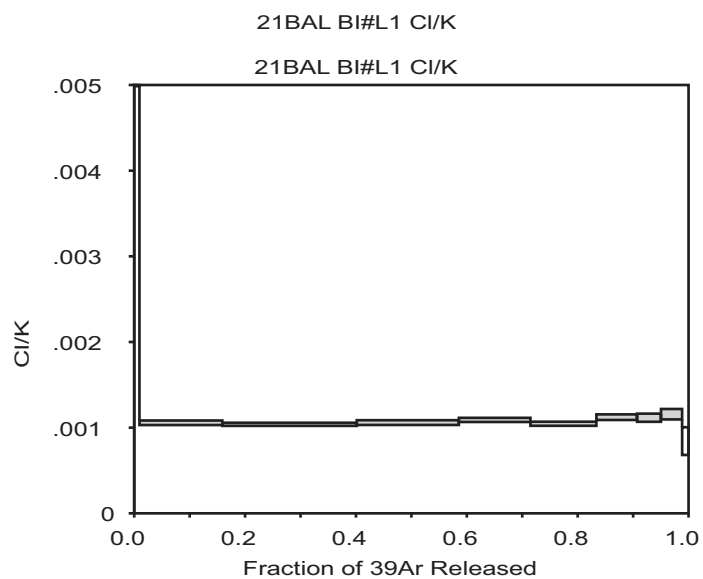

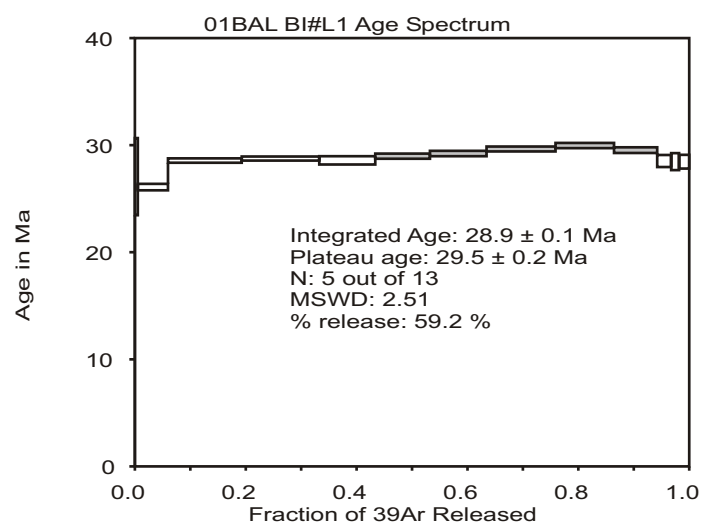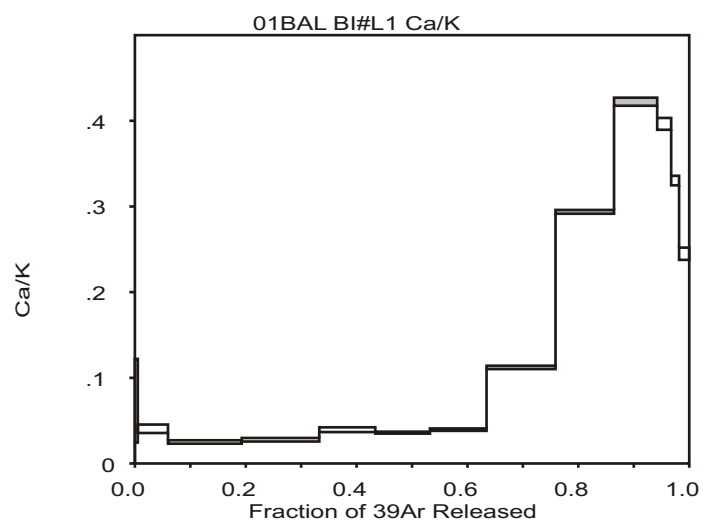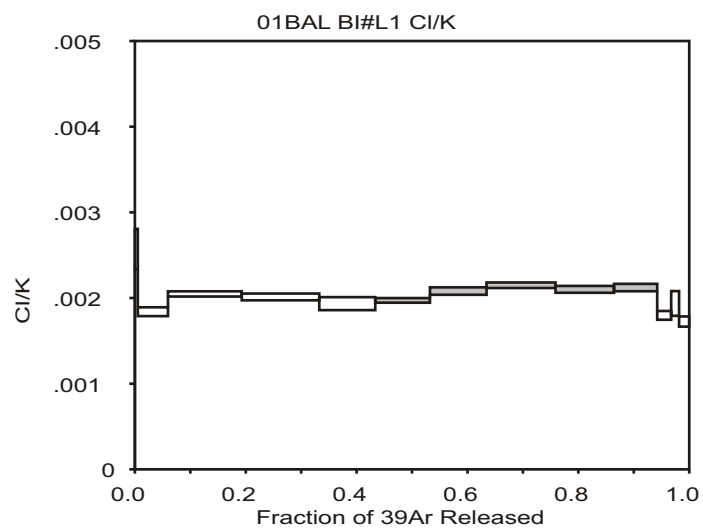

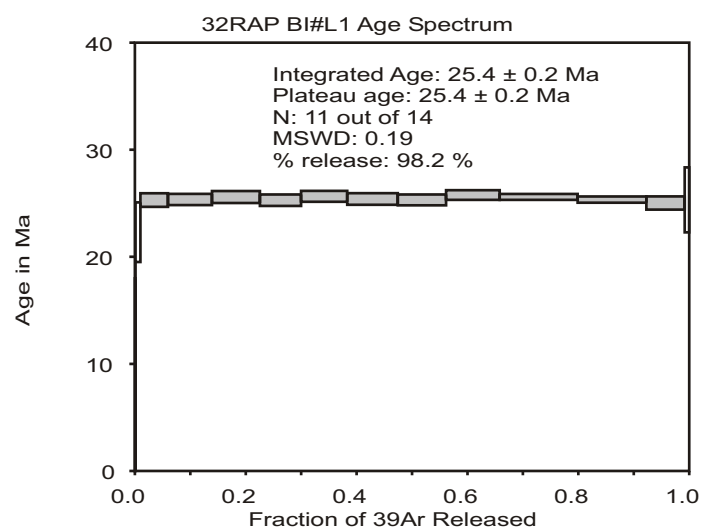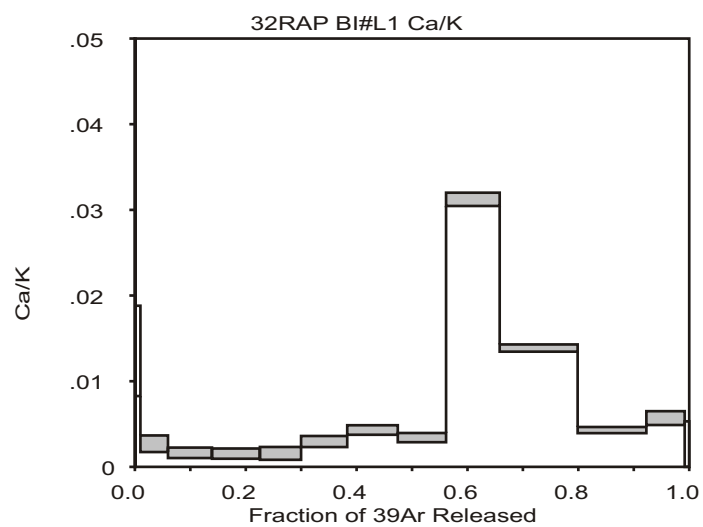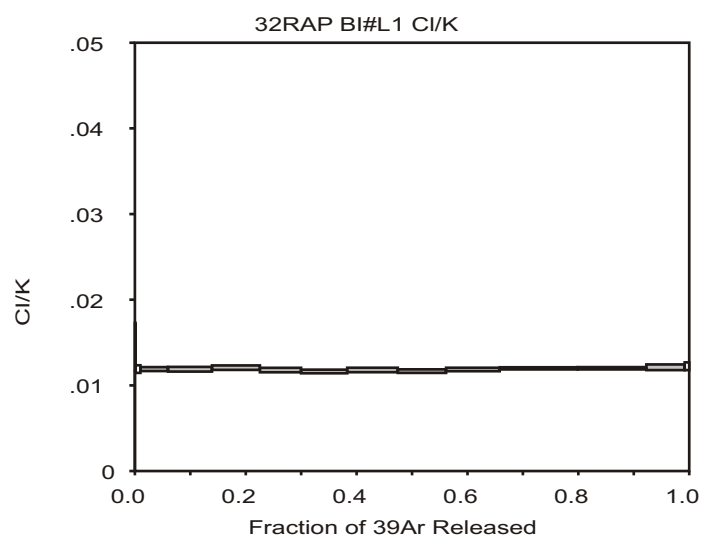

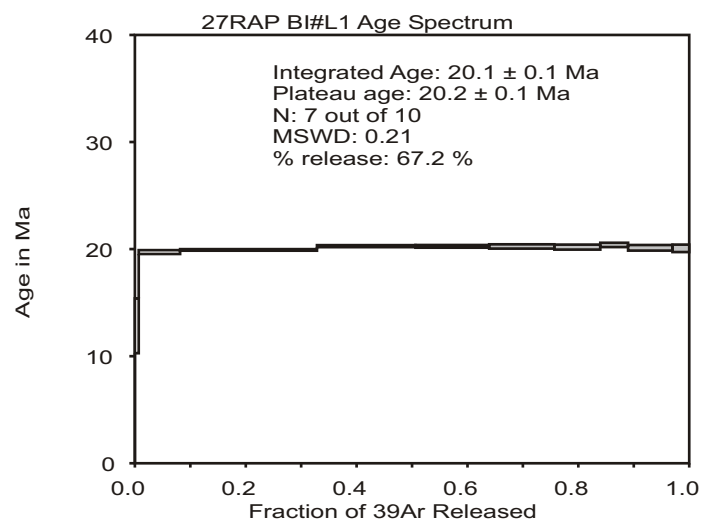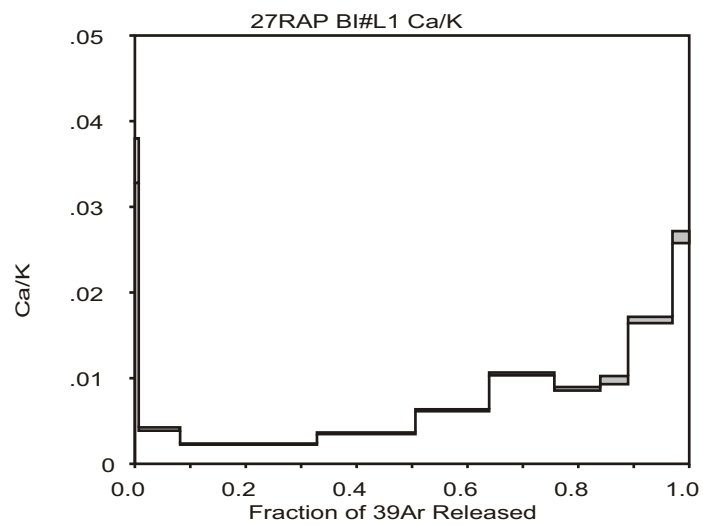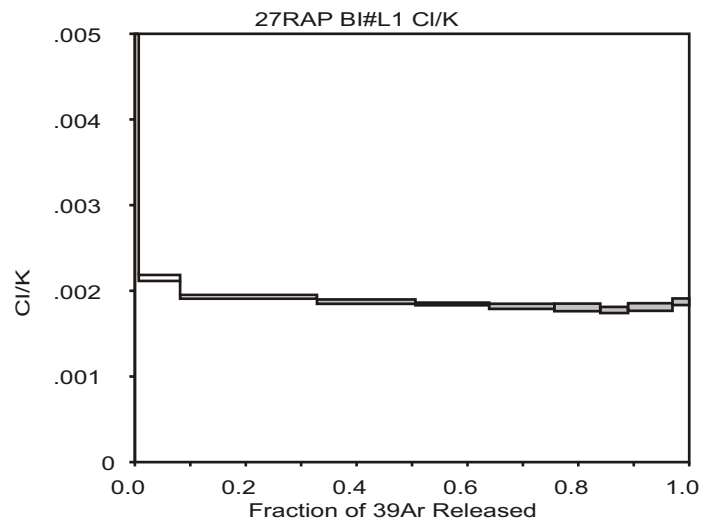



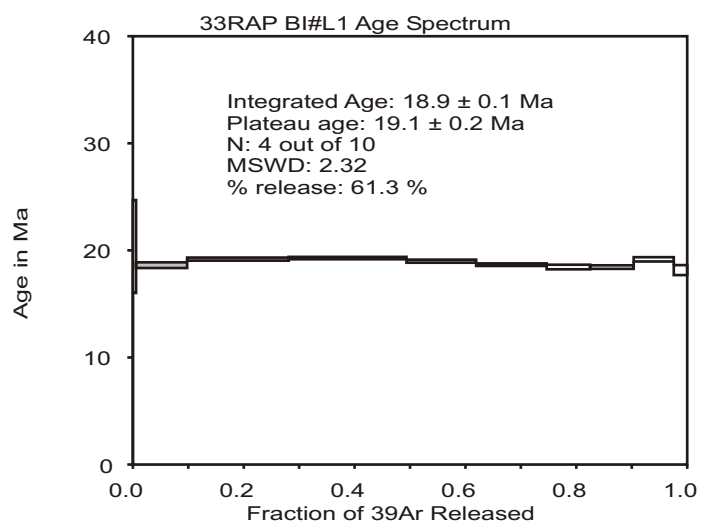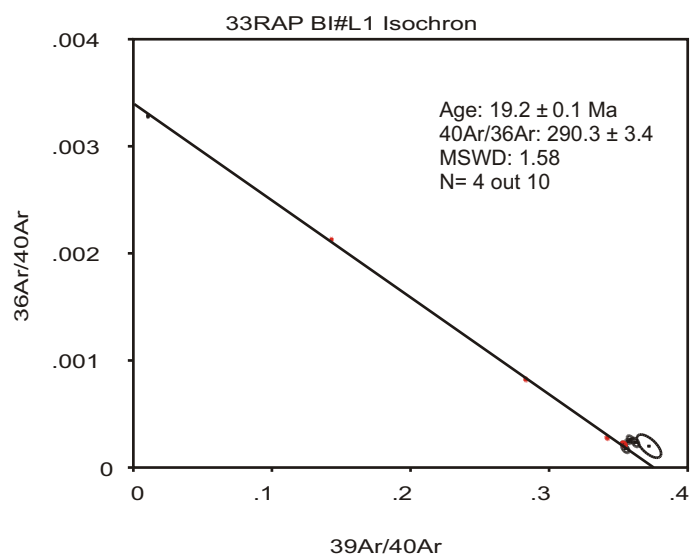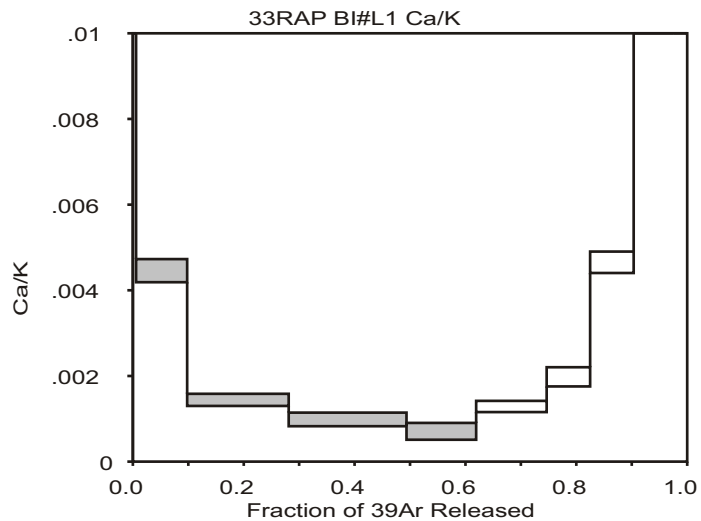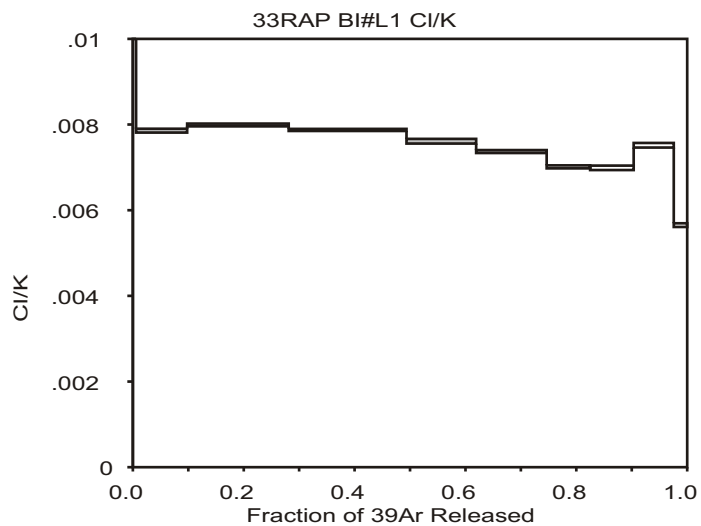

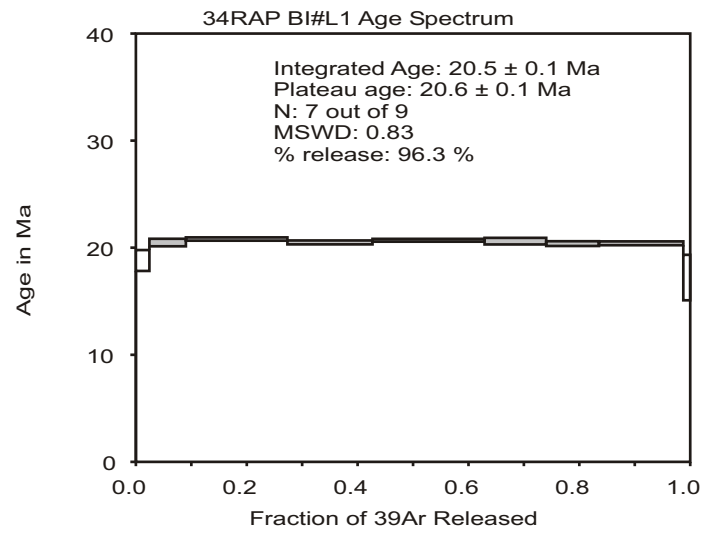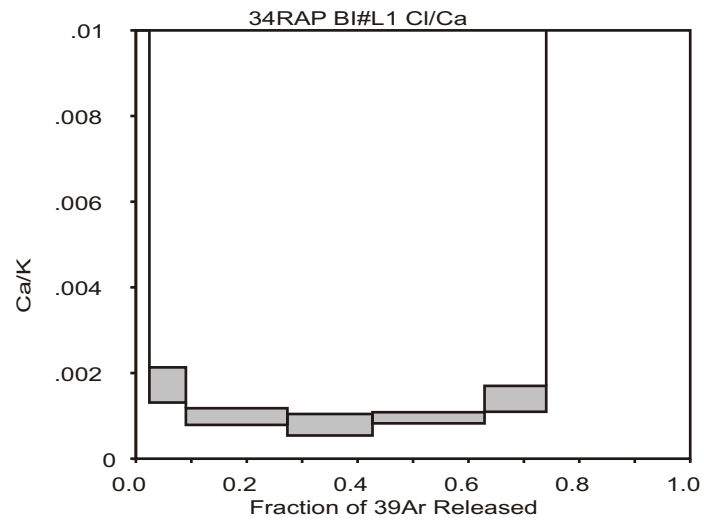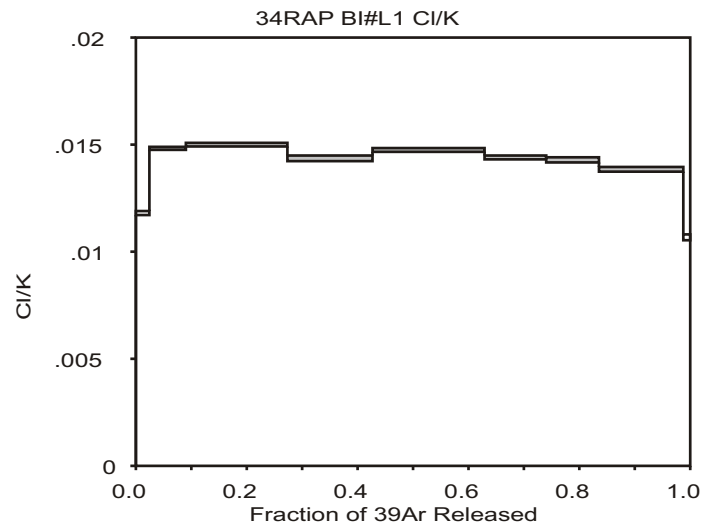

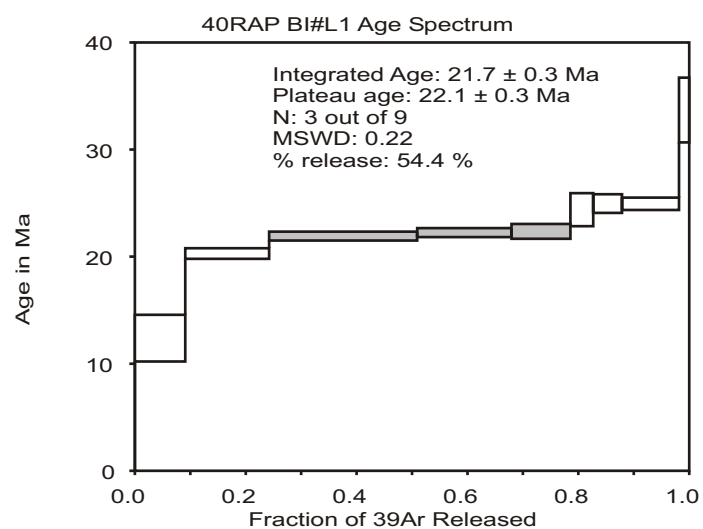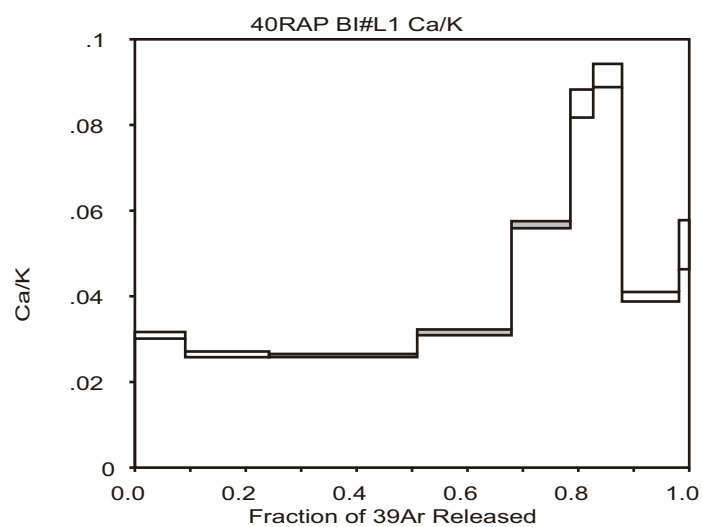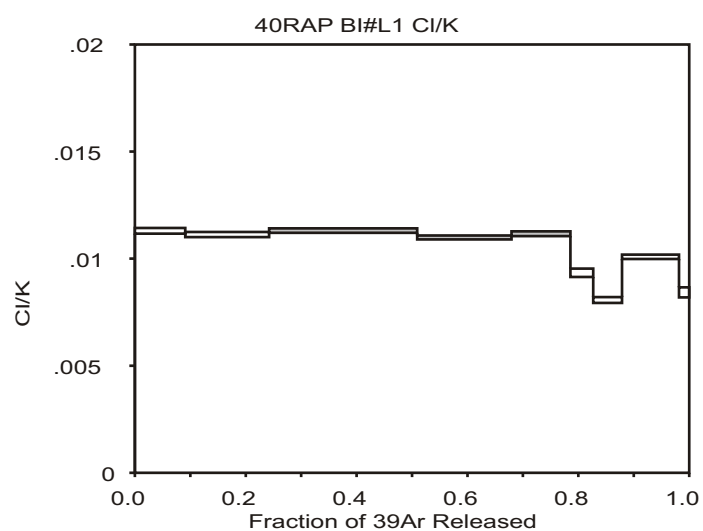

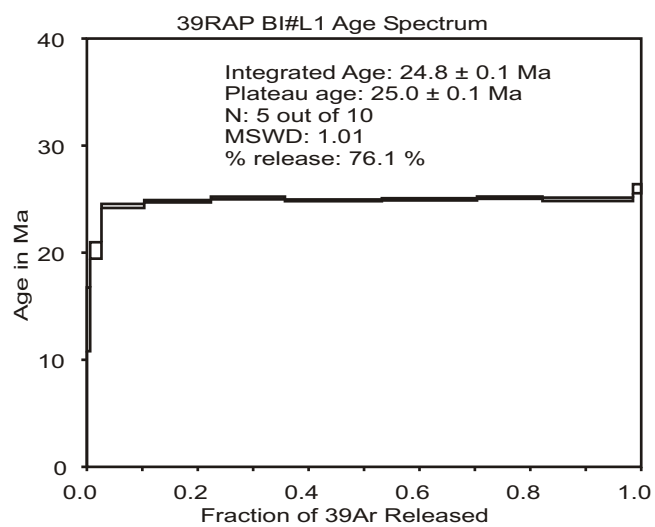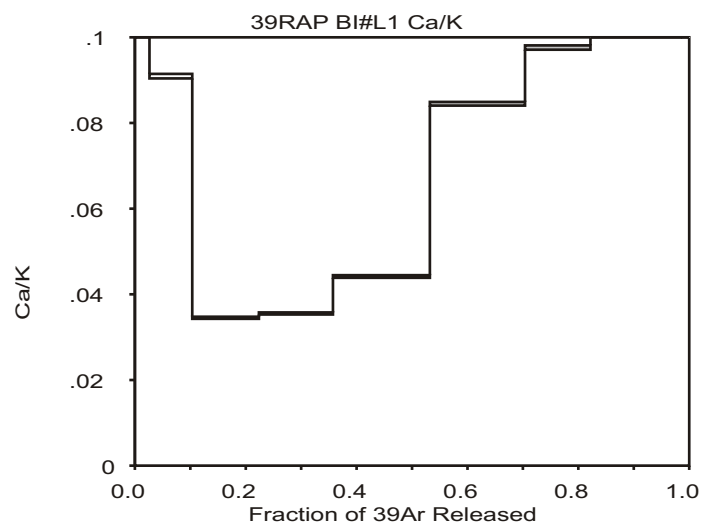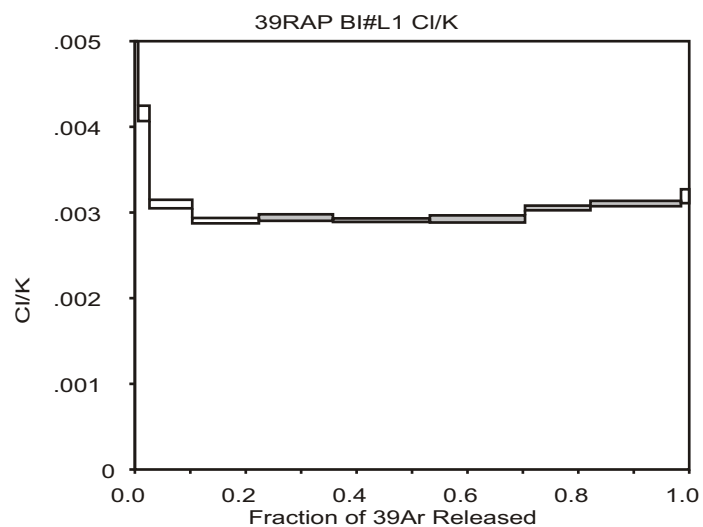

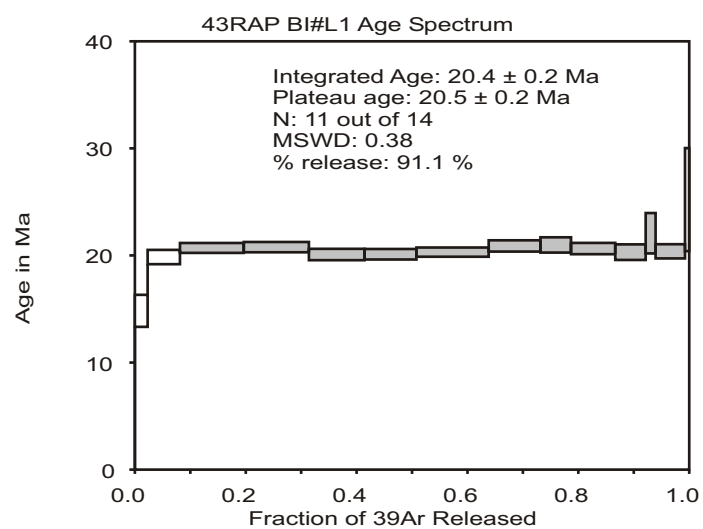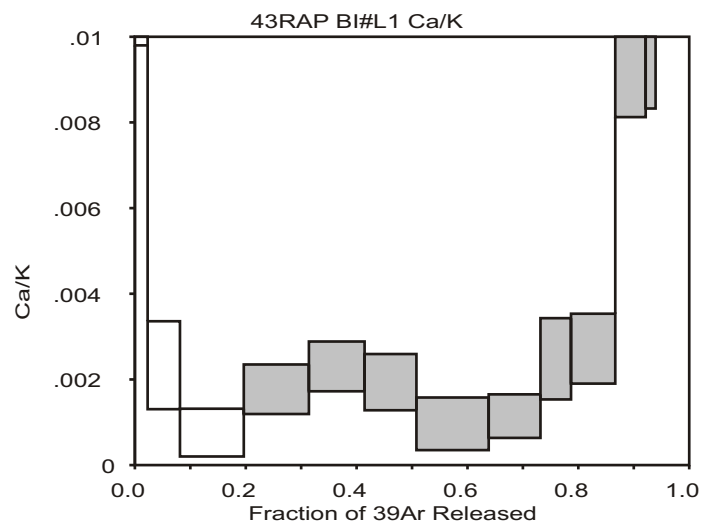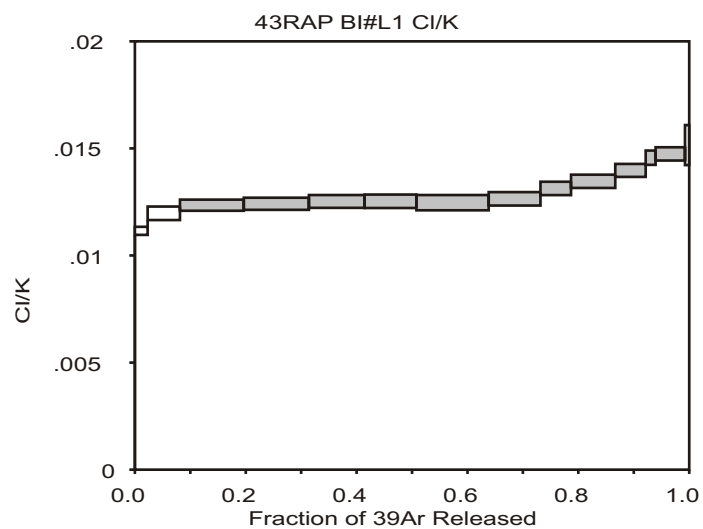

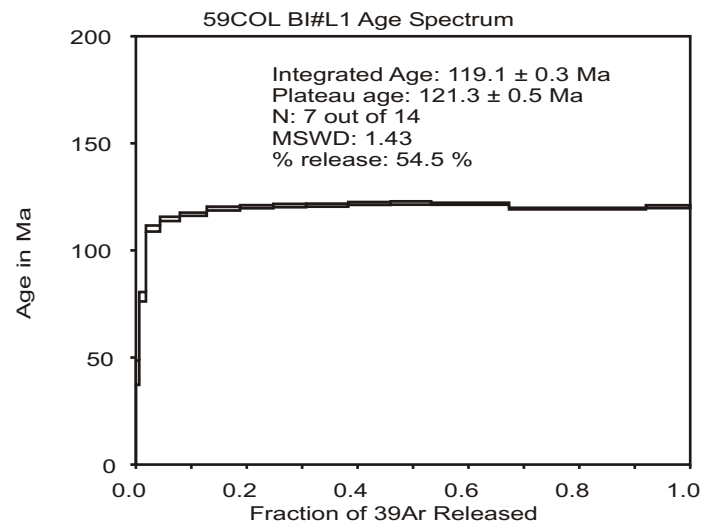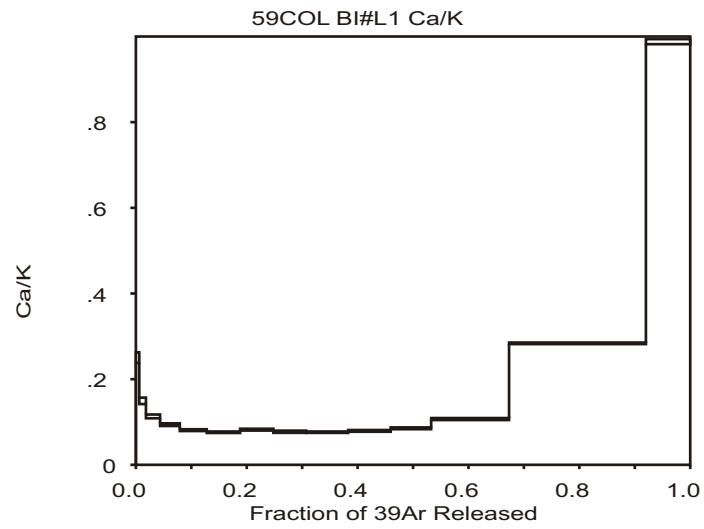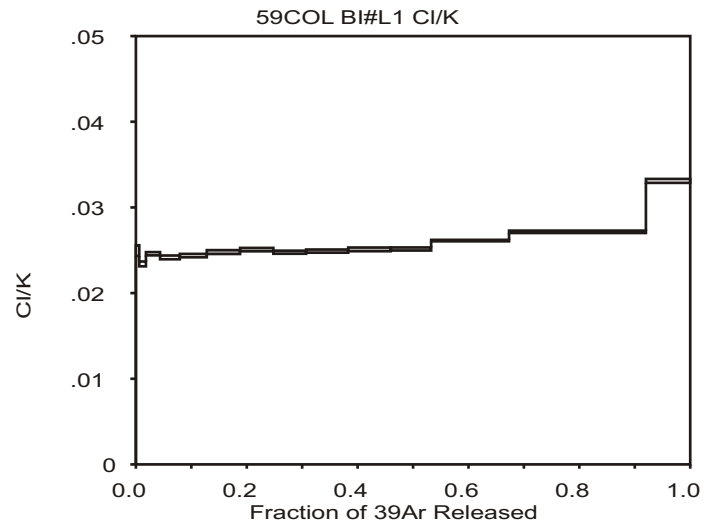

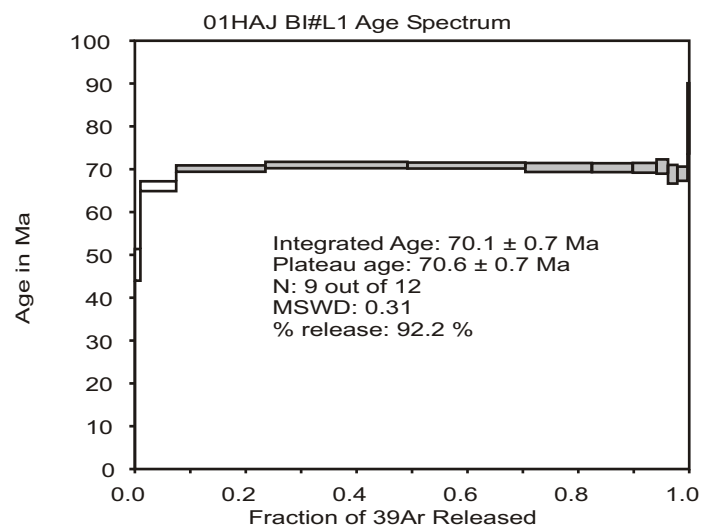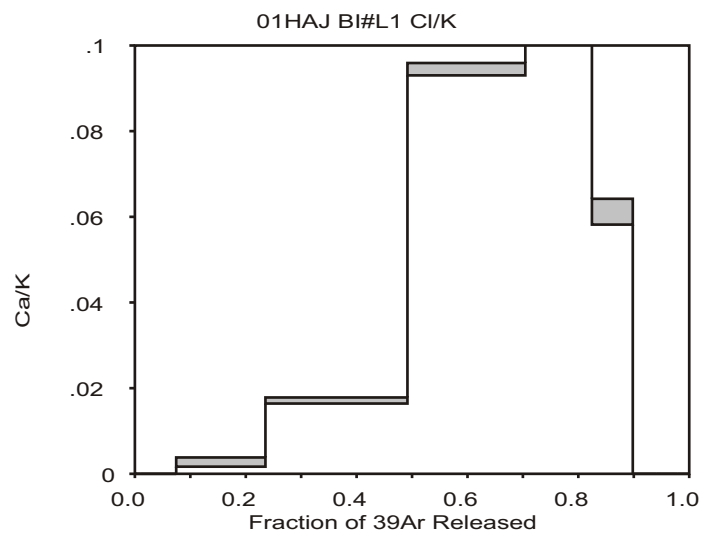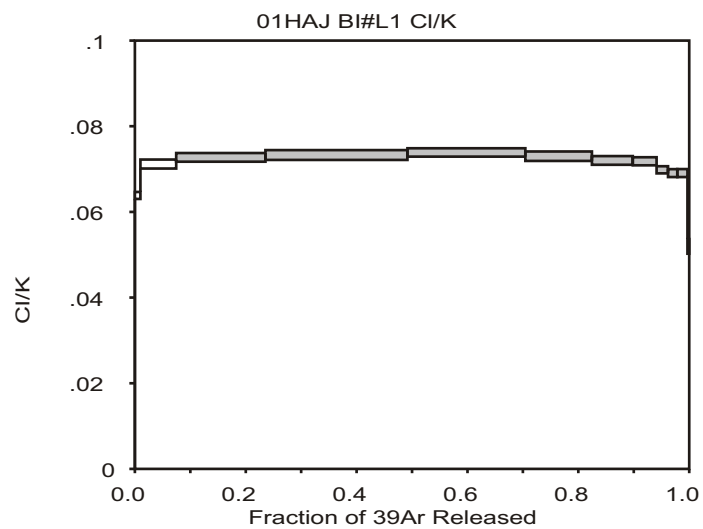

Supplement: Supplementary file 6 [file 2]

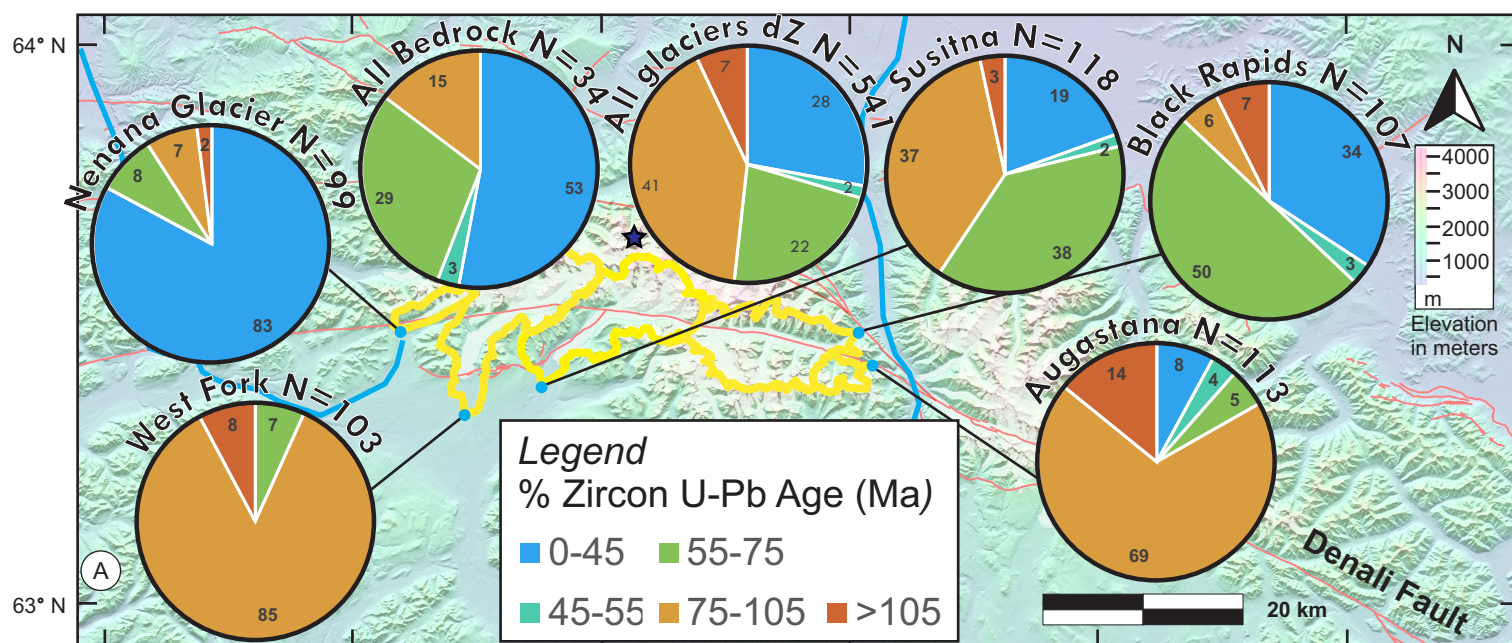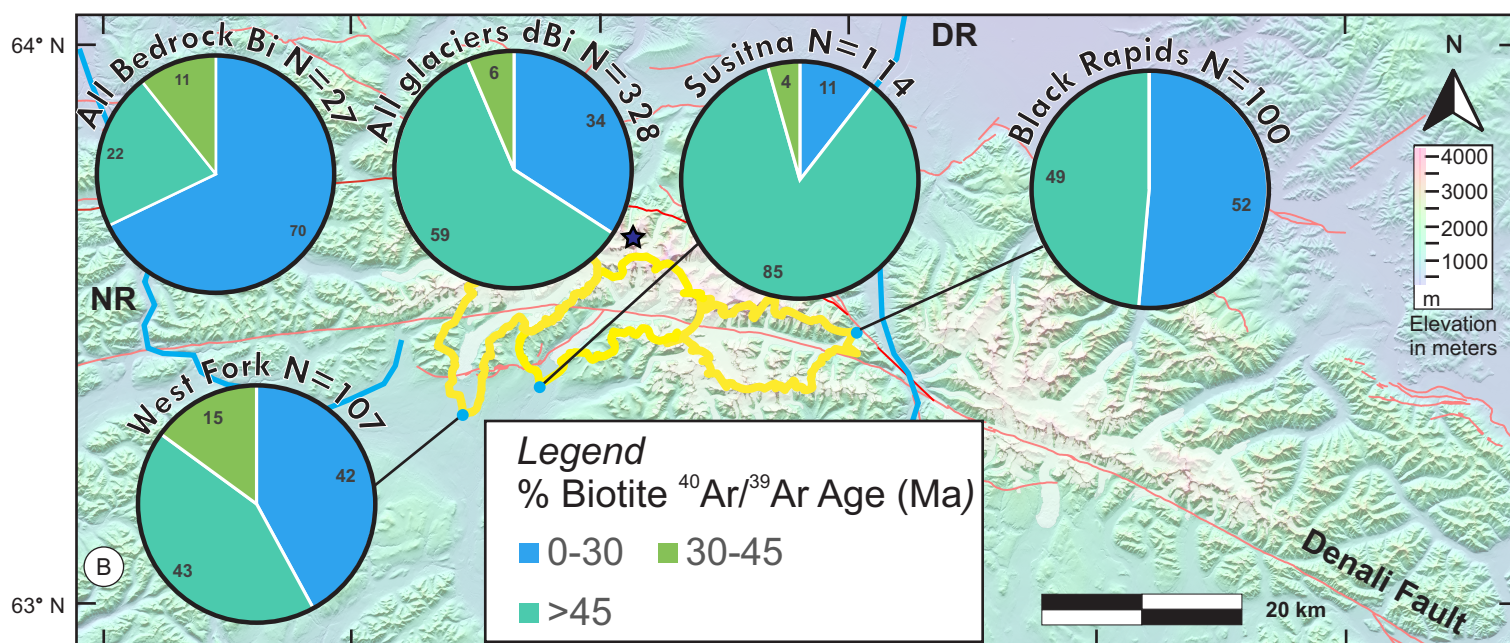

Supplement: Supplementary file 7 [file 2]
